# Supplementary material
Source: PubMed Central journal article supplement (PMC11562161)

# **An Ensemble Deep Learning Algorithm for Structural Heart Disease Screening Using Electrocardiographic Images: PRESENT SHD**

## **Online Supplement 2**

**Examples of electrocardiogram formats used for model development,  
evaluation to mimic real-world variation.**

## **Contents.**

**Section 1. Random examples of the same electrocardiogram plotted in 50 different formats used during model development**

**Section 2. Random examples of 25 electrocardiogram images plotted in standard clinical layout used during model evaluation**

**Section 3. Random examples of 25 electrocardiogram images plotted in novel format (Black-on-Red Standard) not encountered during model development**

**Section 4. Random examples of 25 electrocardiogram images plotted in novel format (Blue-on-Black Standard) not encountered during model development**

**Section 5. Random examples of 25 electrocardiogram images plotted in novel format (Black-on-Black Rhythm-on-top) not encountered during model development**

**Section 6. Random examples of 25 electrocardiogram images plotted in novel format (Blue-on-Red Rhythm-on-top) not encountered during model development**



**Section 1. Random examples of the same electrocardiogram plotted in 50 different formats used during model development**

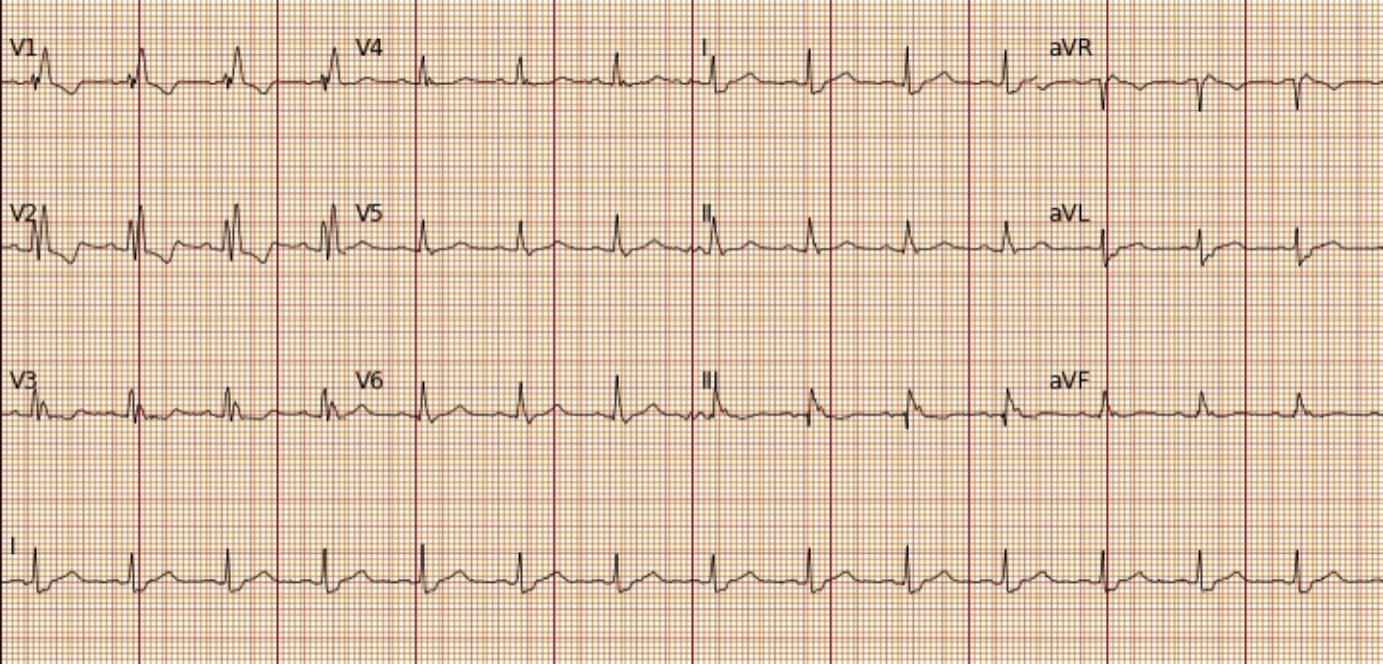



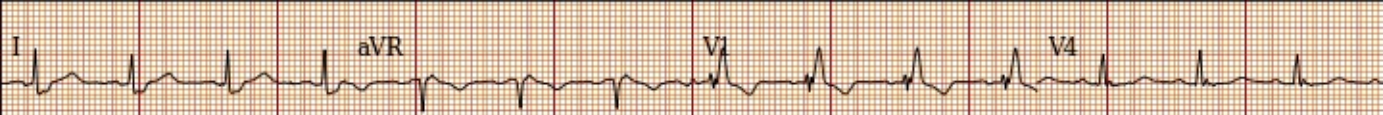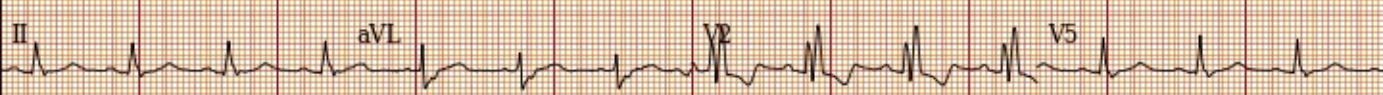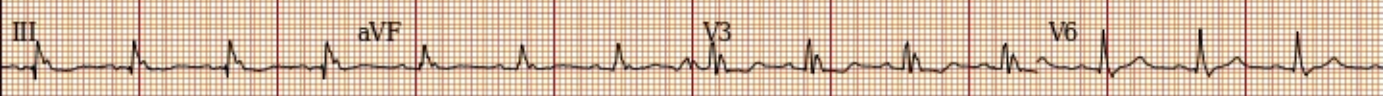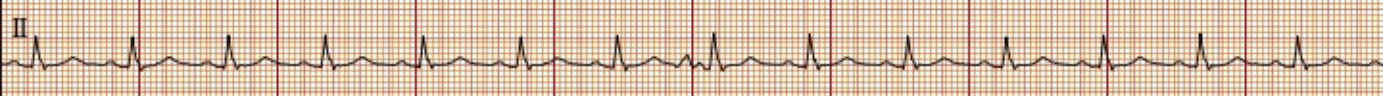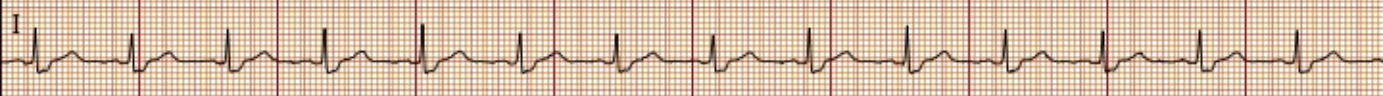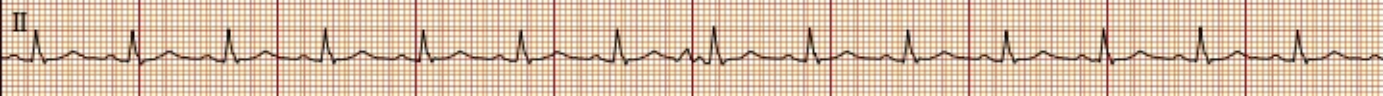

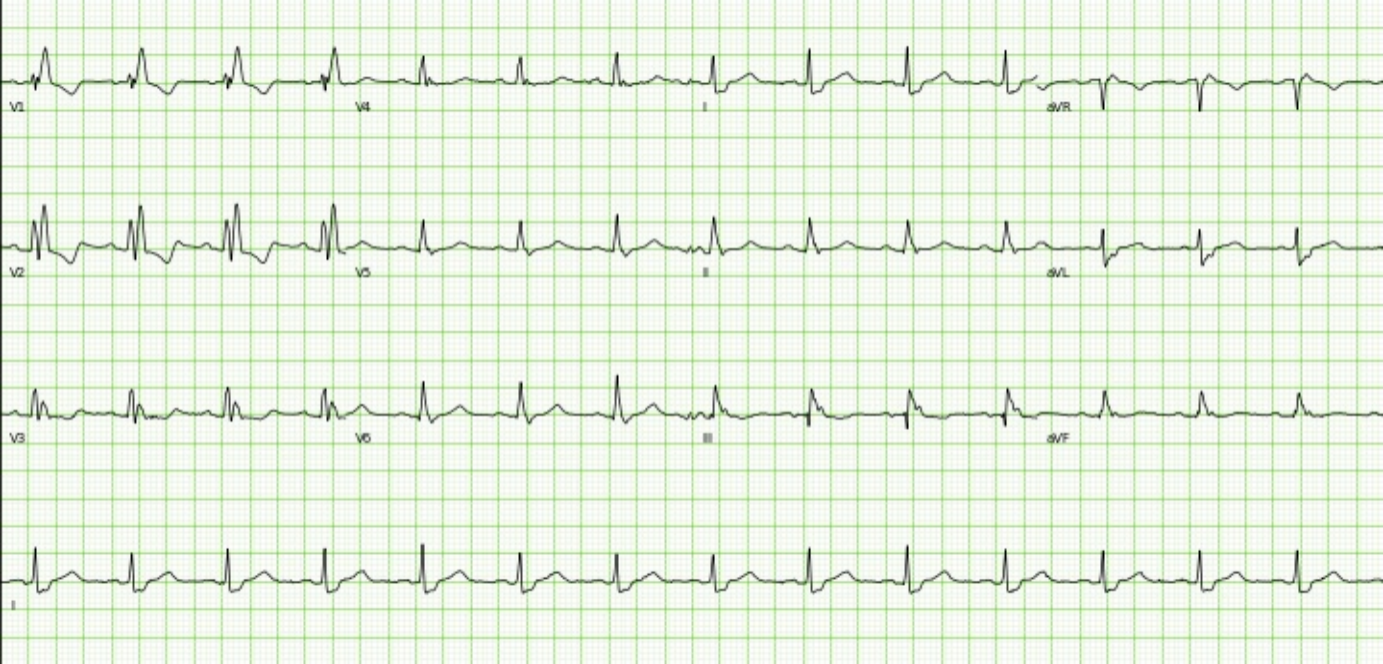

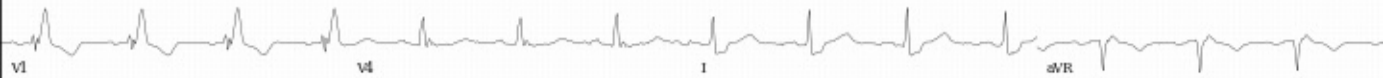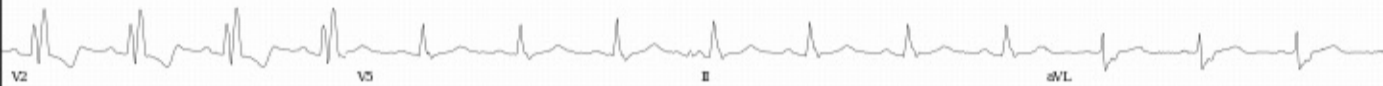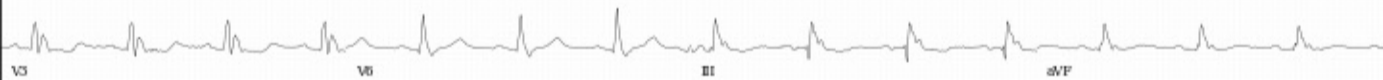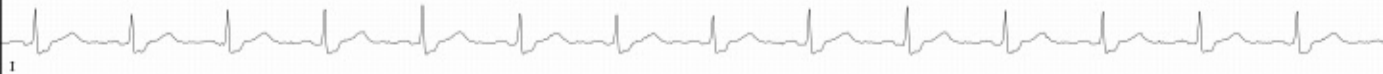

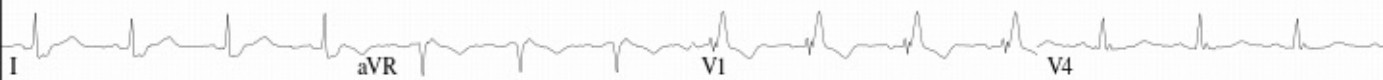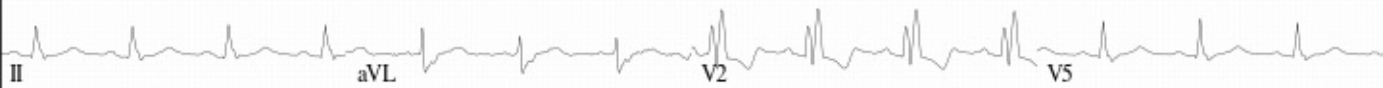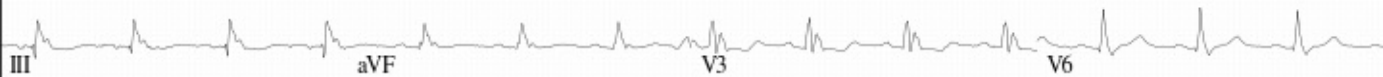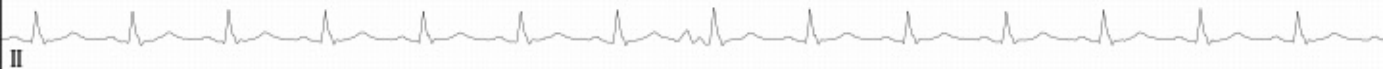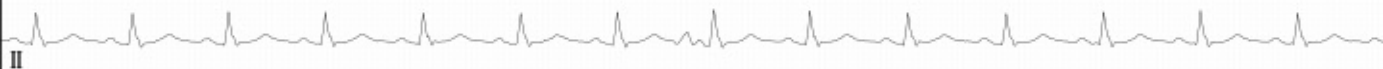



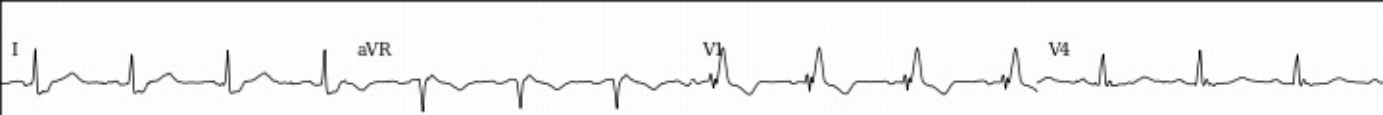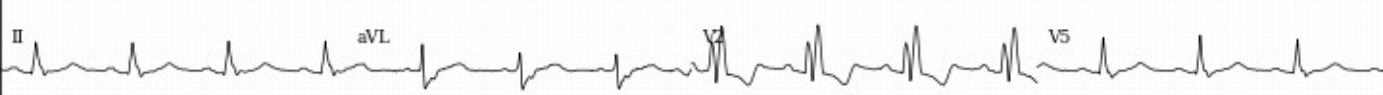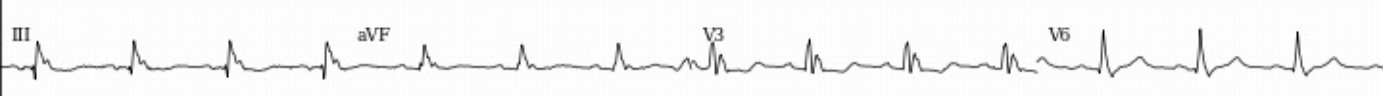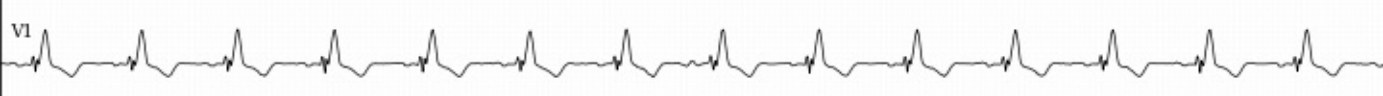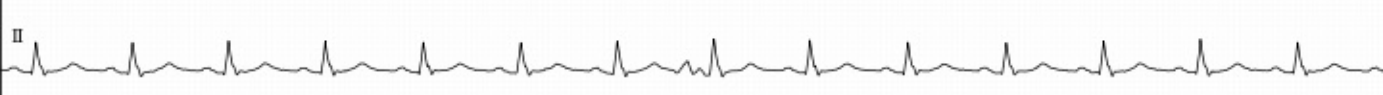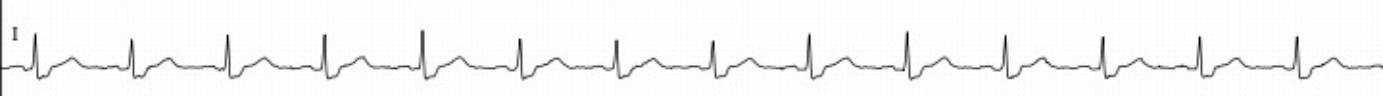

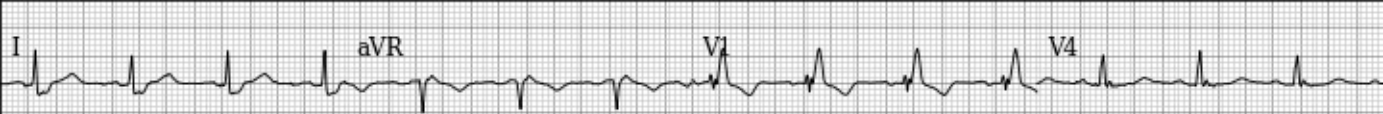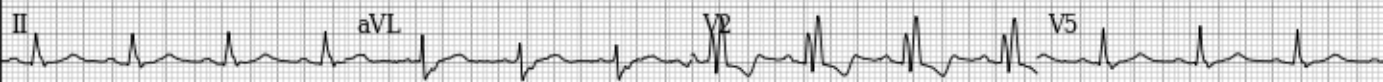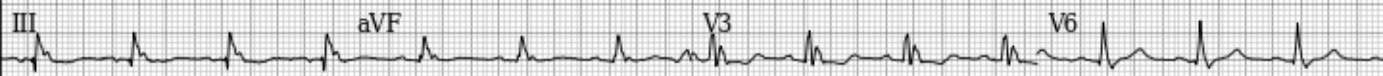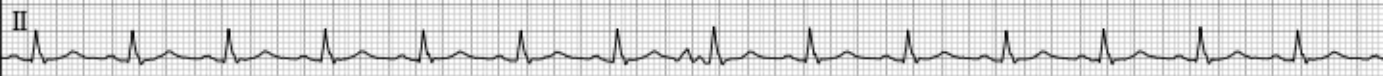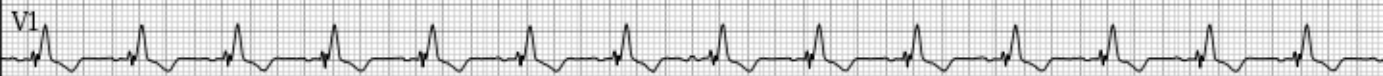



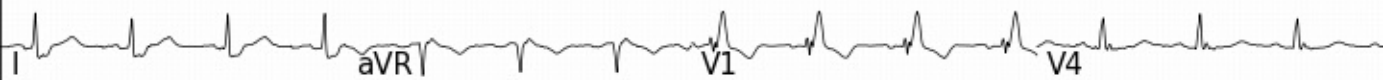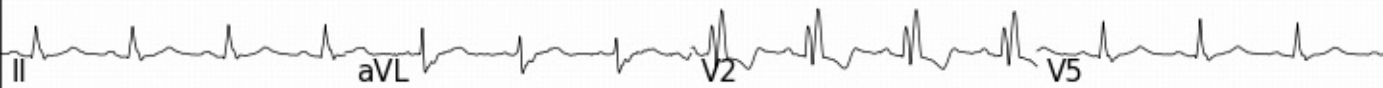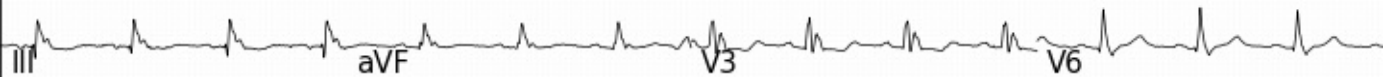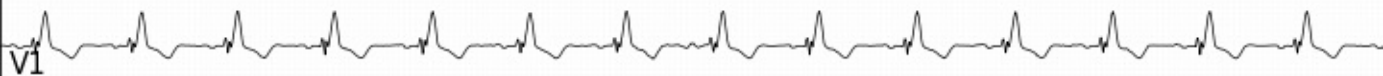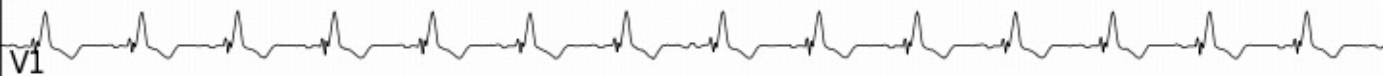

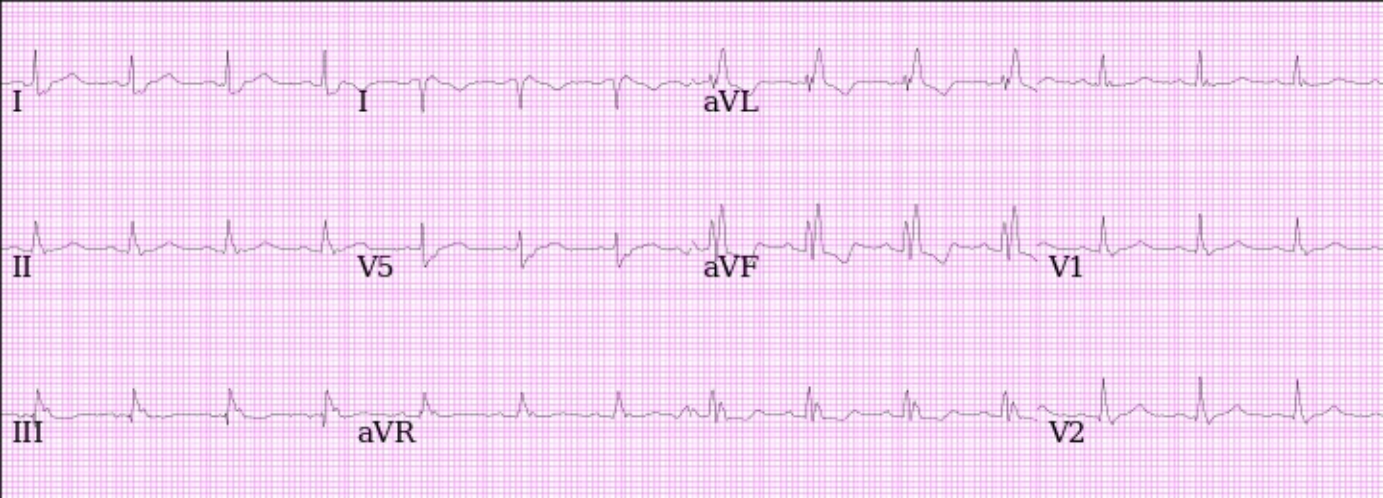

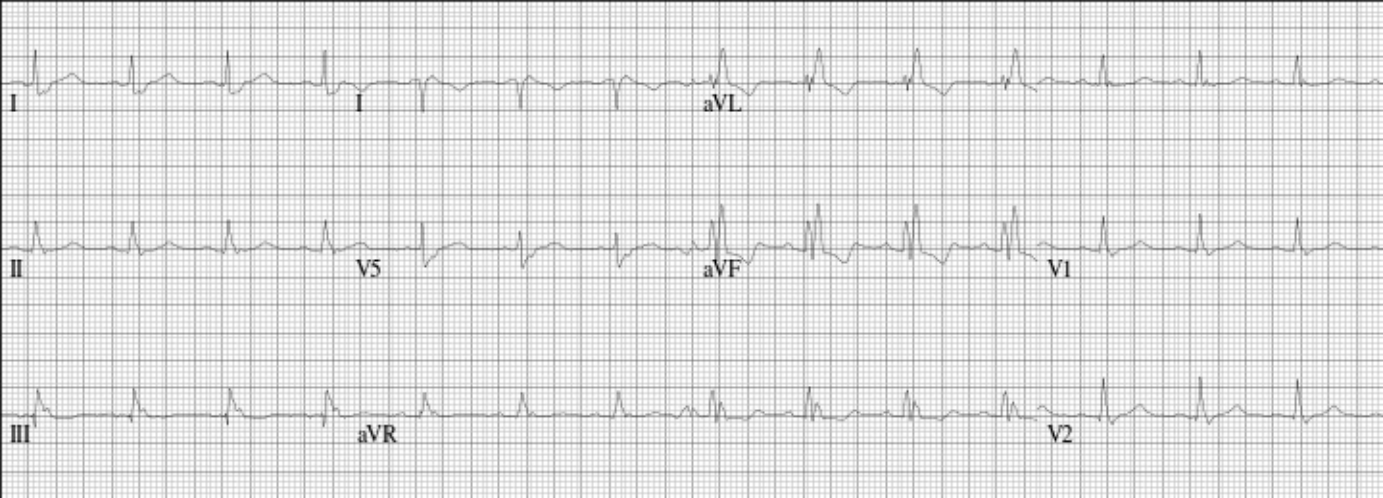

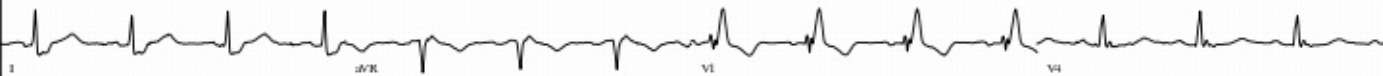

aVR

V1

V4

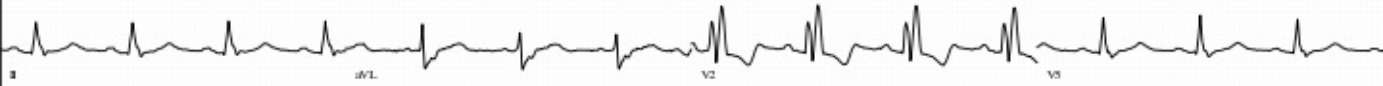

aVL

V2

V5

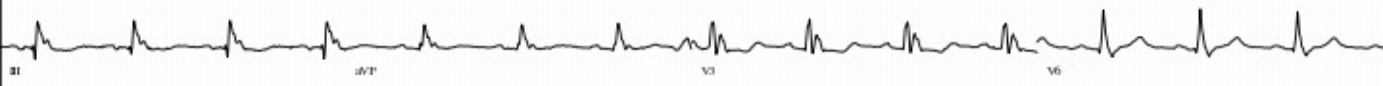

aVF

V3

V6

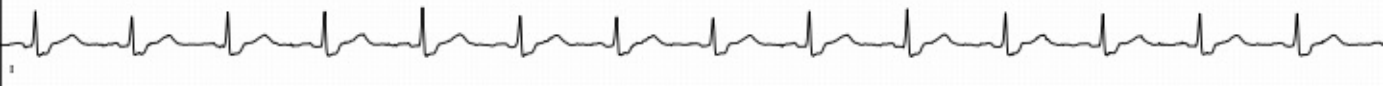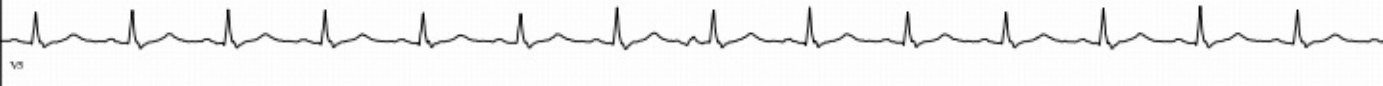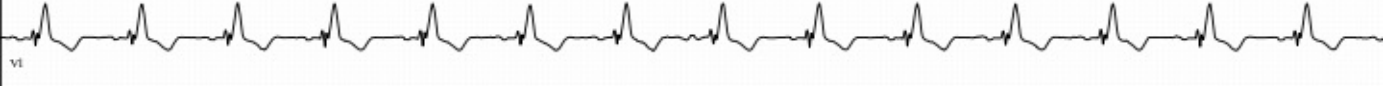

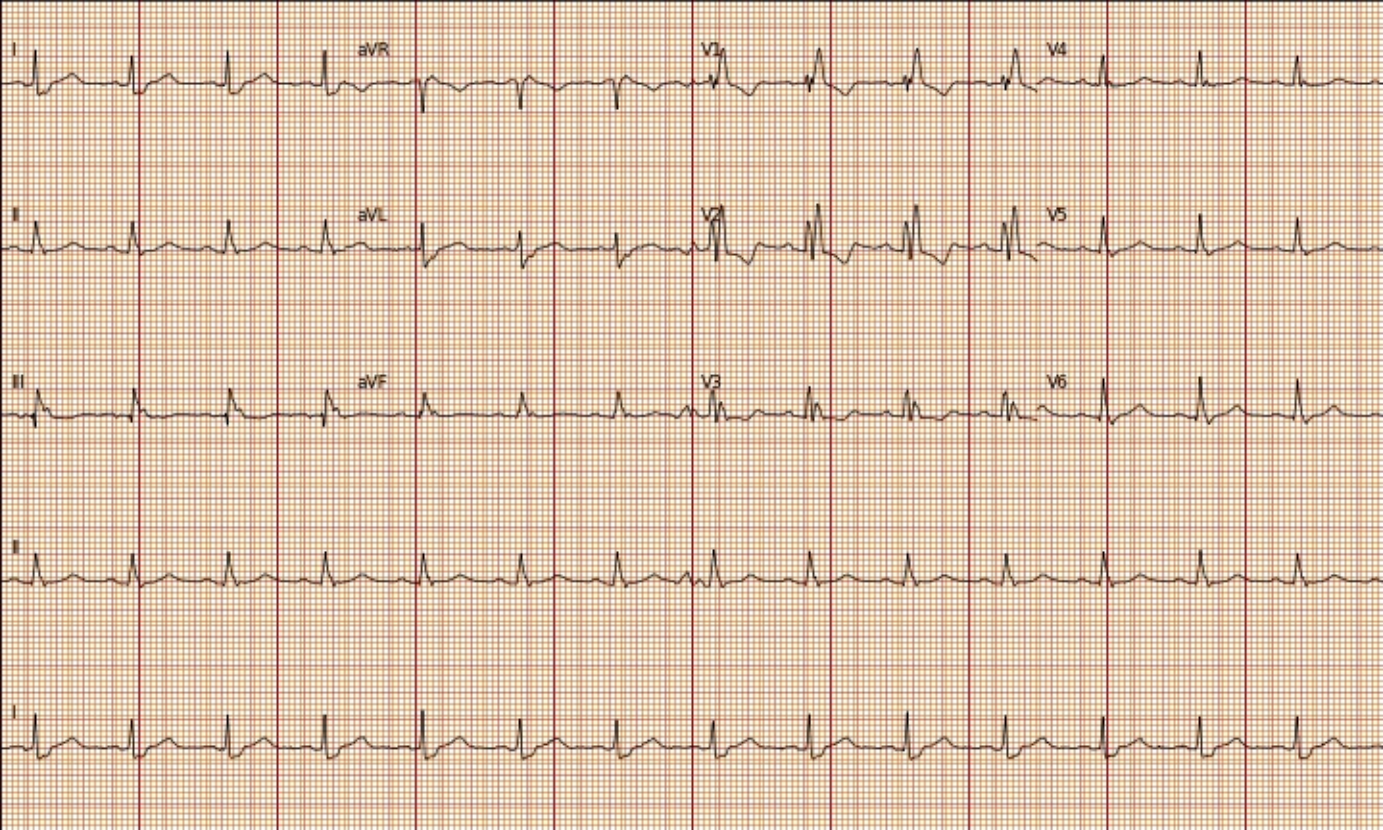



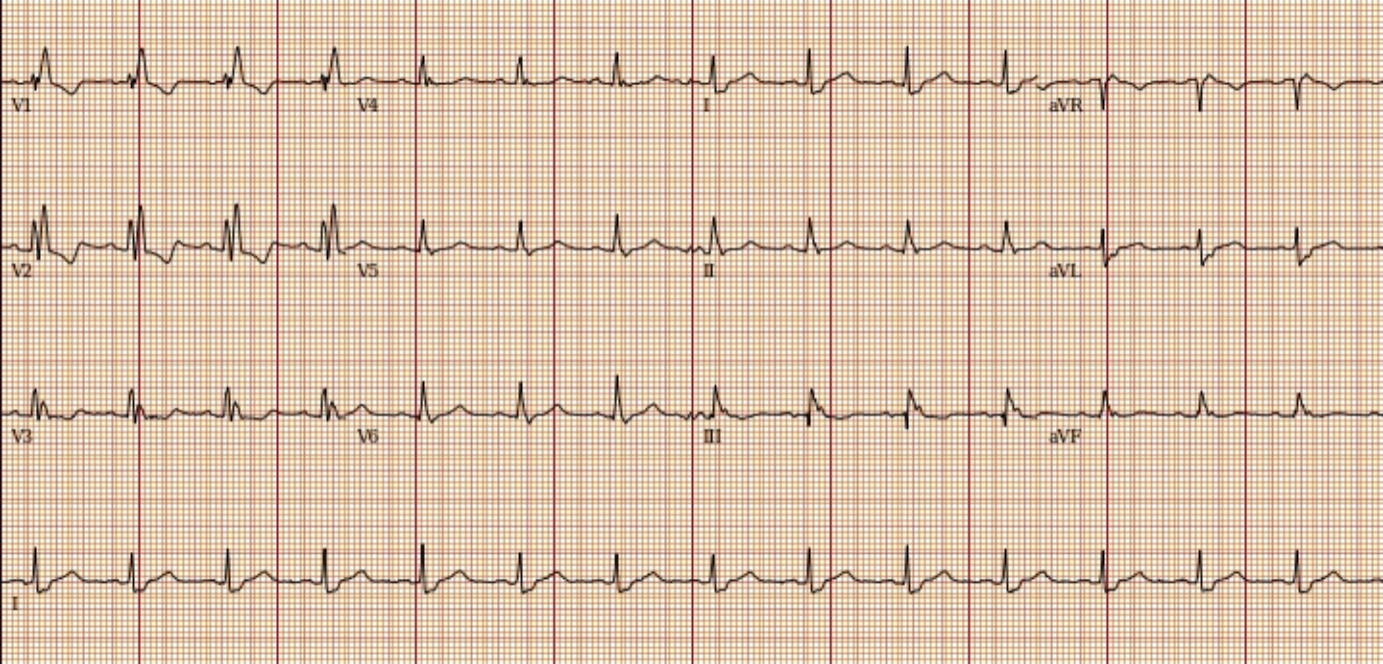

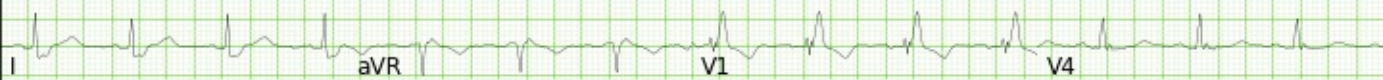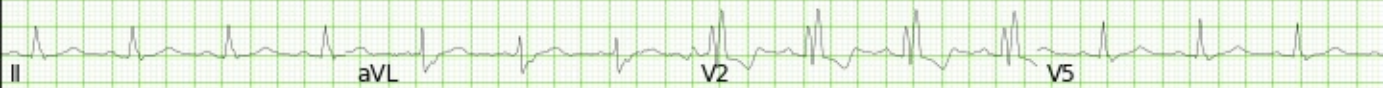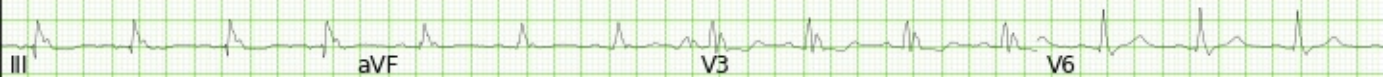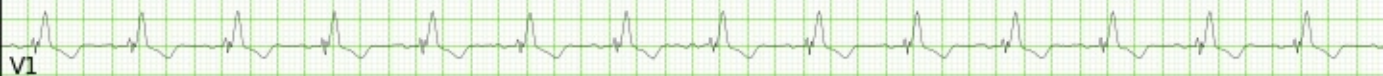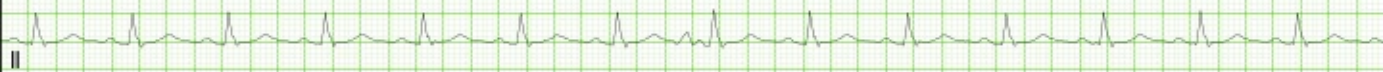

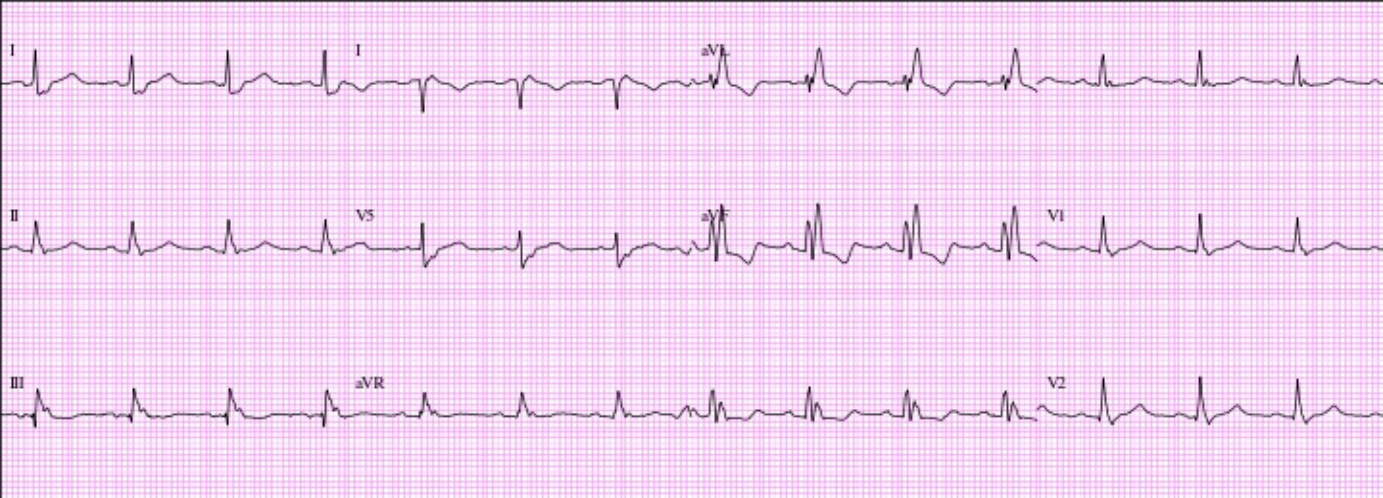



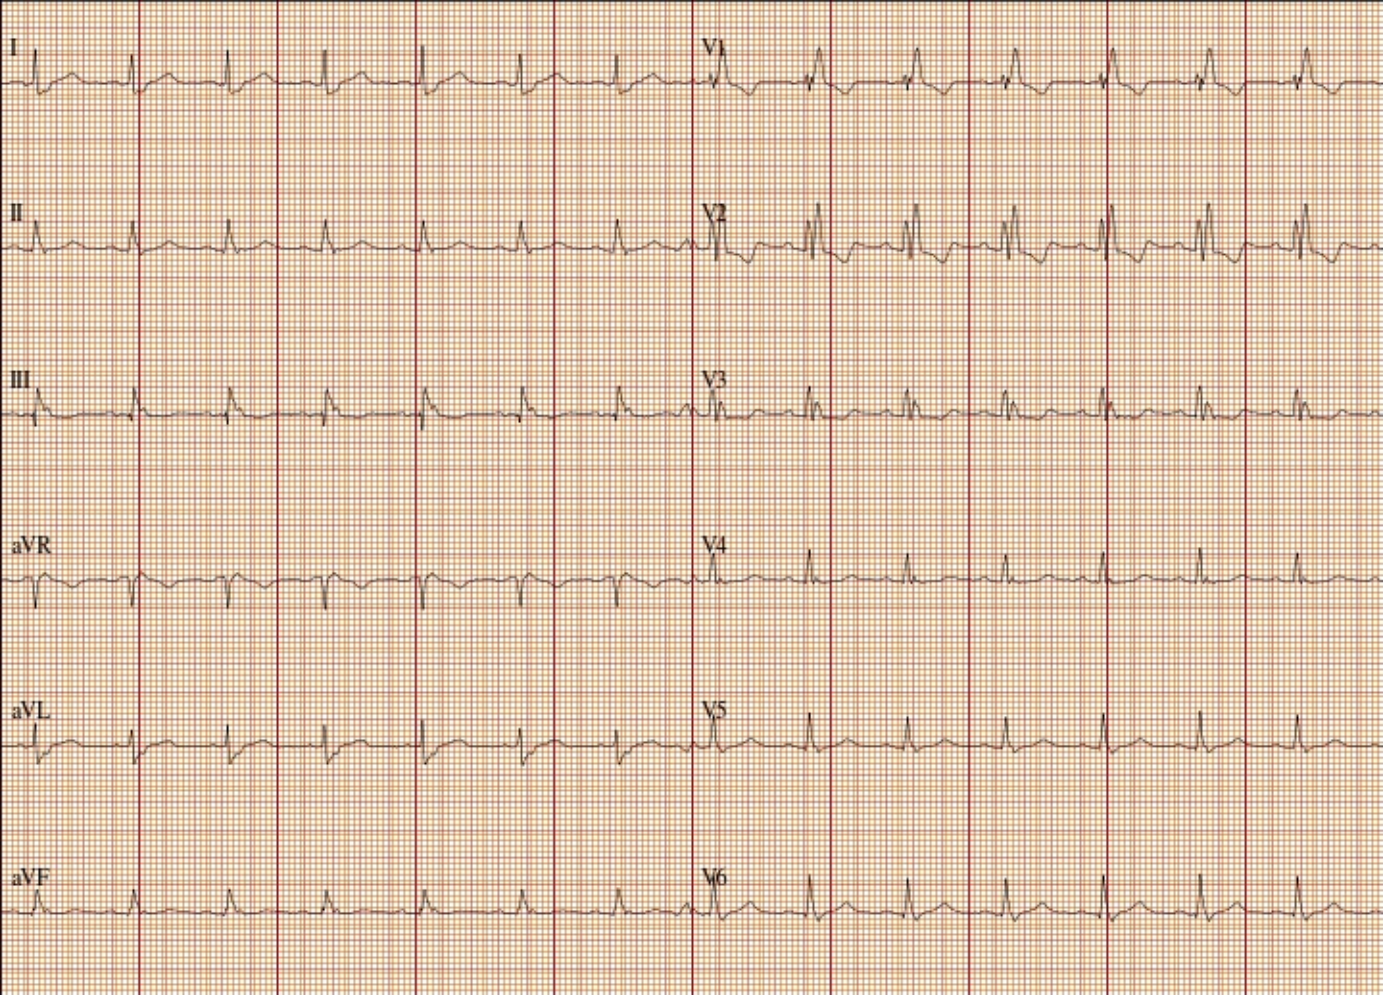

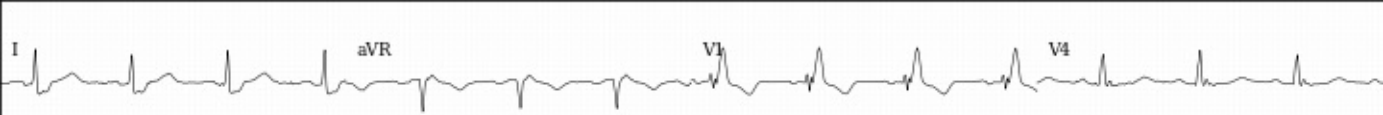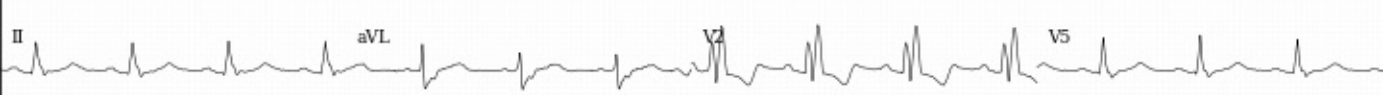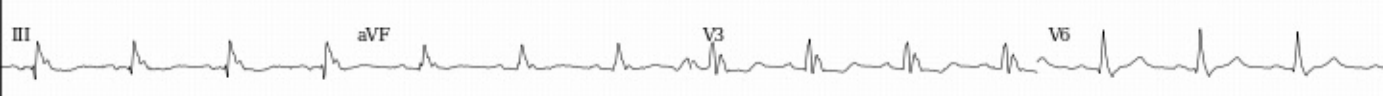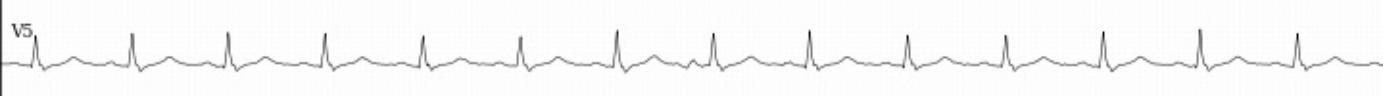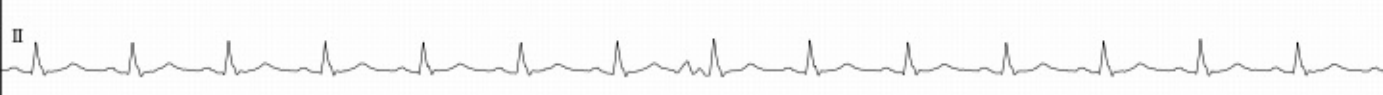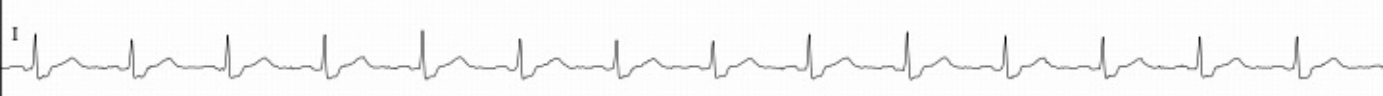

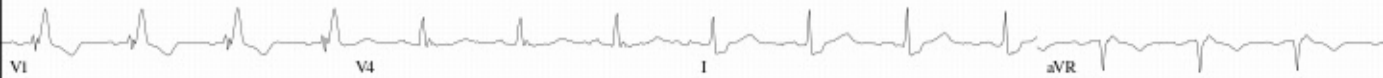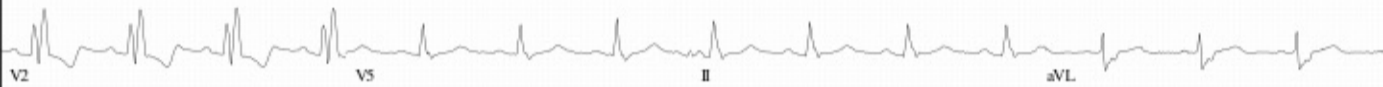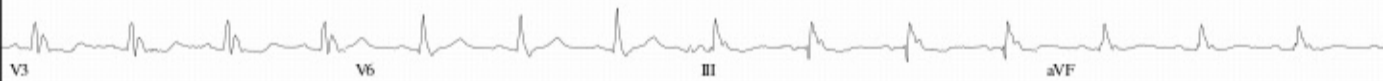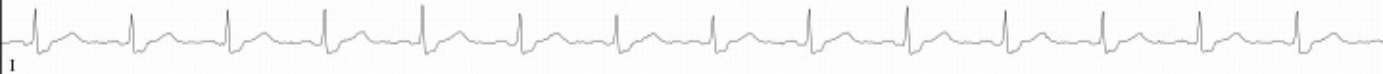

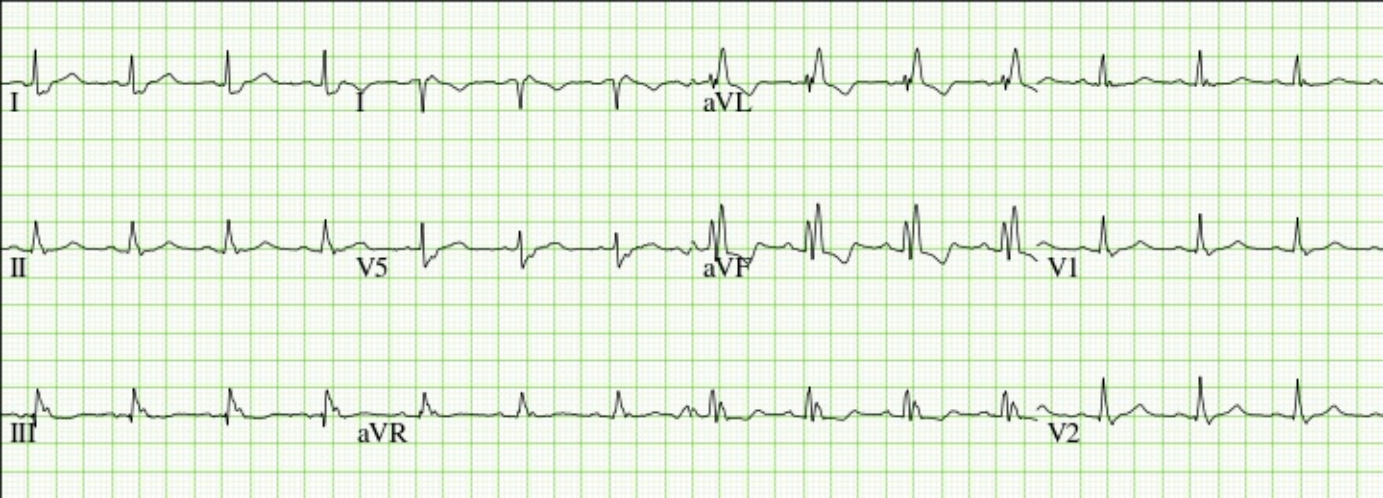

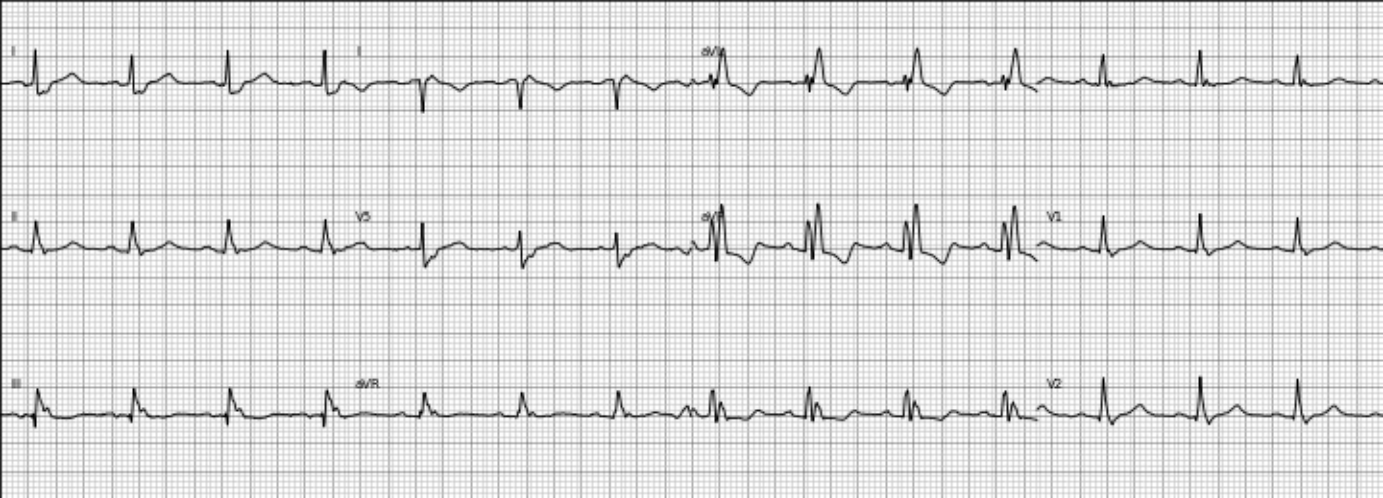



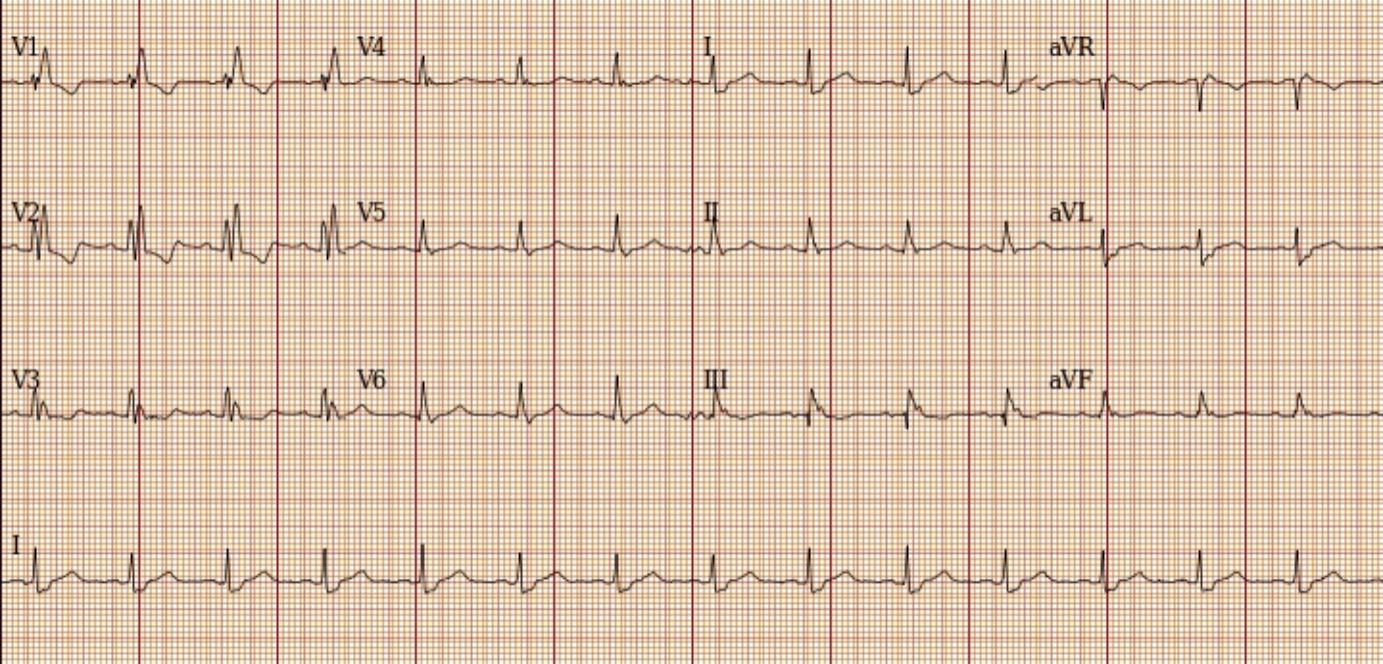

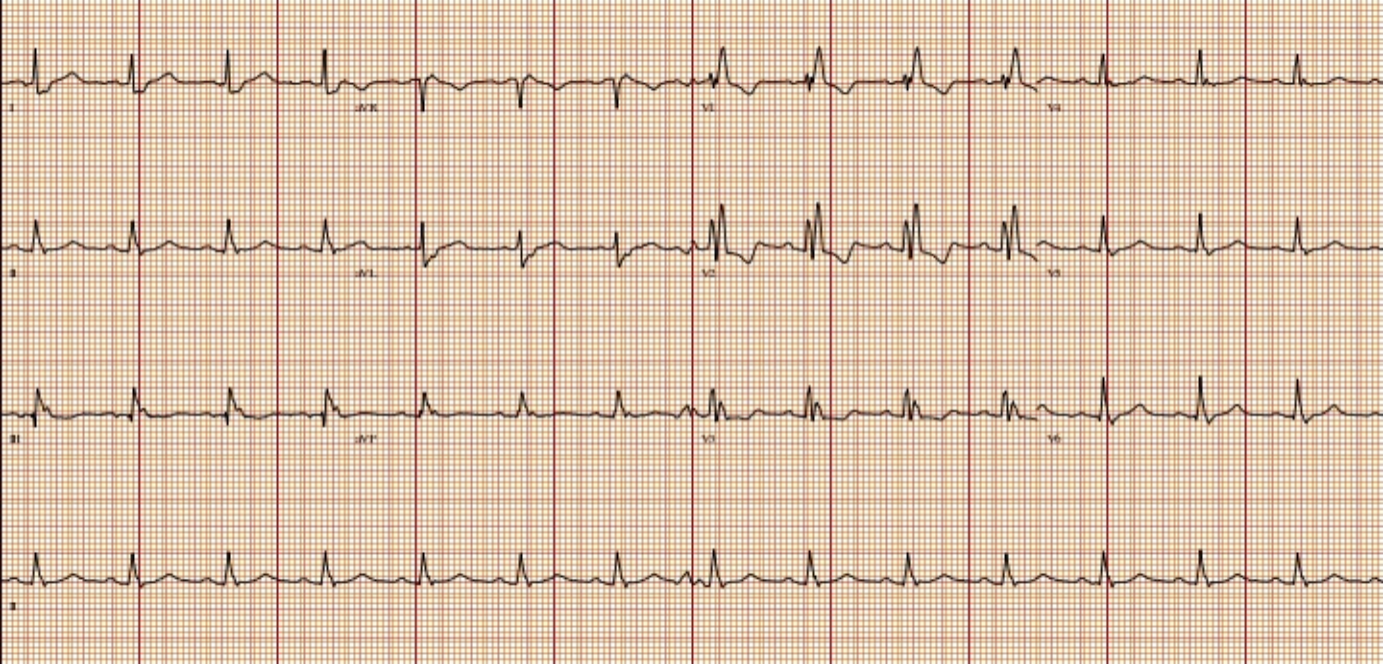

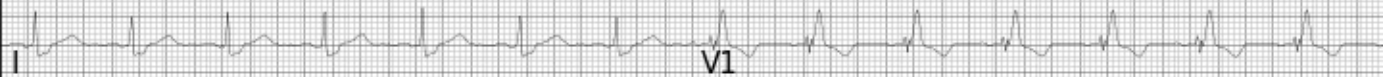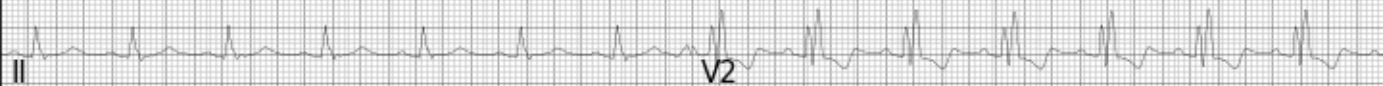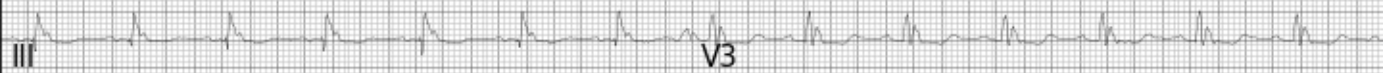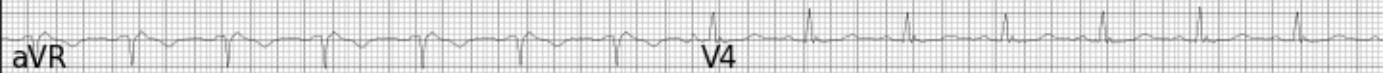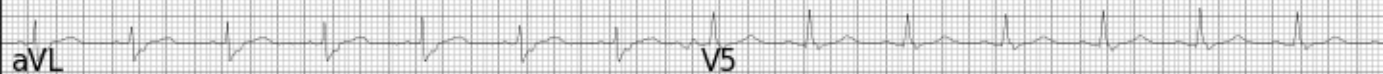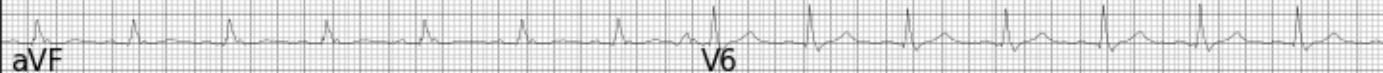



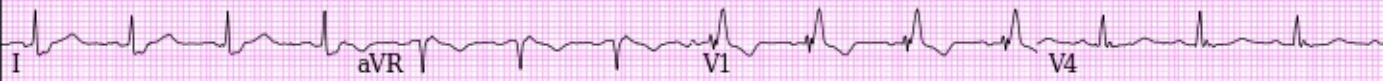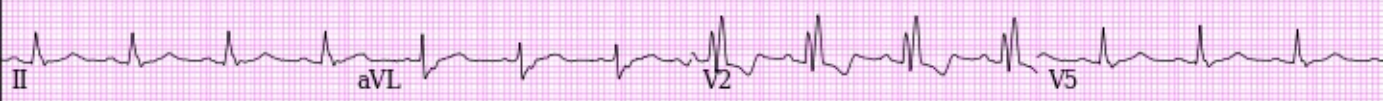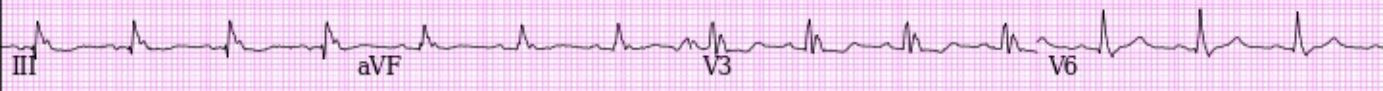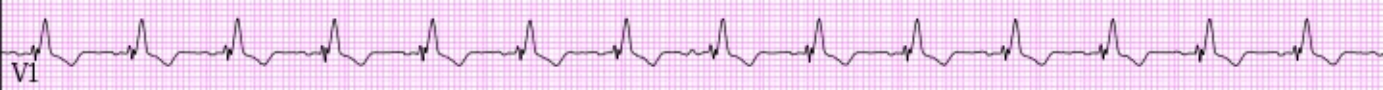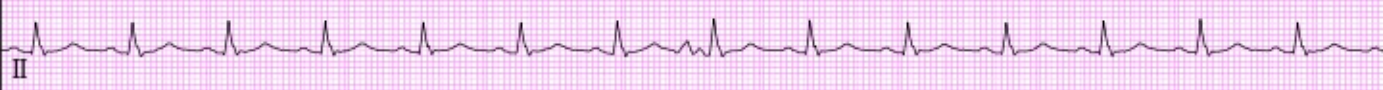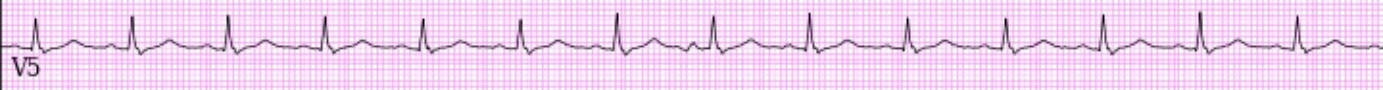

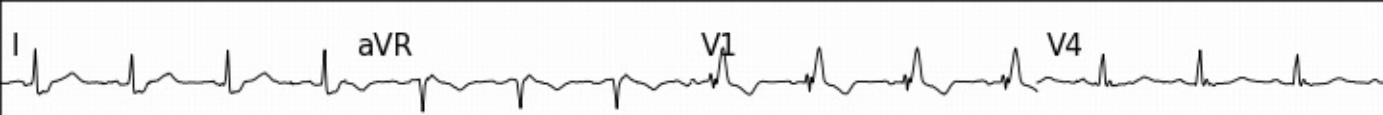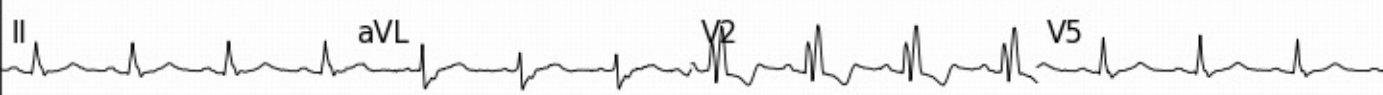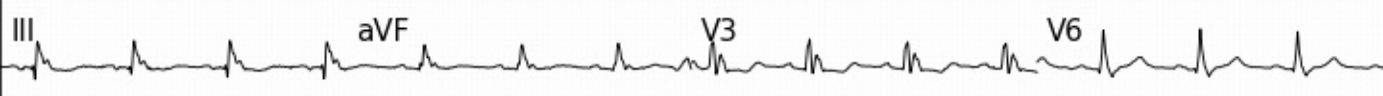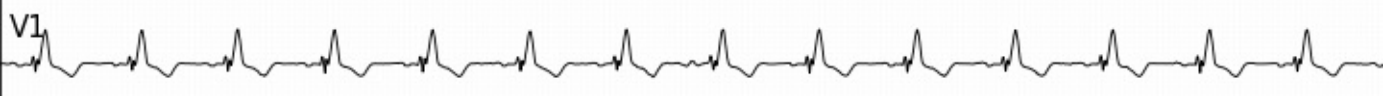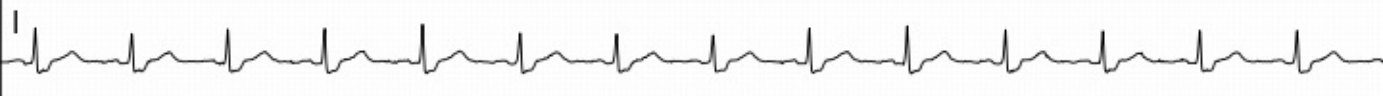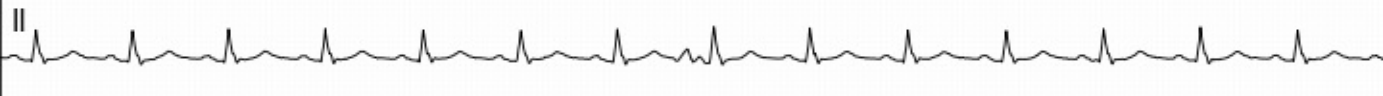



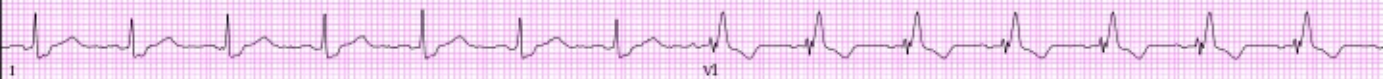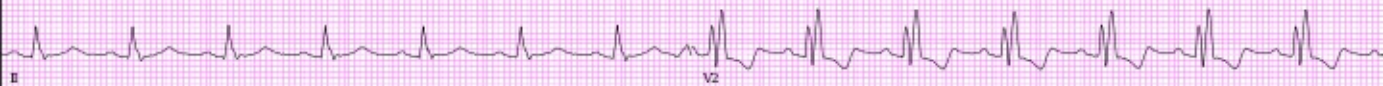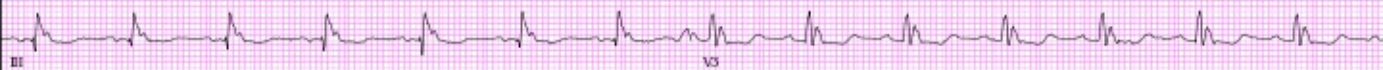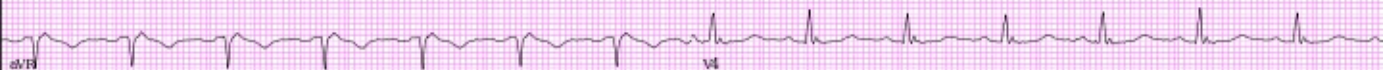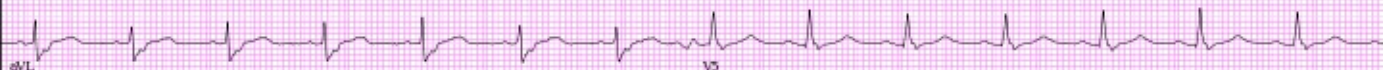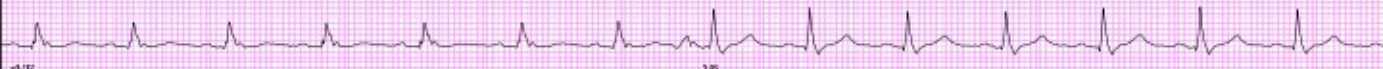

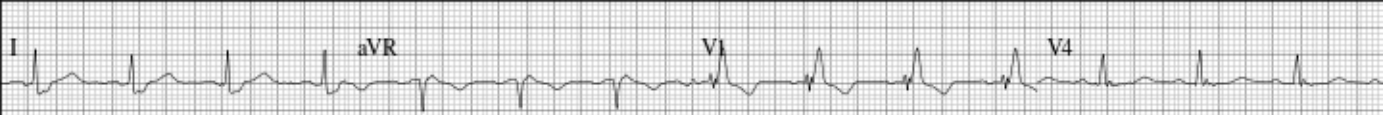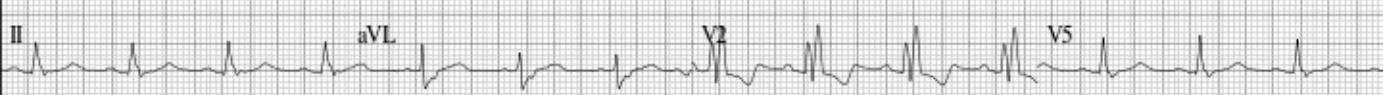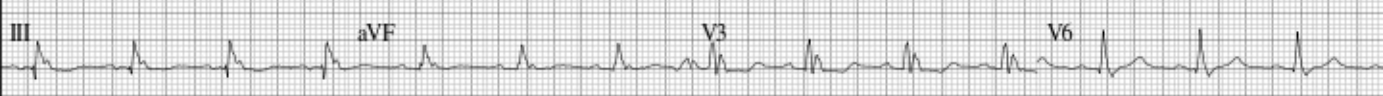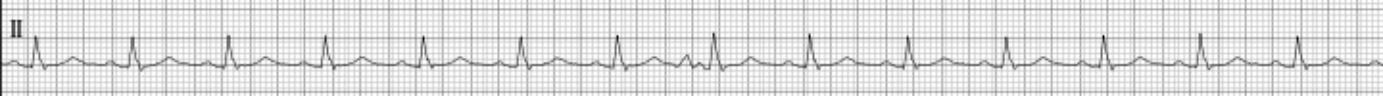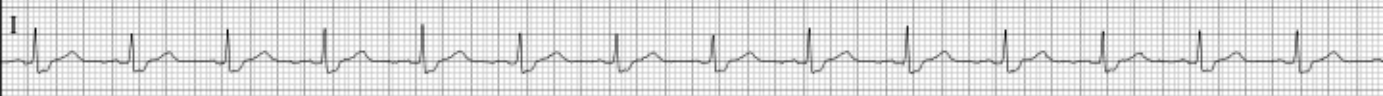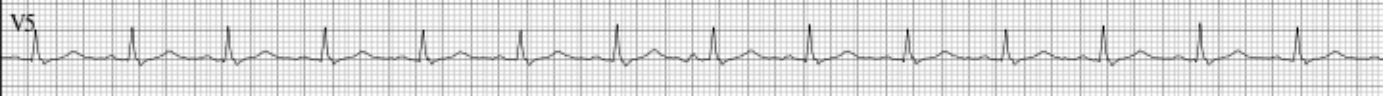

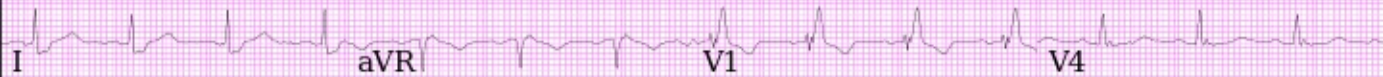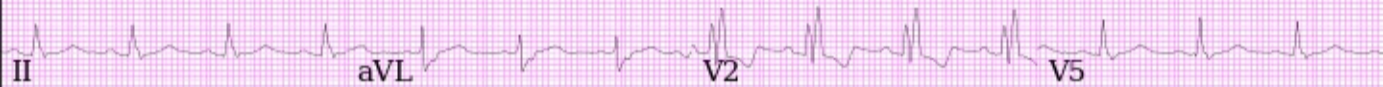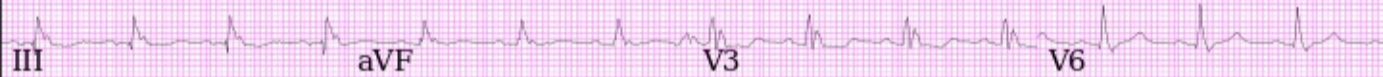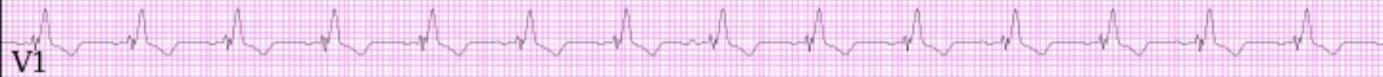



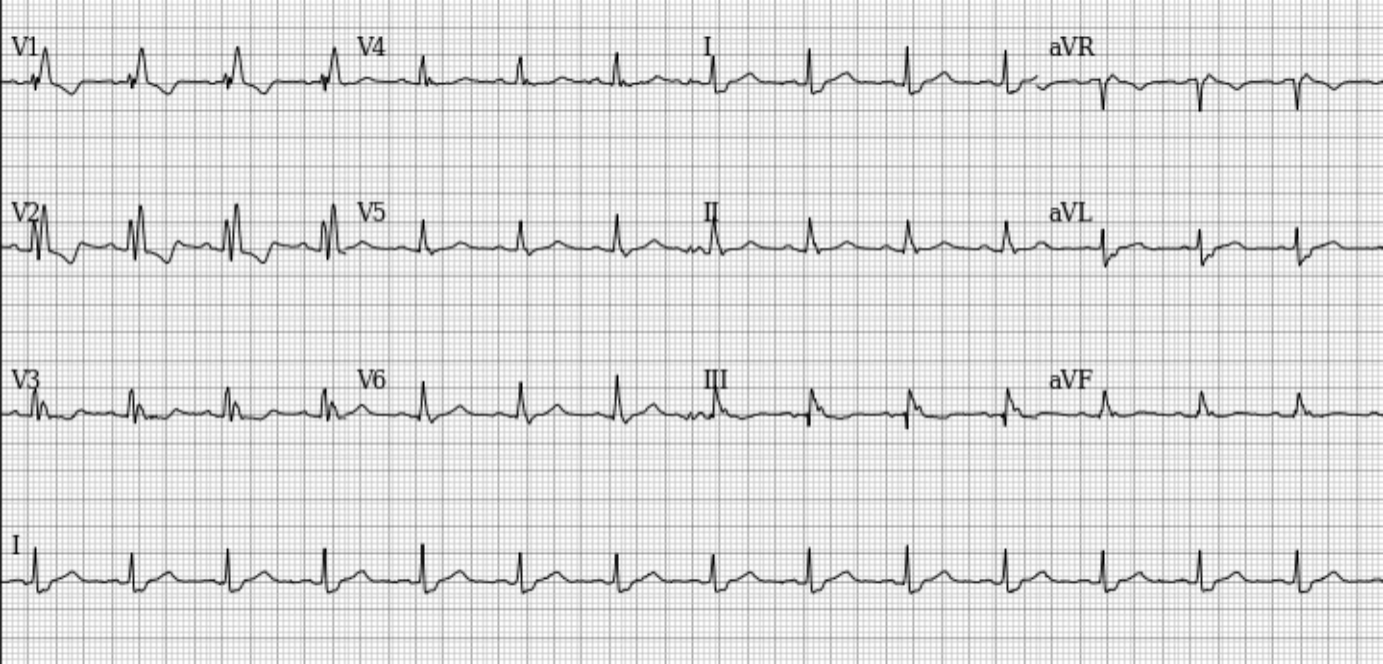

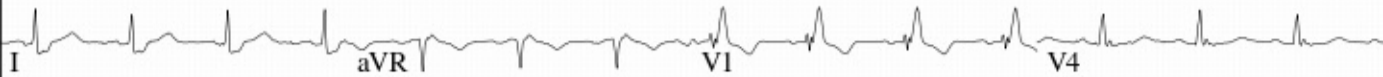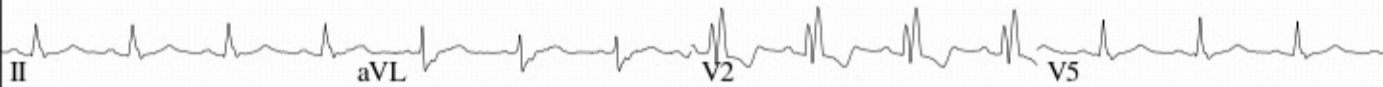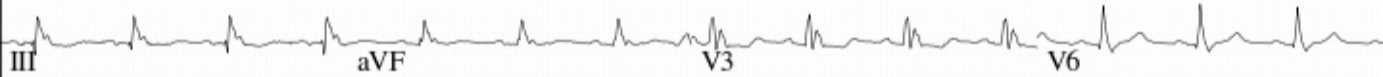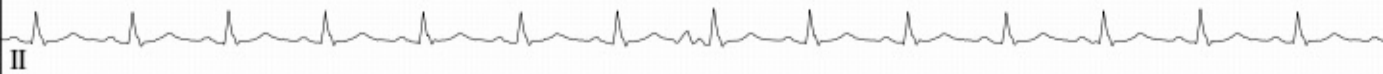

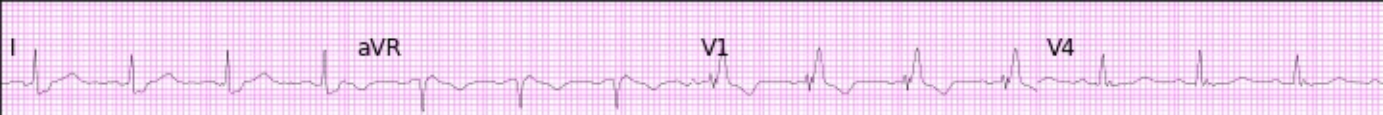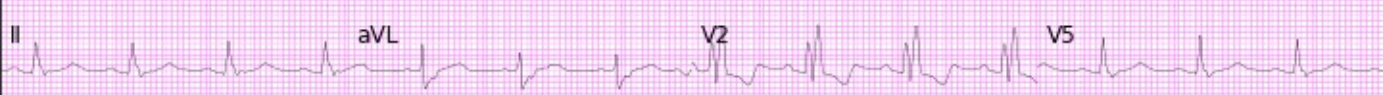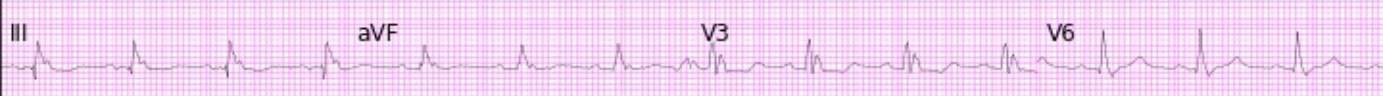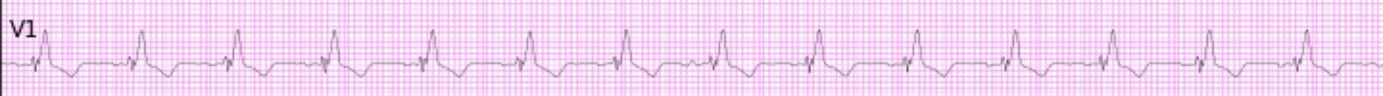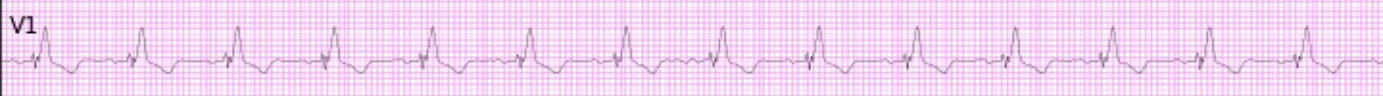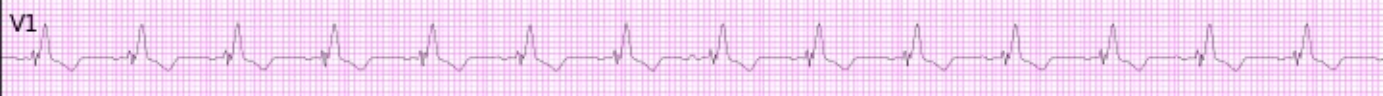



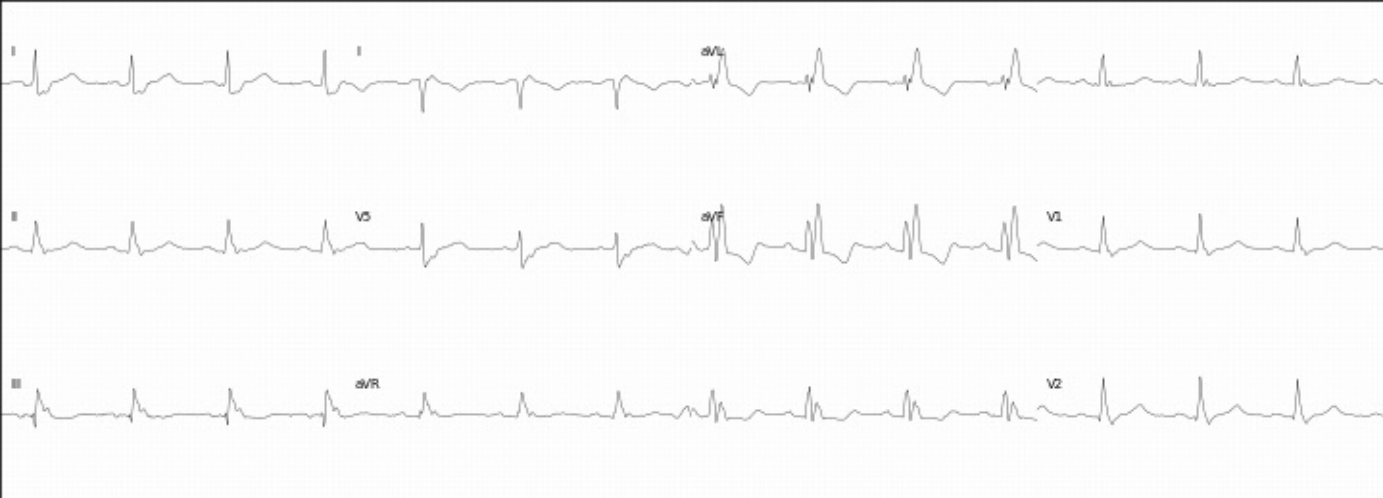

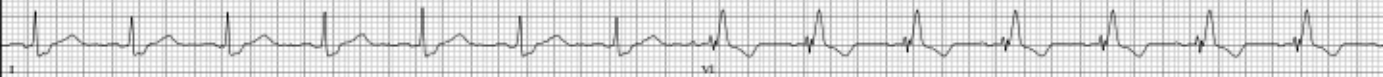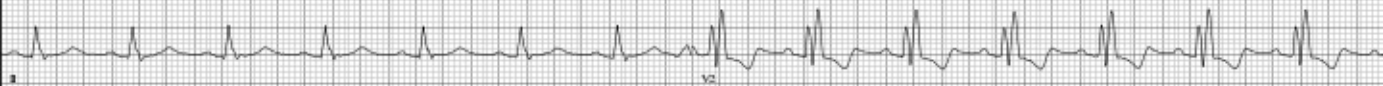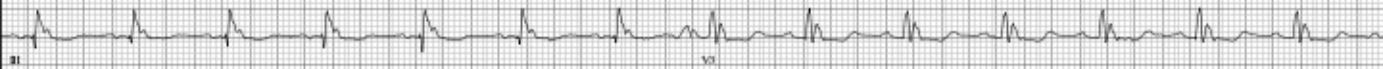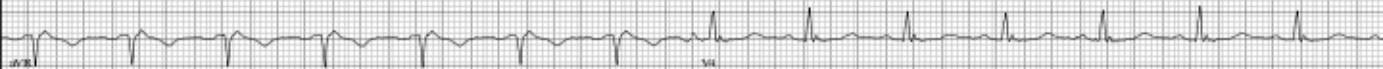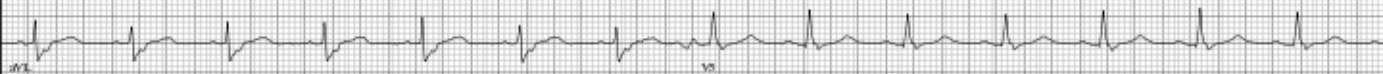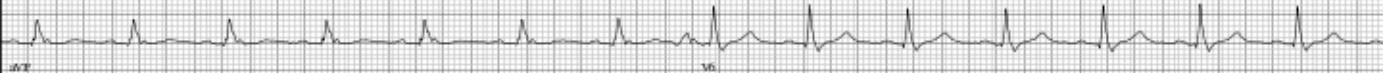

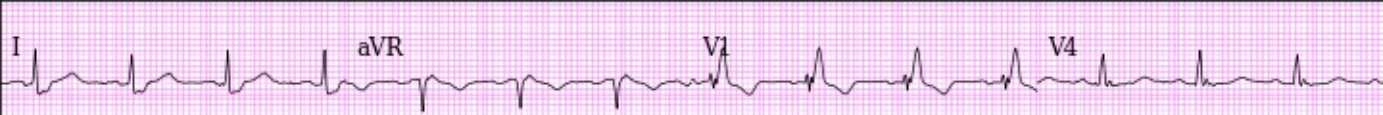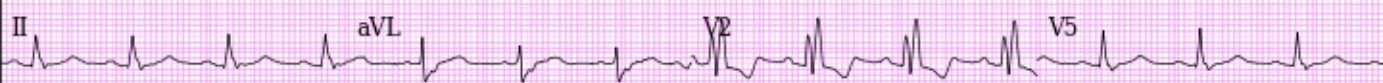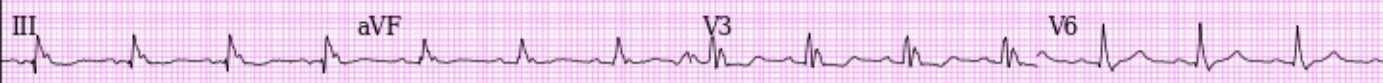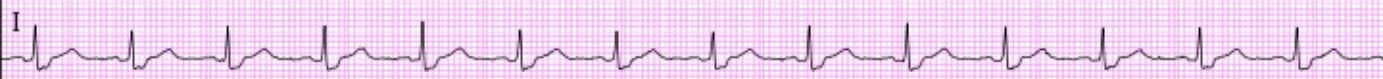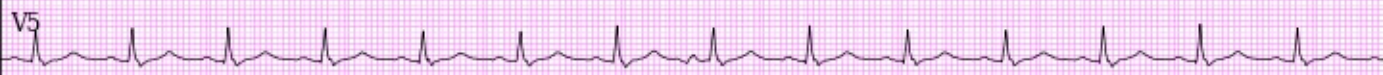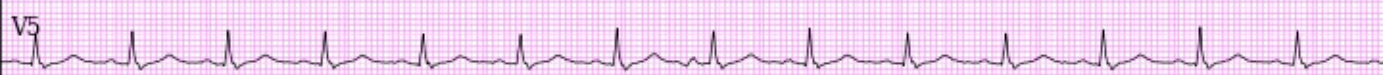



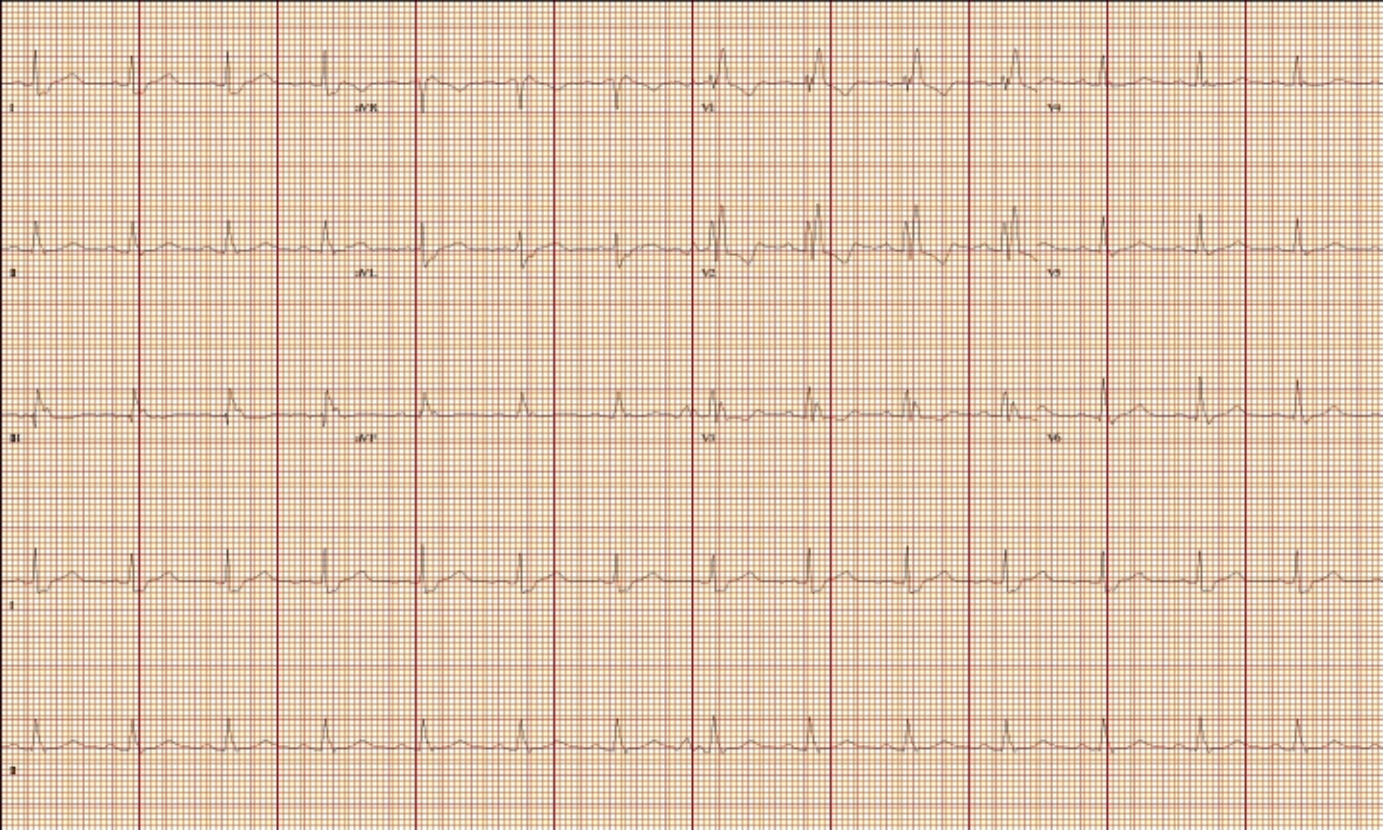



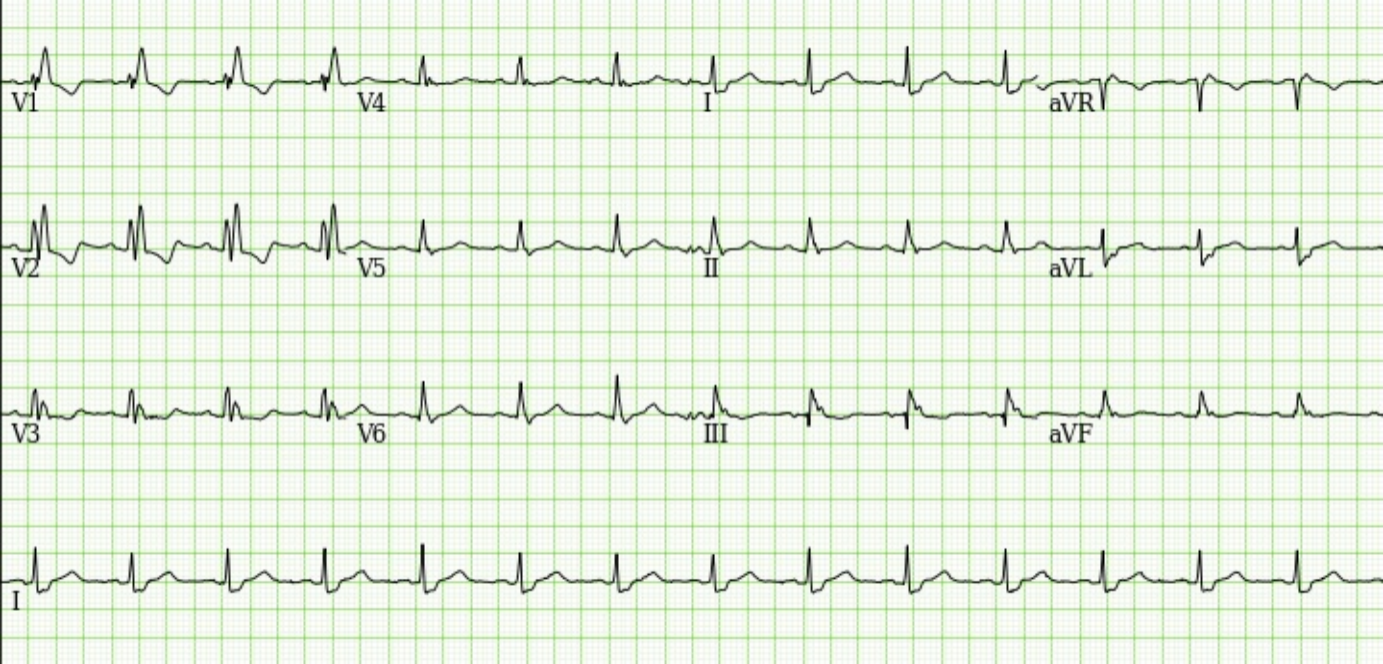

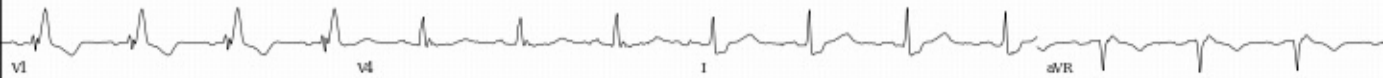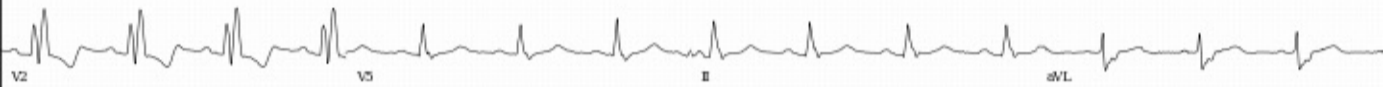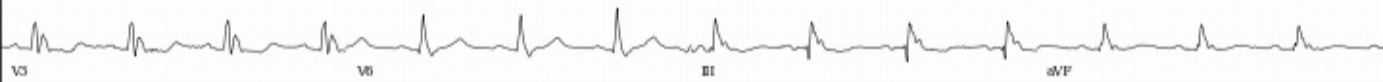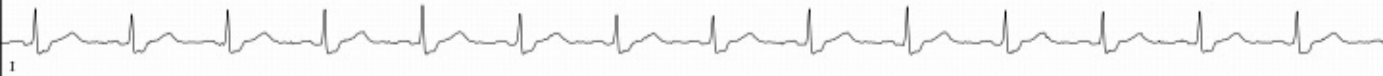

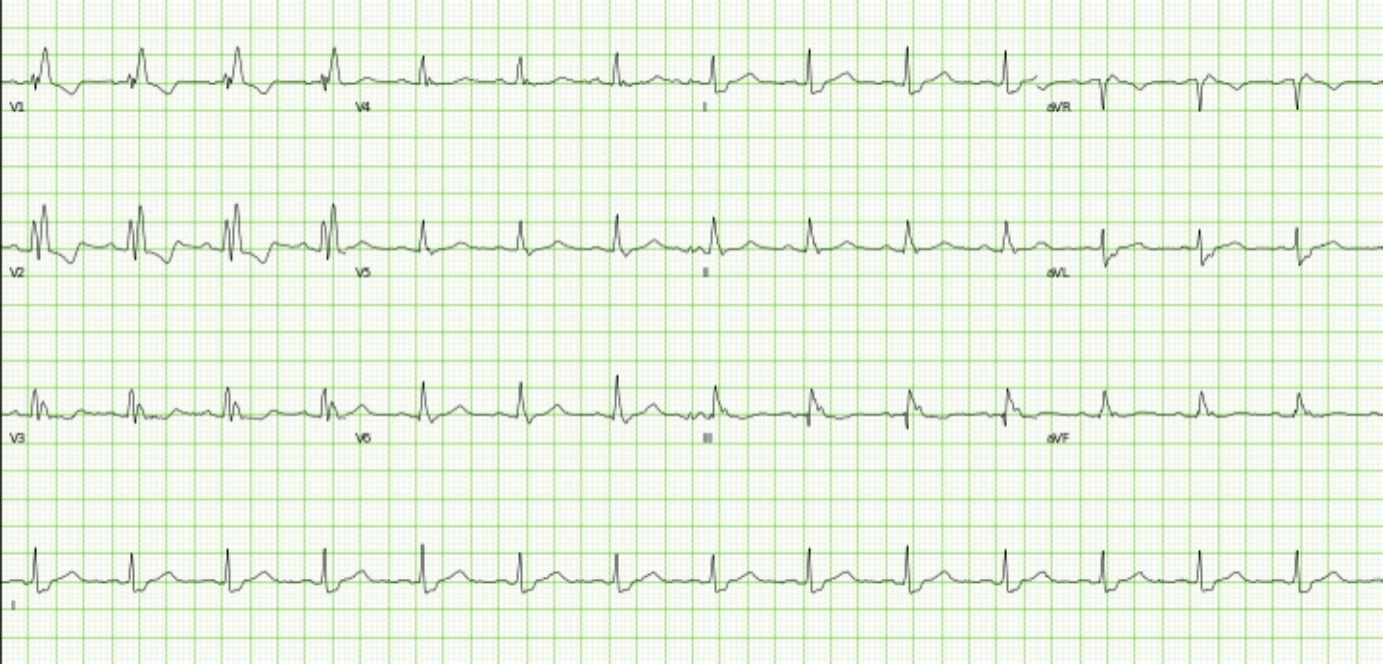





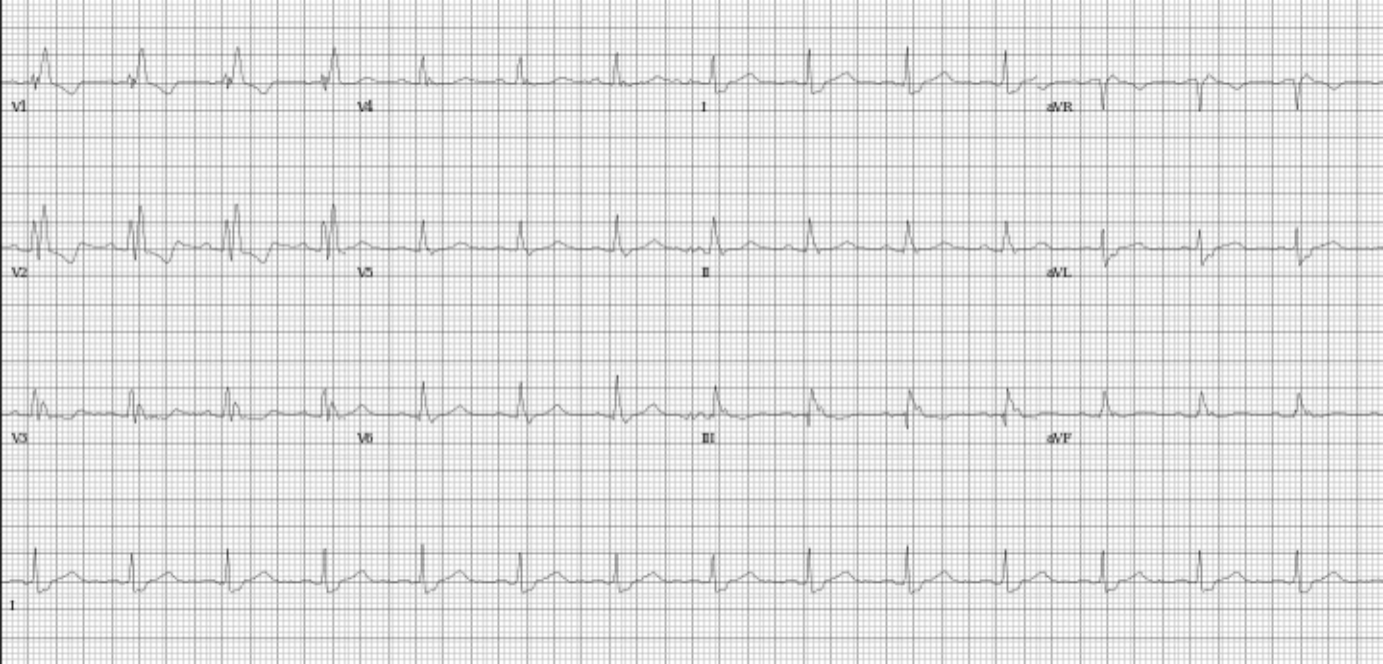

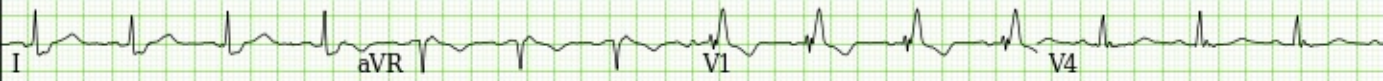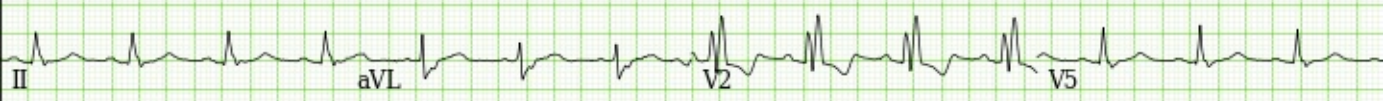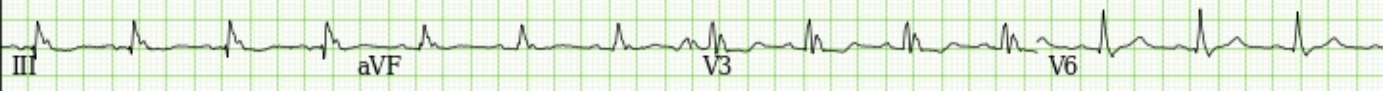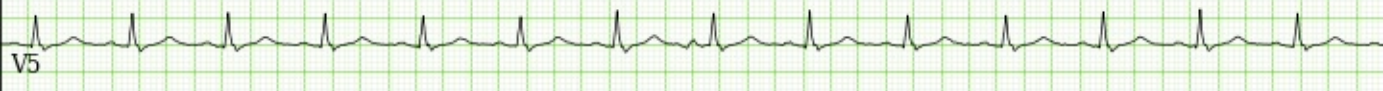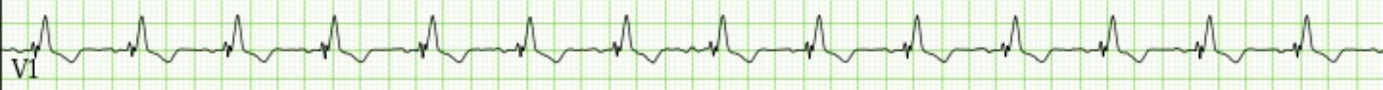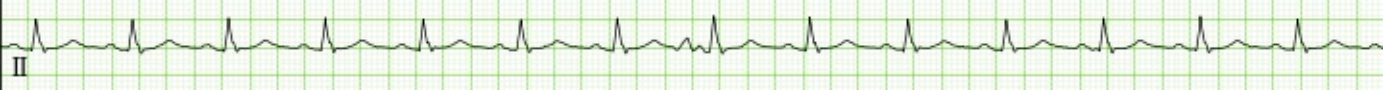



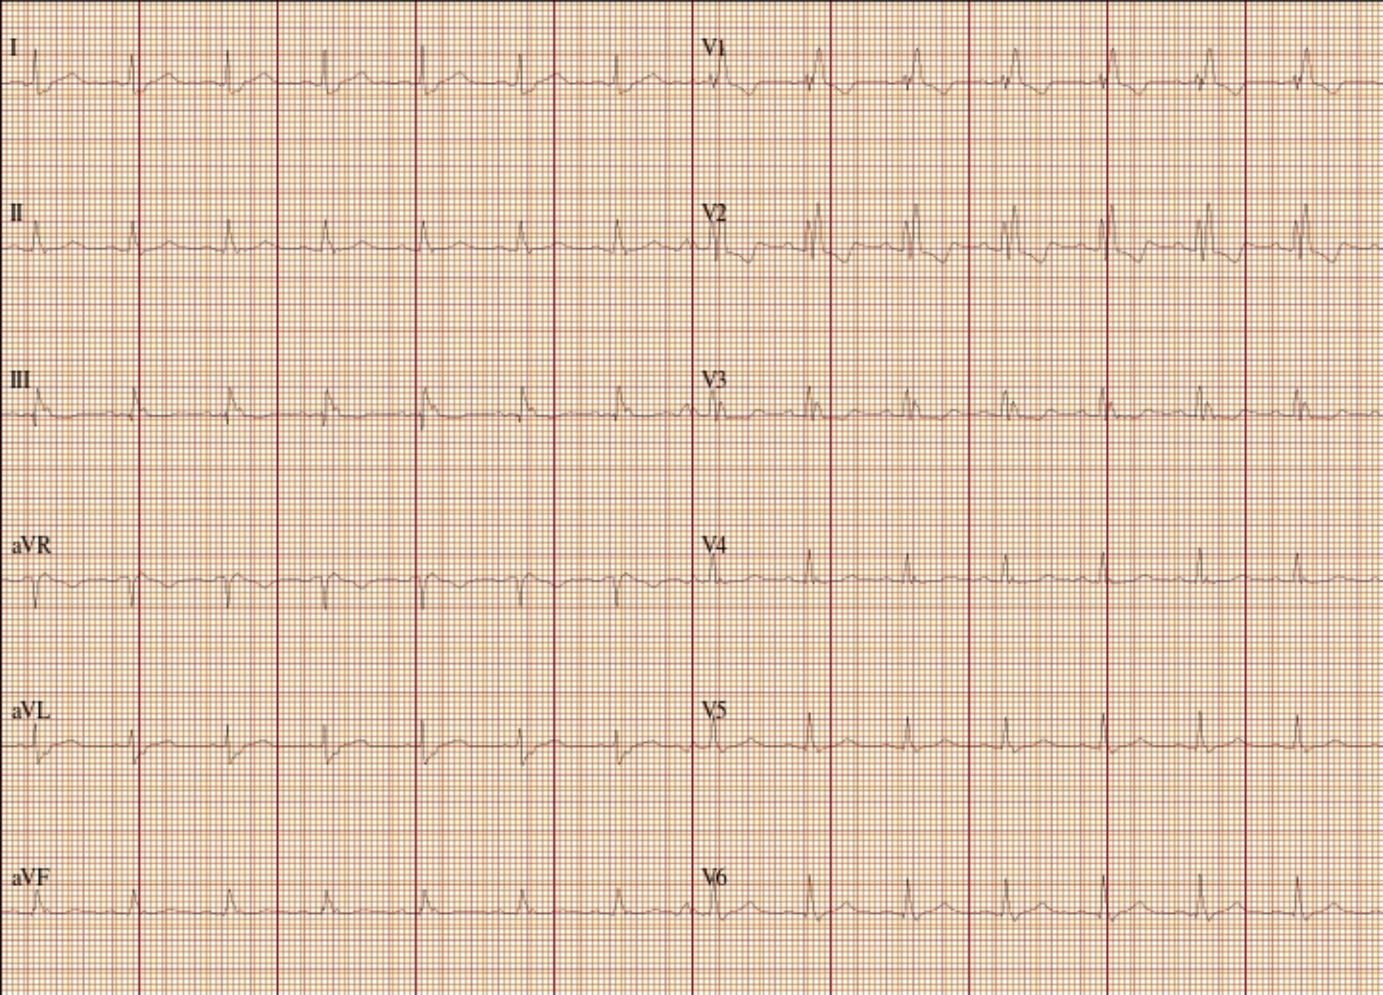

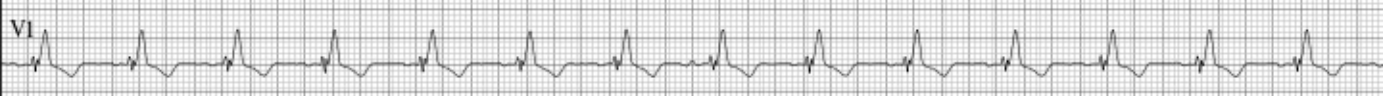



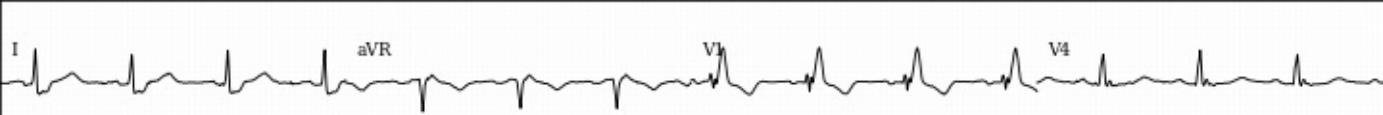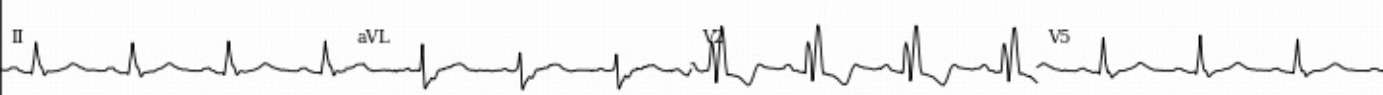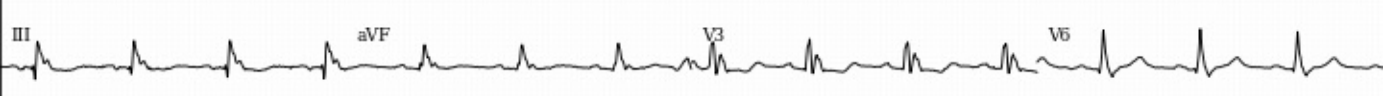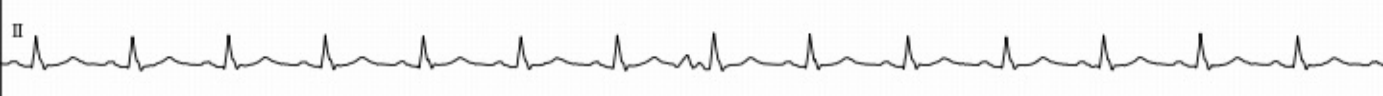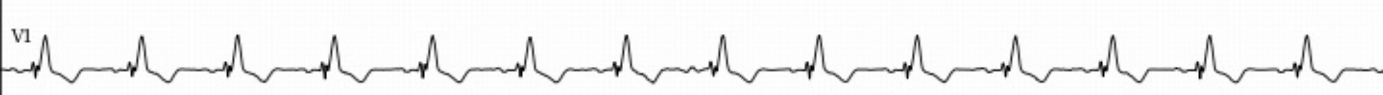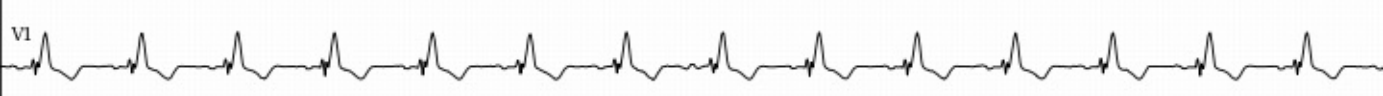

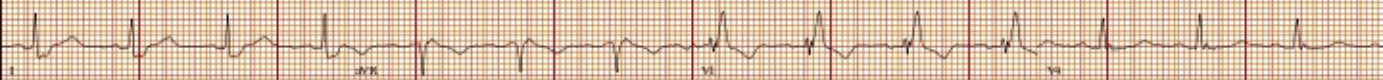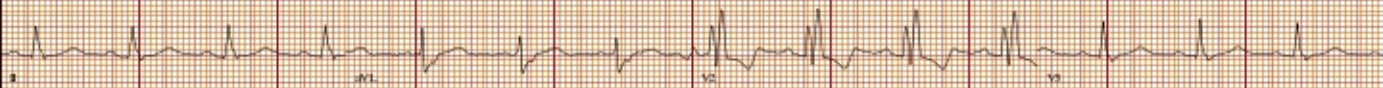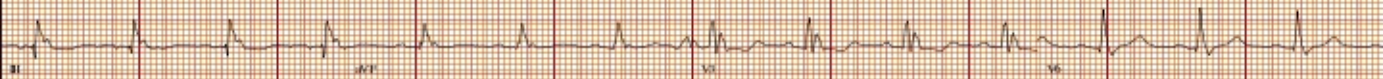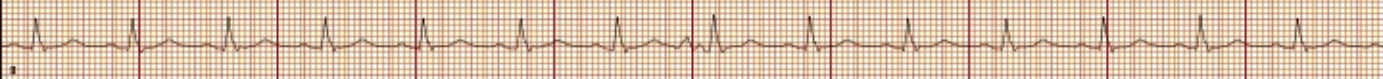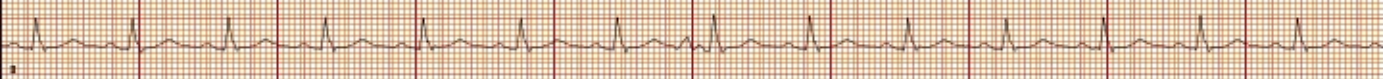



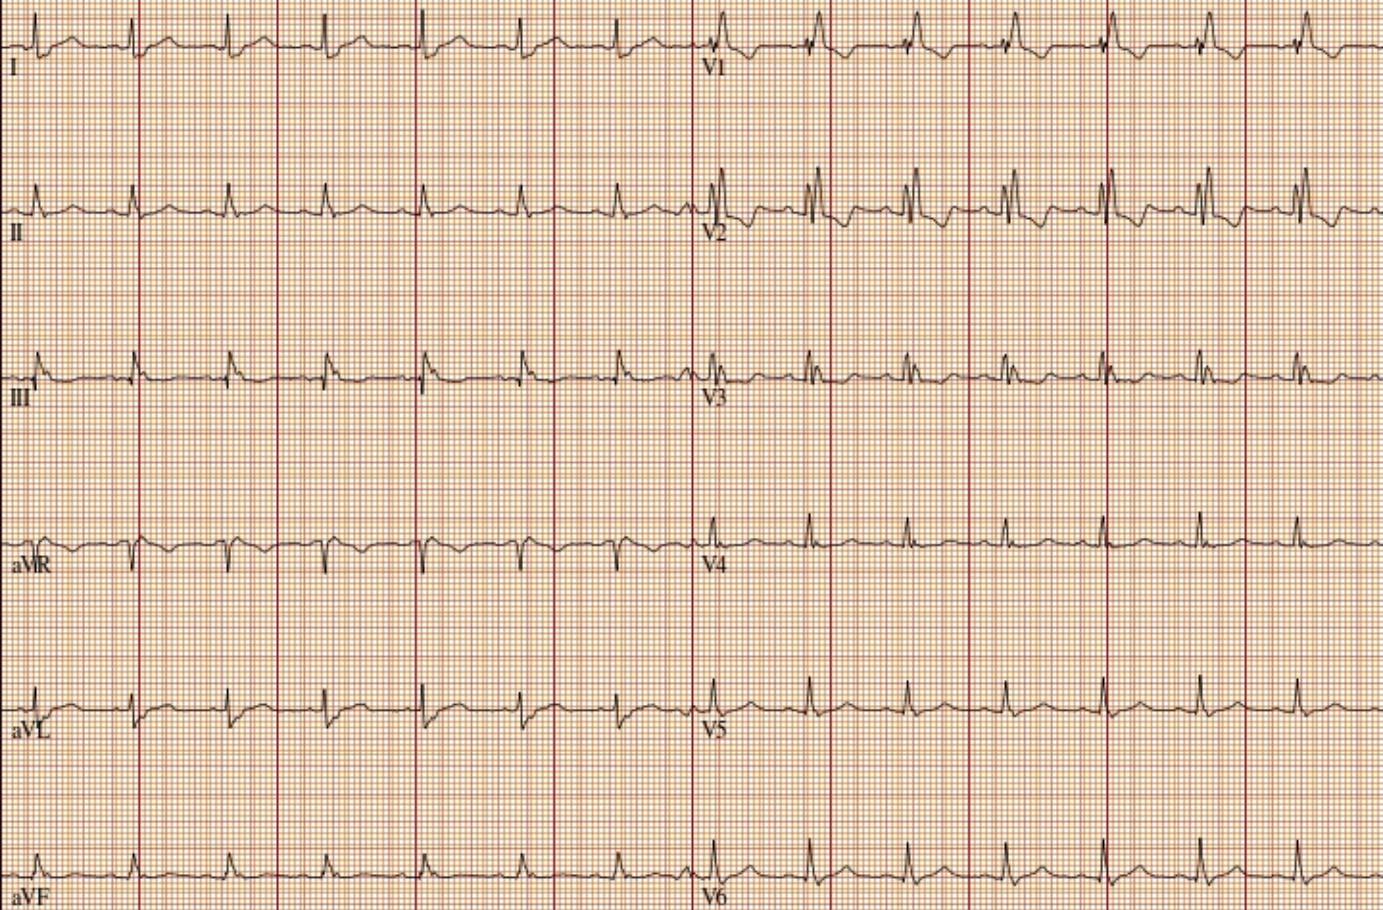



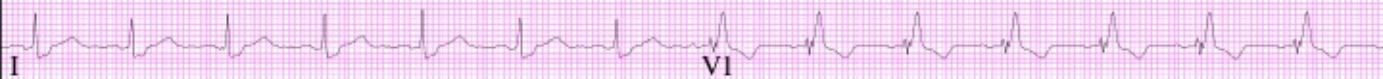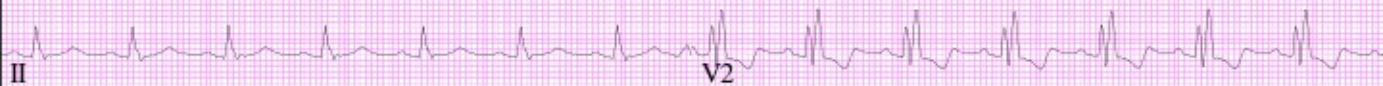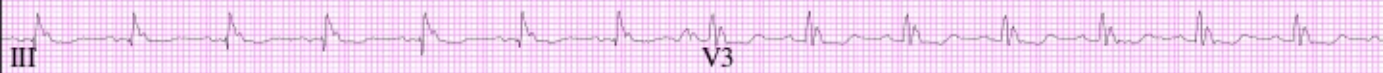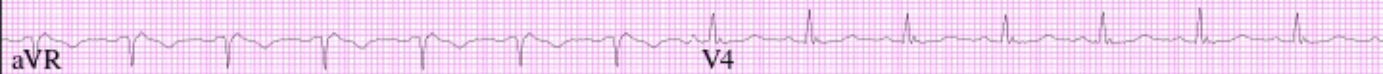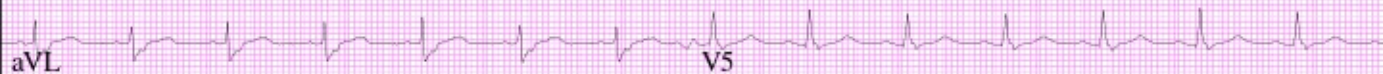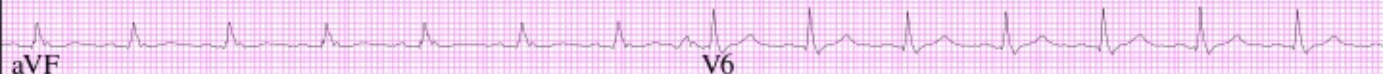



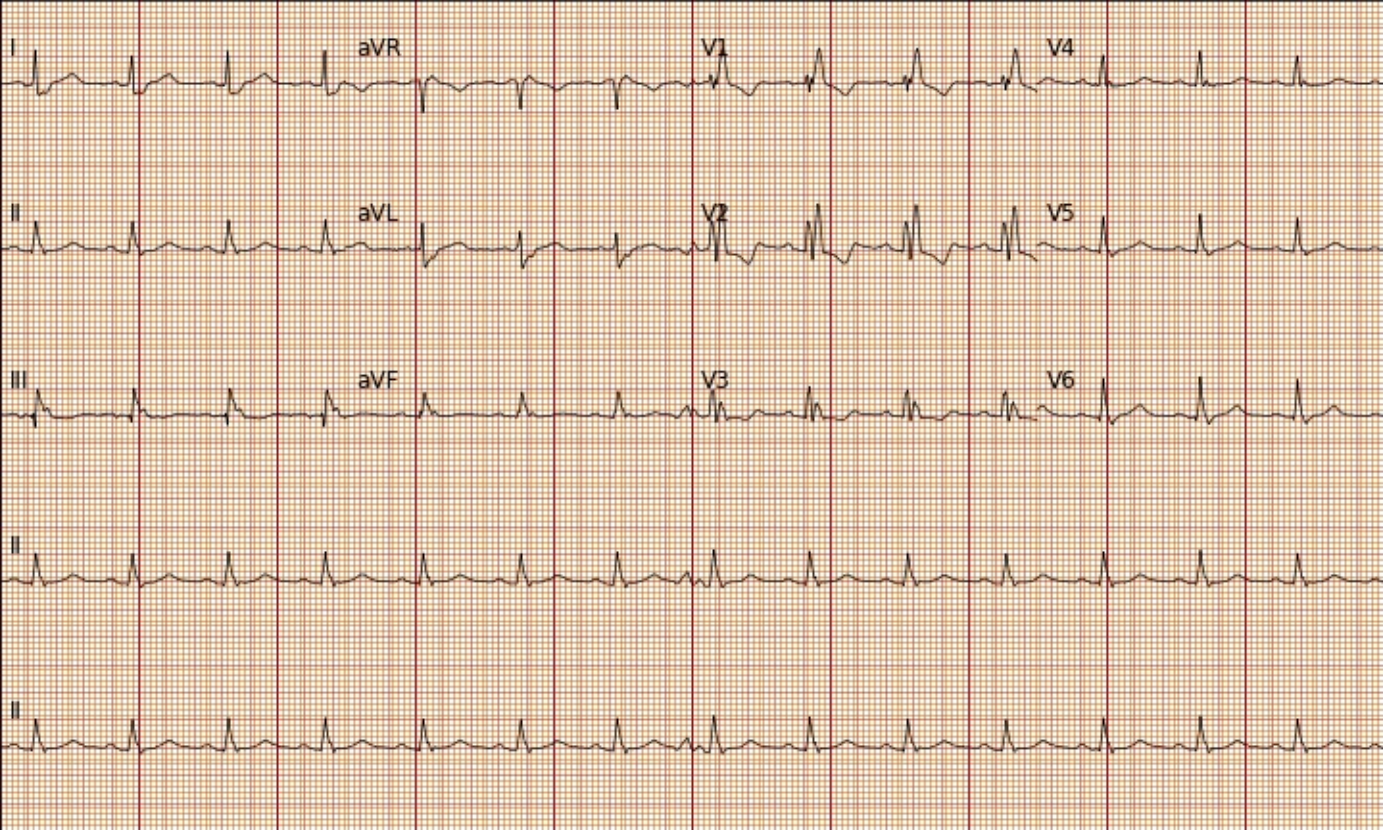

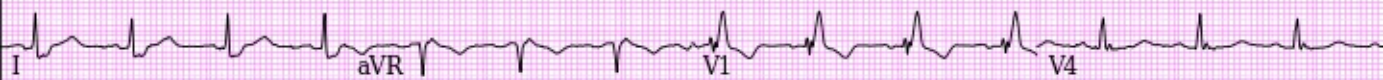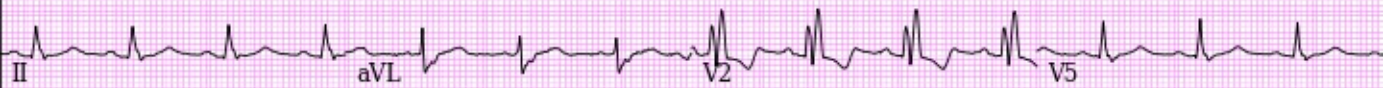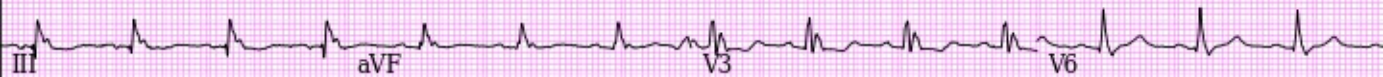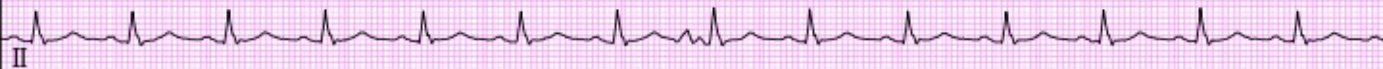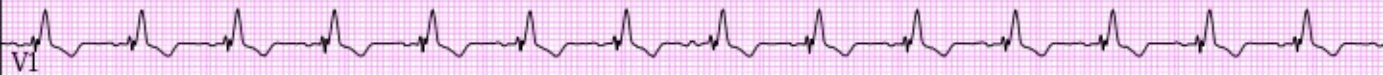

**Section 2. Random examples of 25 electrocardiogram images plotted in standard clinical layout used during model evaluation**



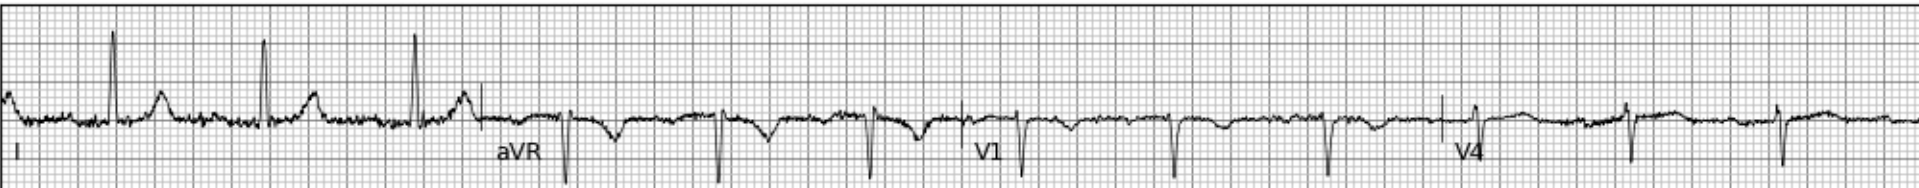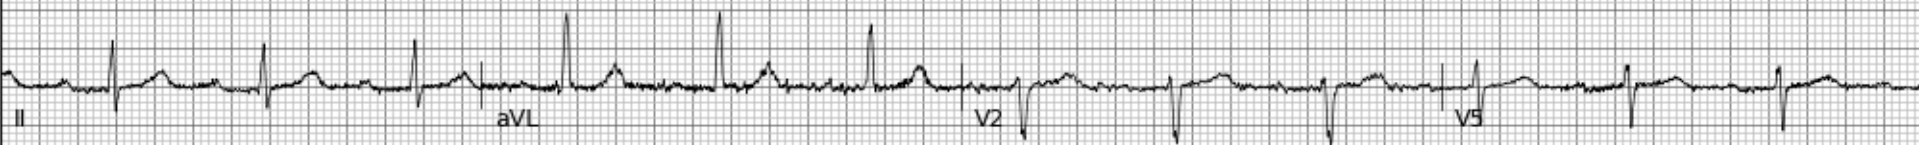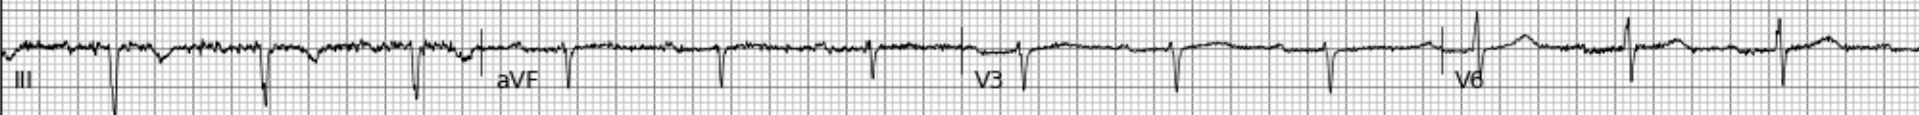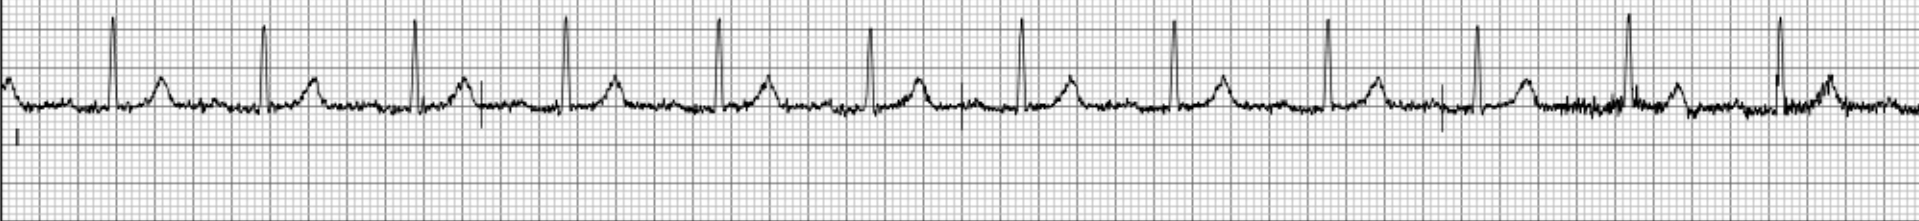



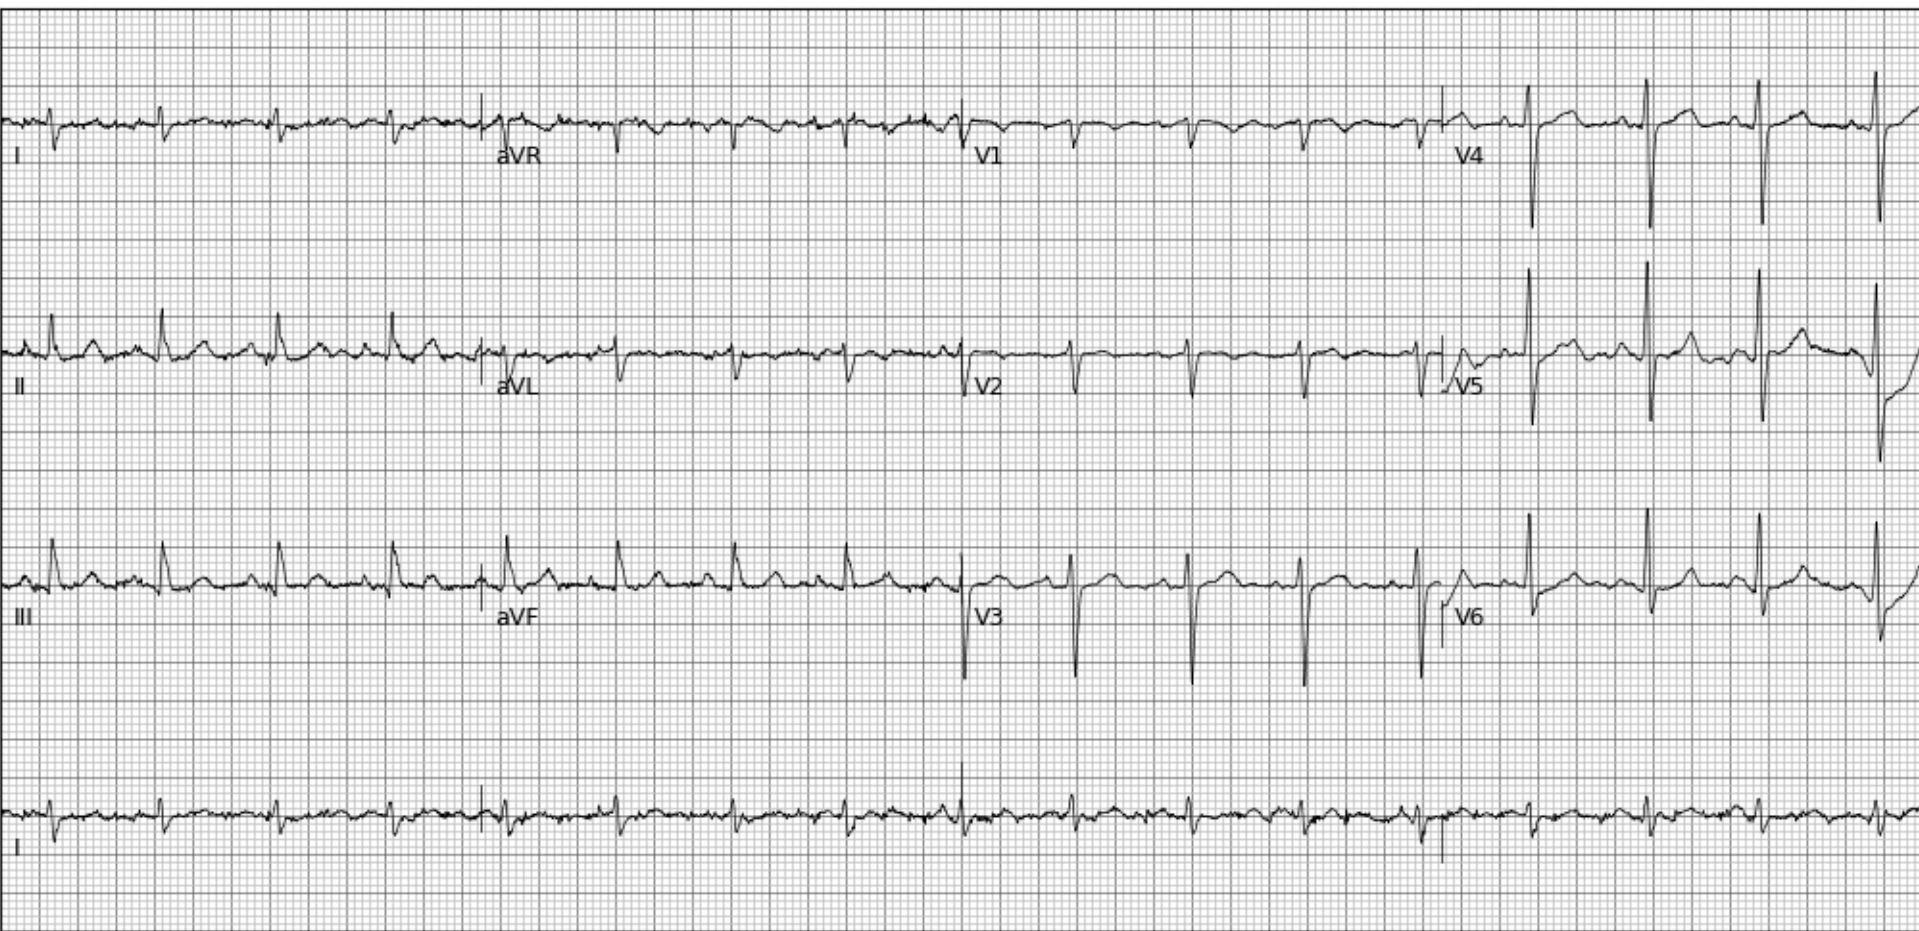

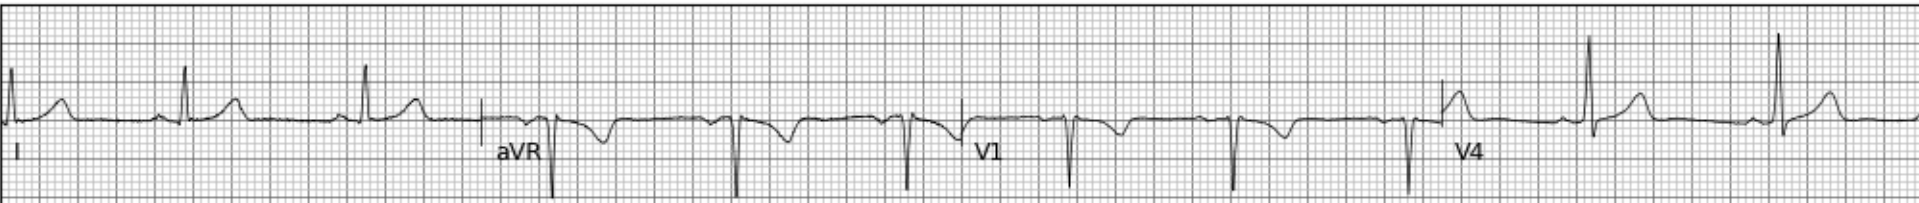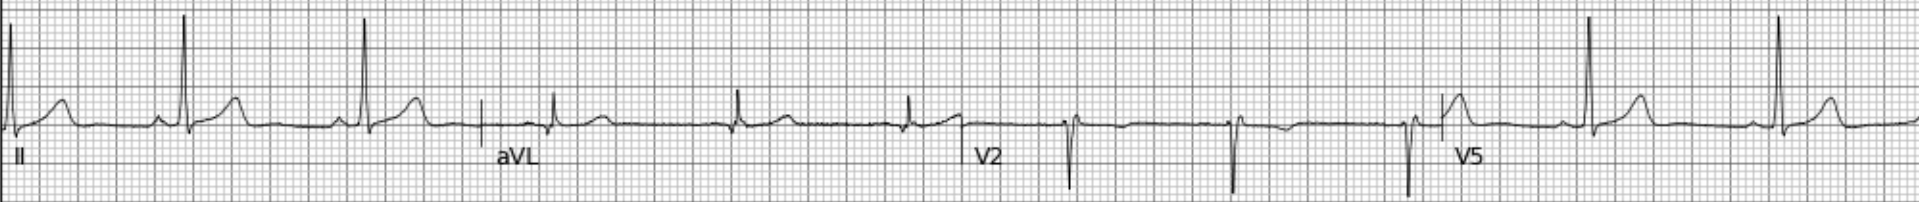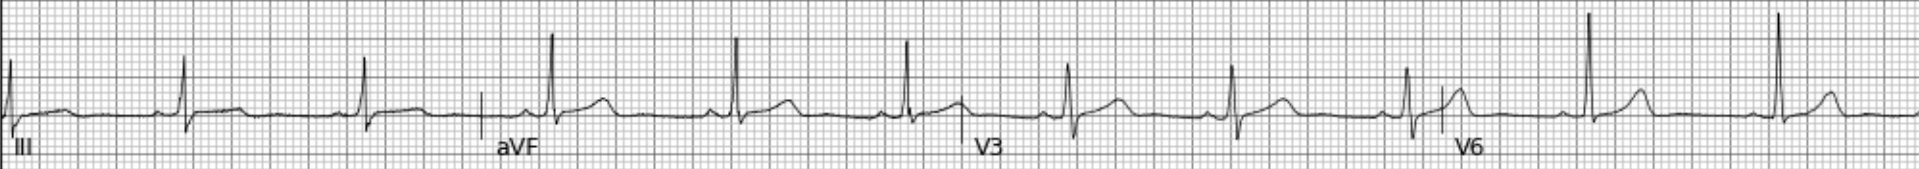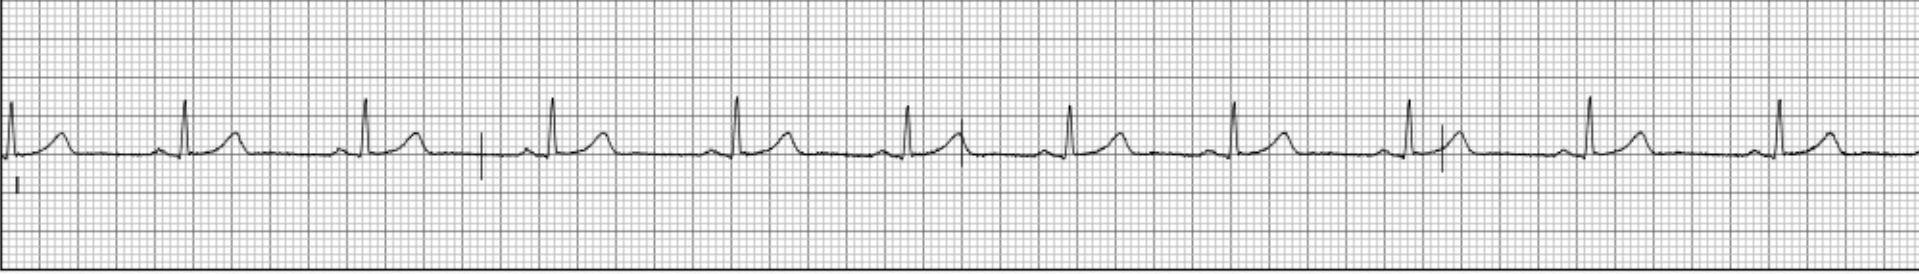

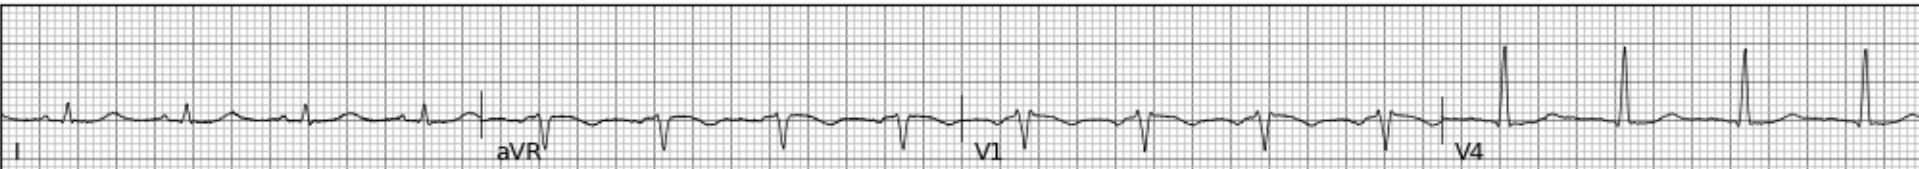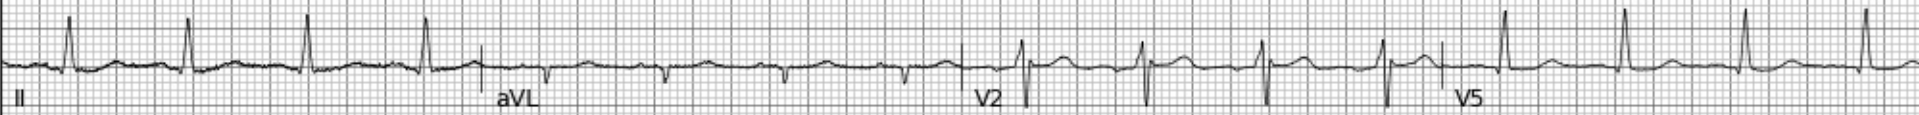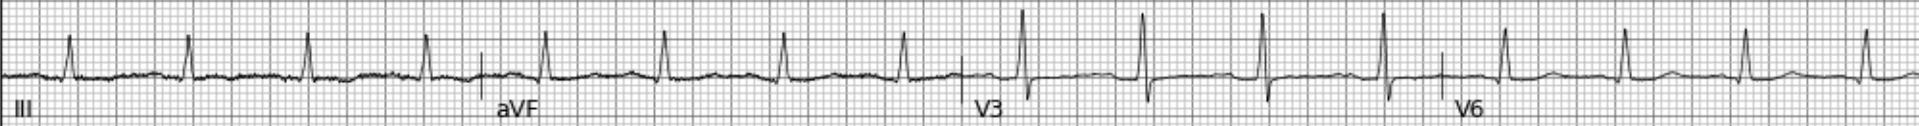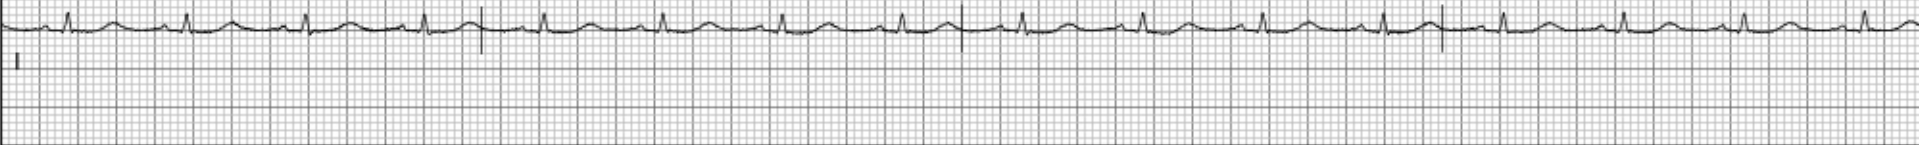

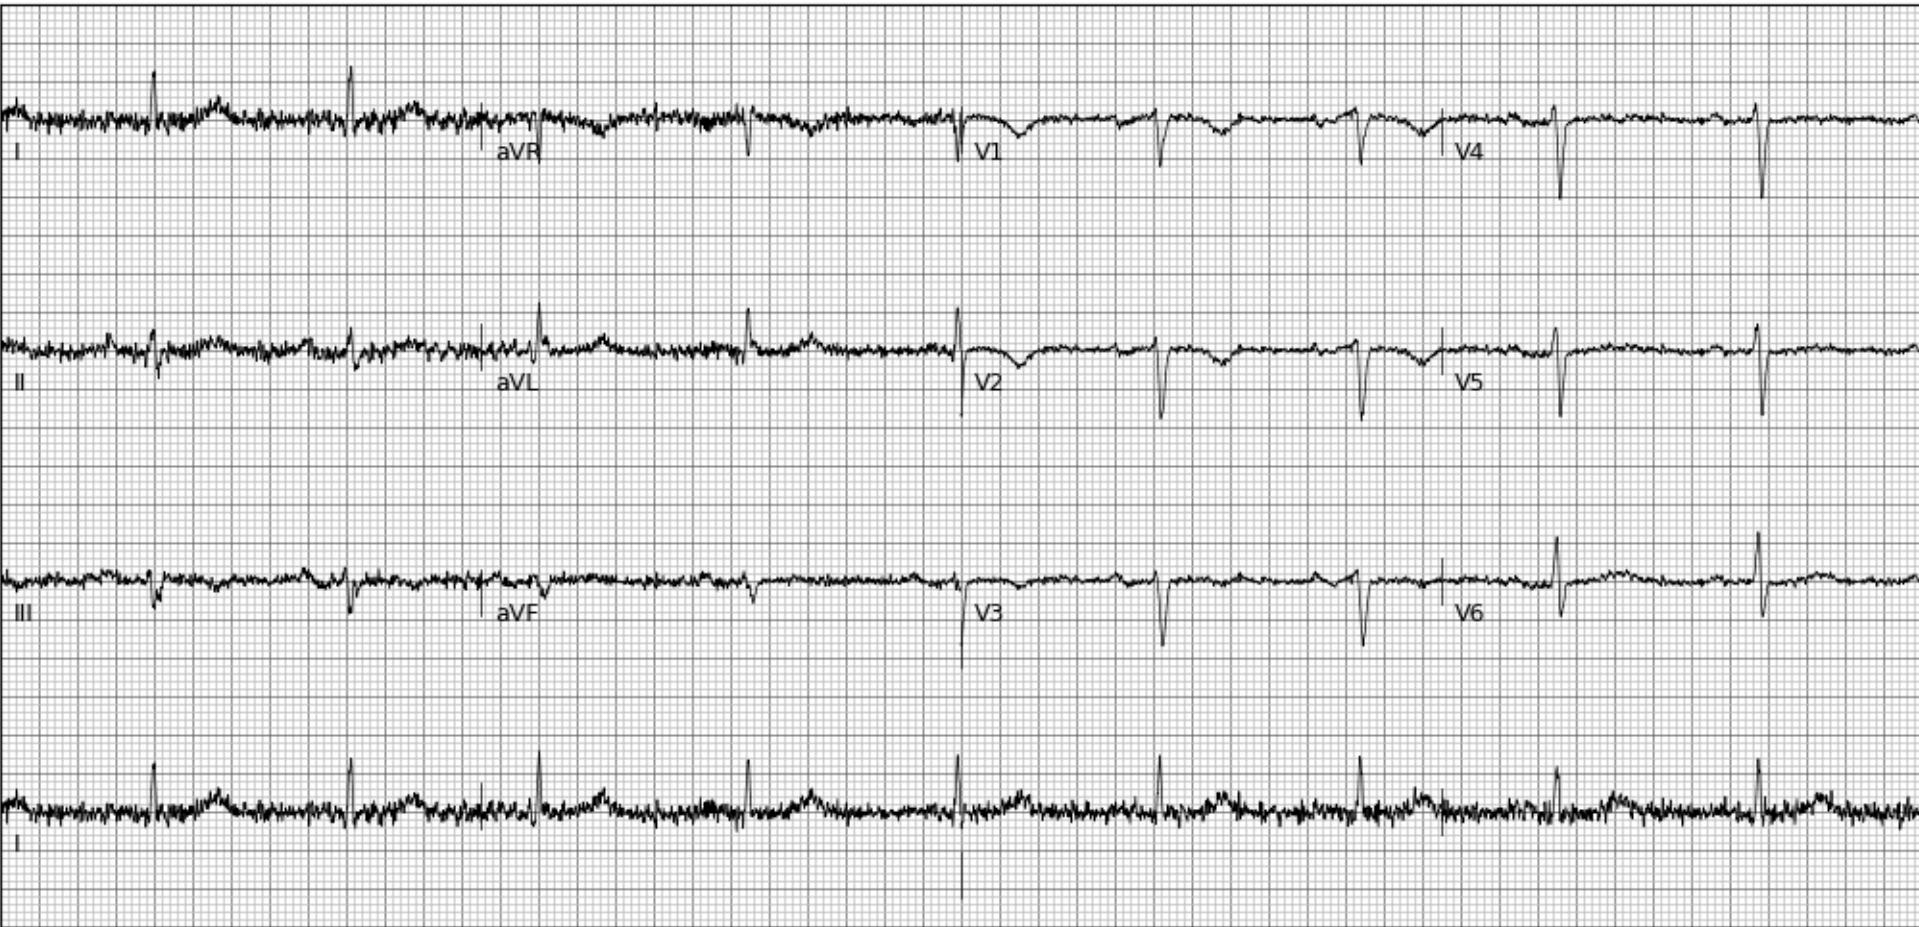



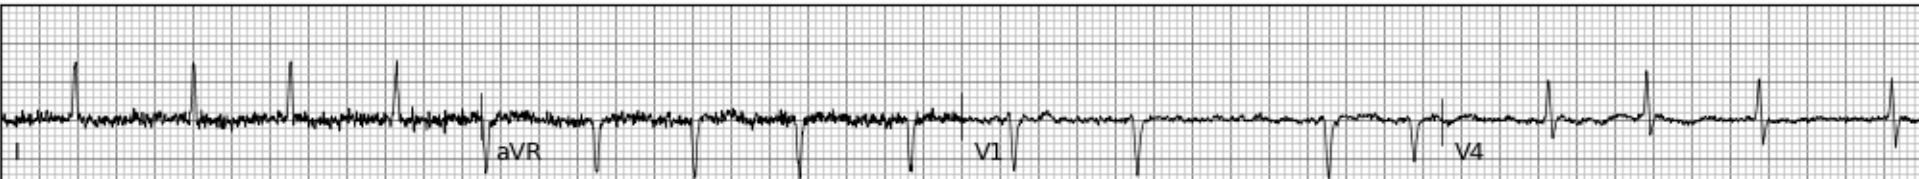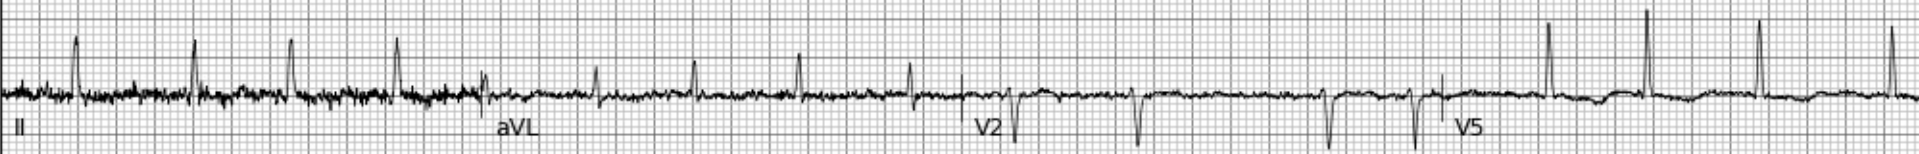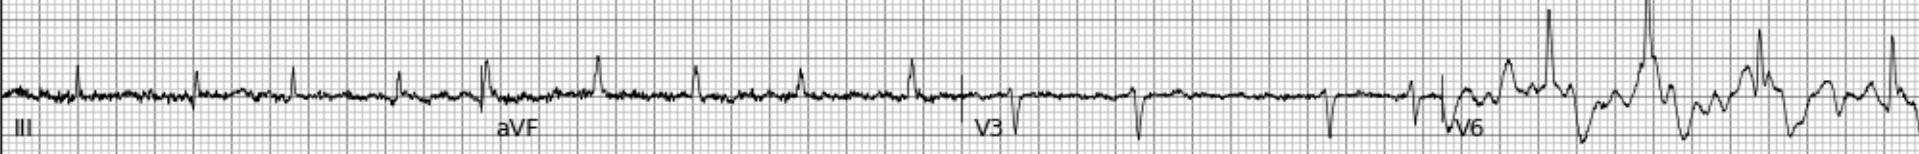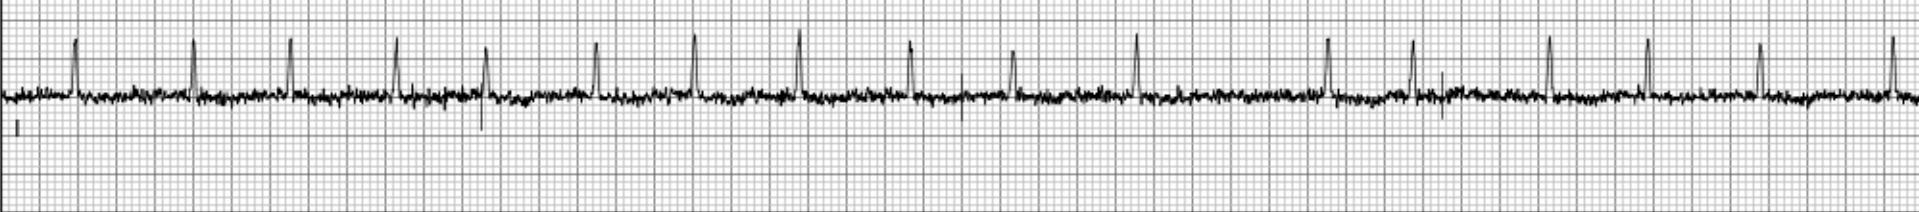

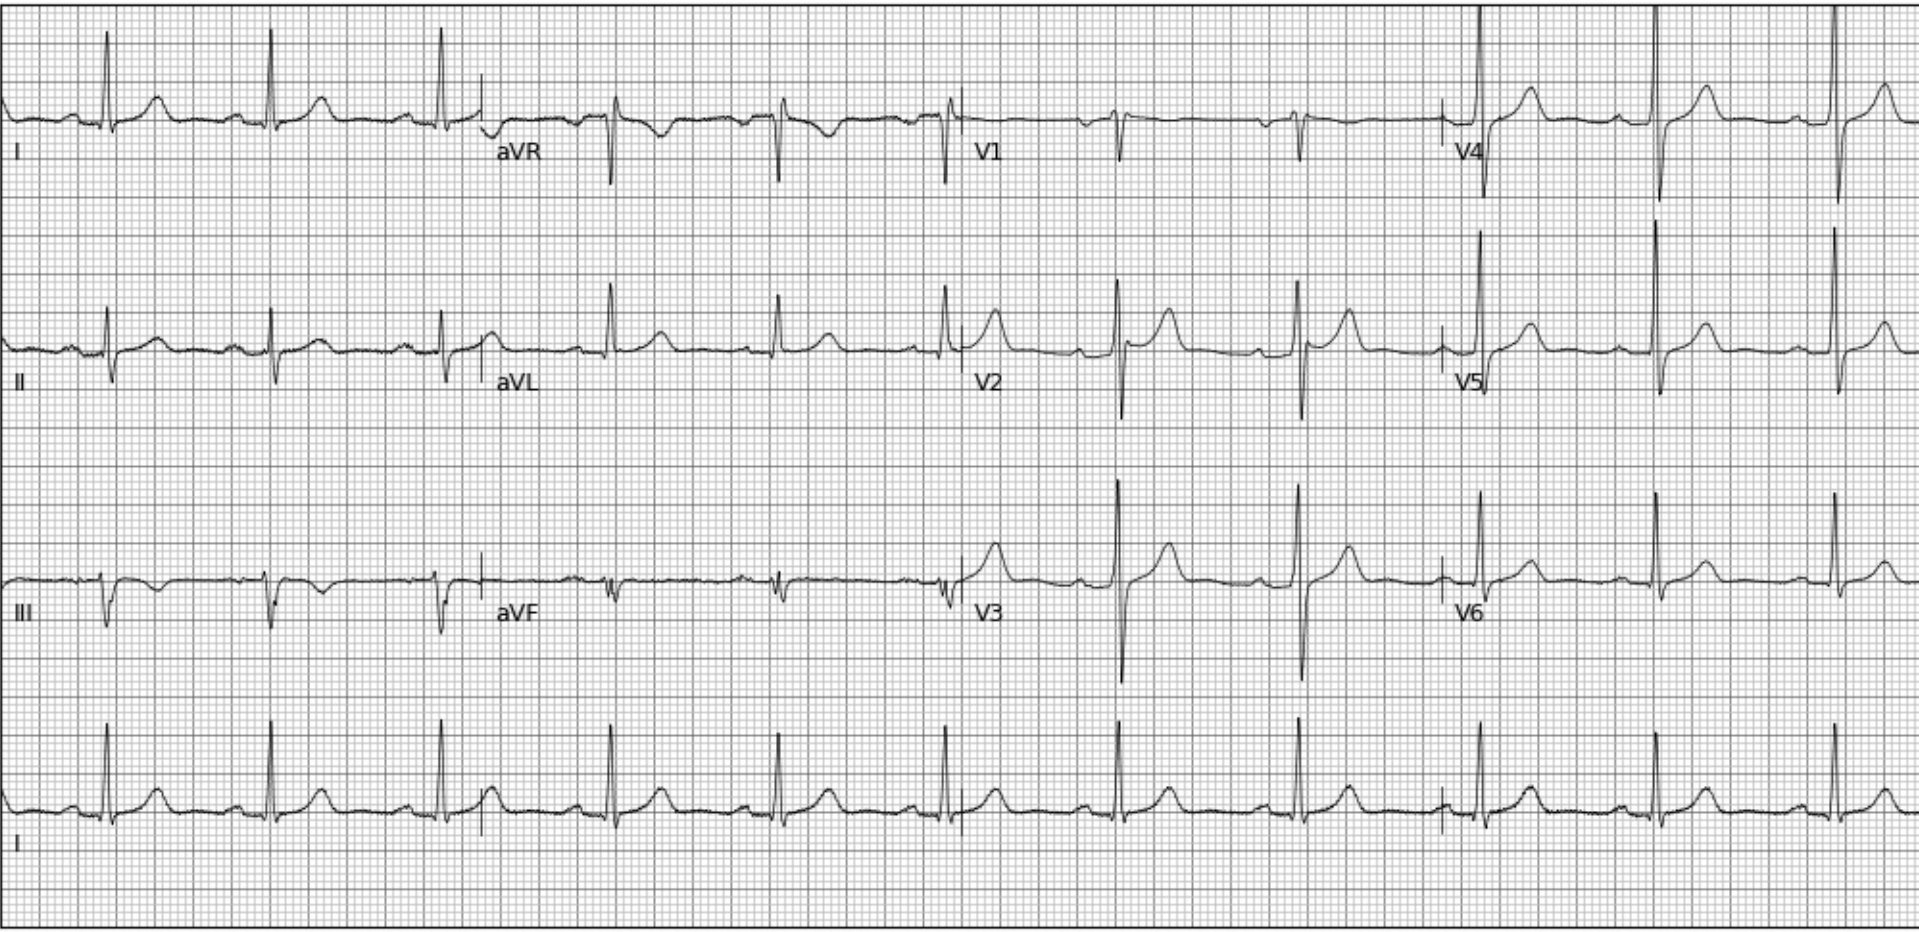

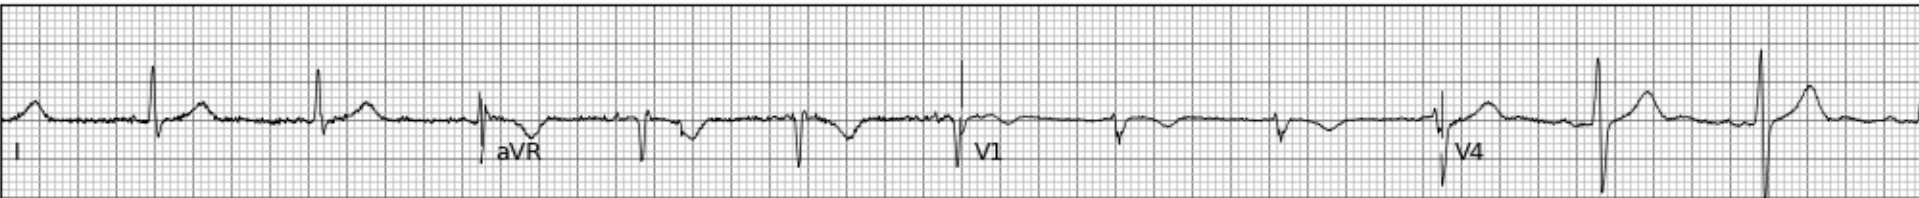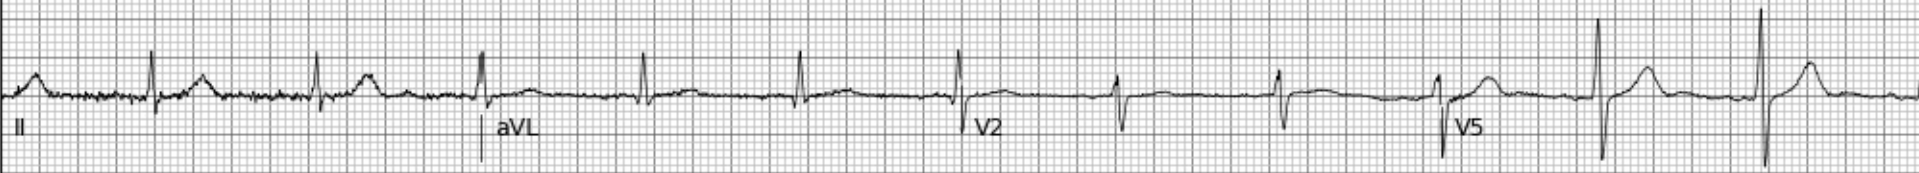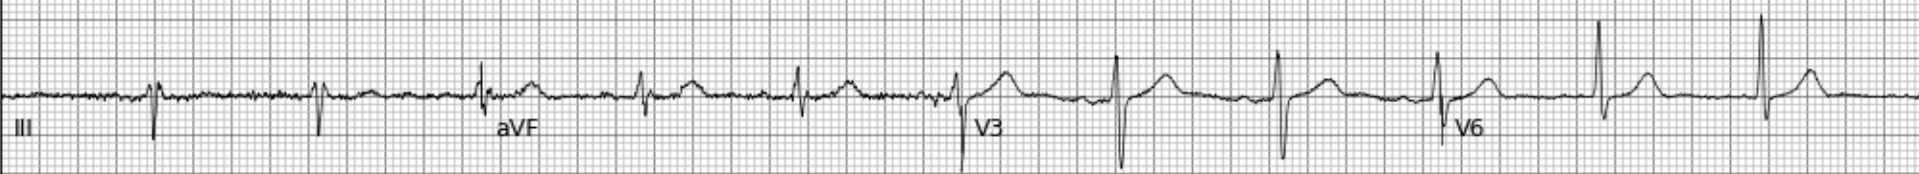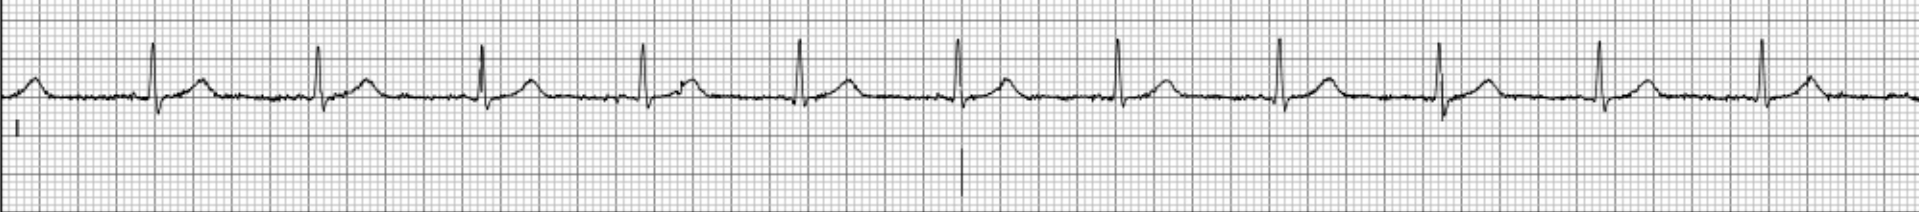

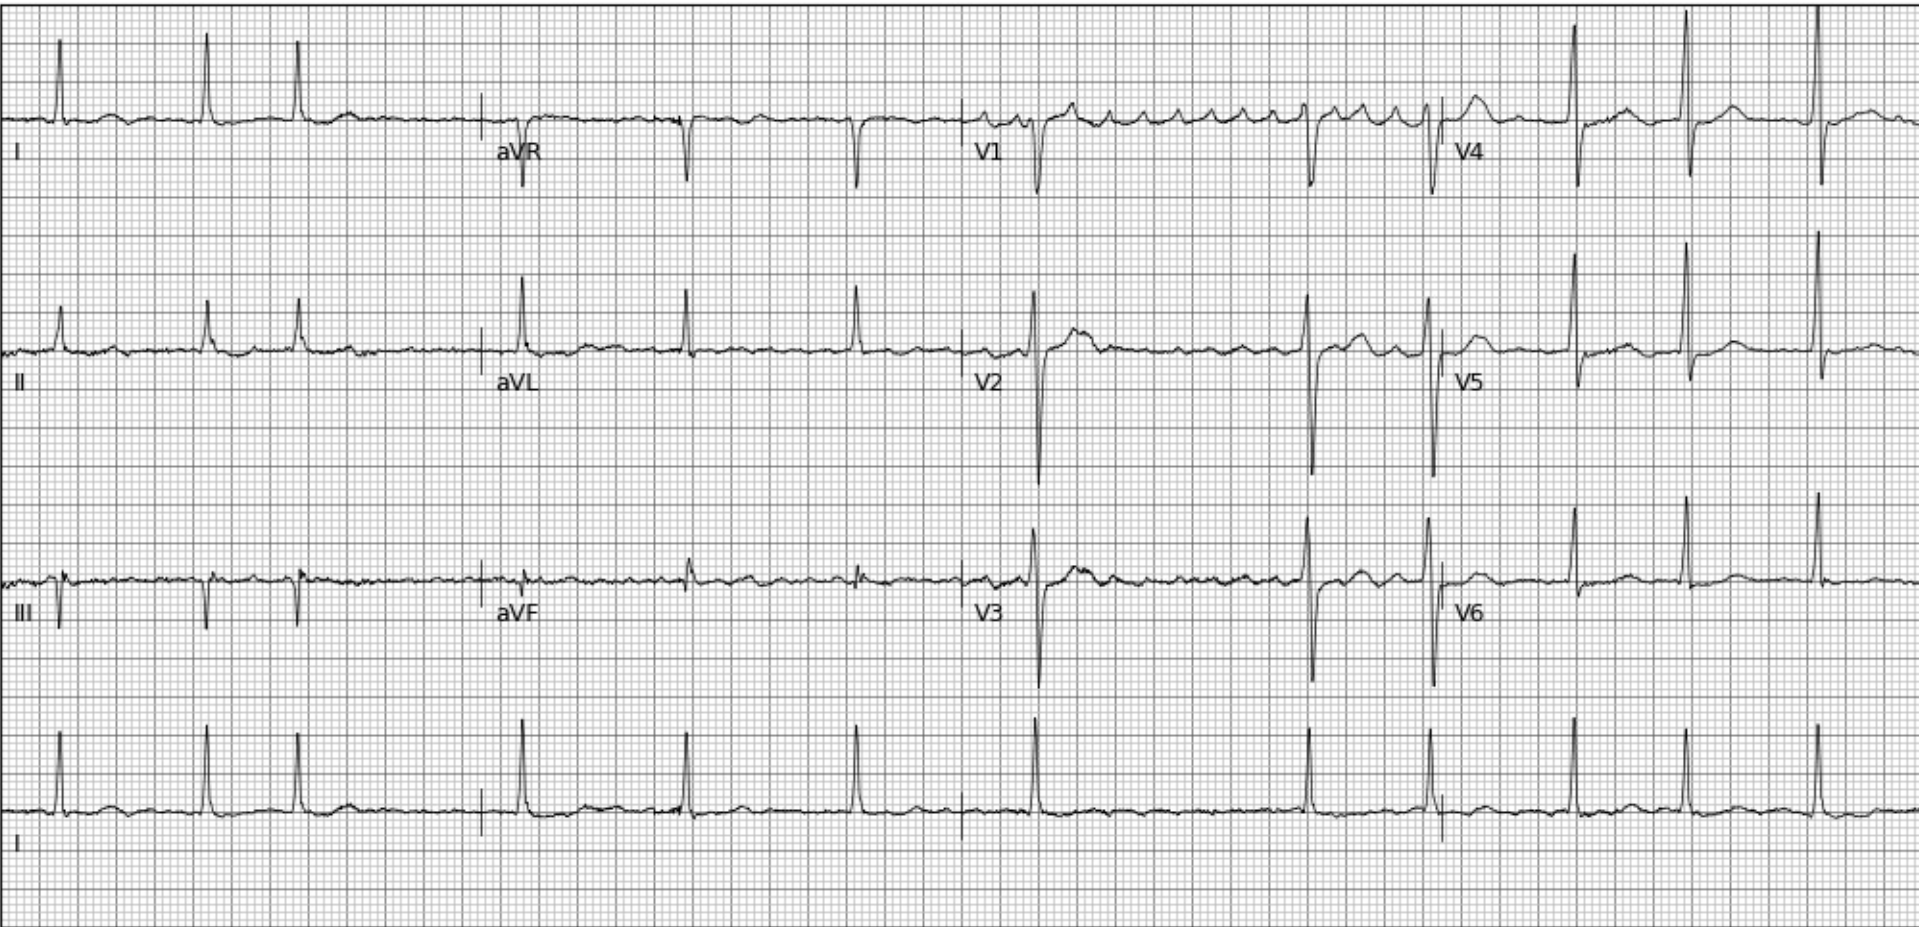



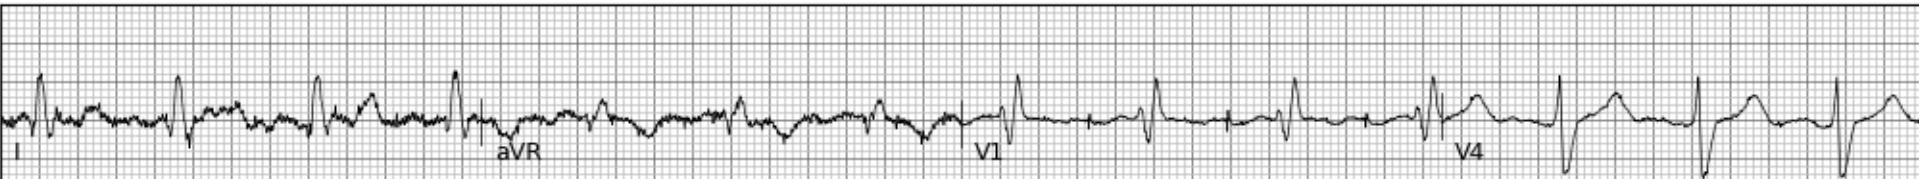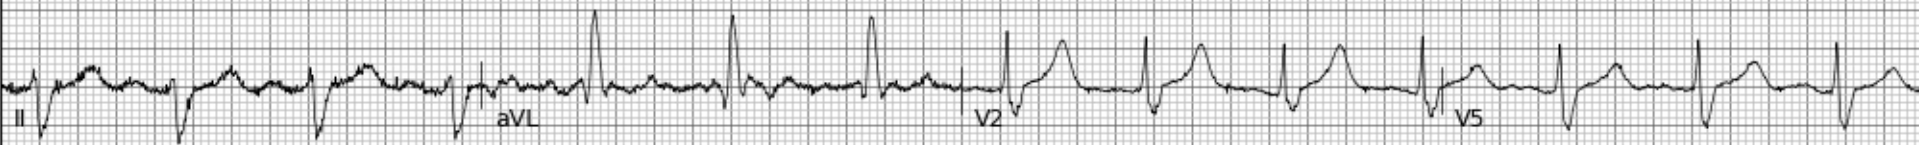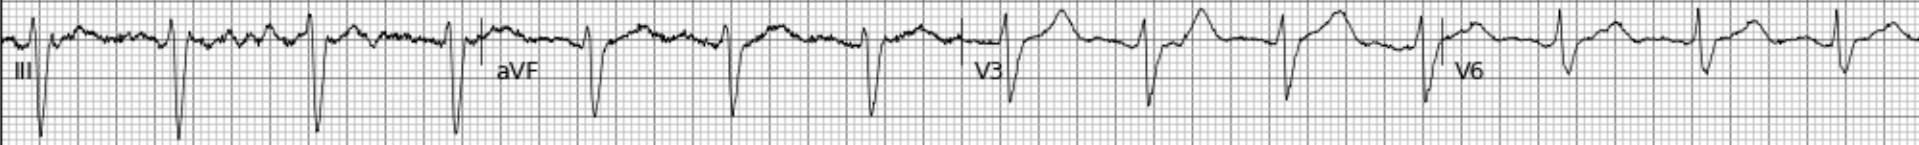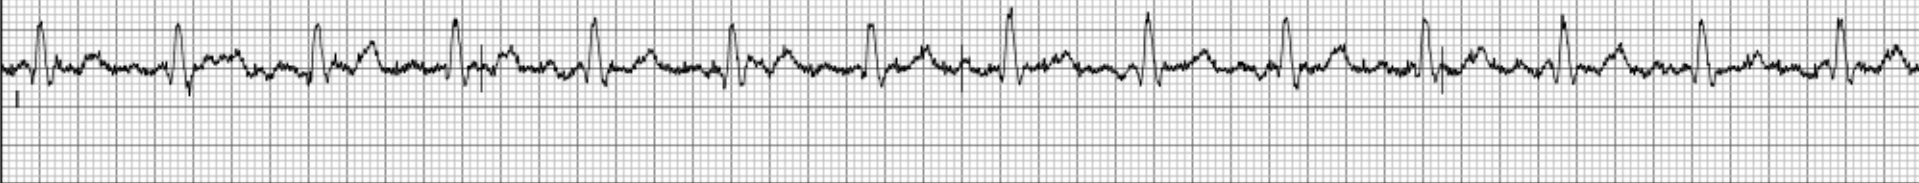

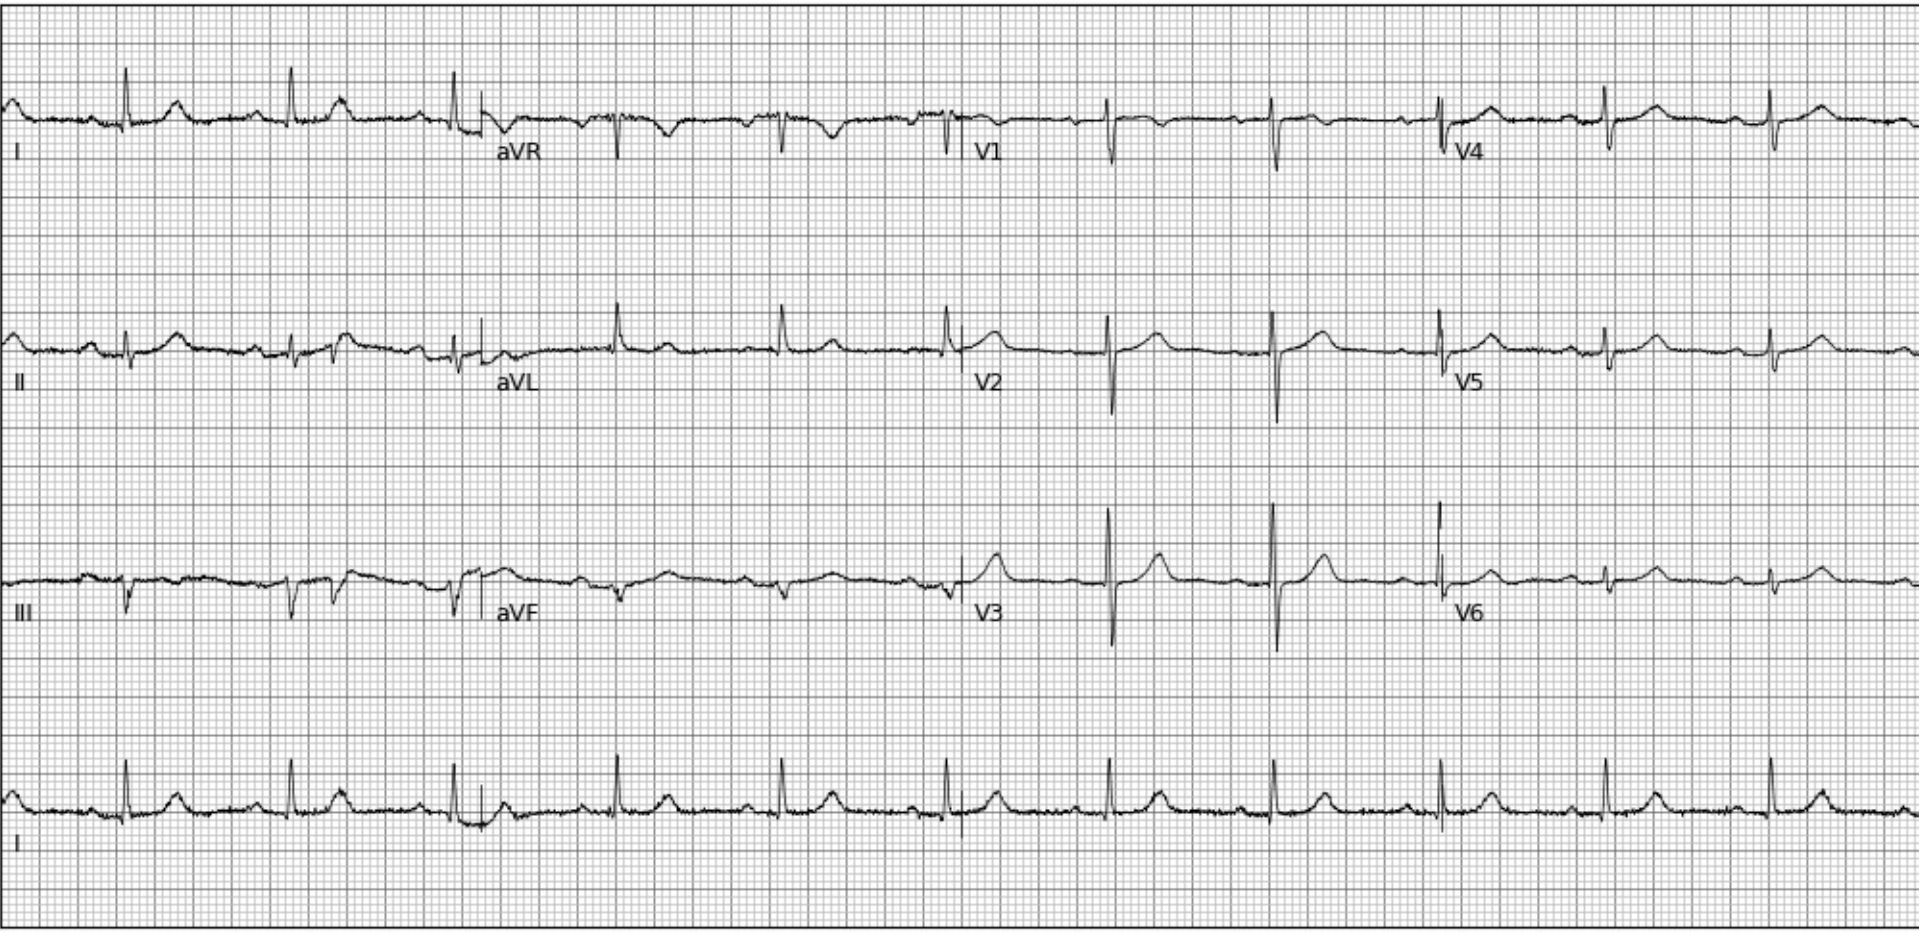

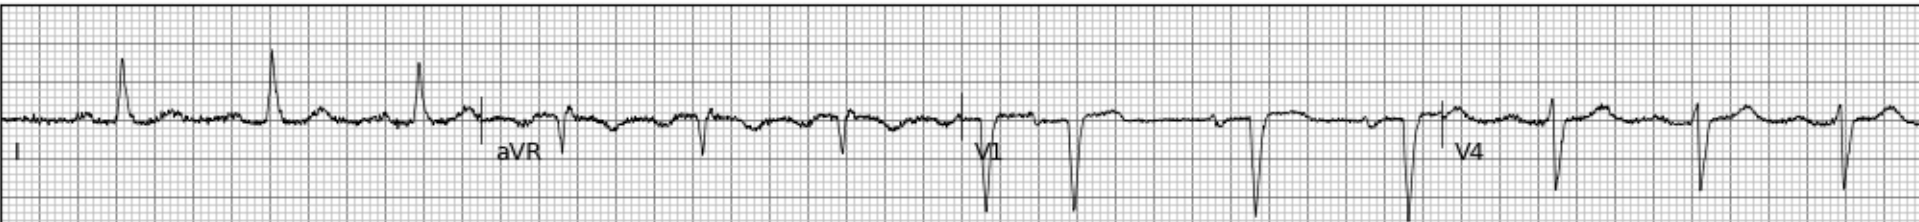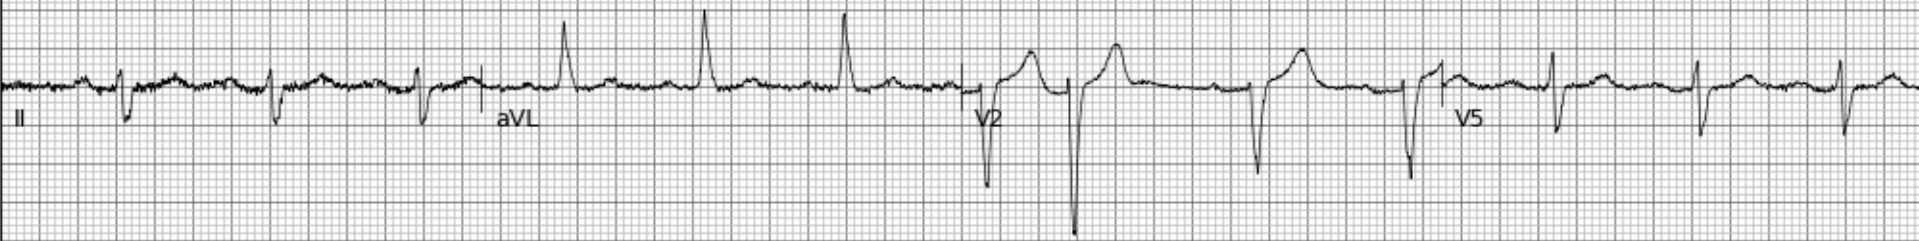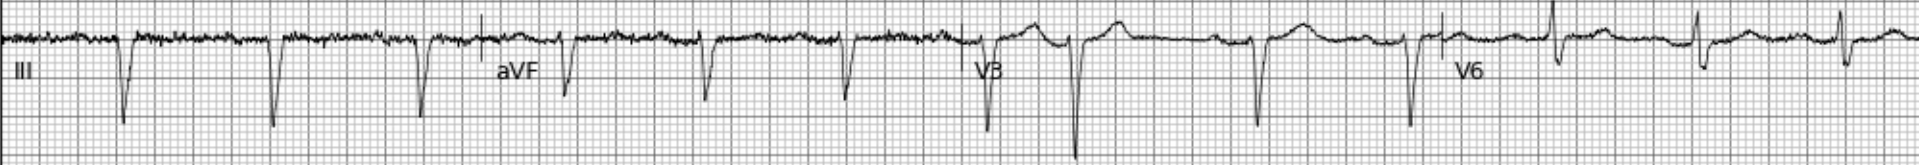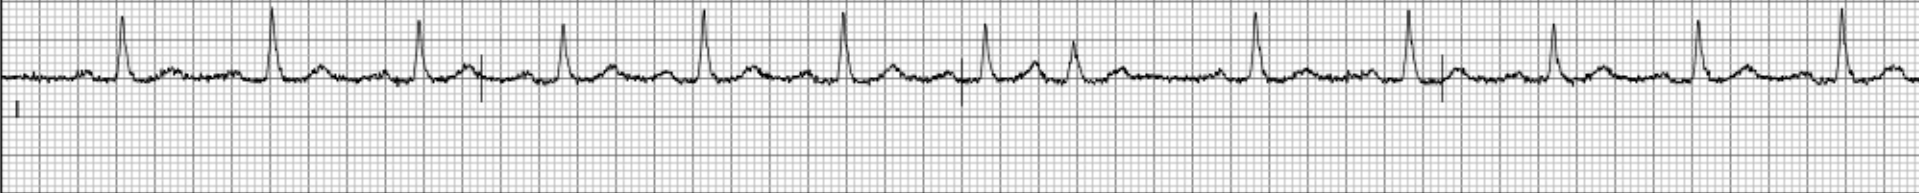

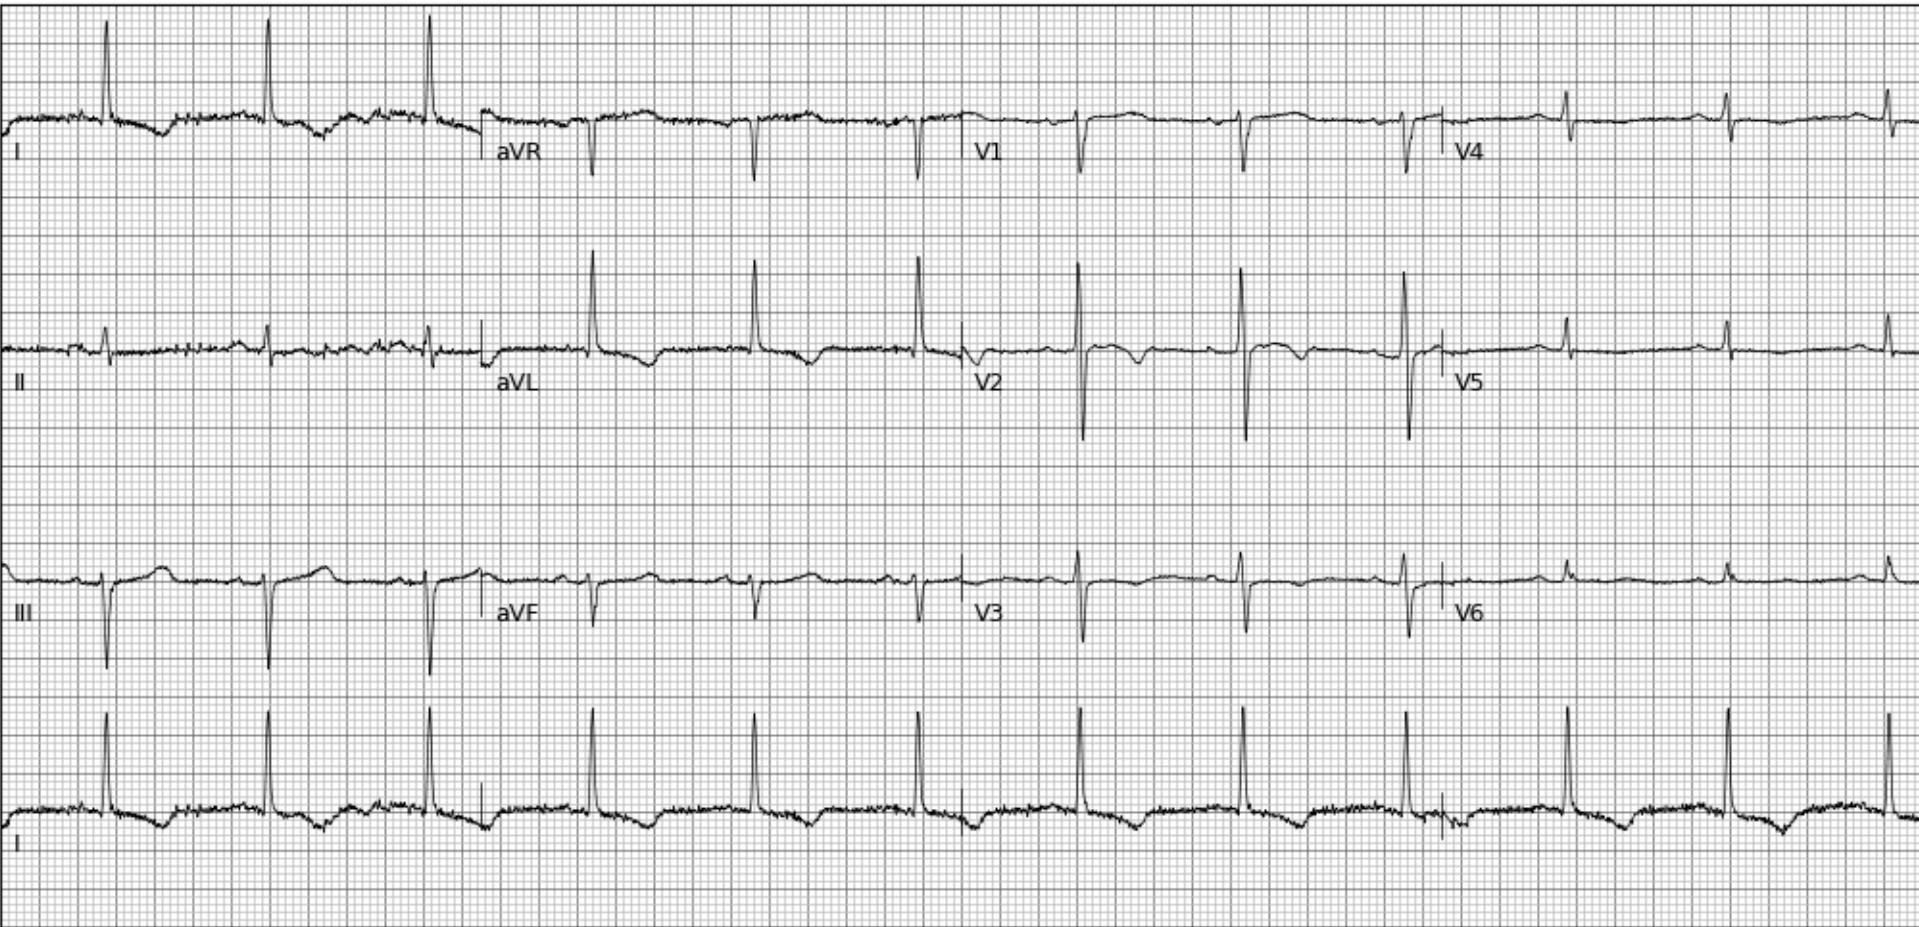



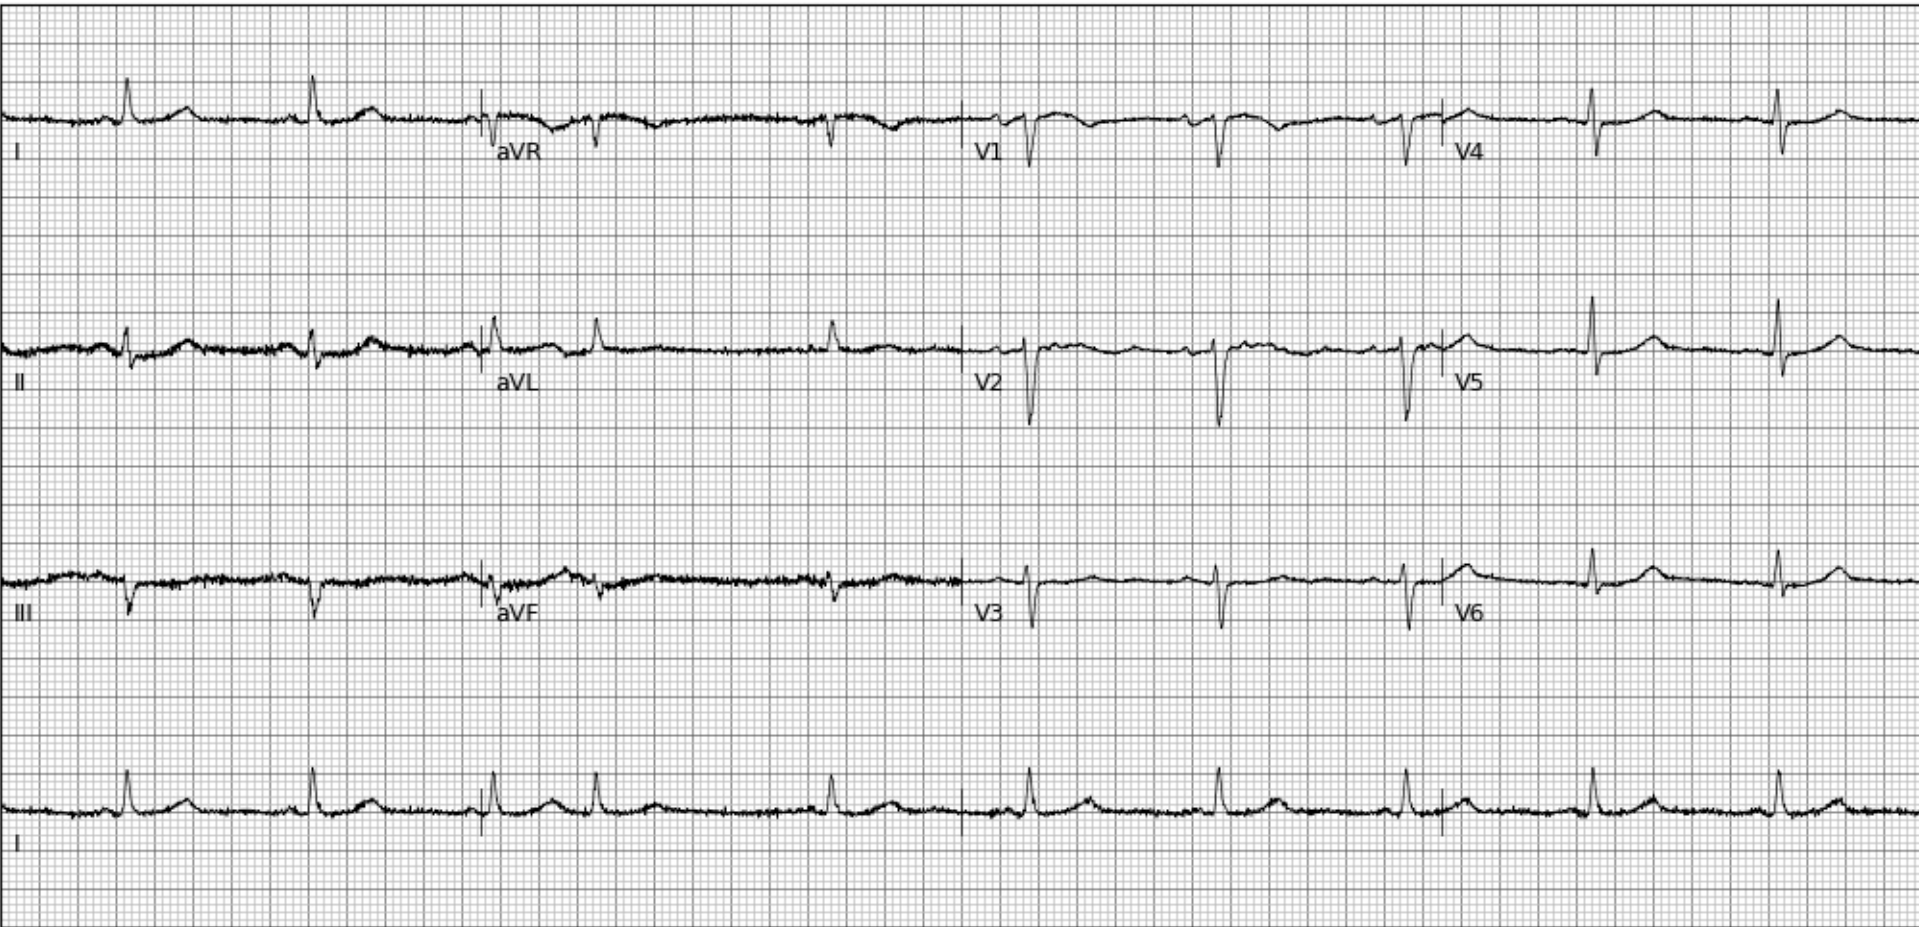

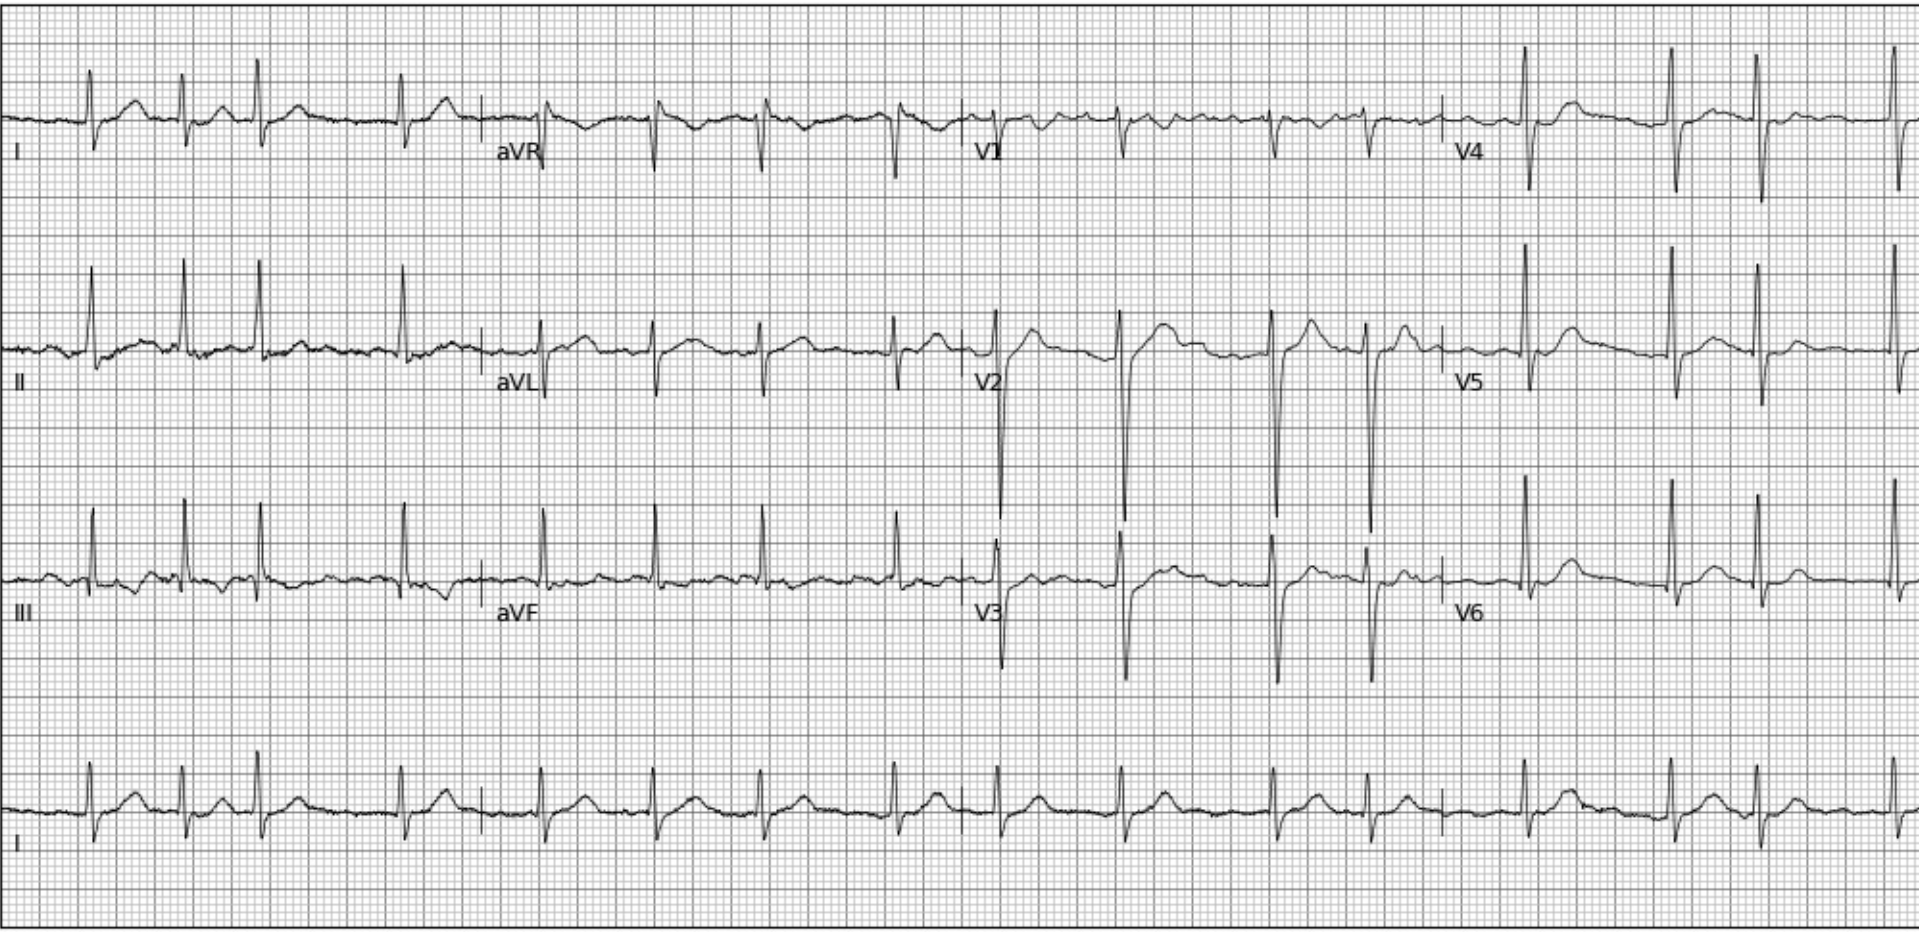

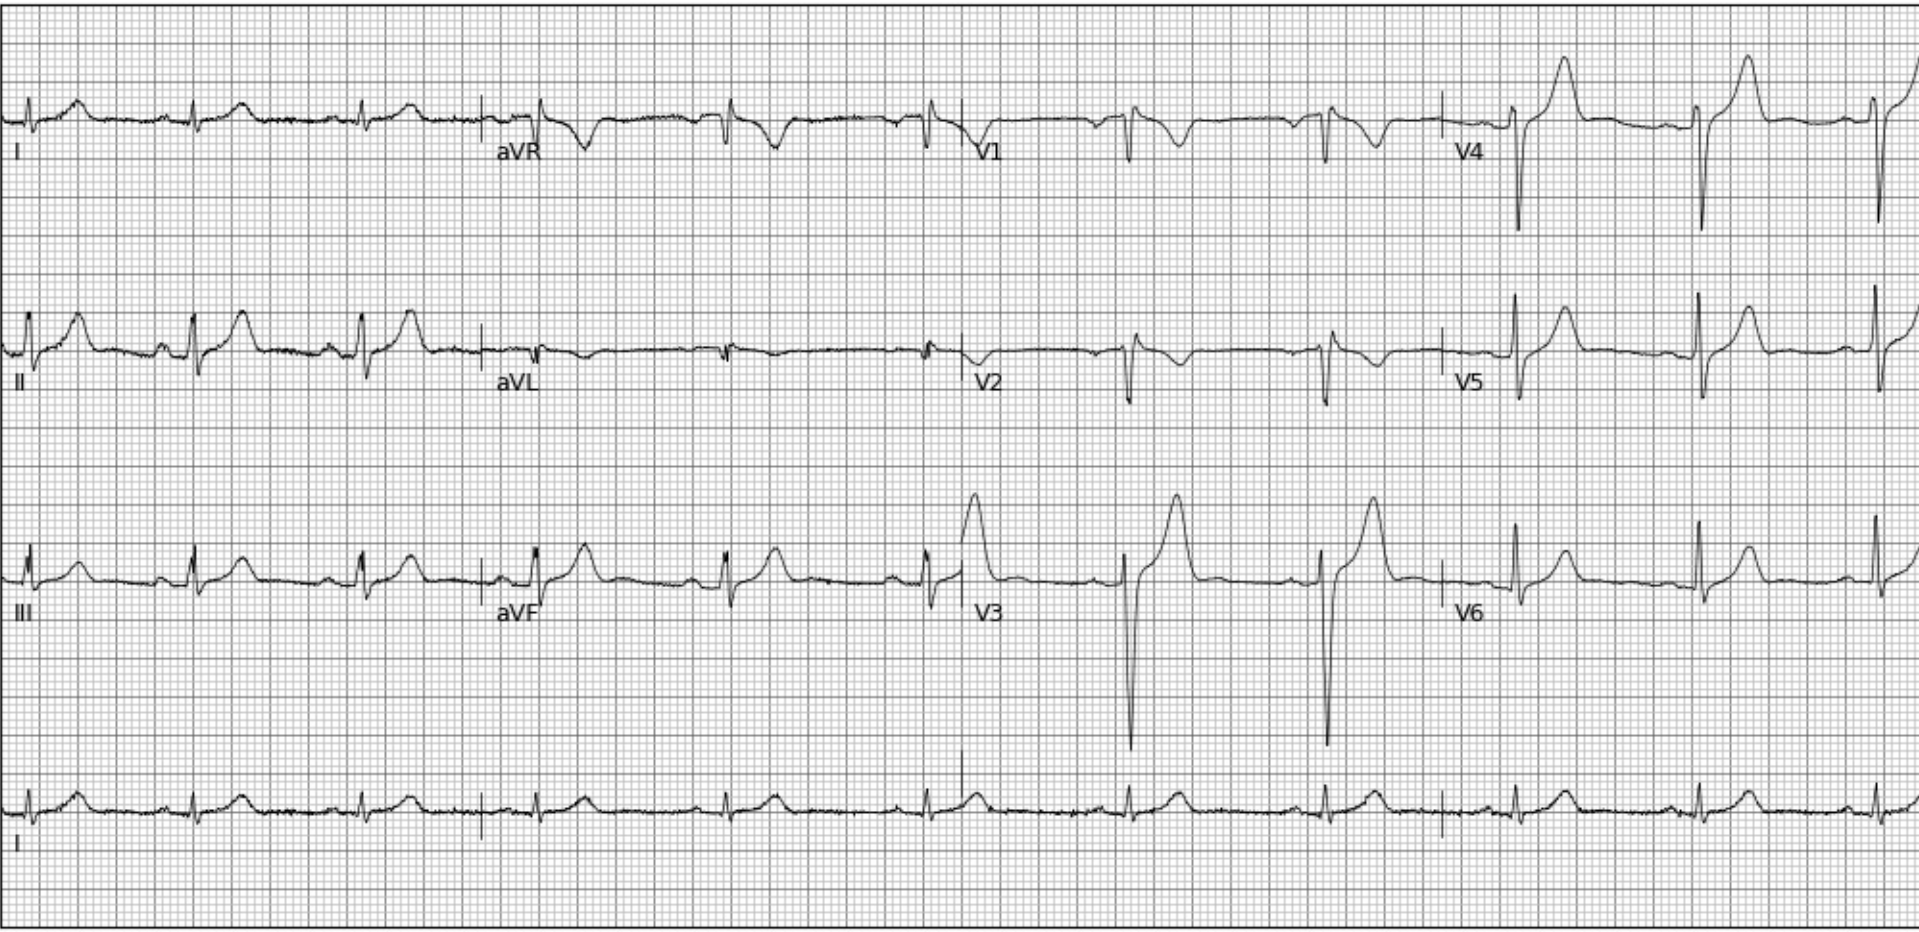

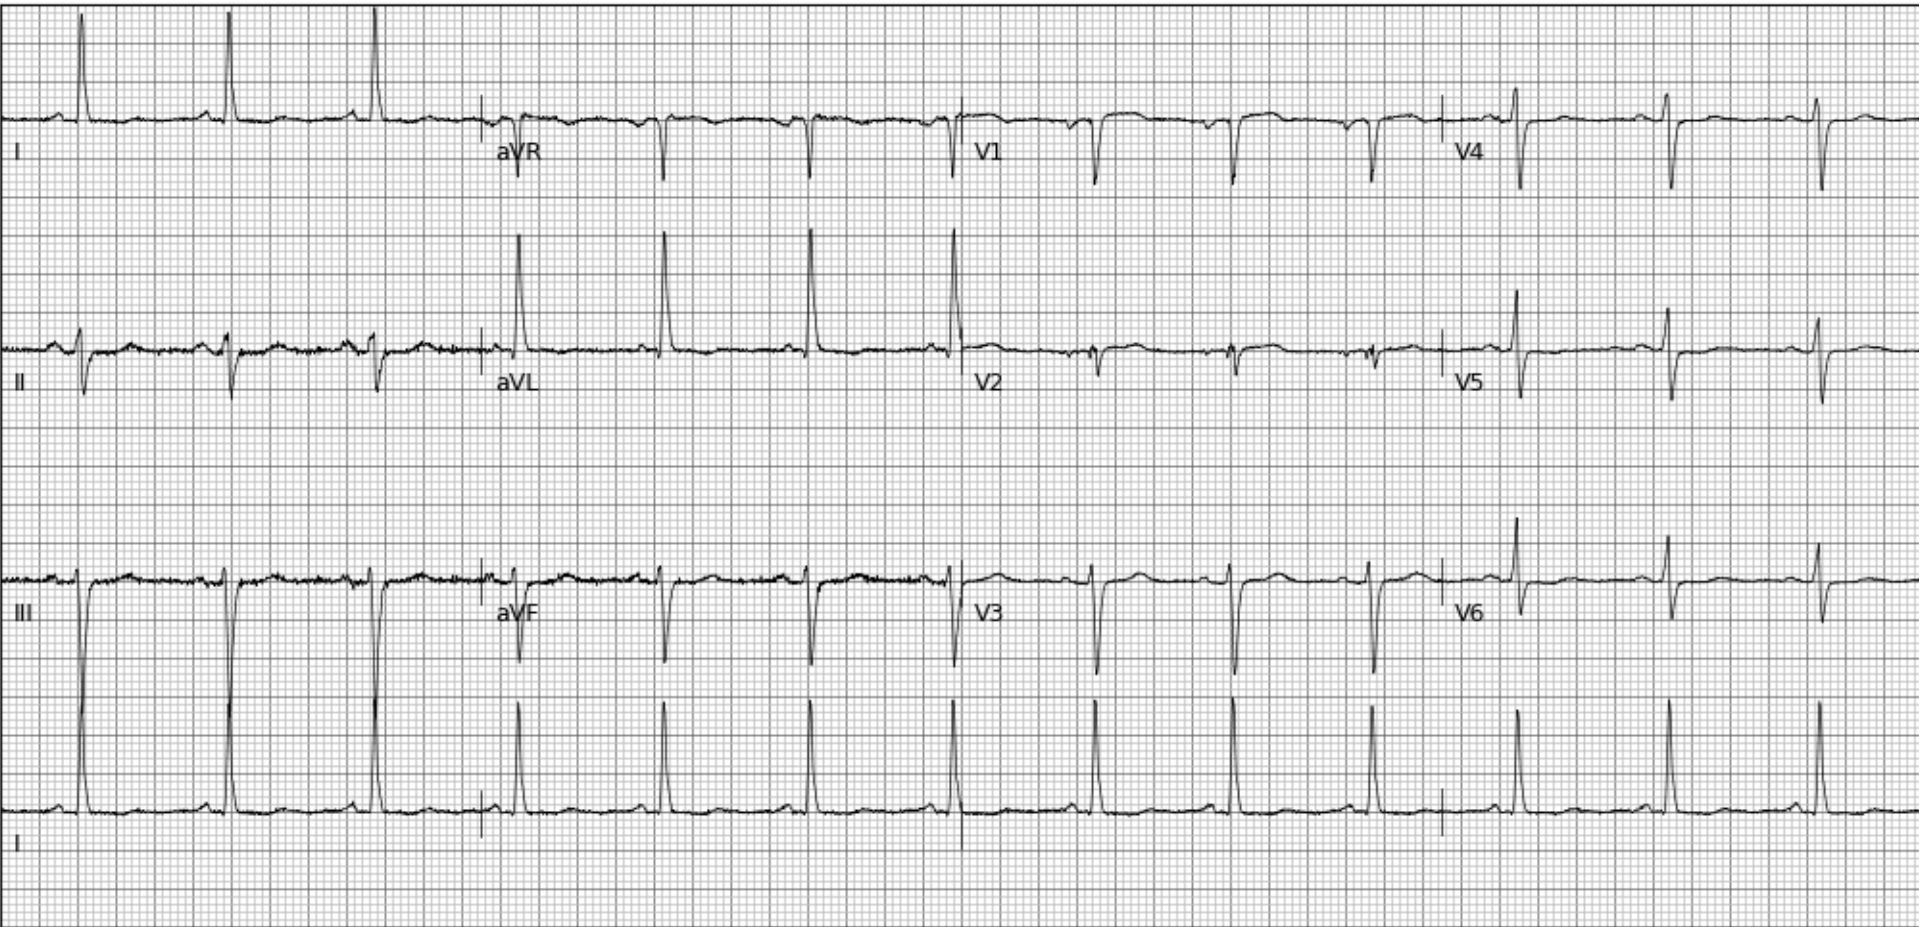



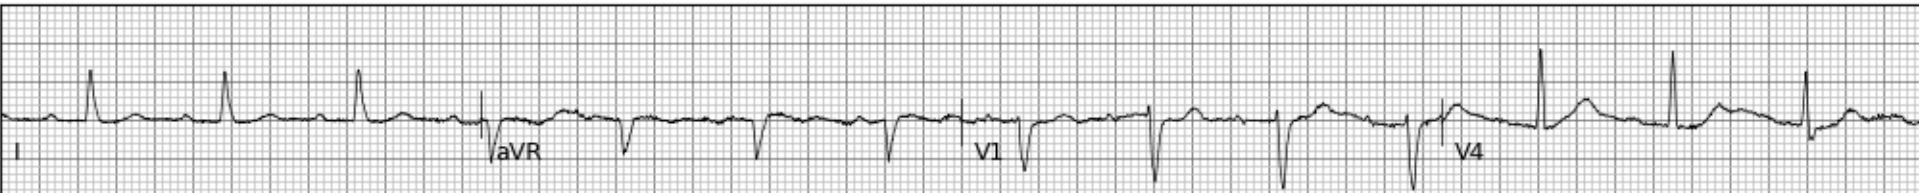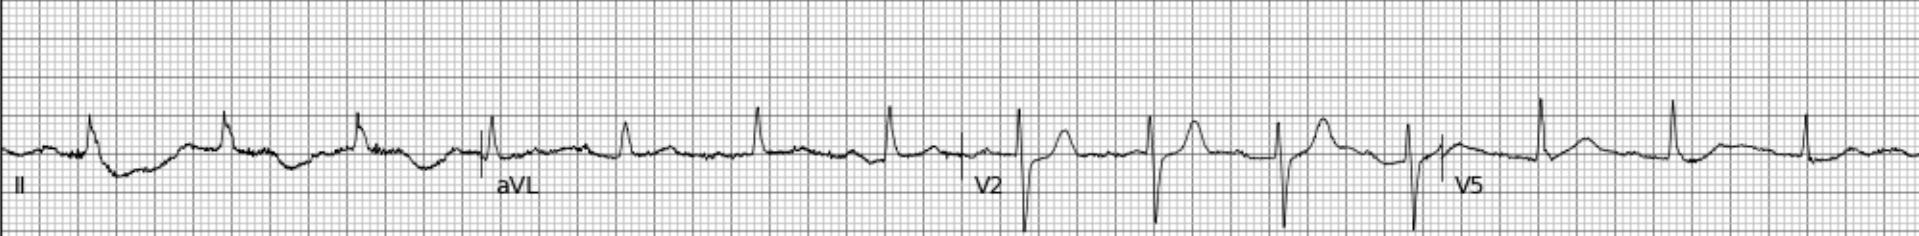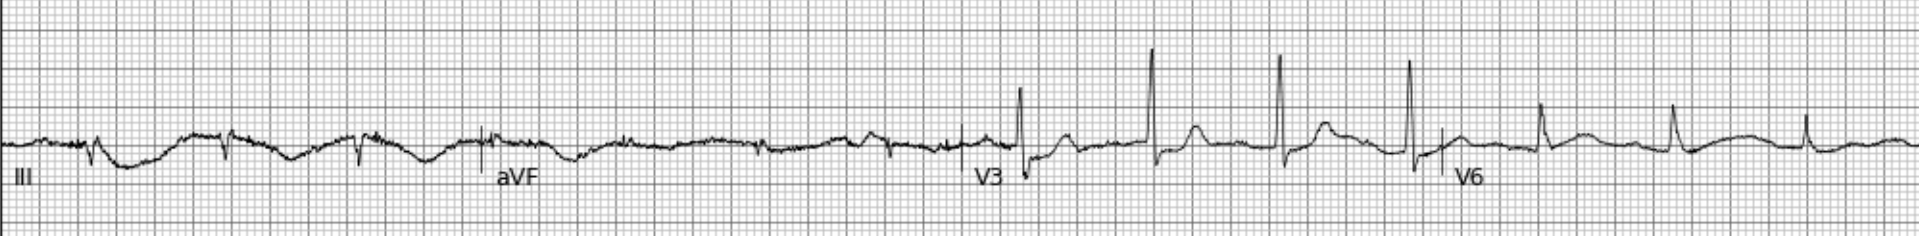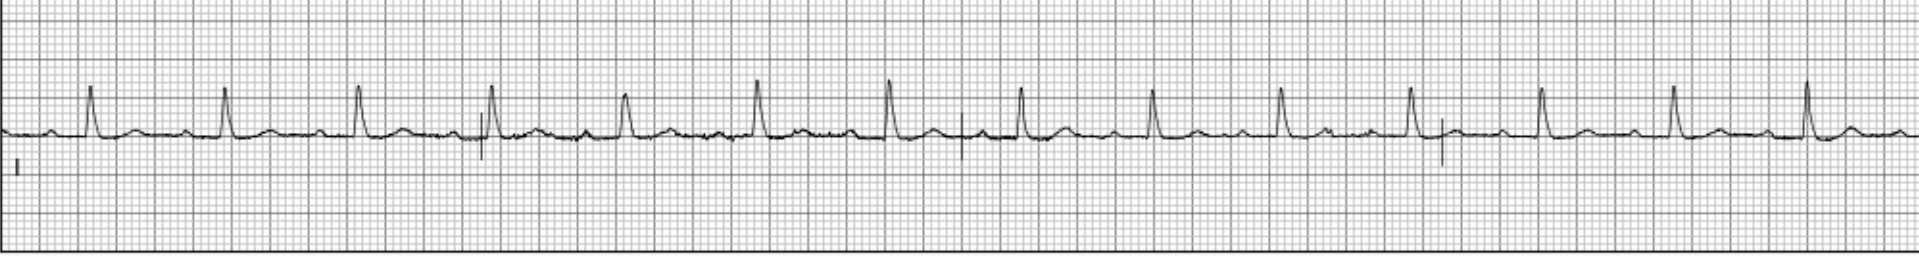

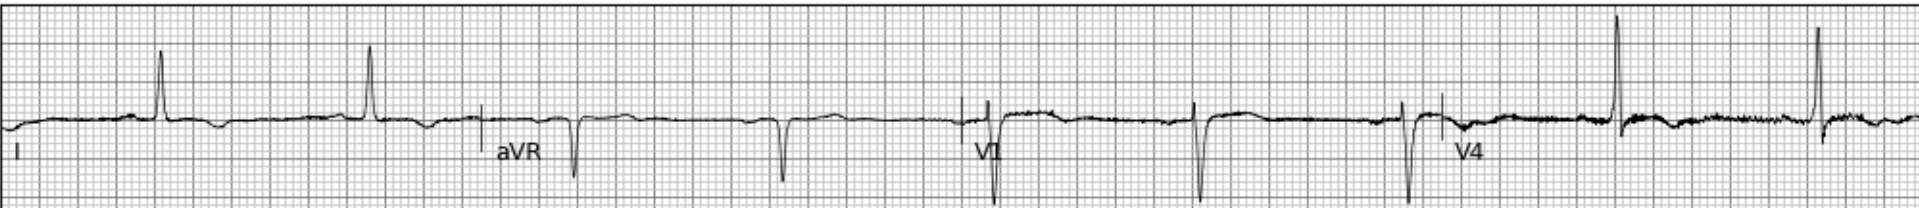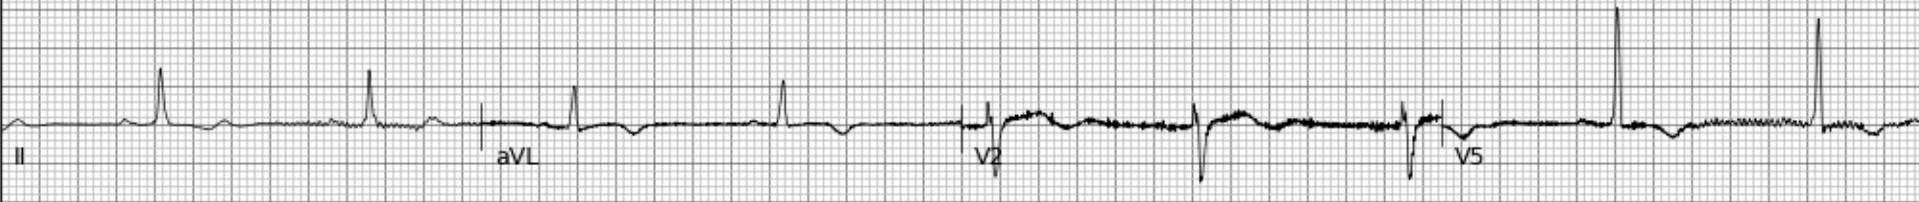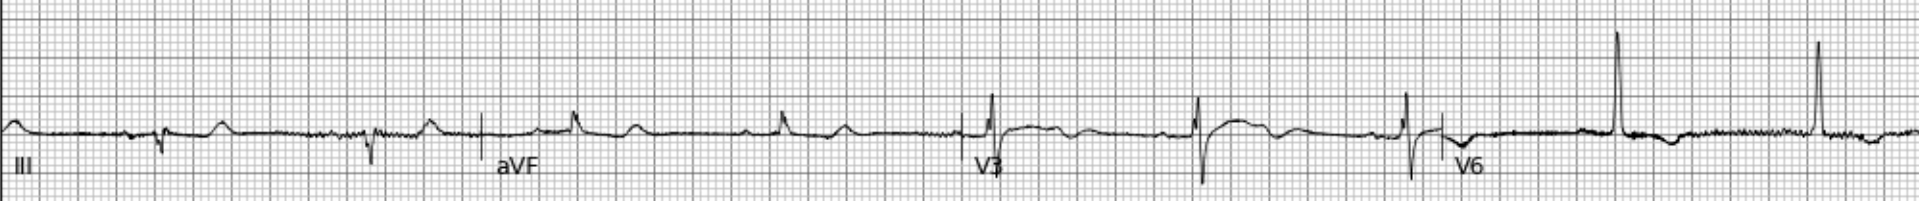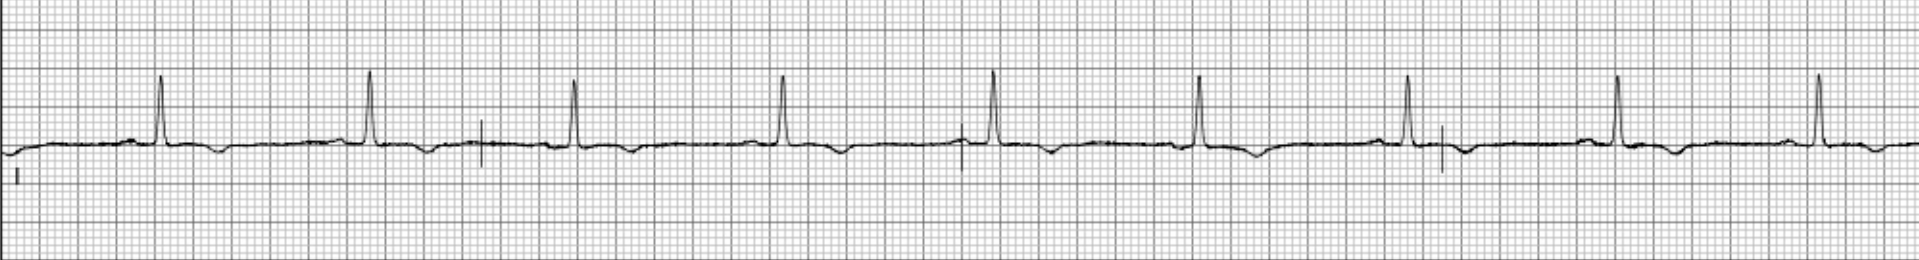

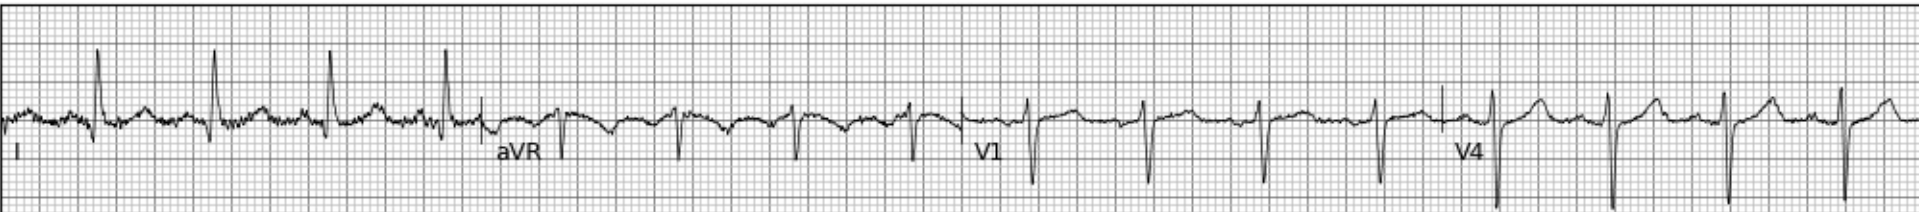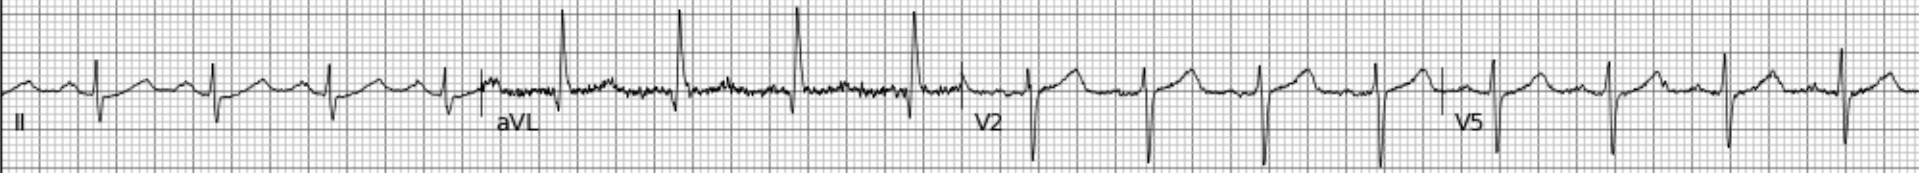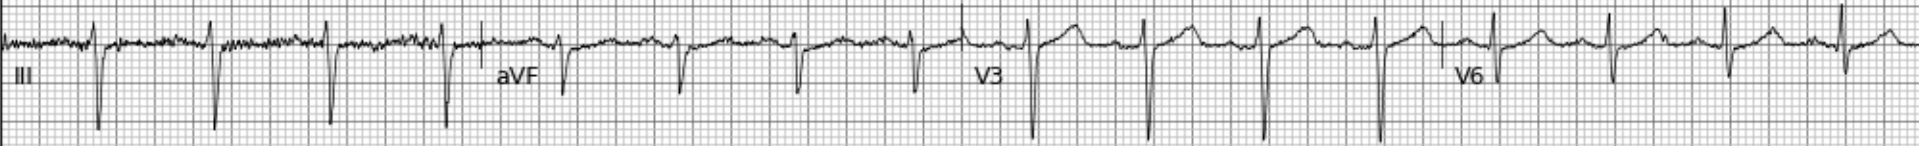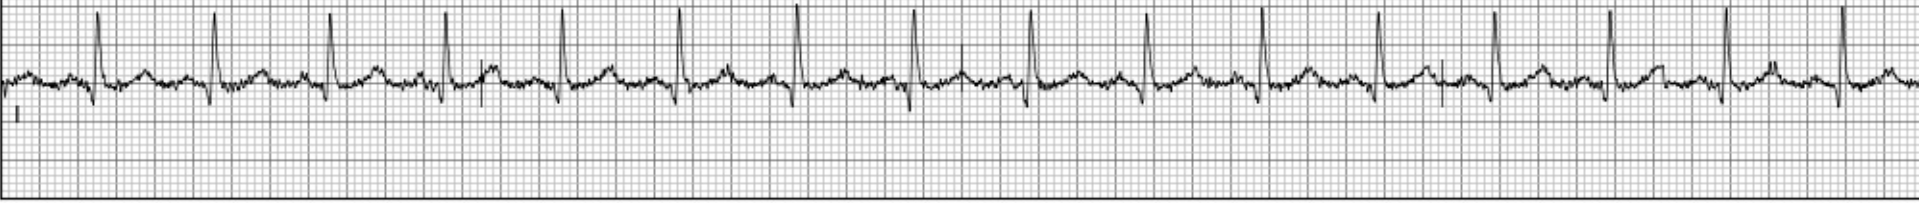

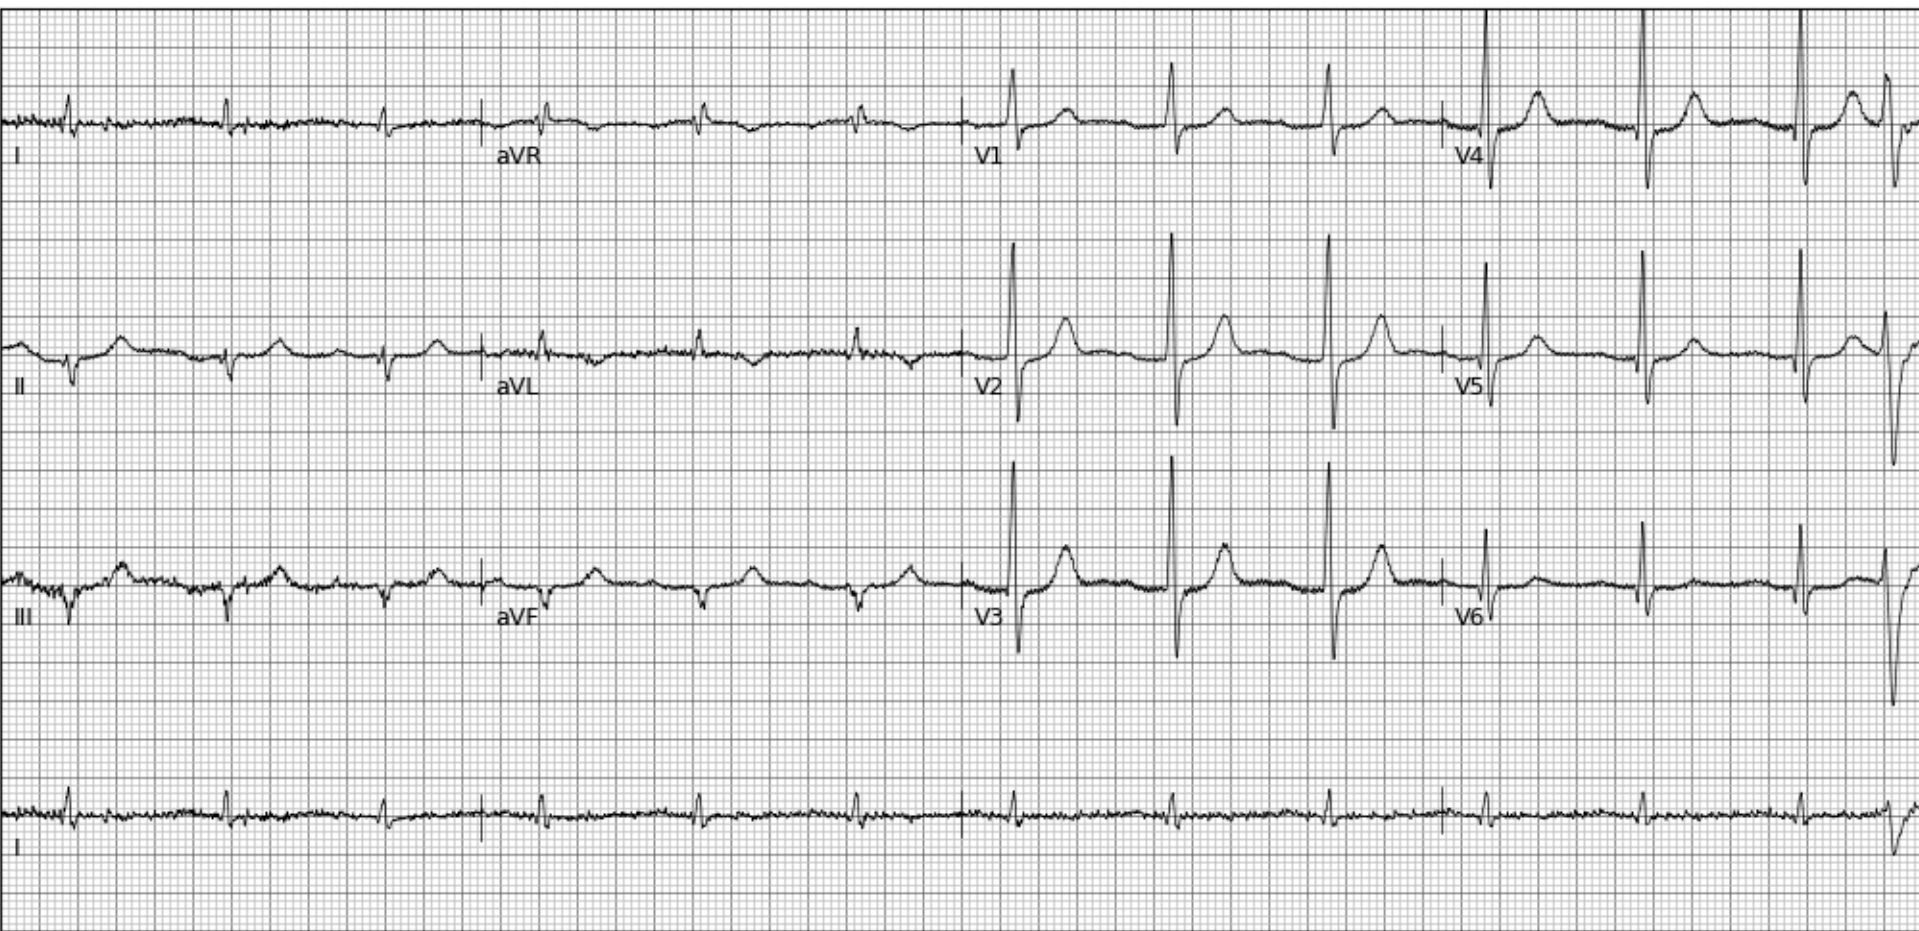



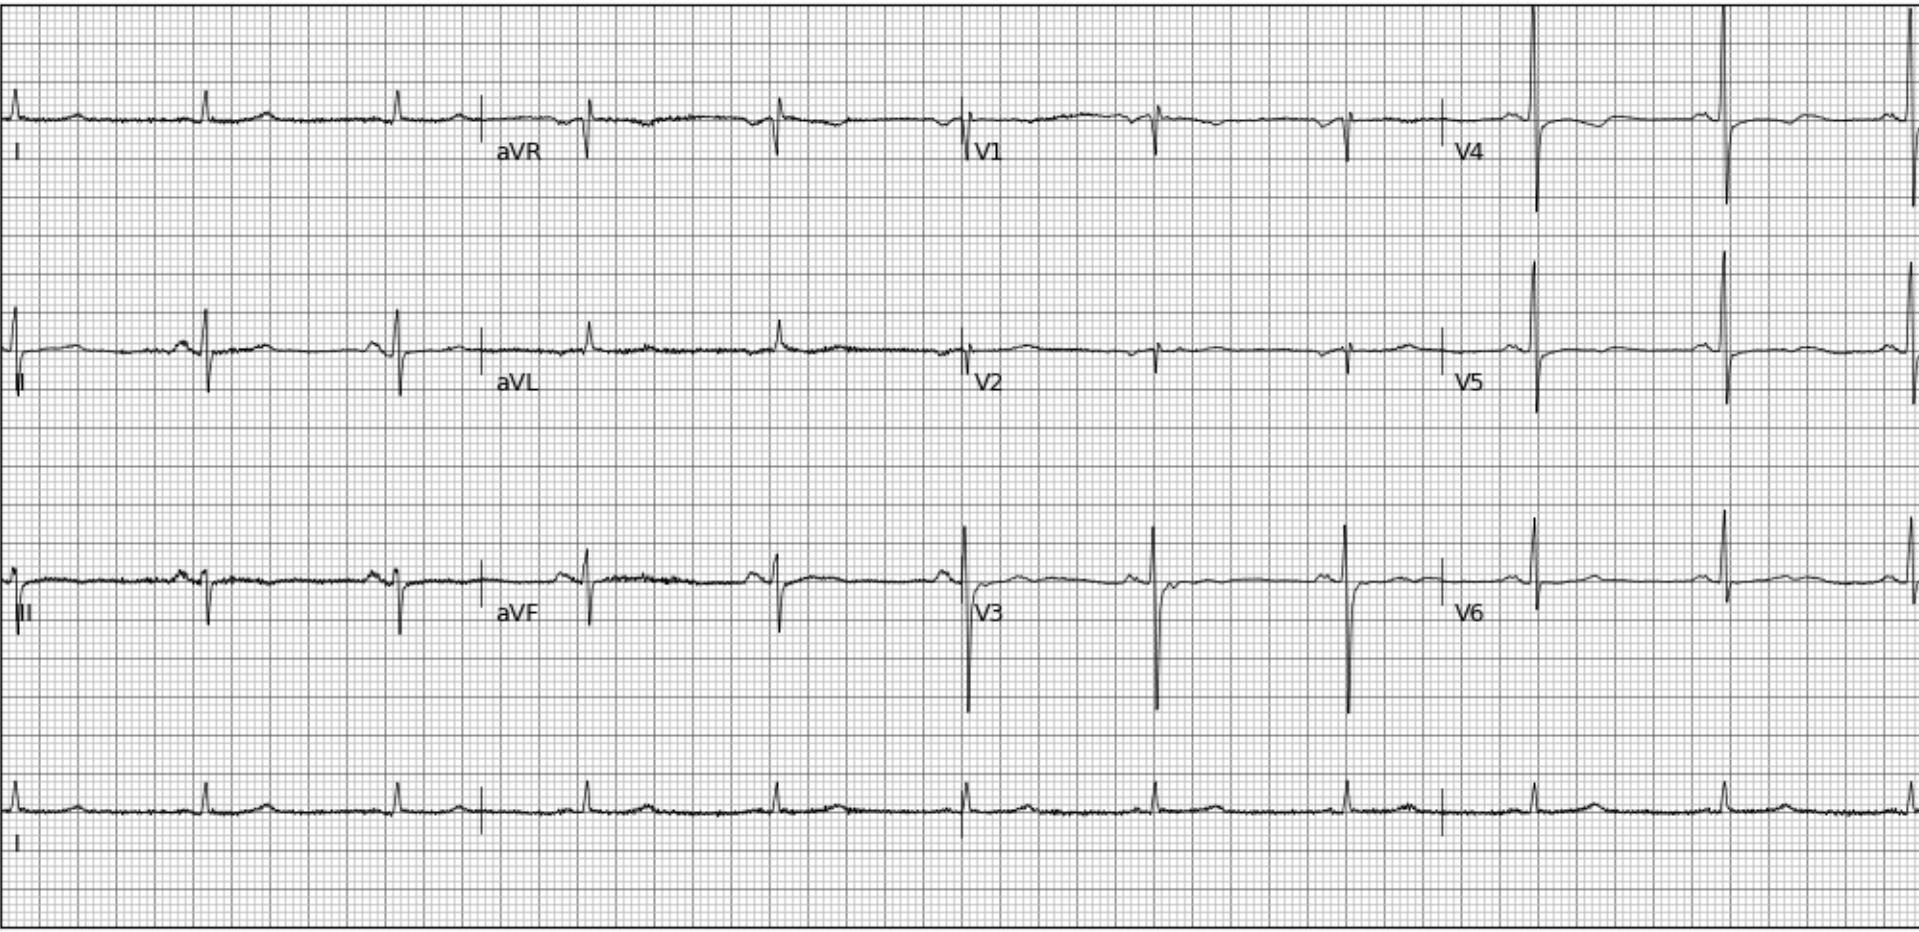

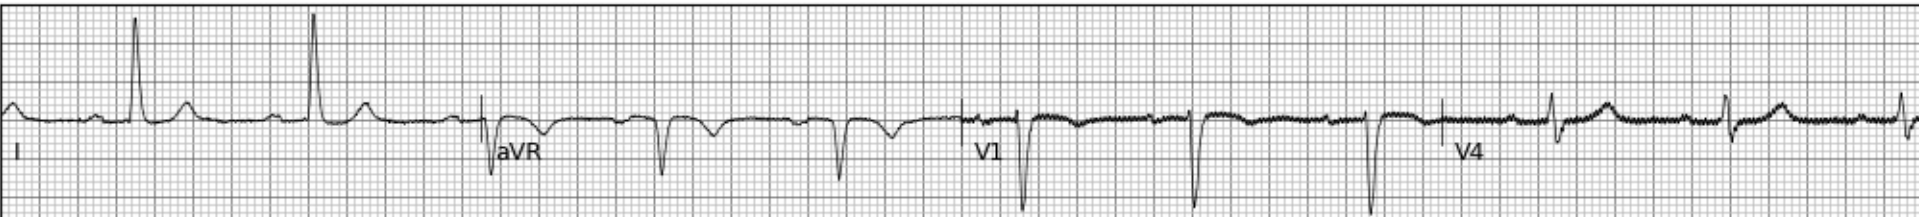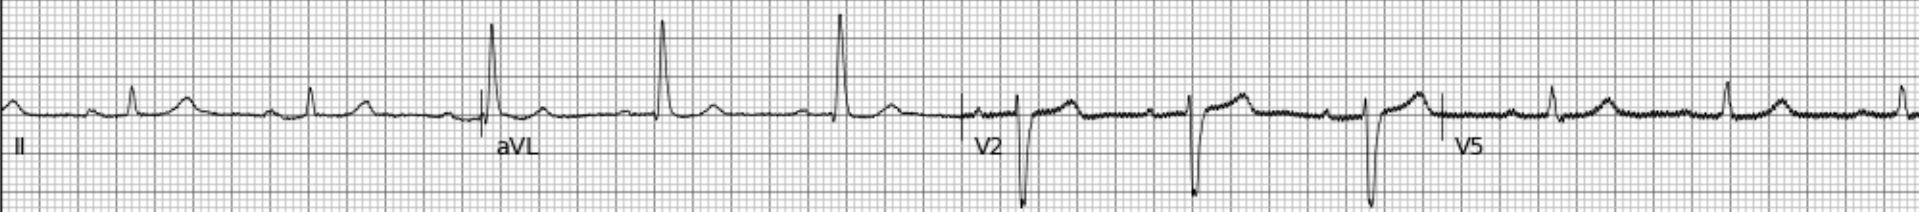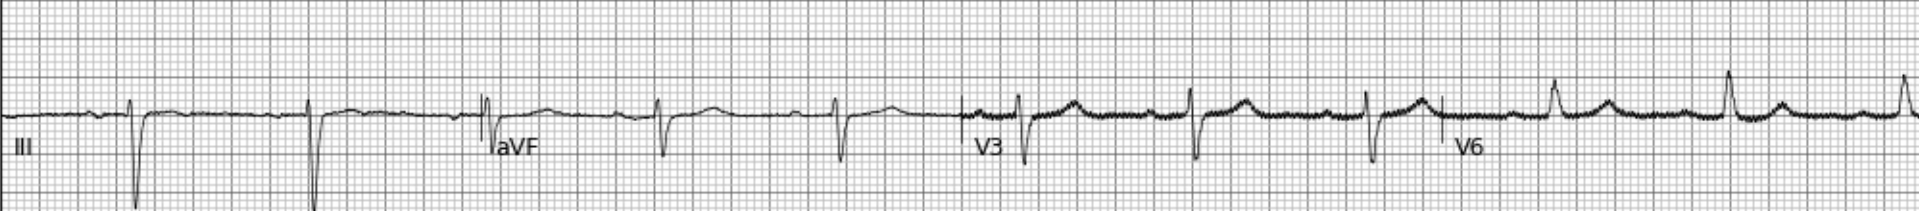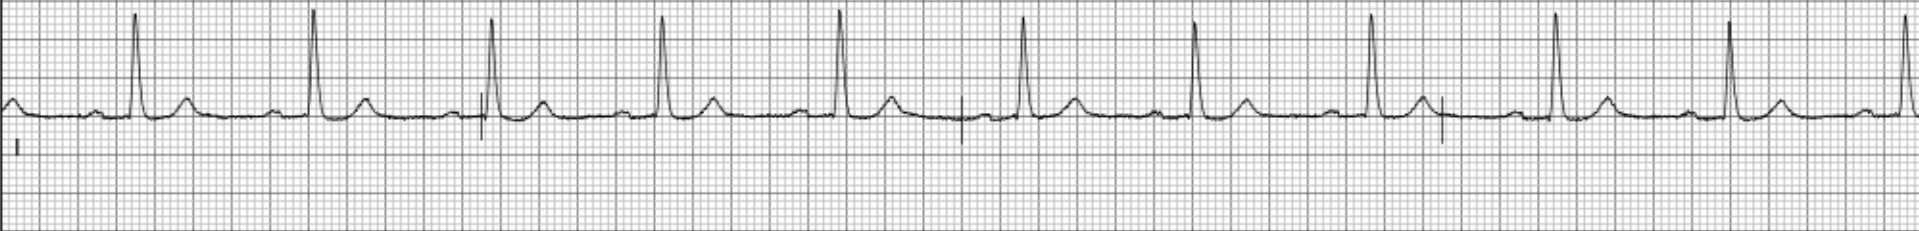

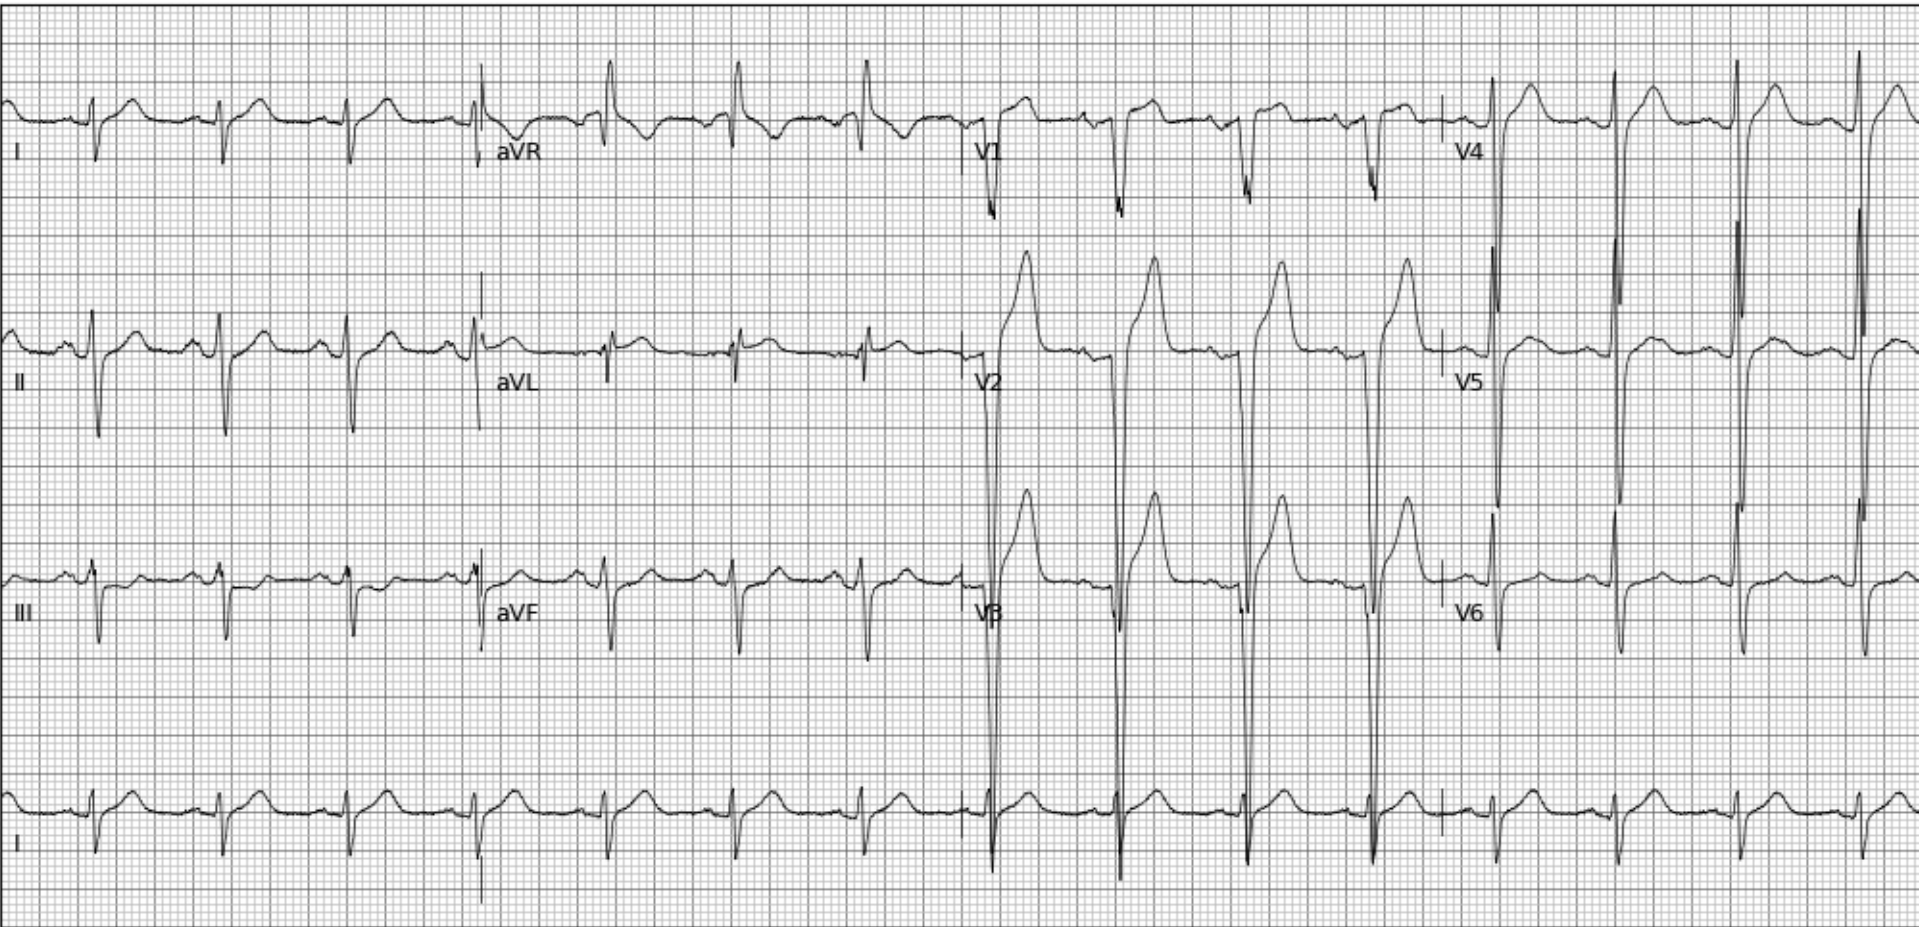

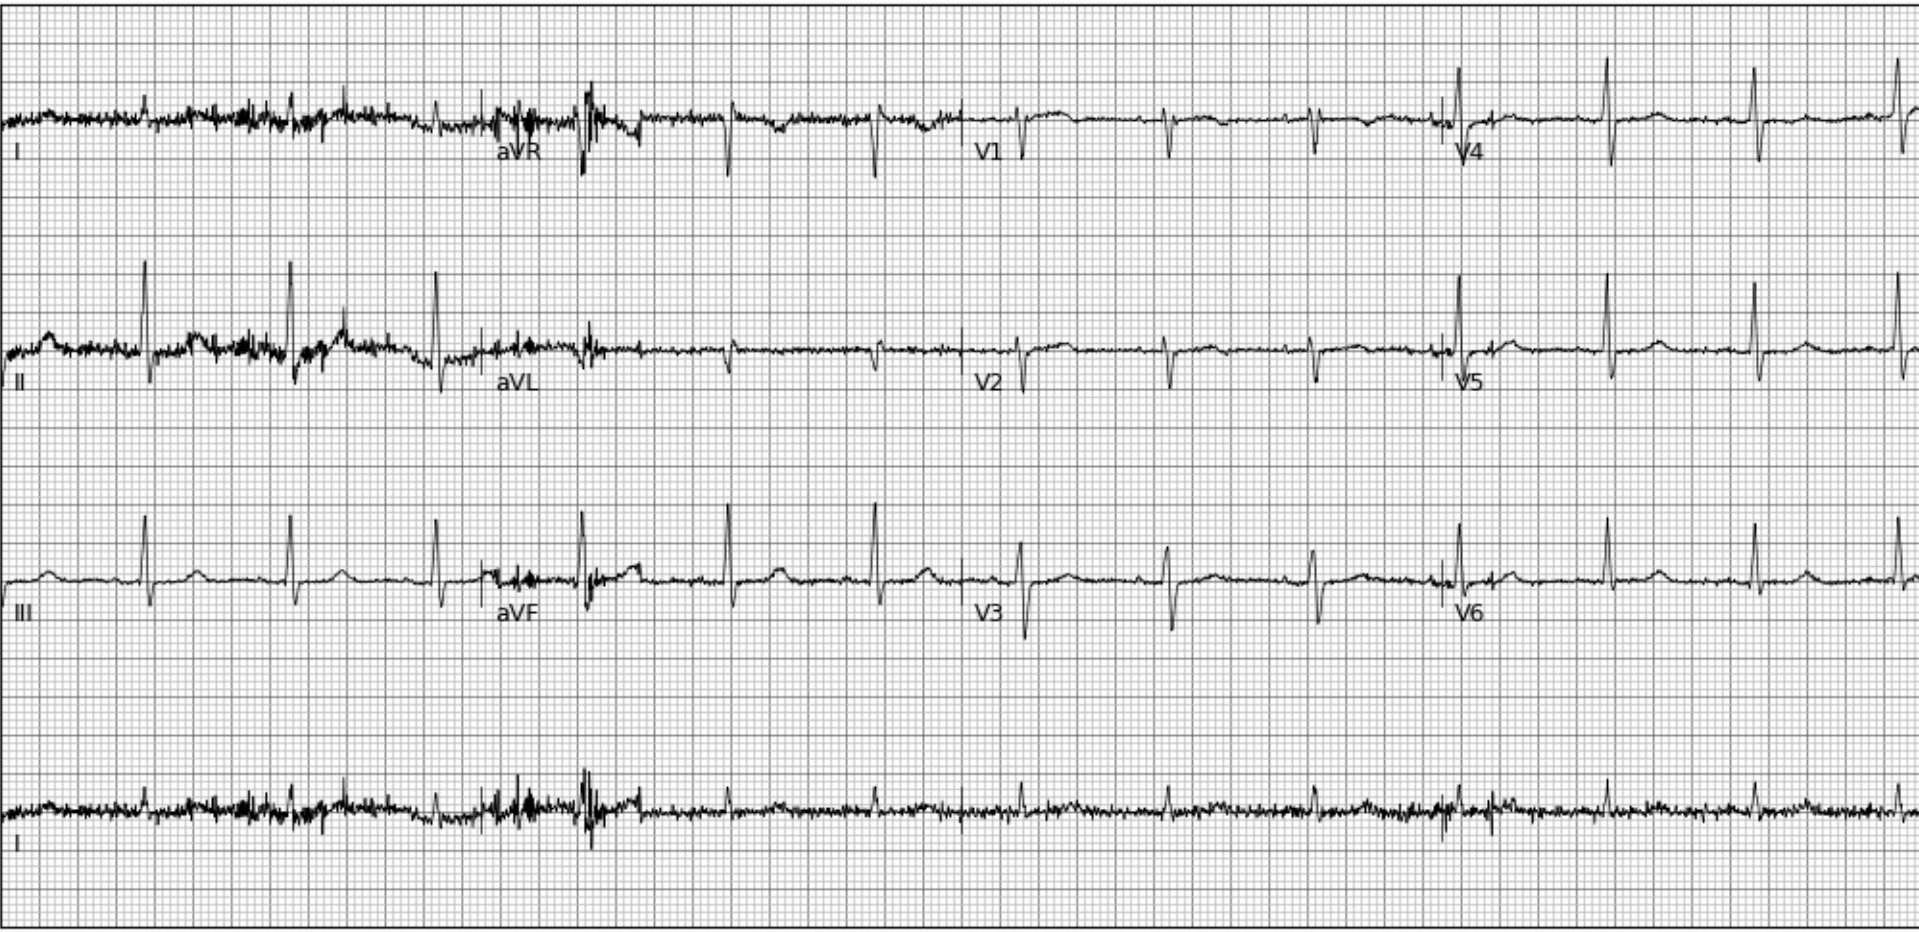



**Section 3. Random examples of 25 electrocardiogram images plotted in novel format (Black-on-Red Standard) not encountered during model development**

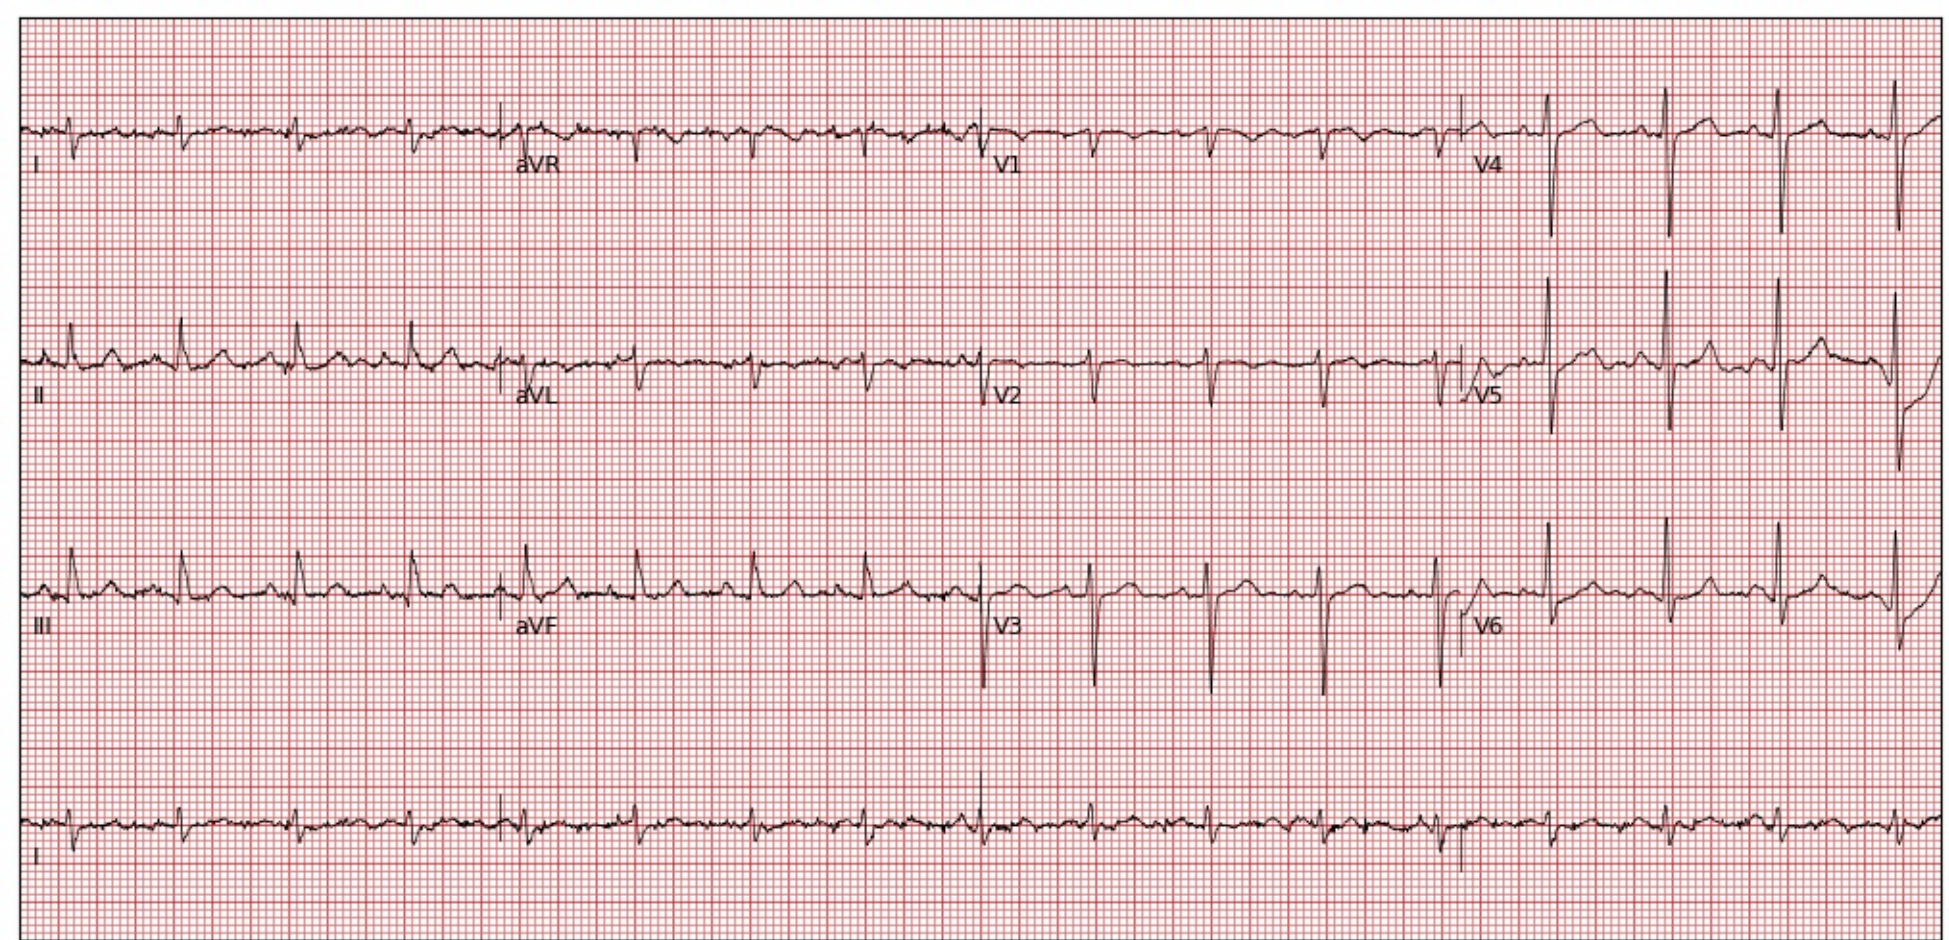



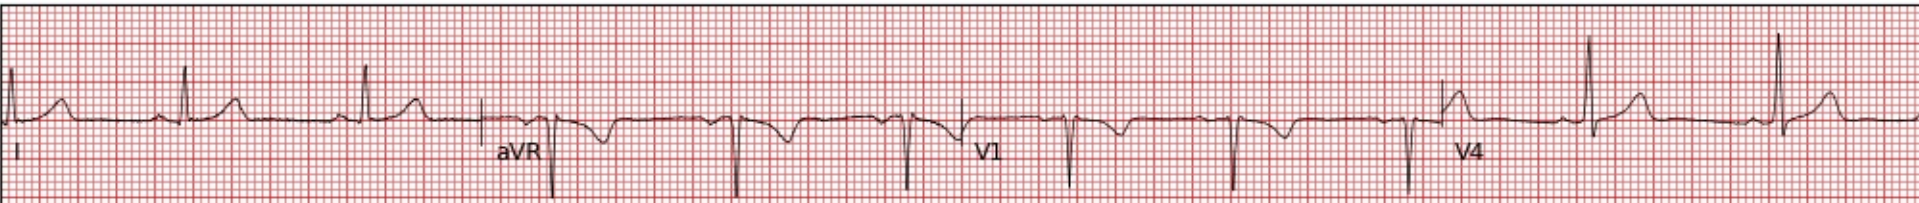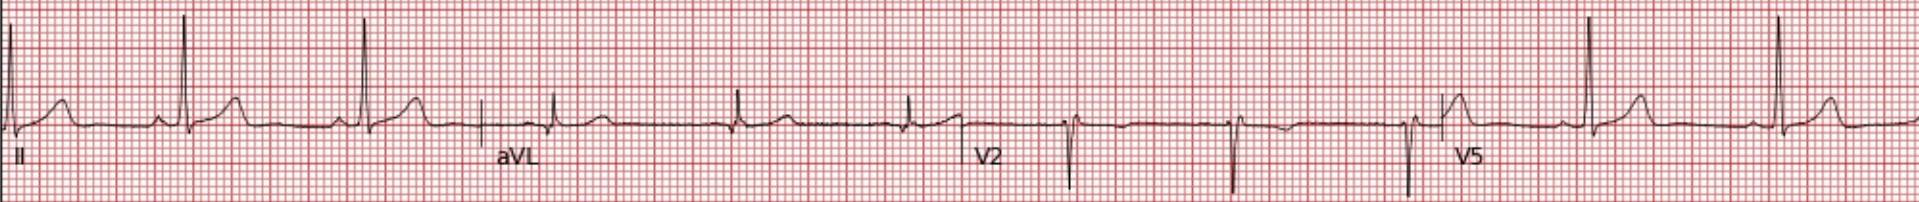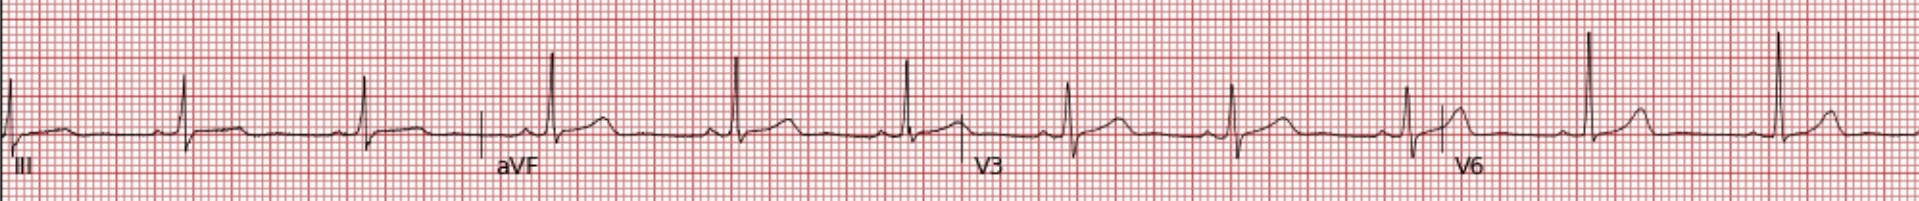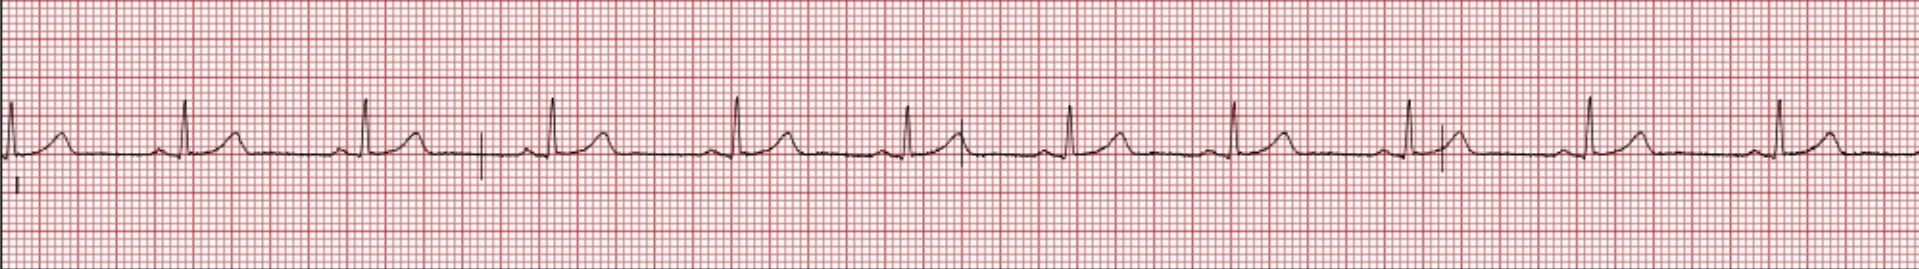



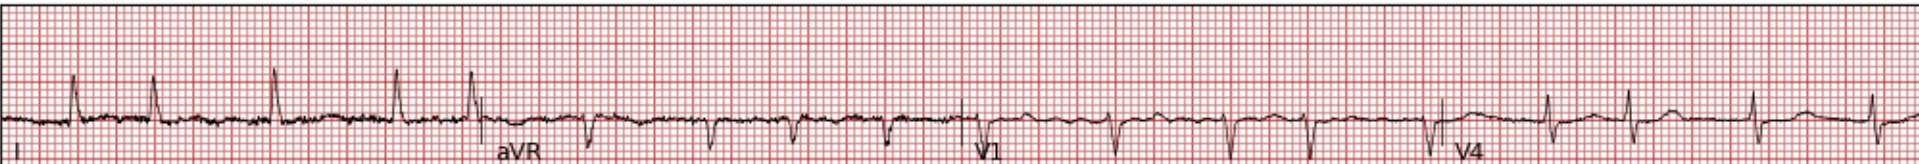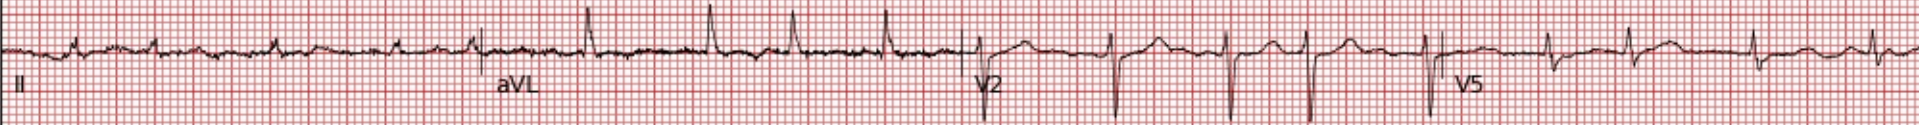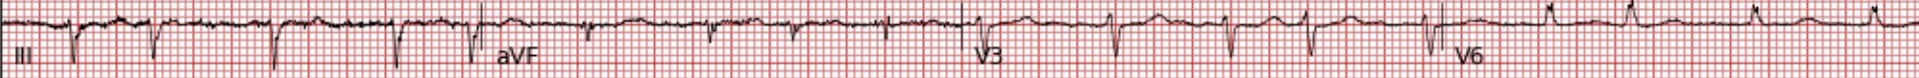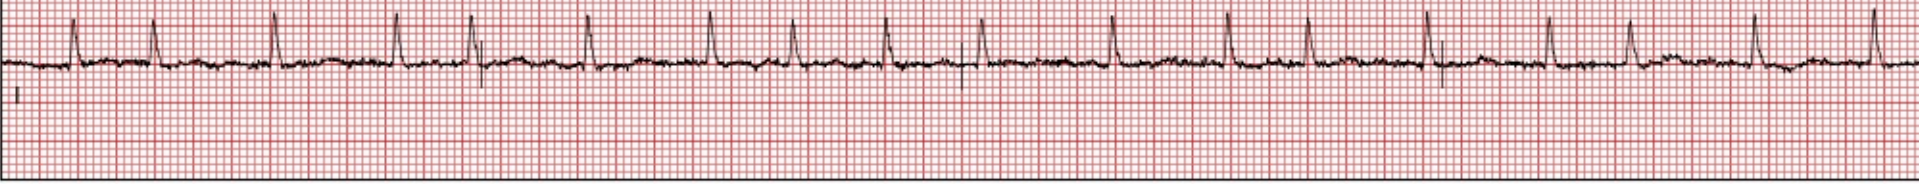



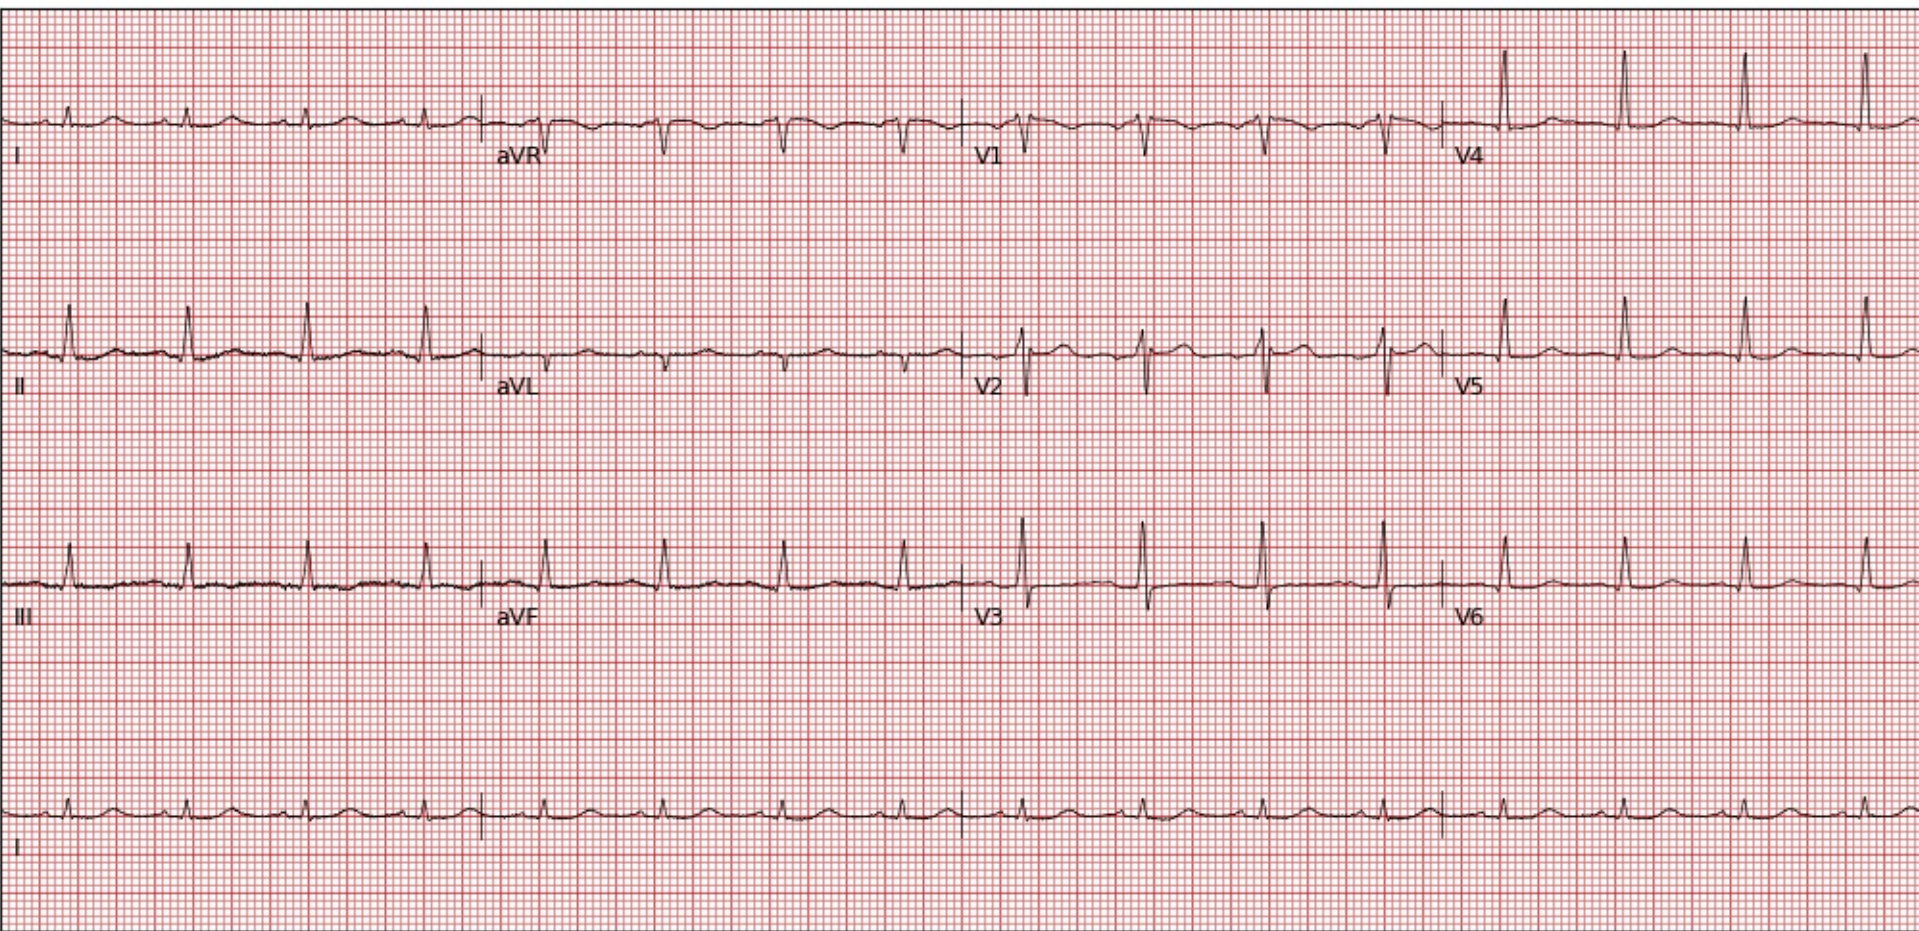



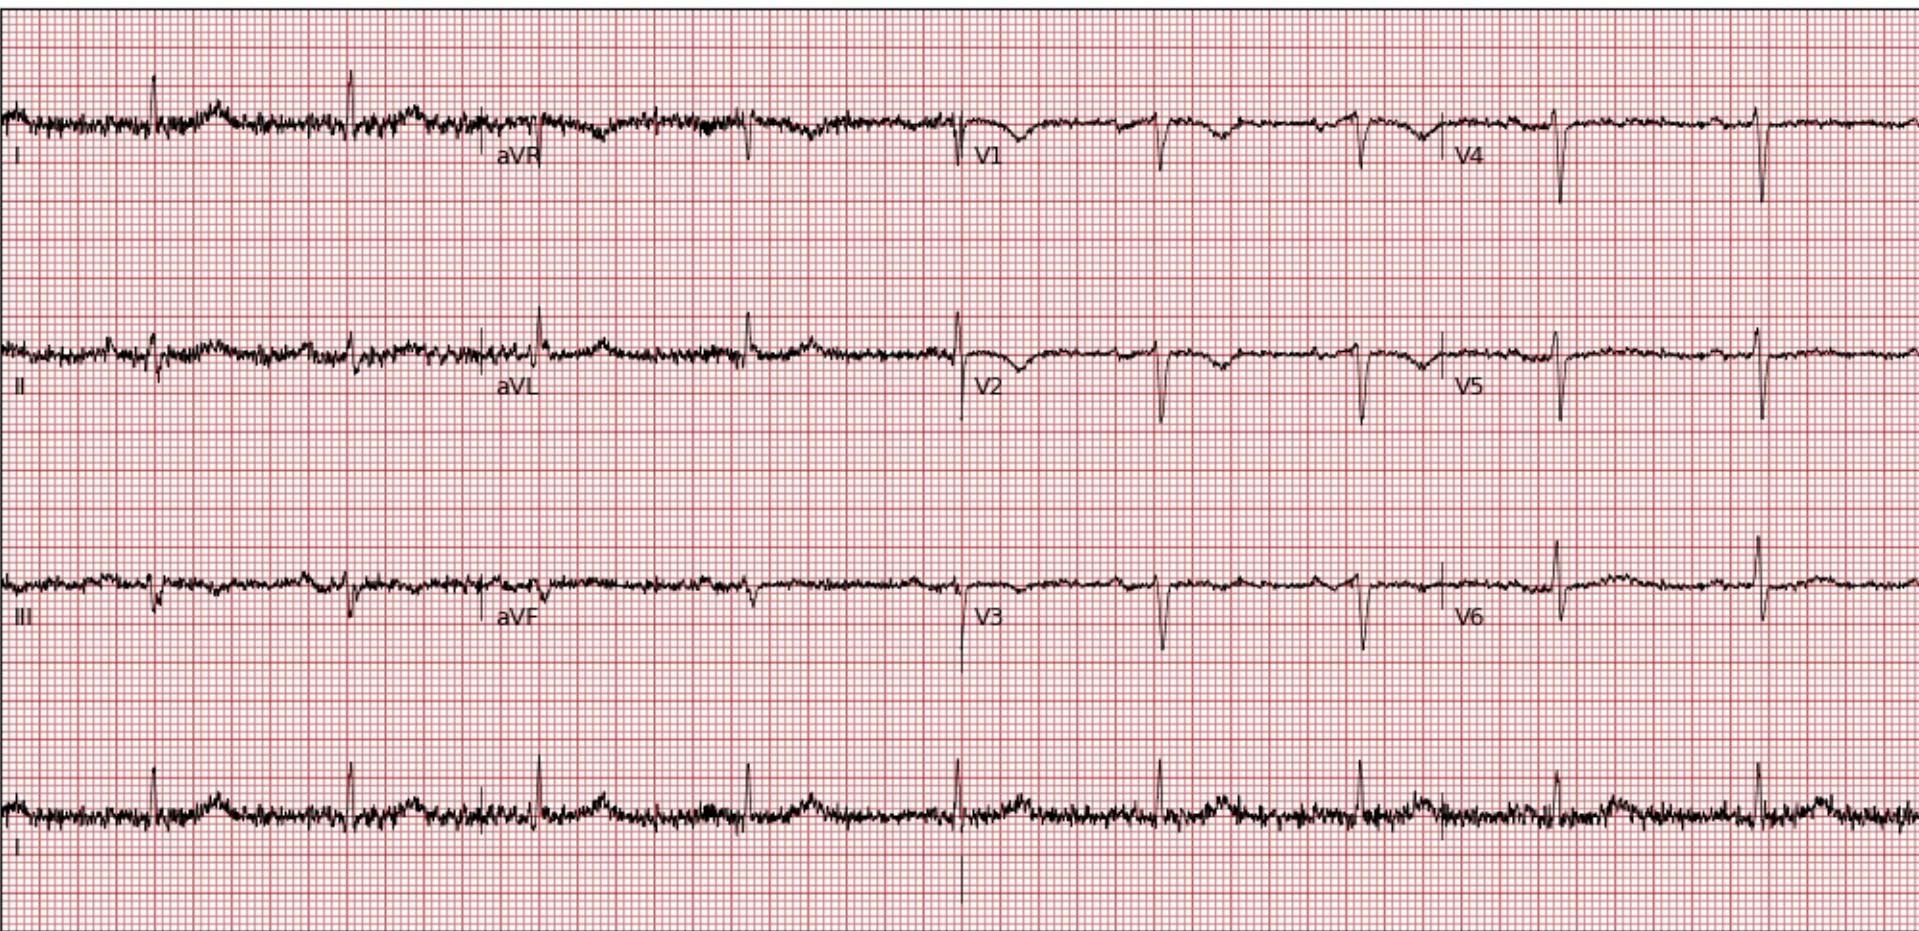



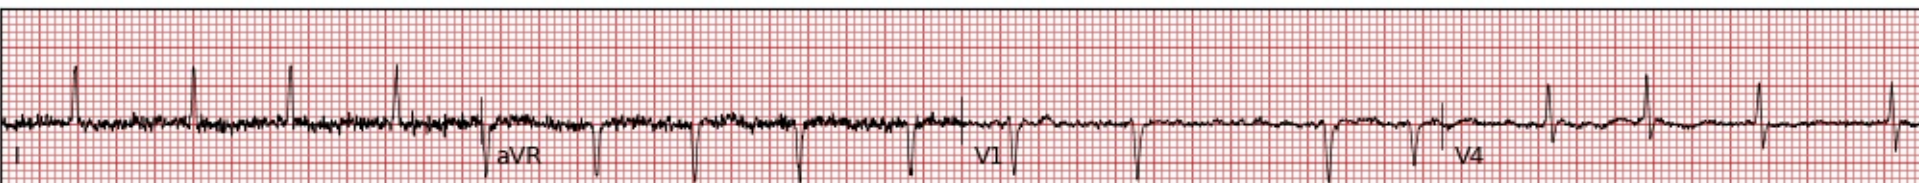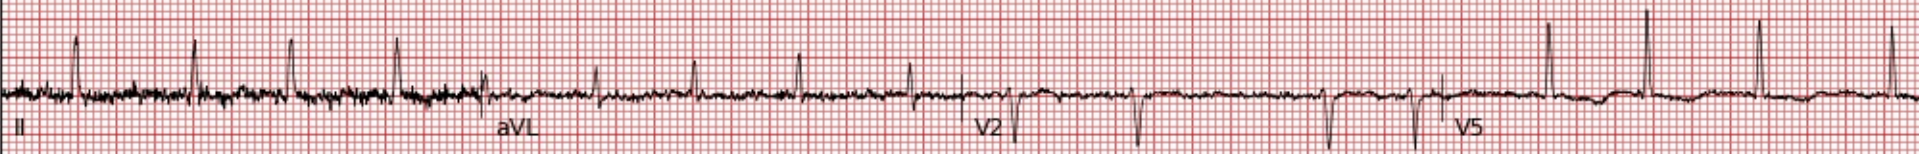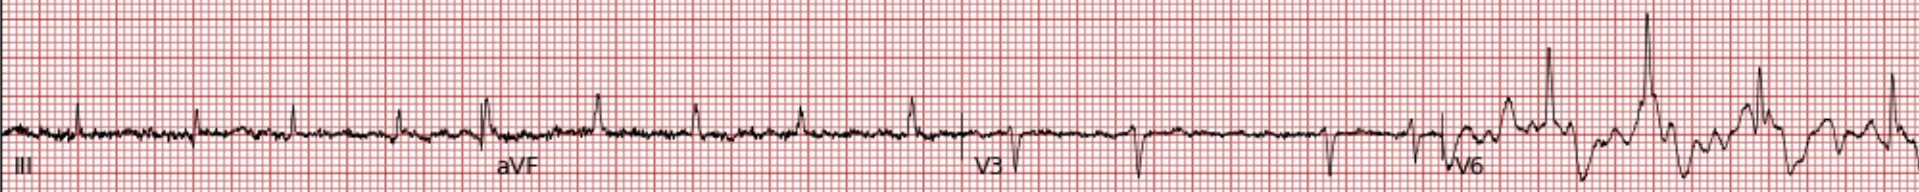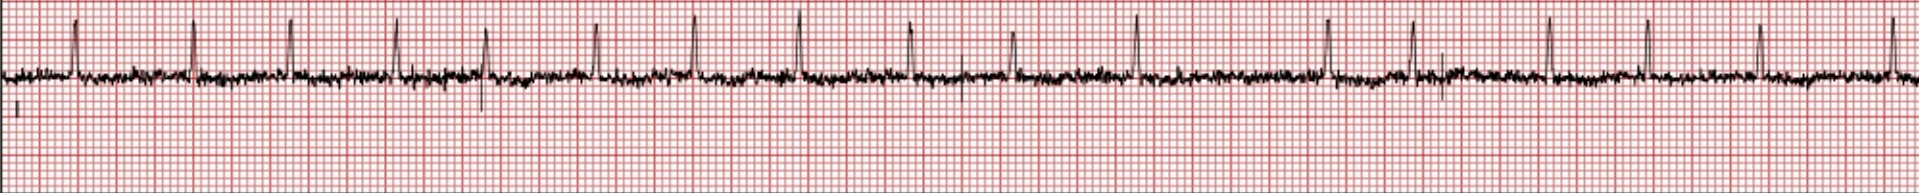



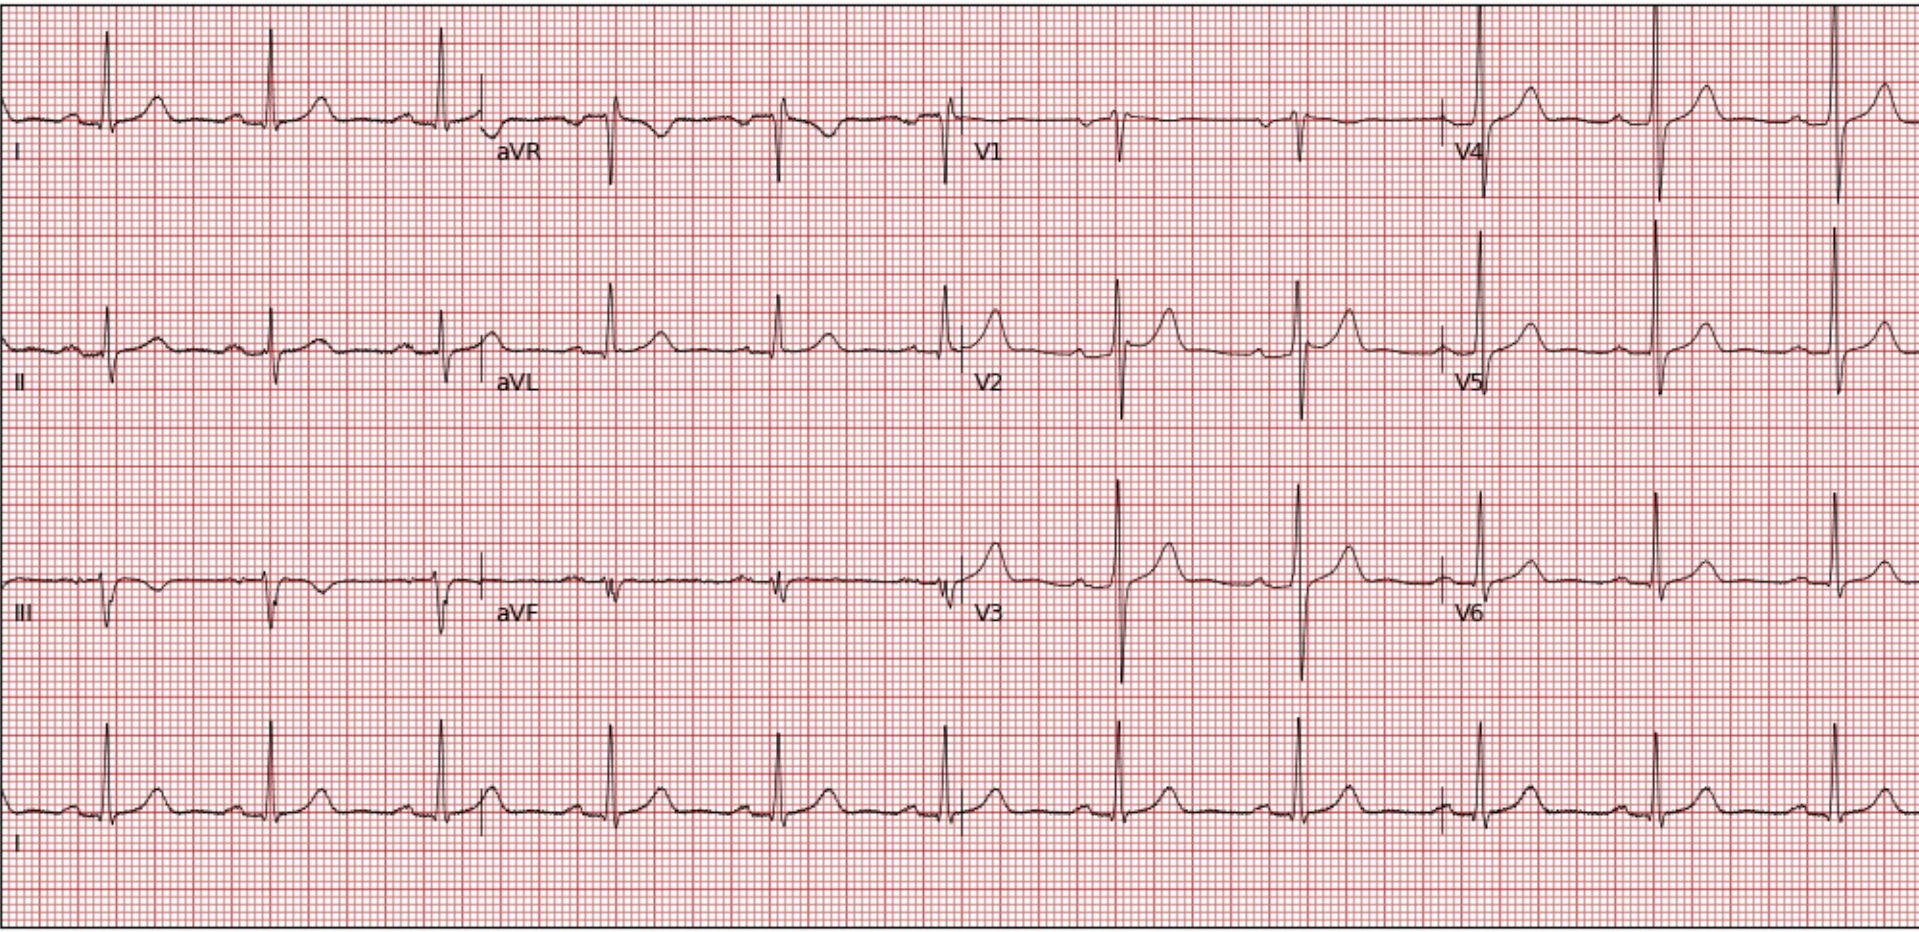



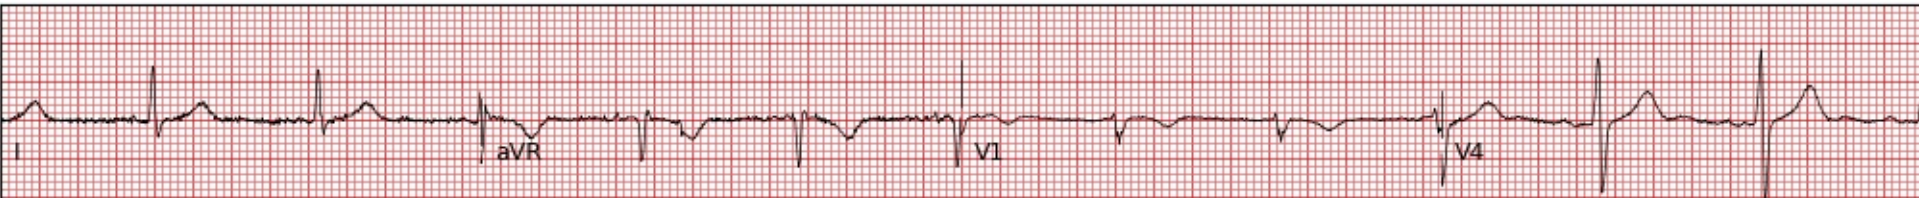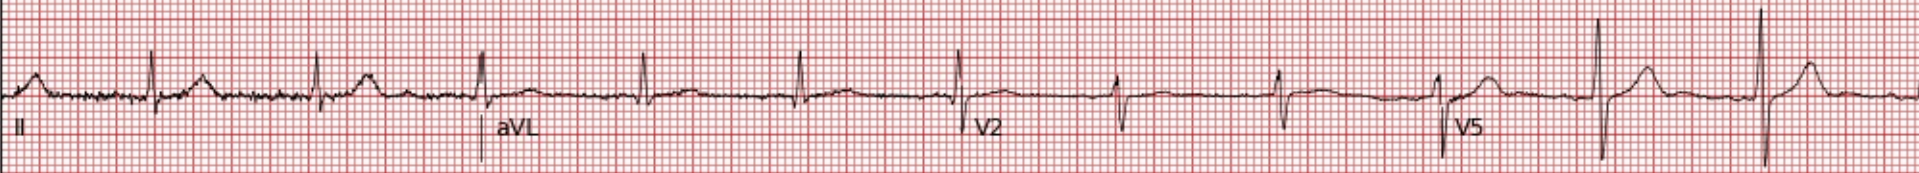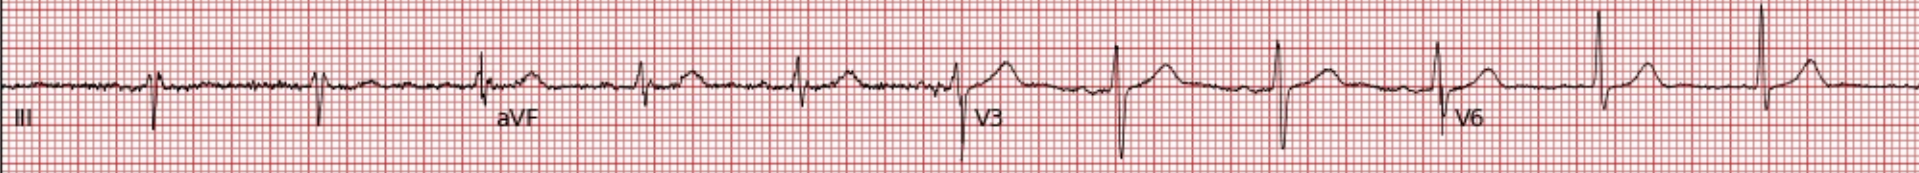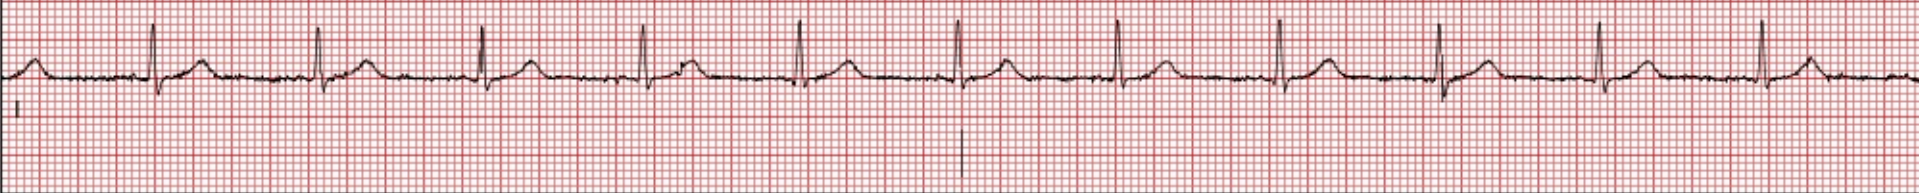



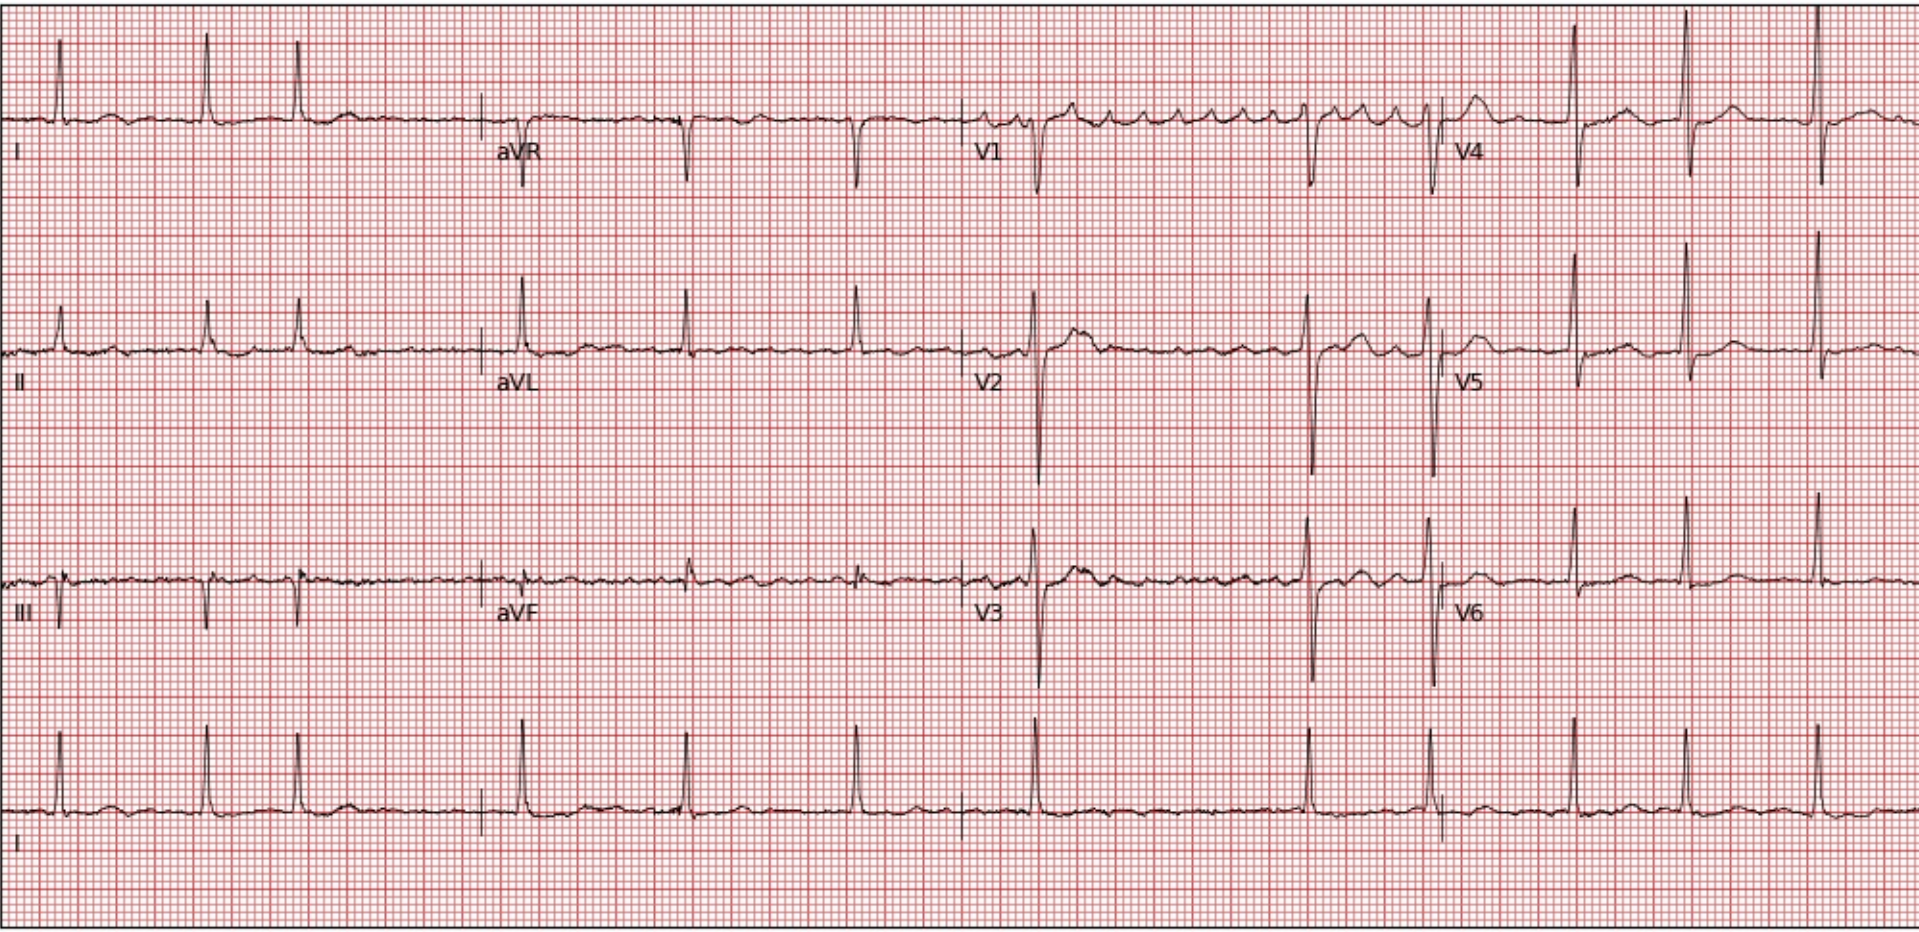



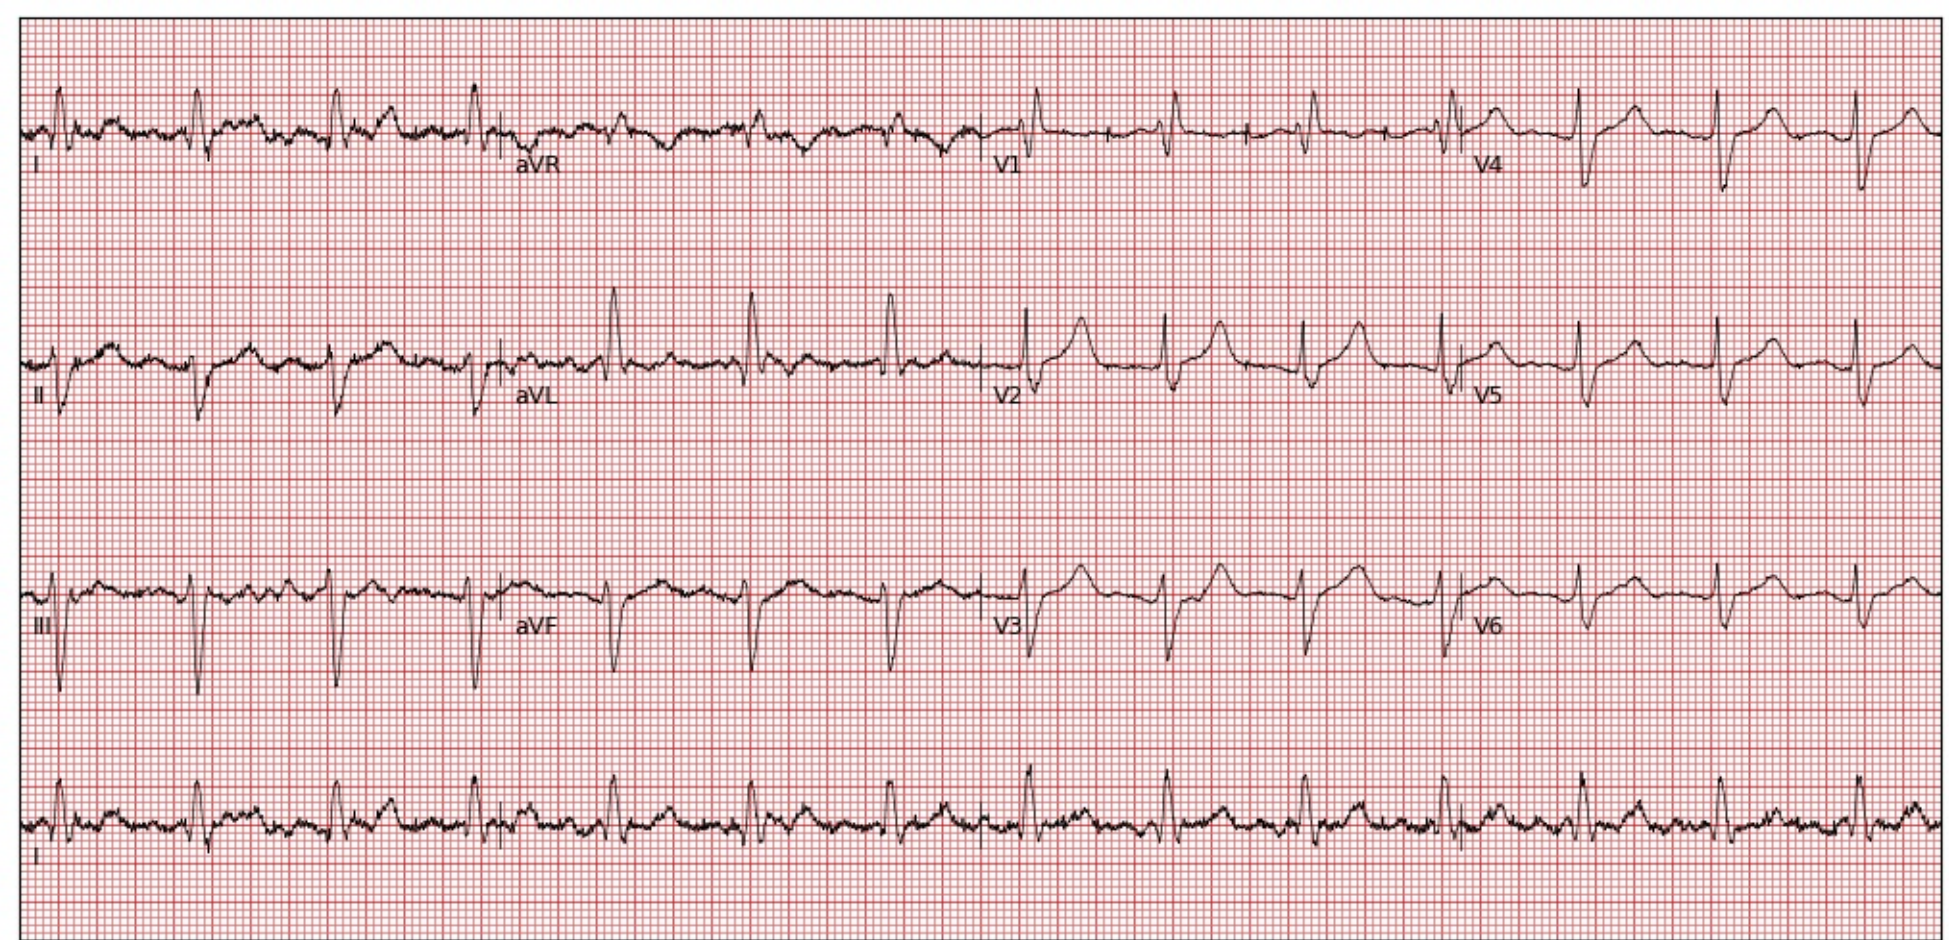



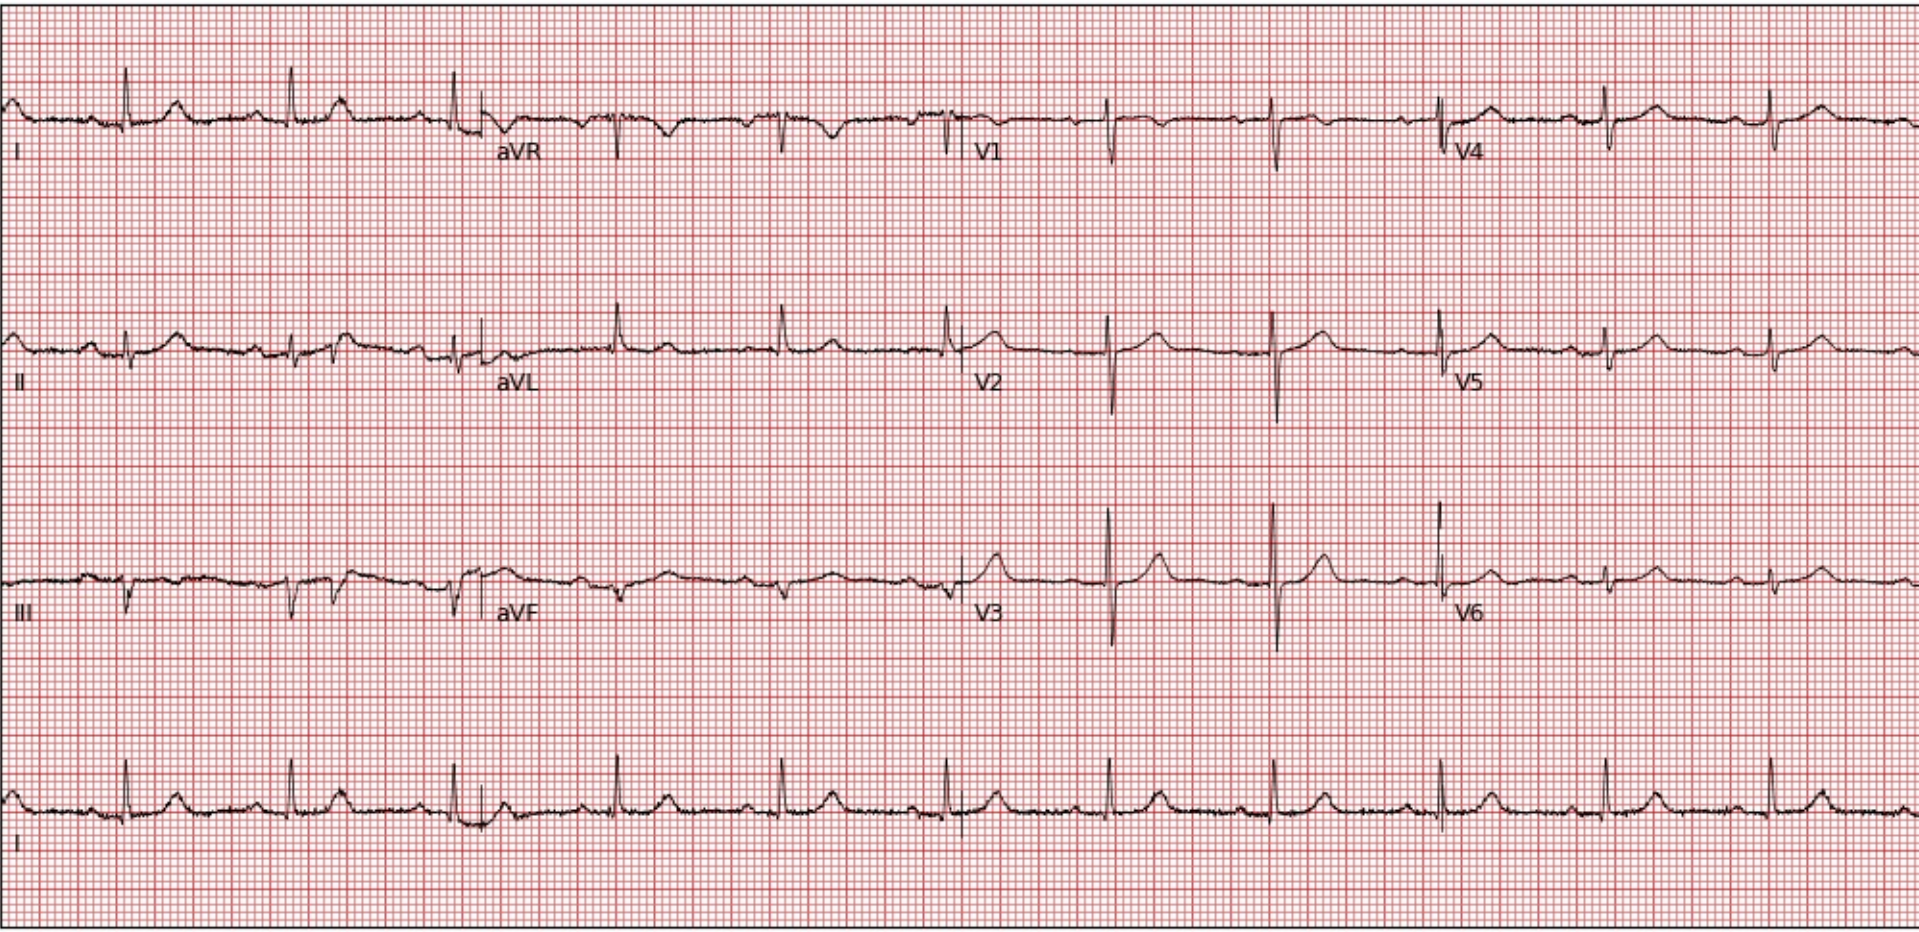



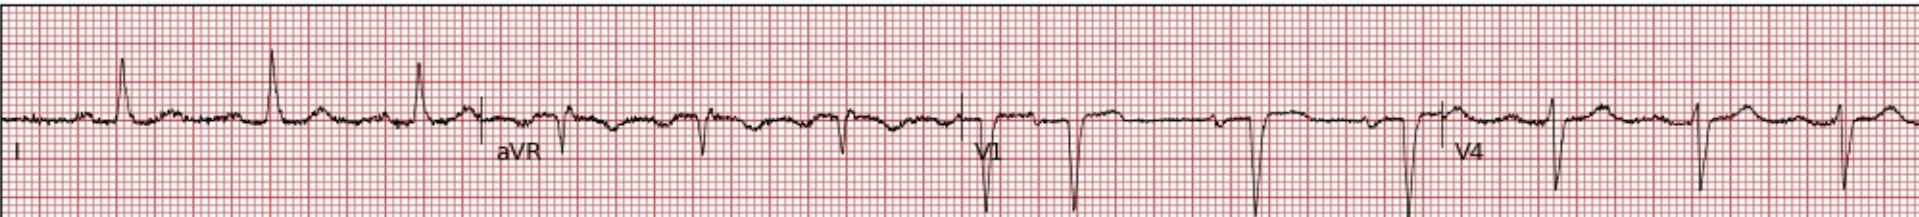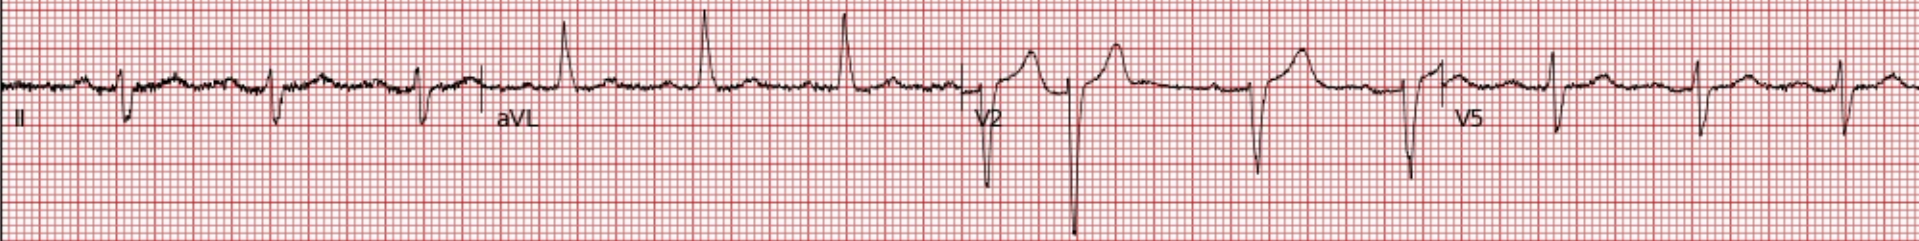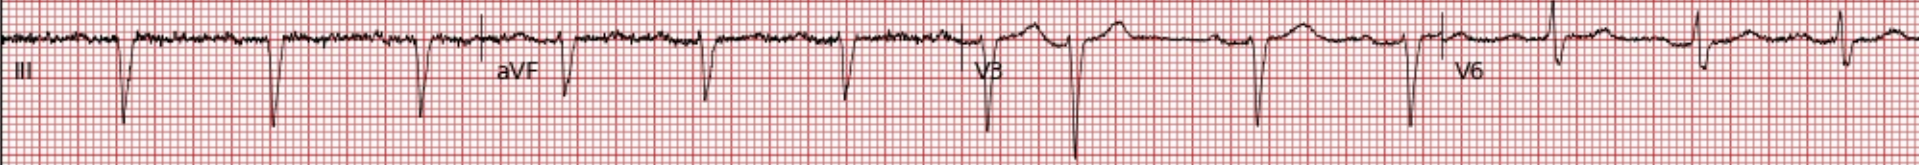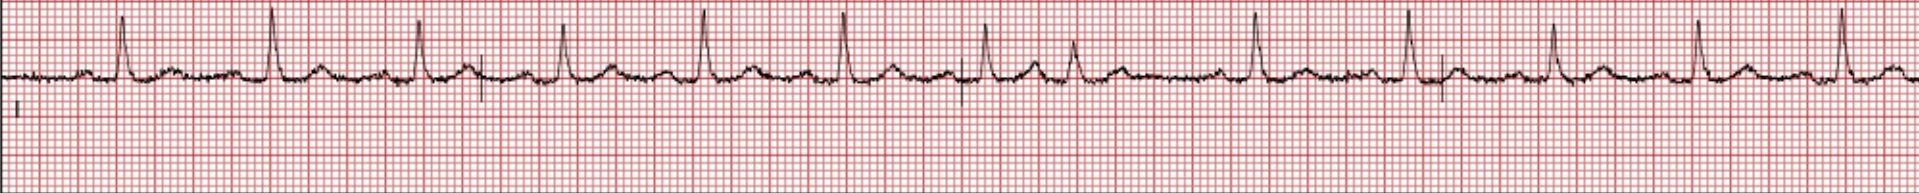



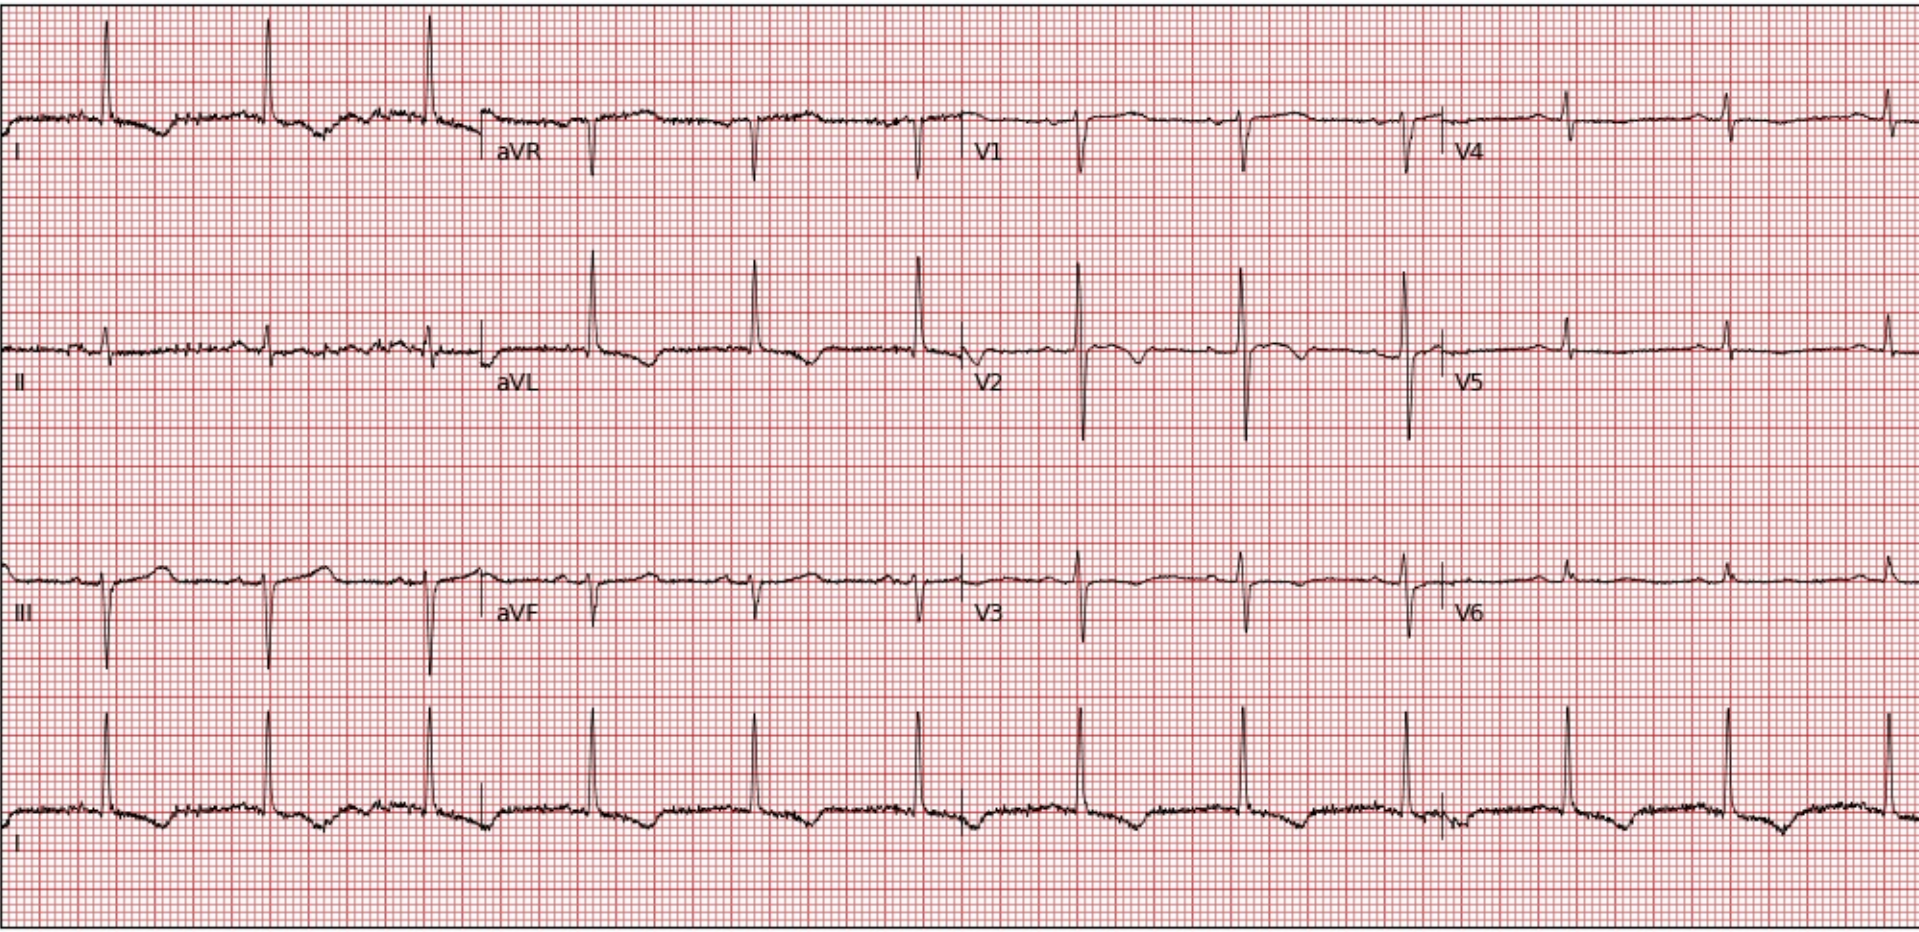



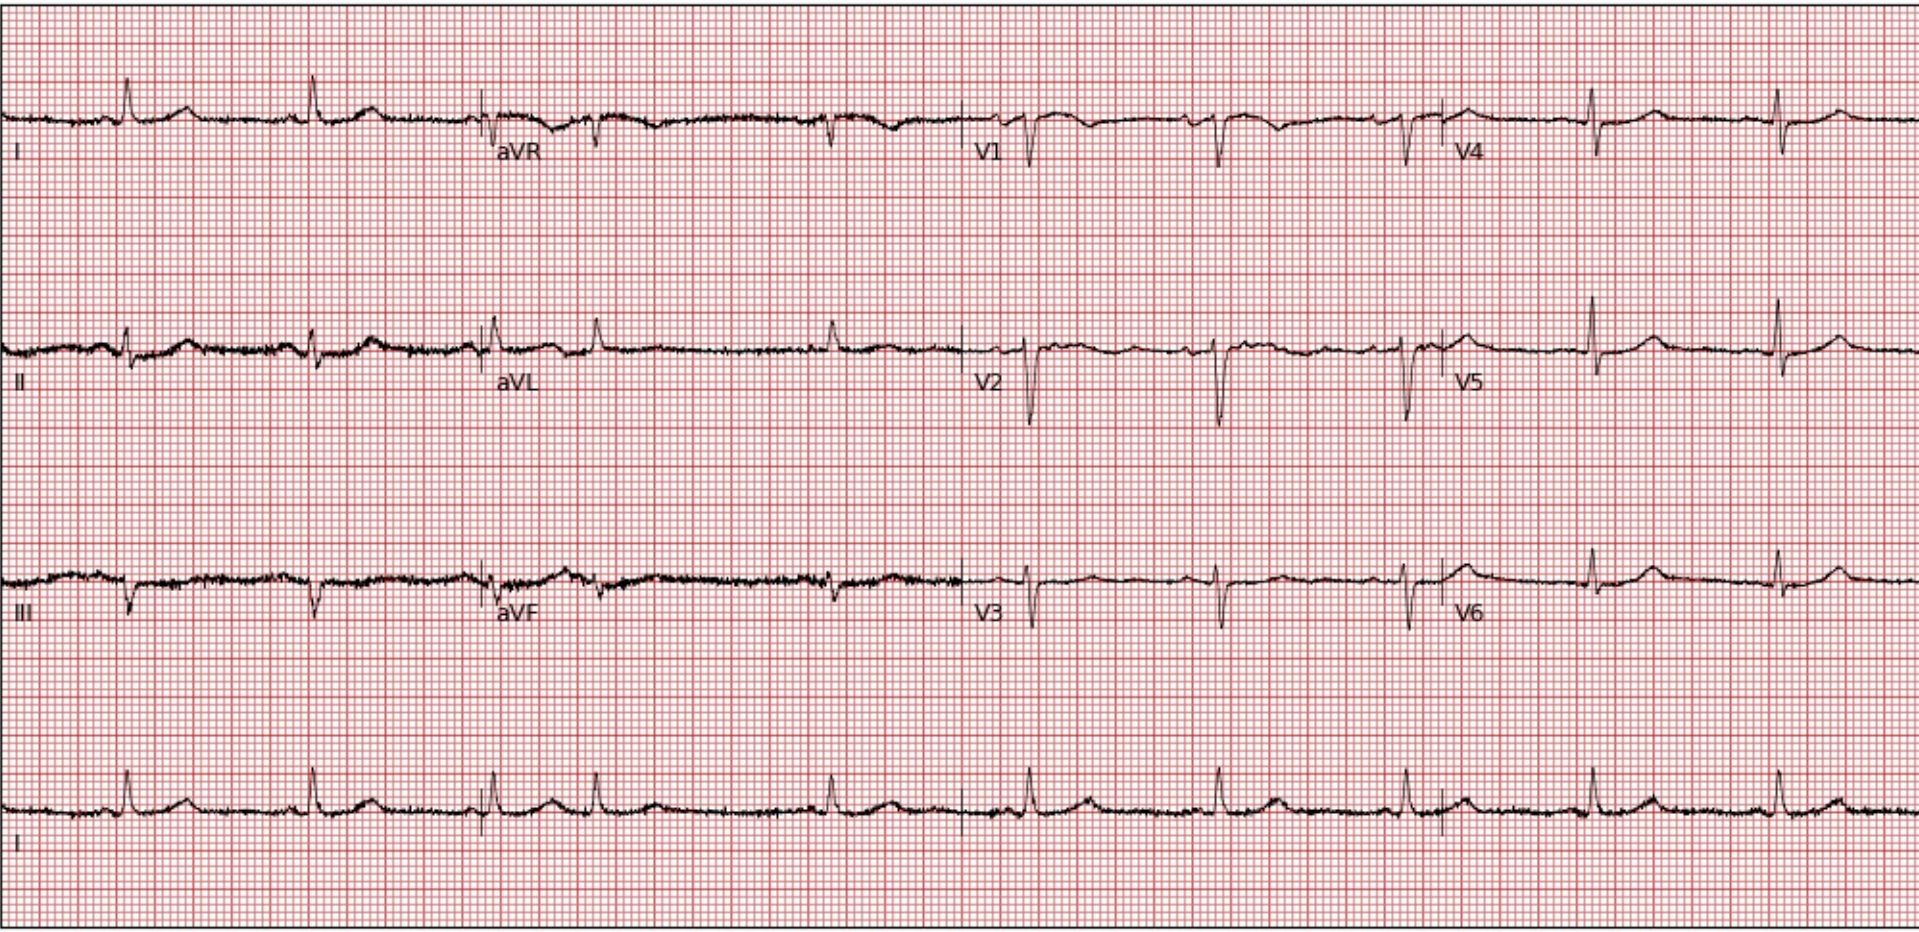



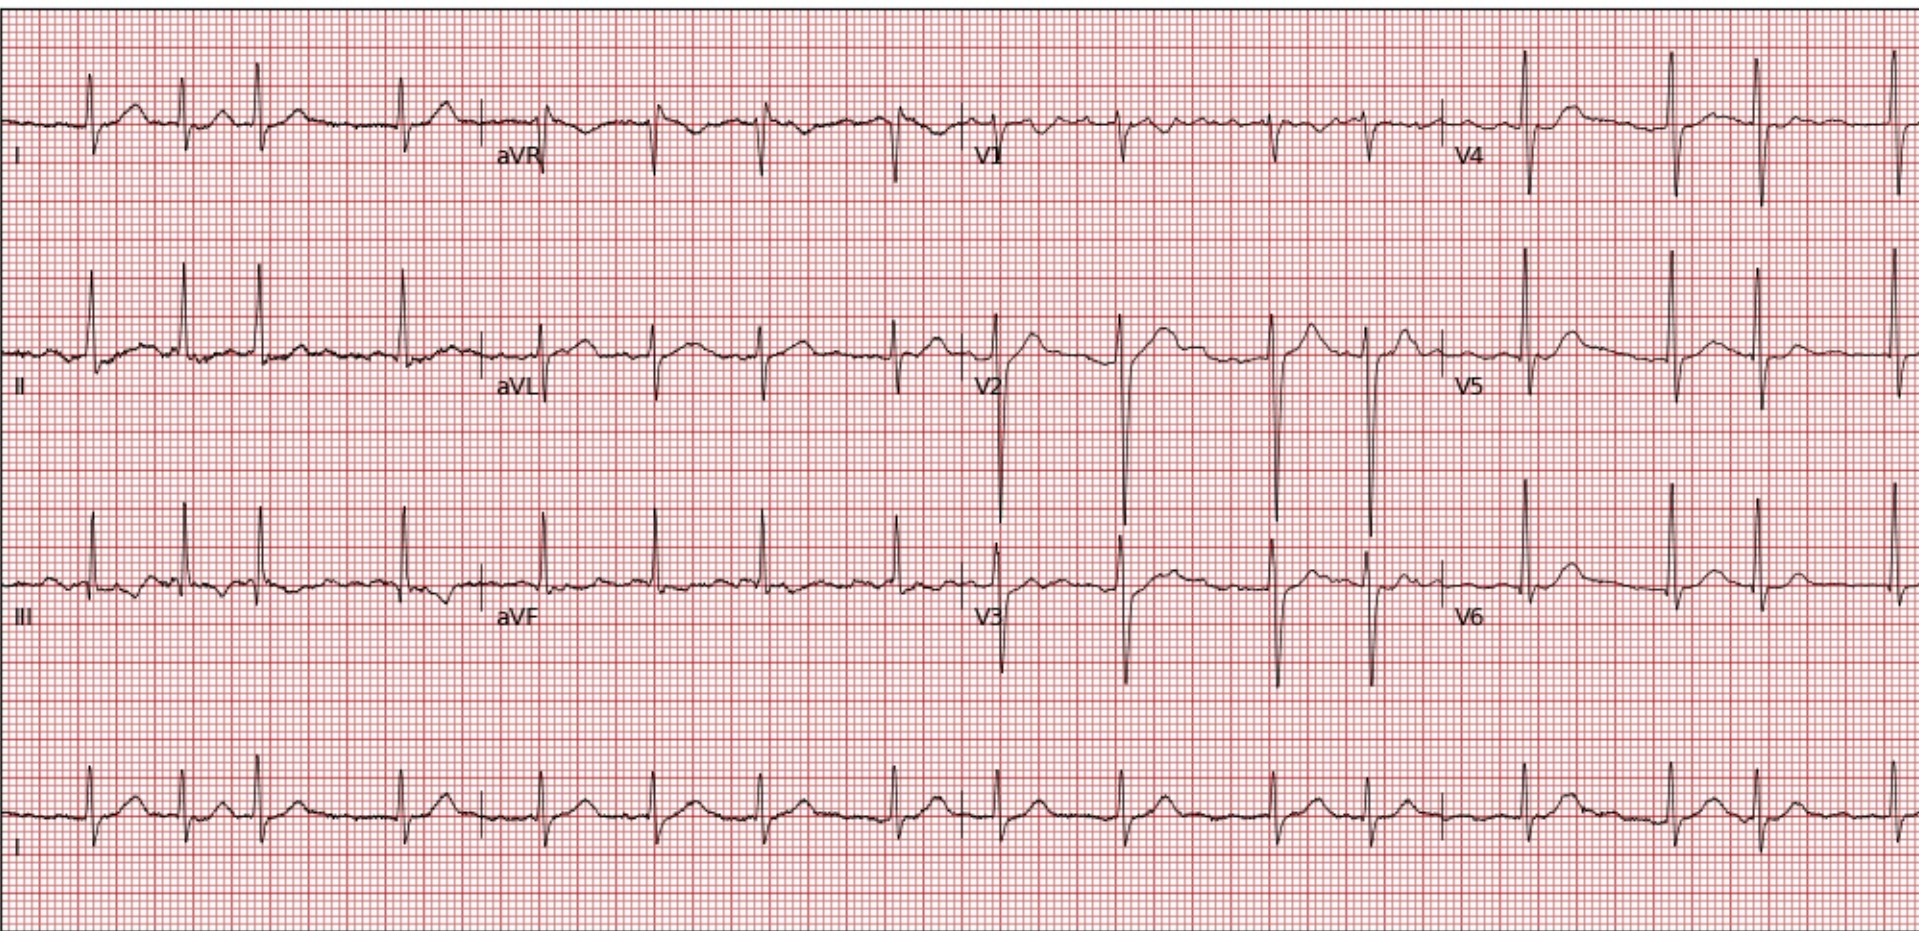



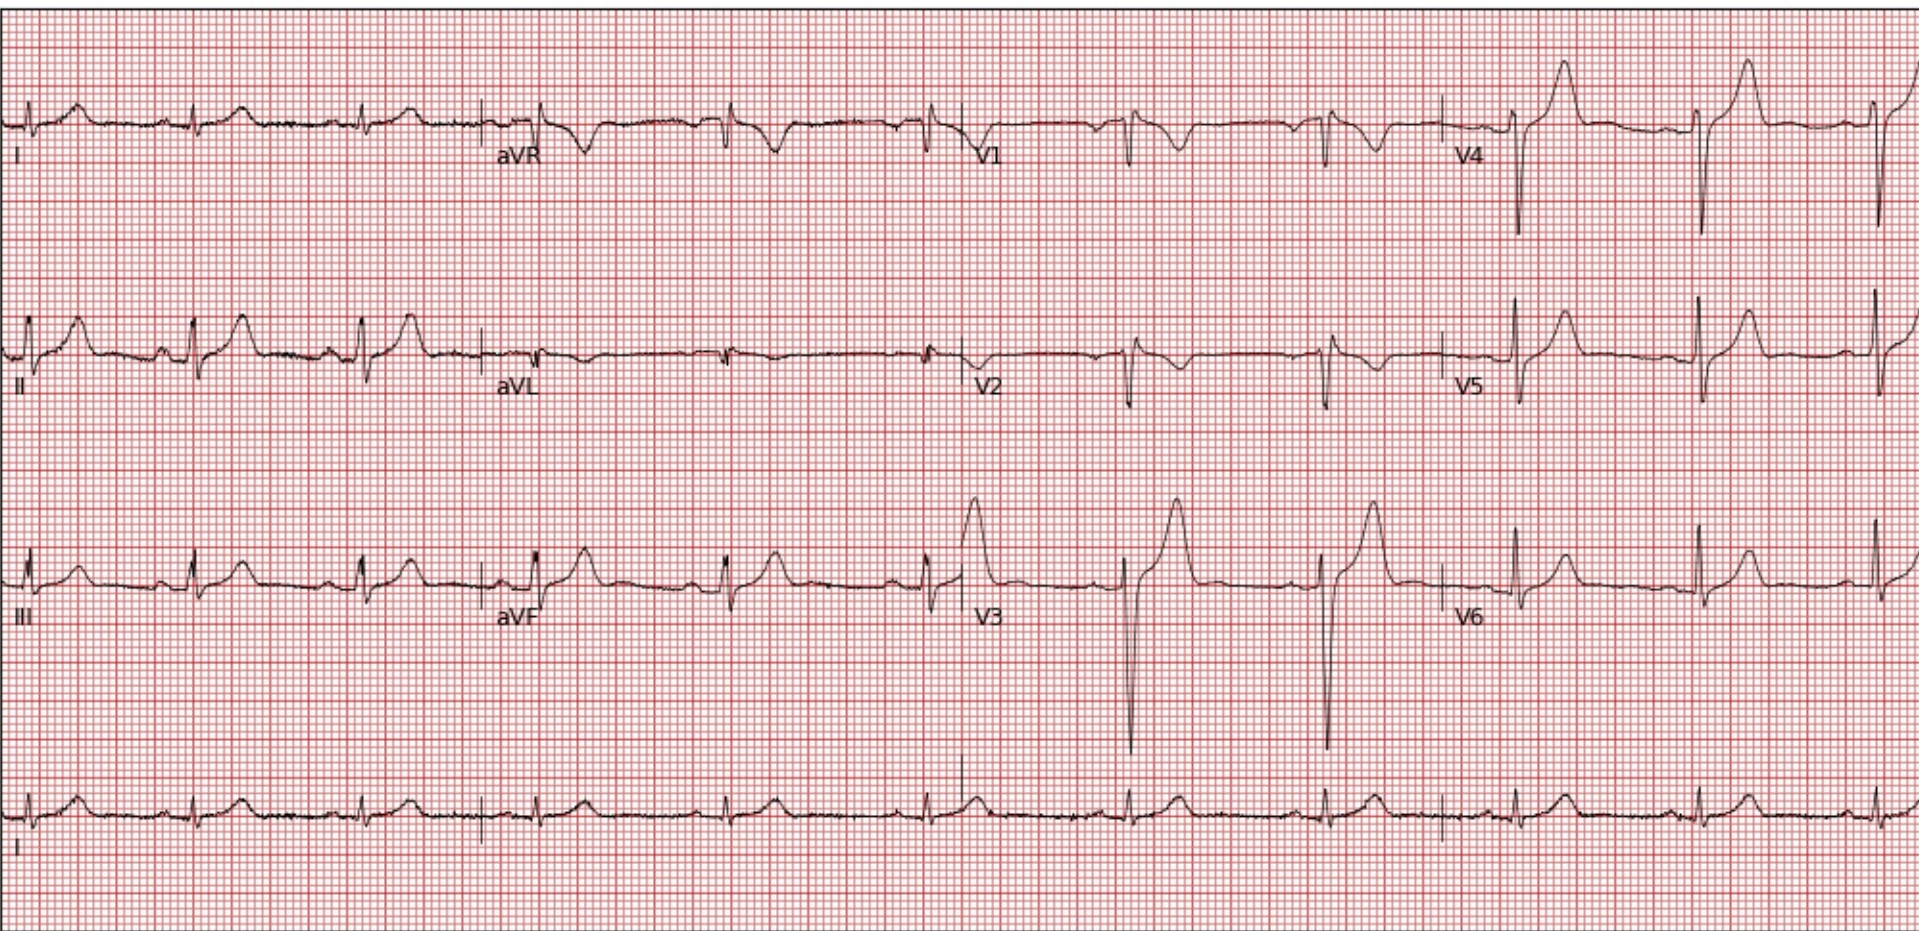



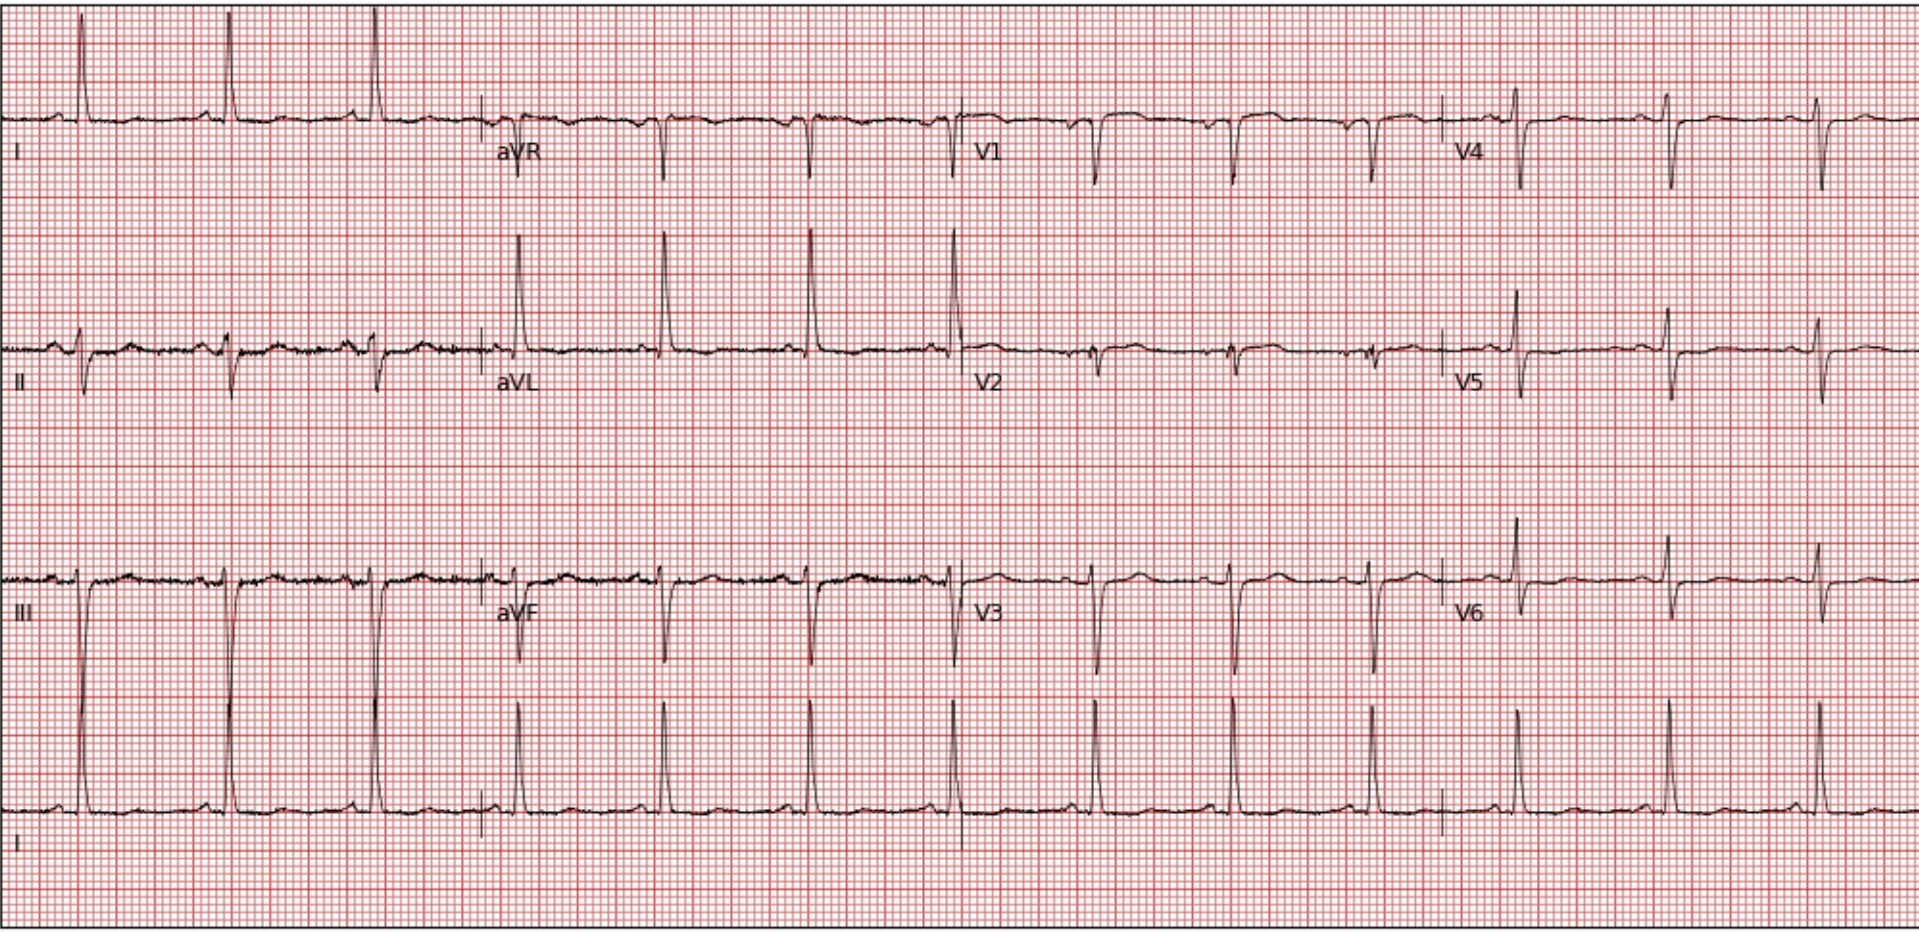



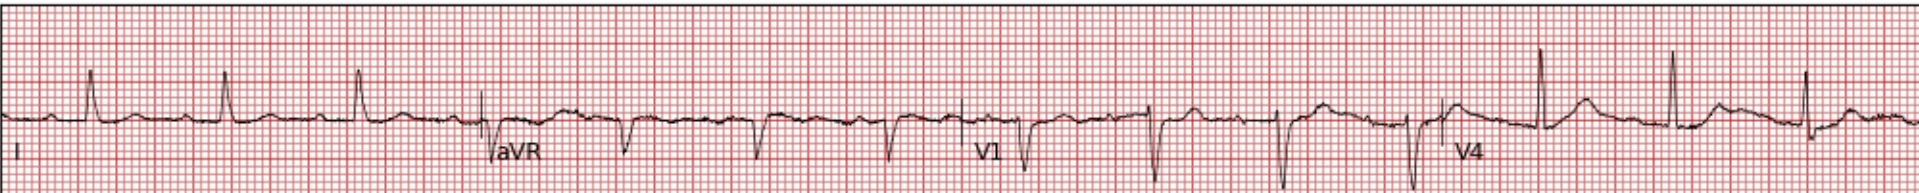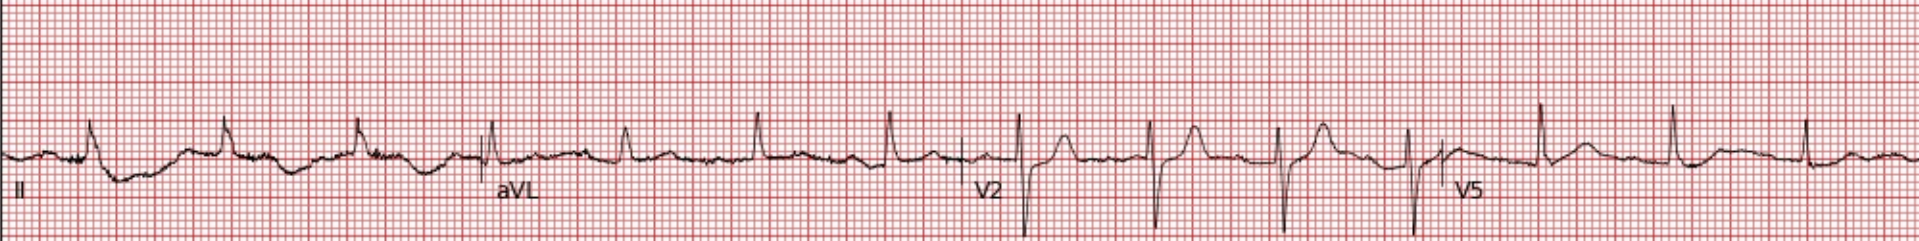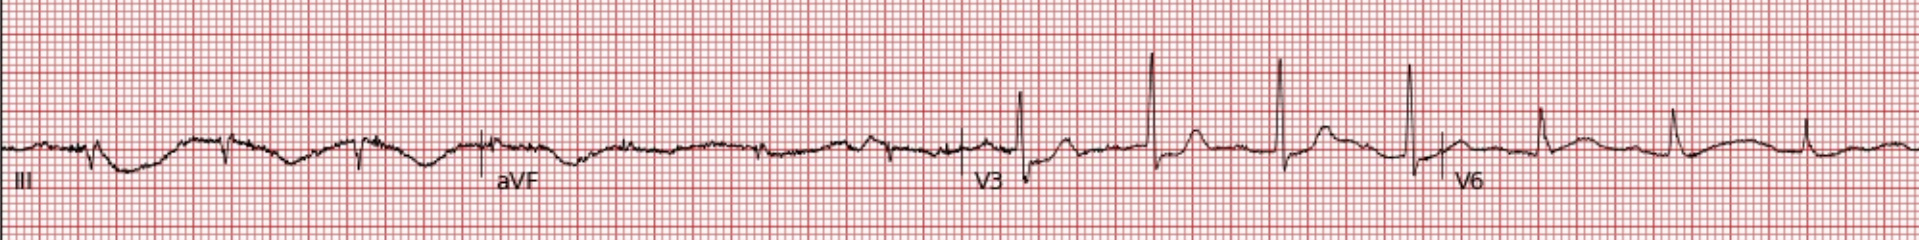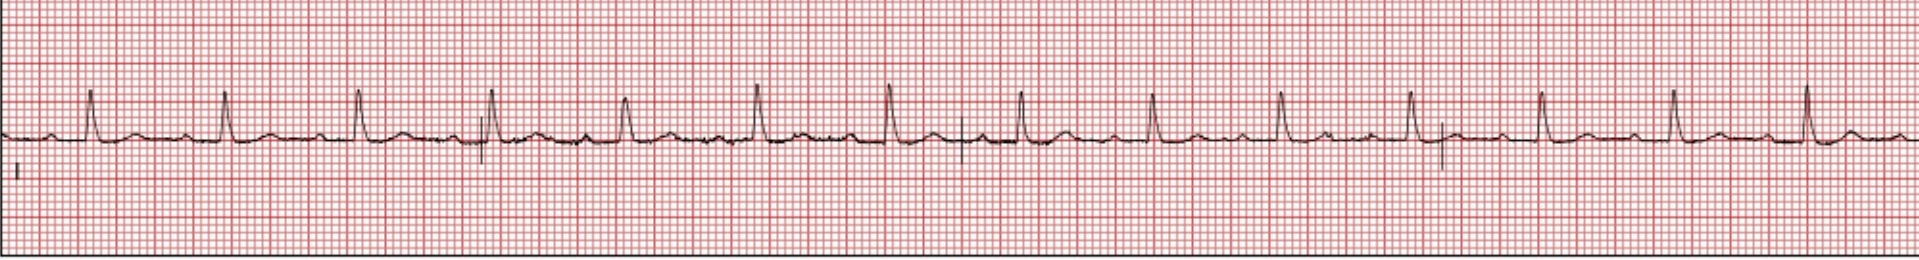



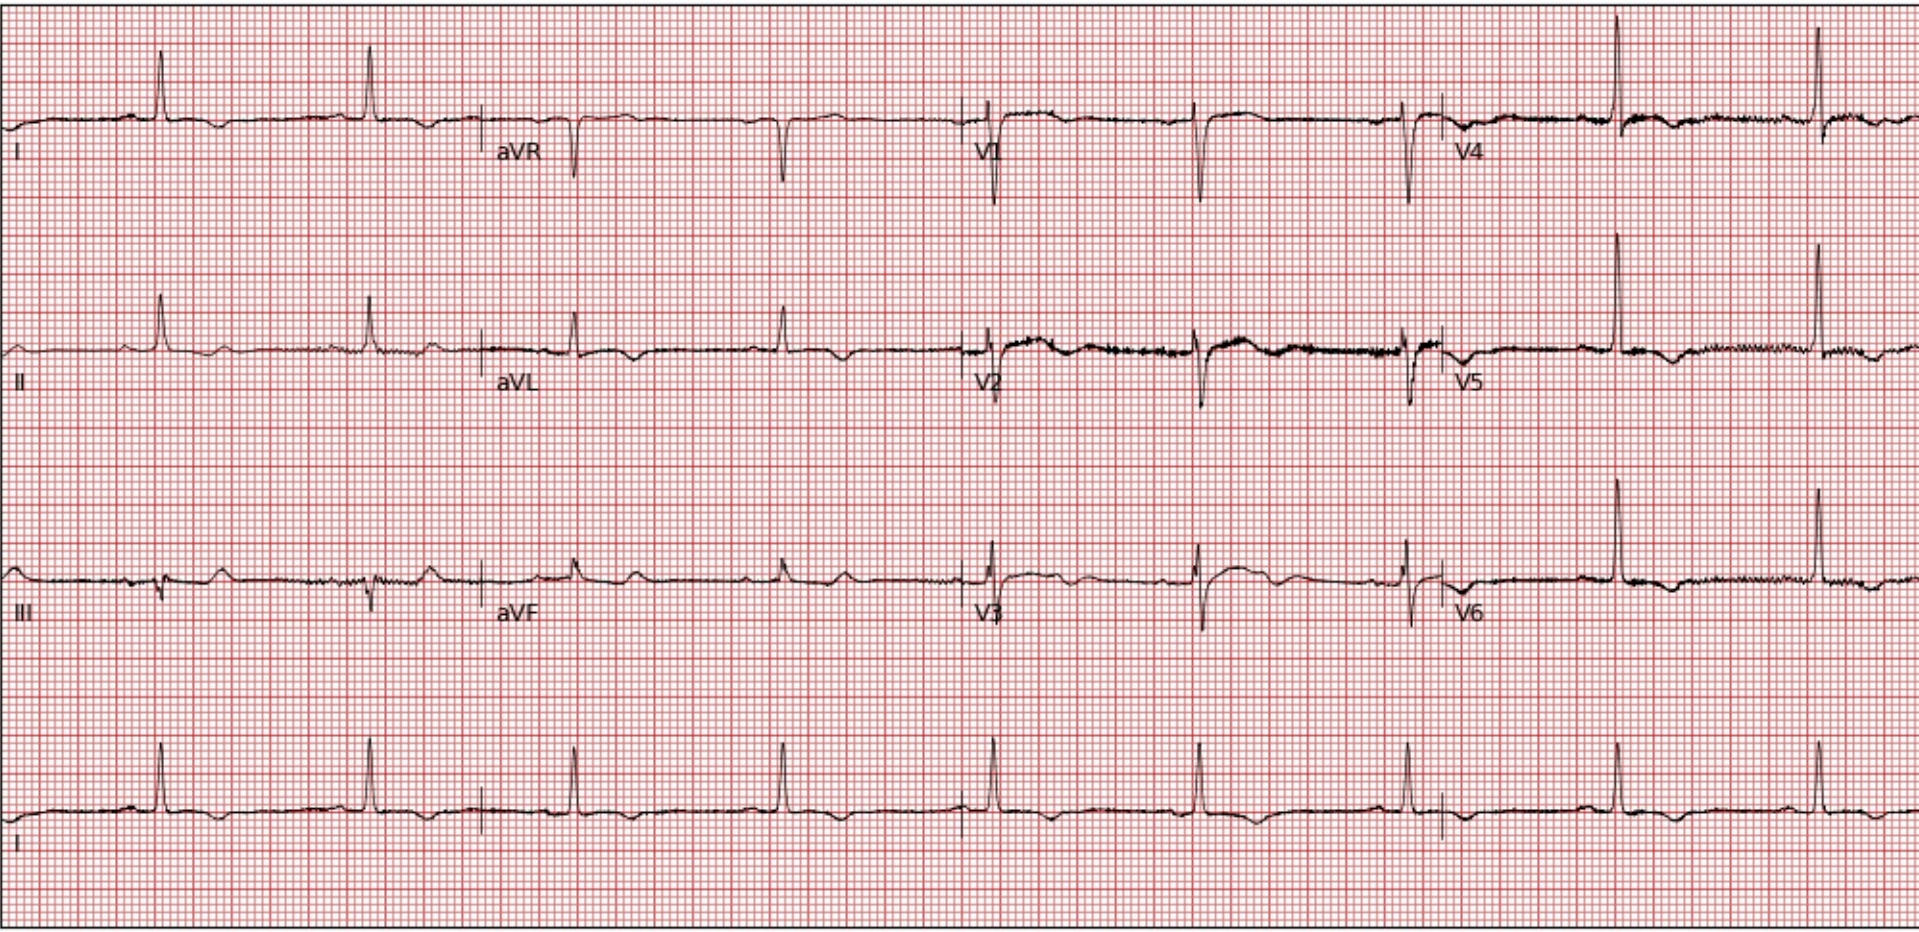



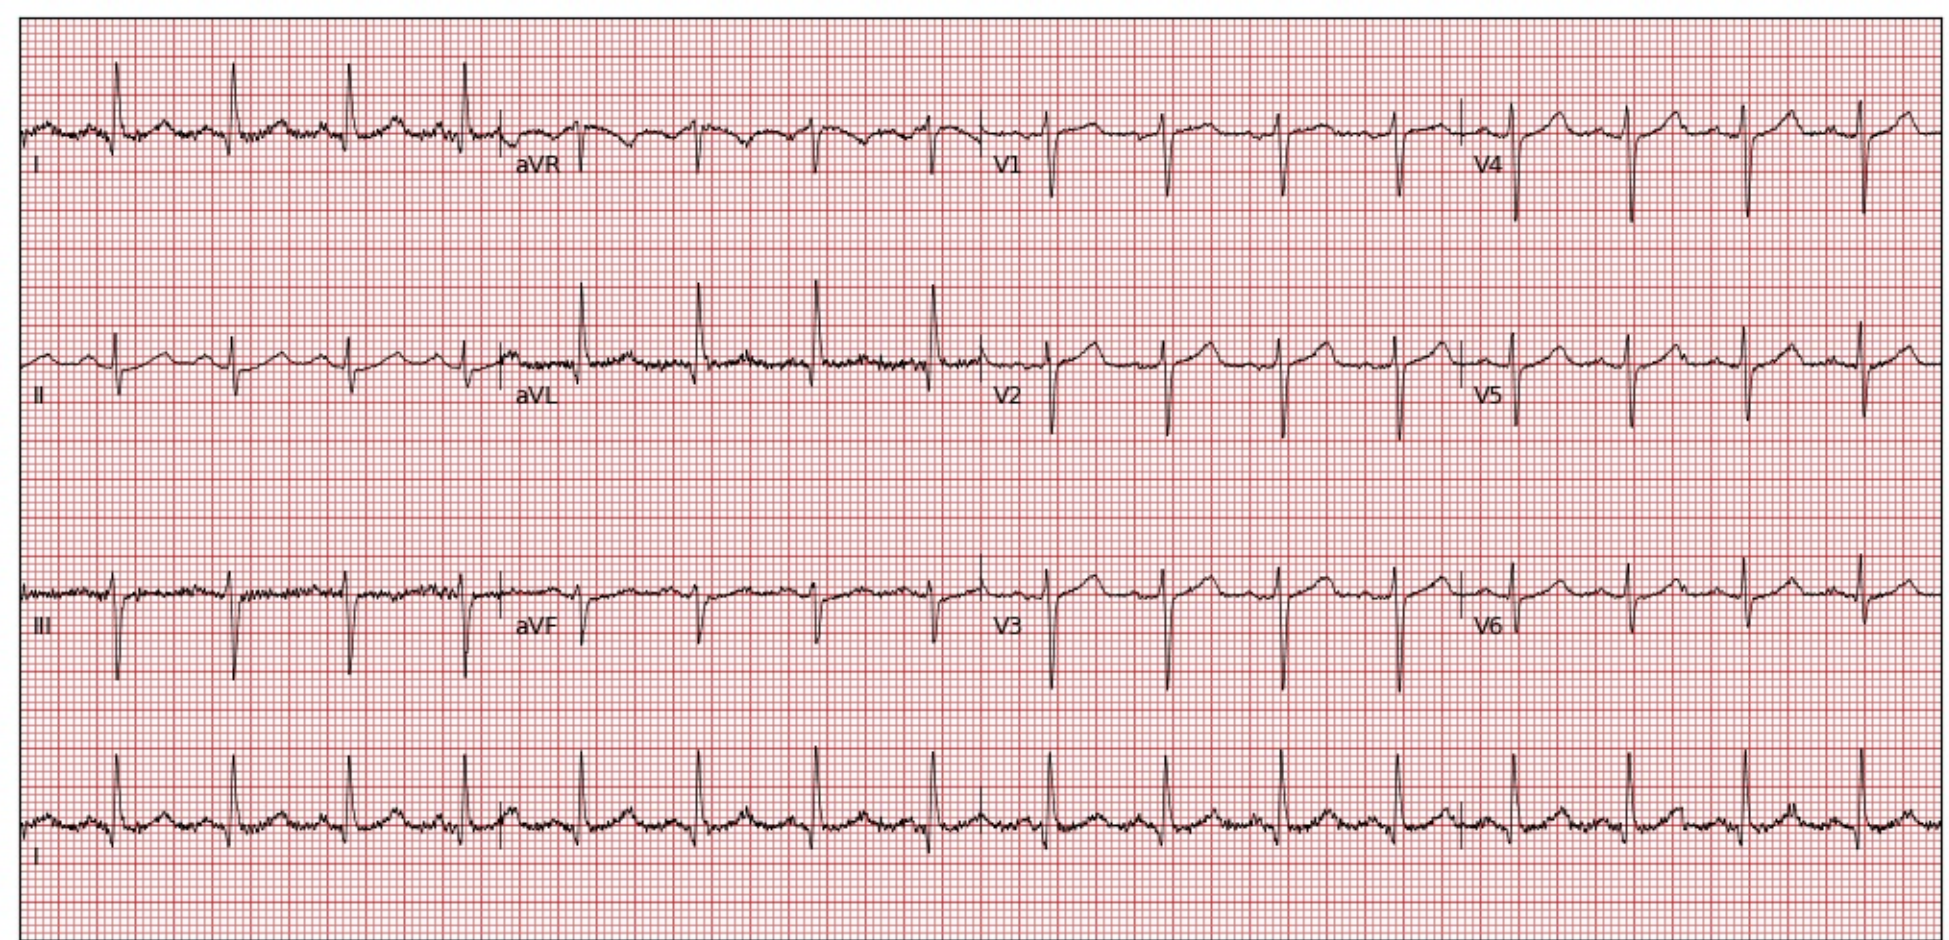



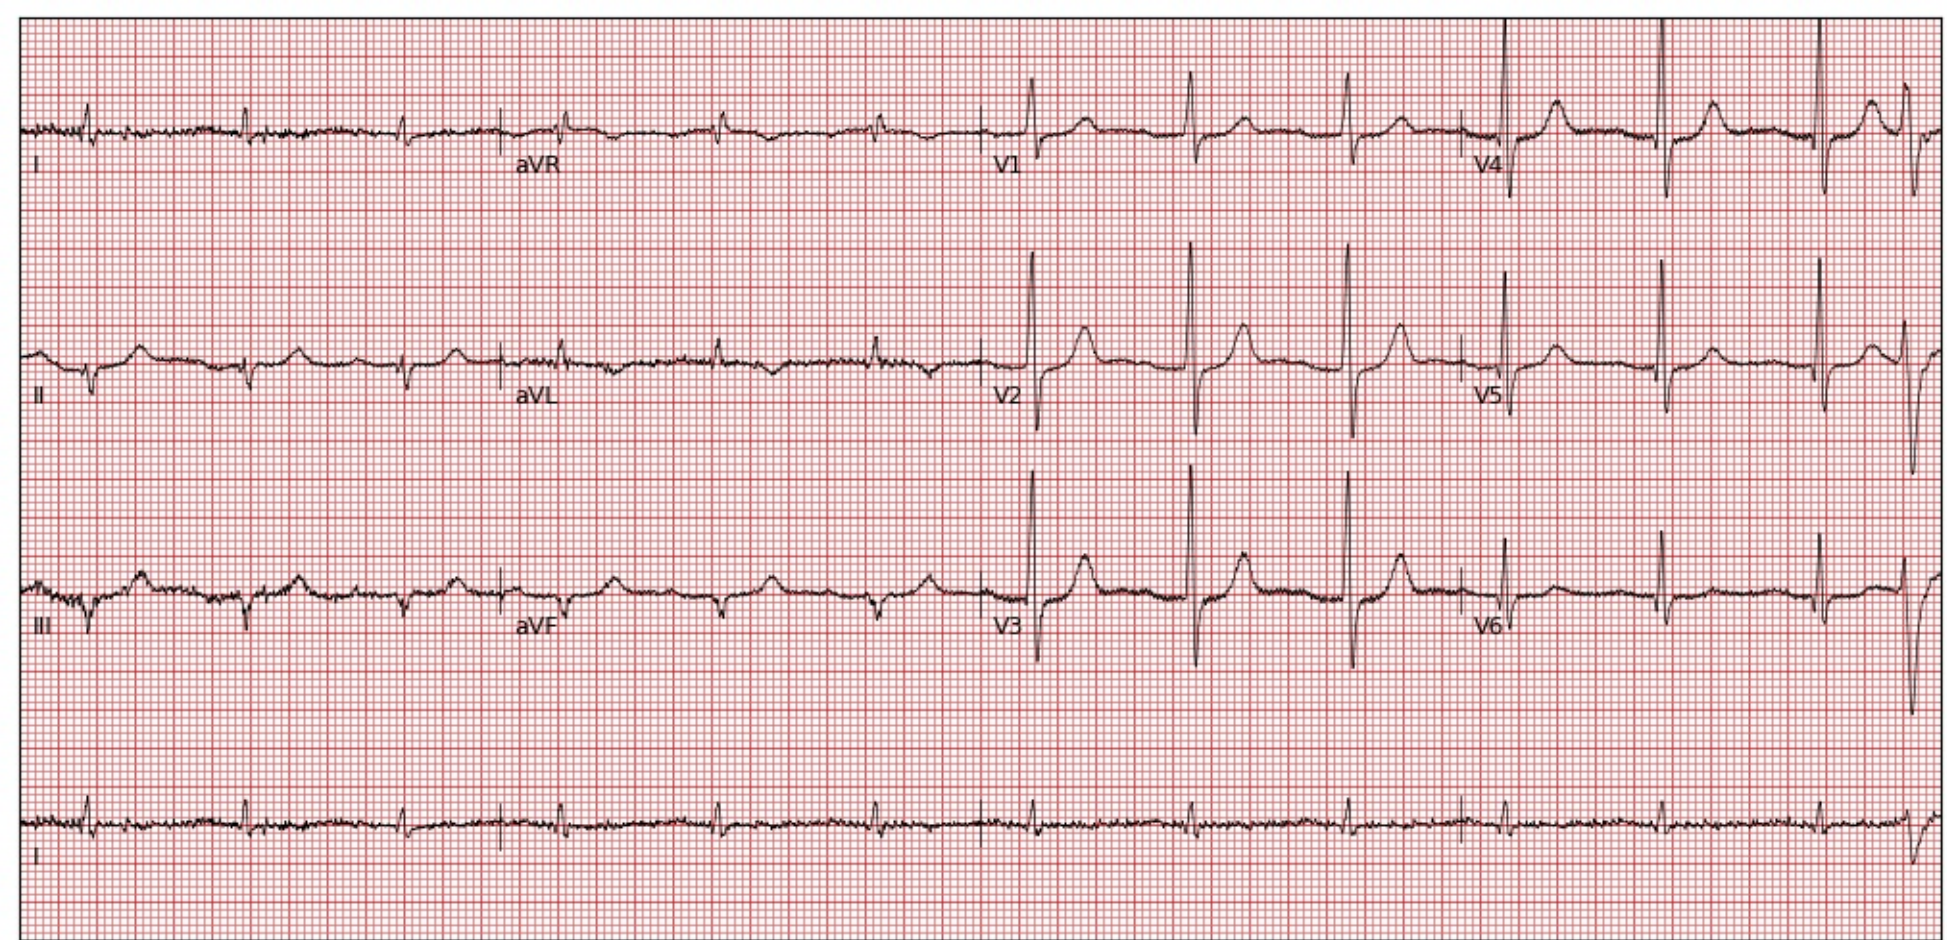



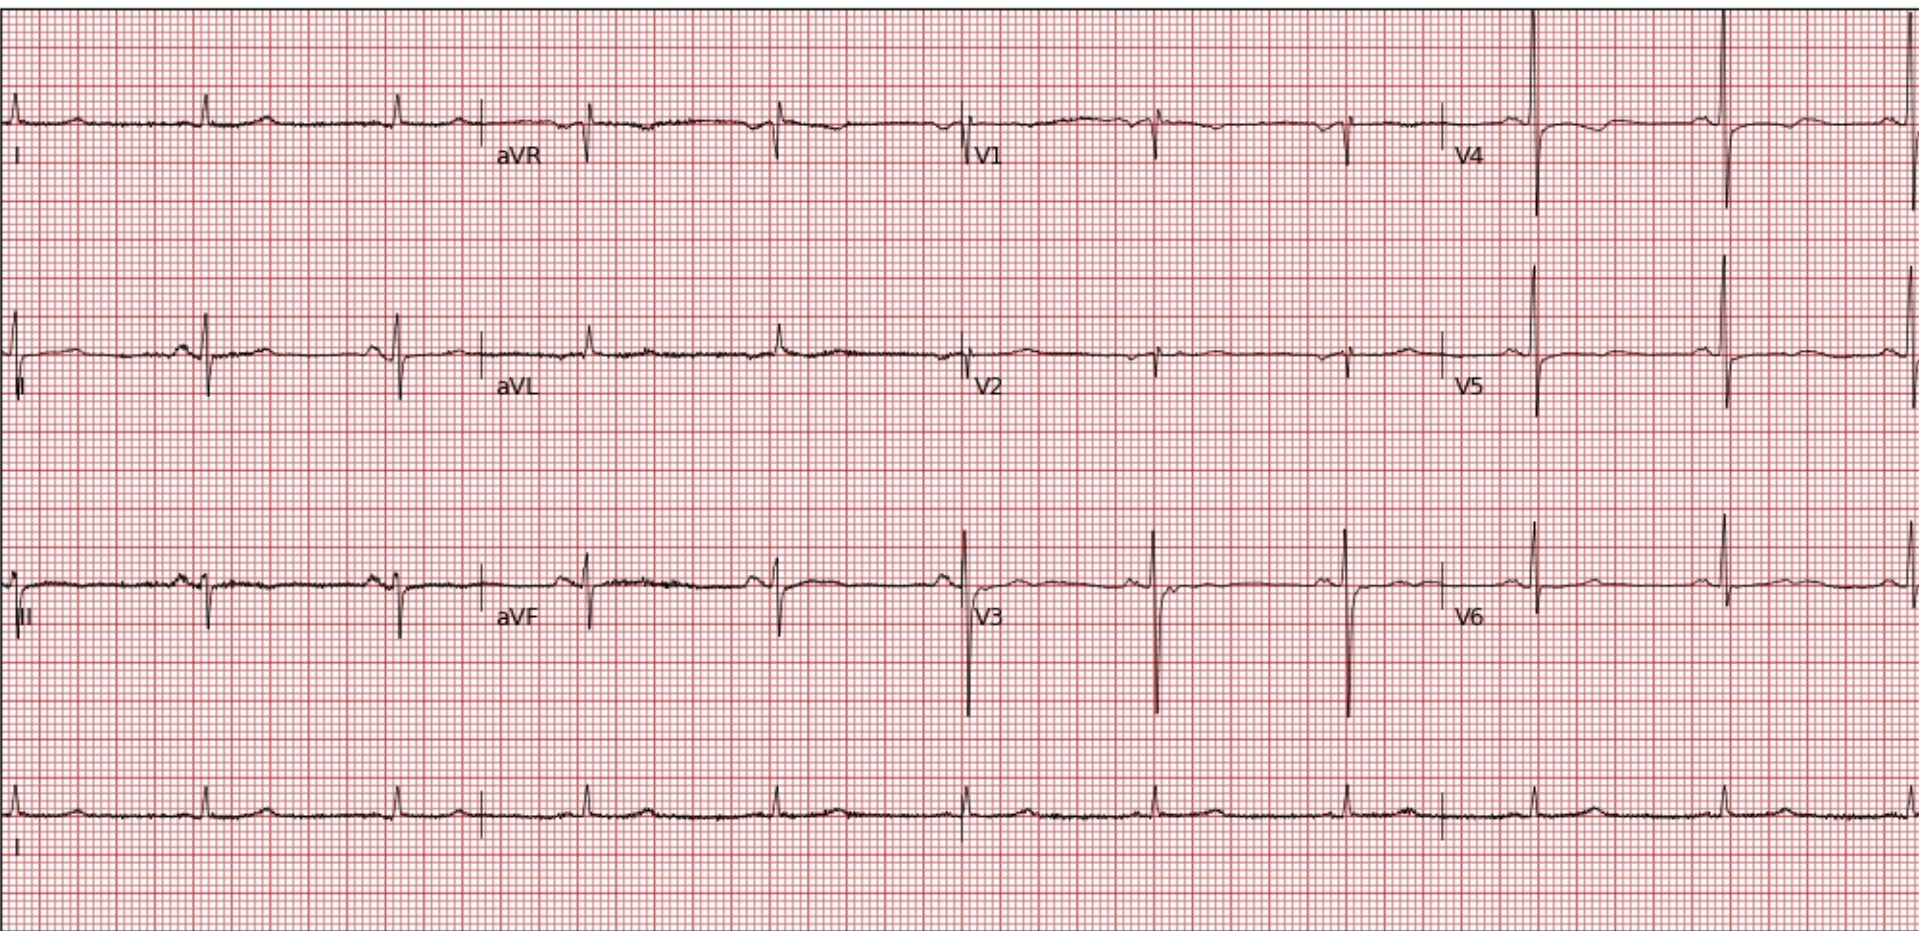



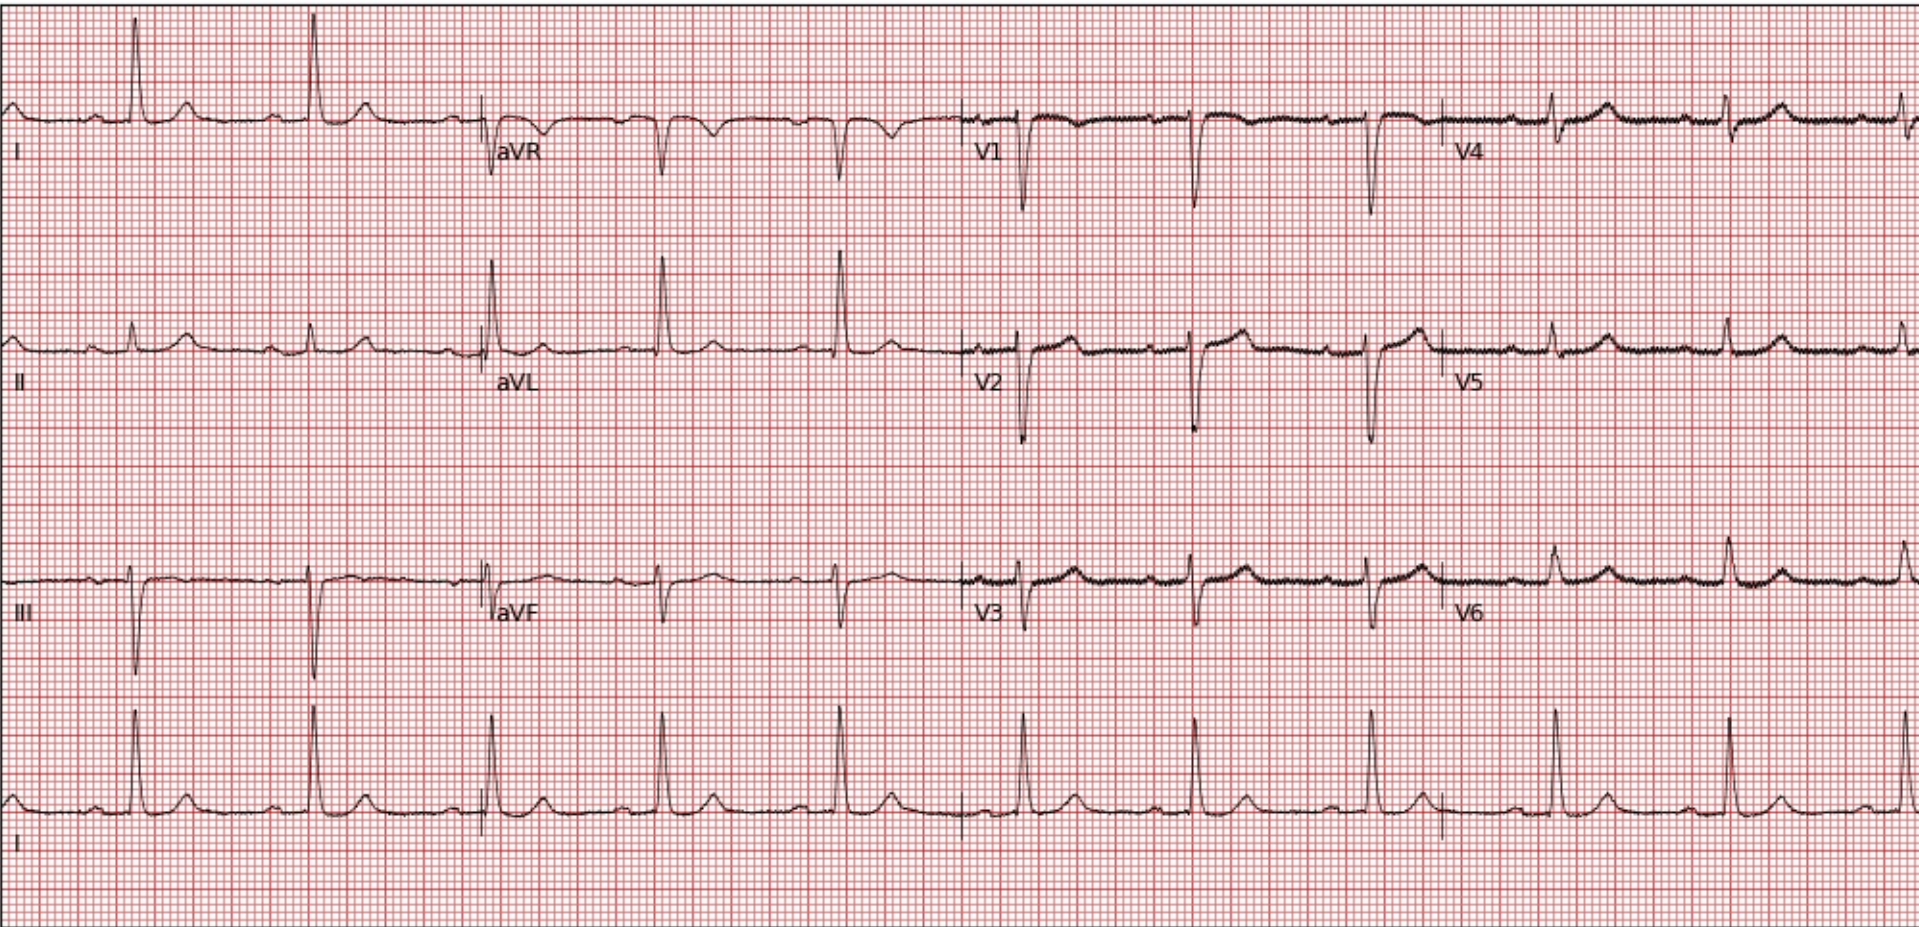



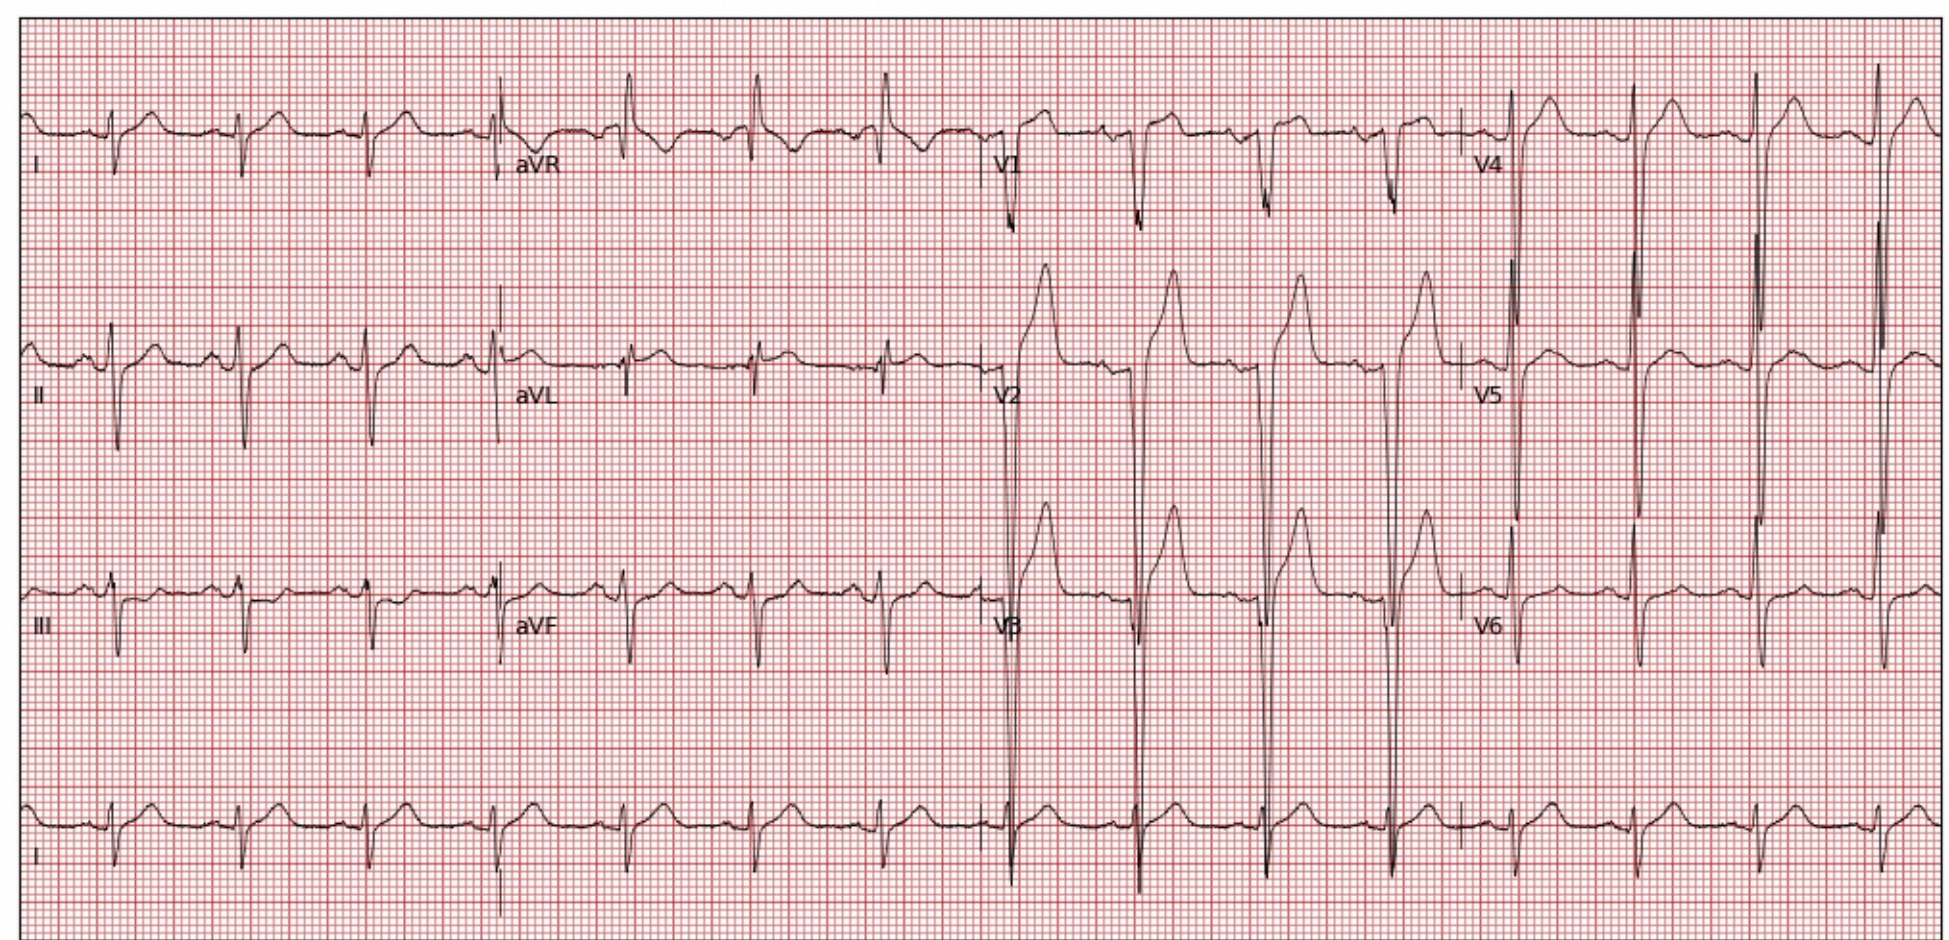



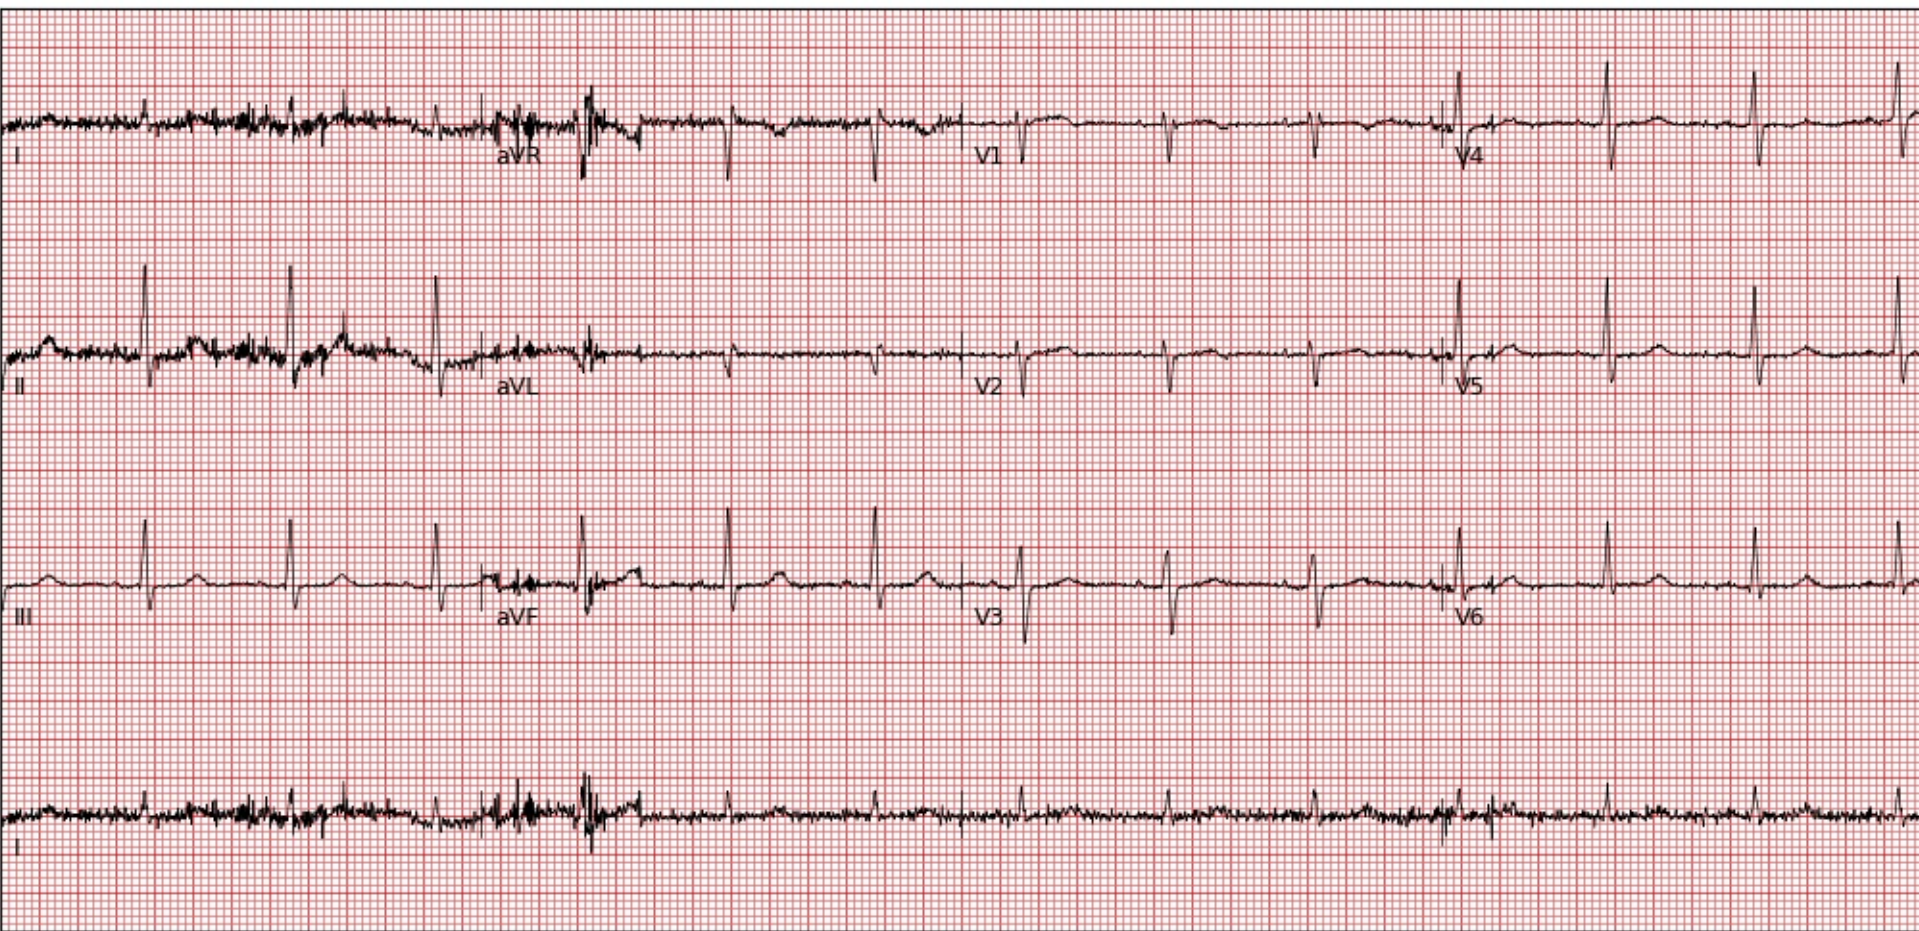



**Section 4. Random examples of 25 electrocardiogram images plotted in novel format (Blue-on-Black Standard) not encountered during model development**

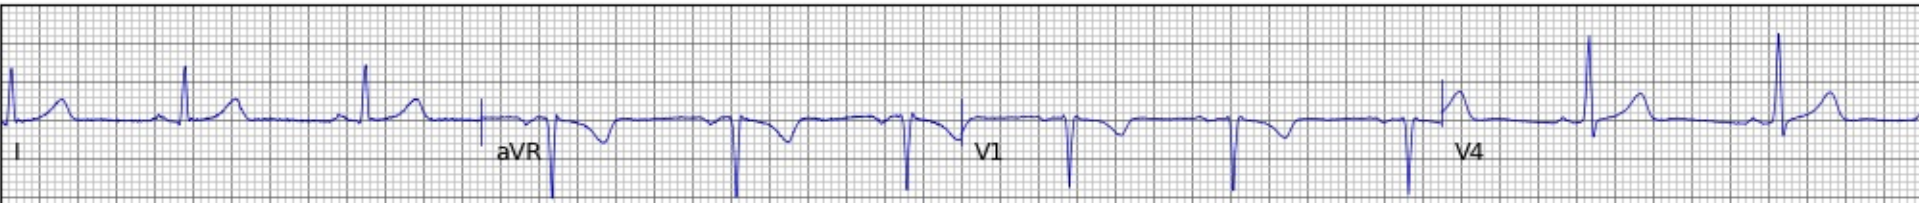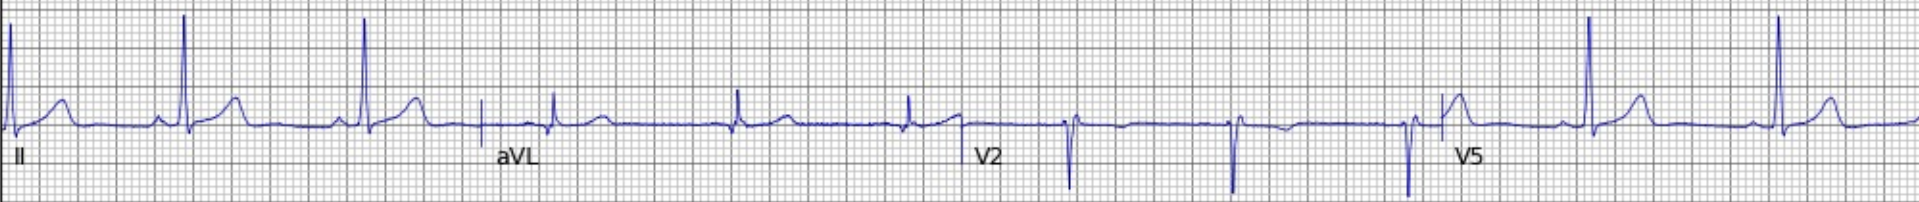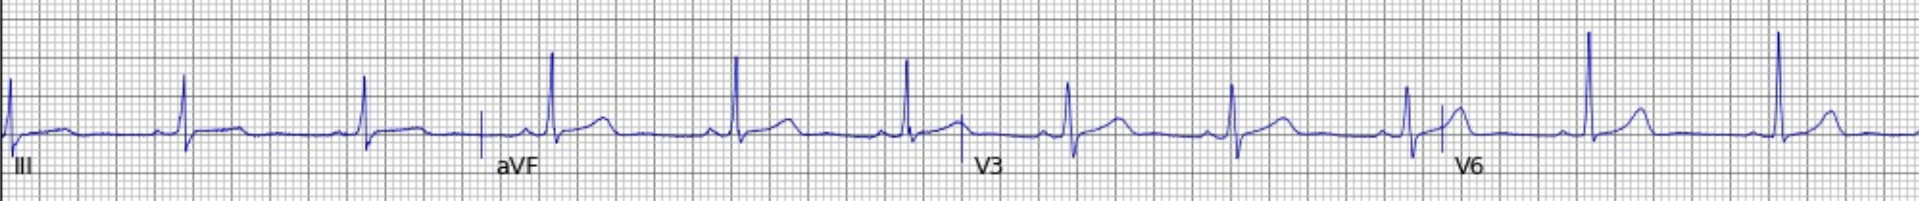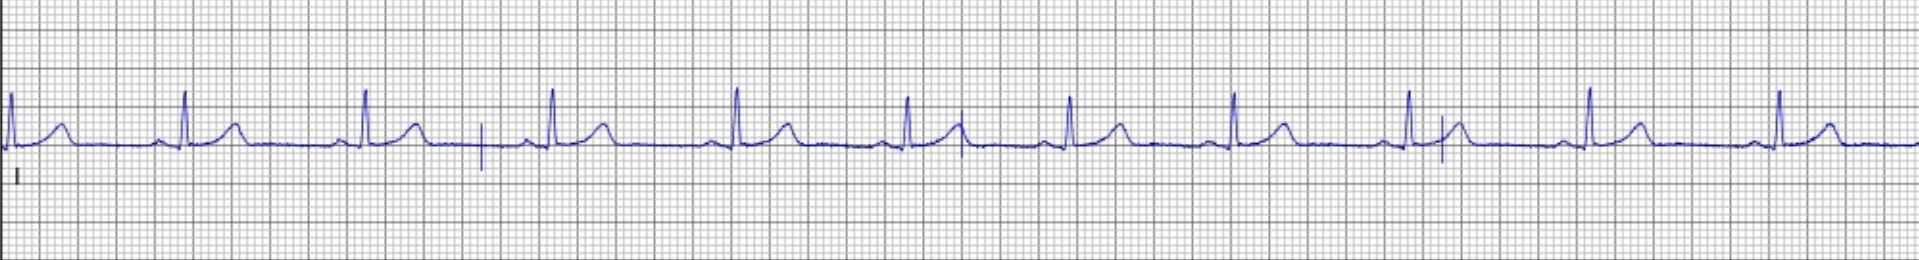

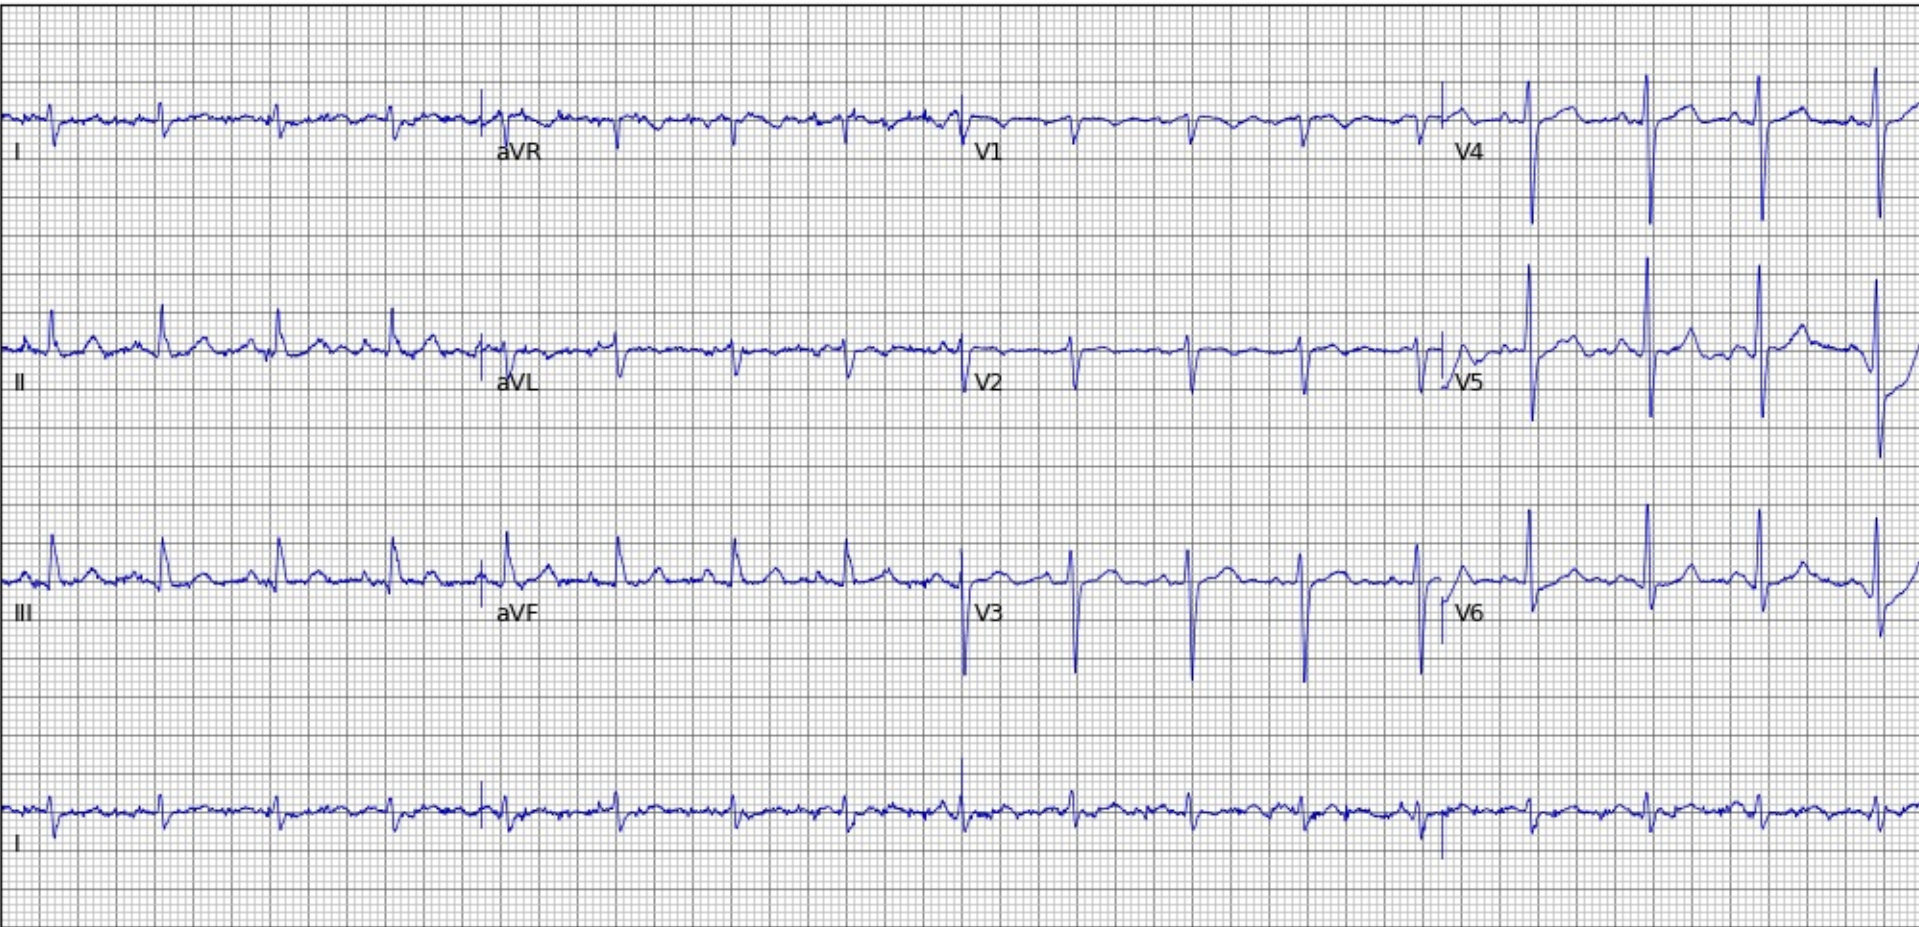



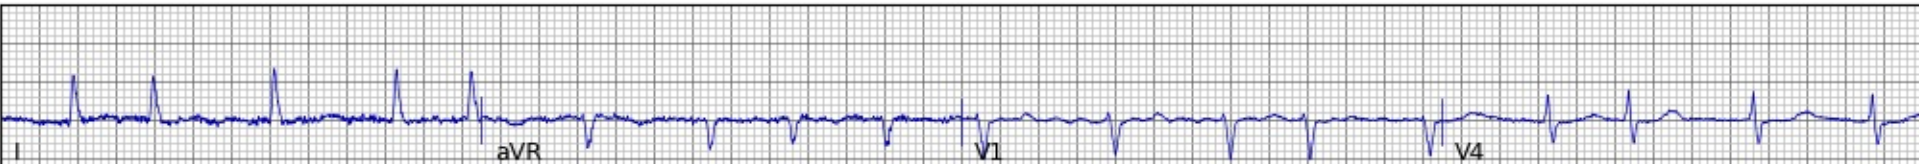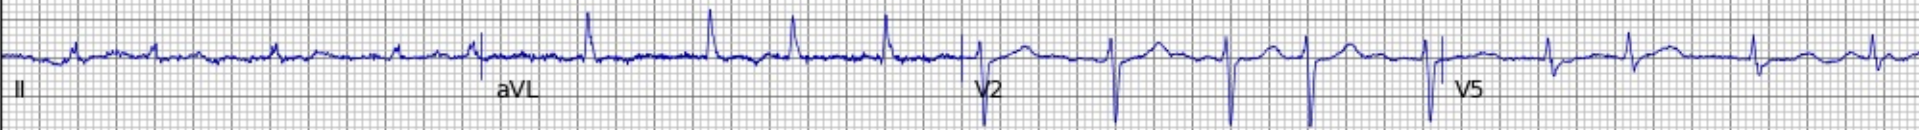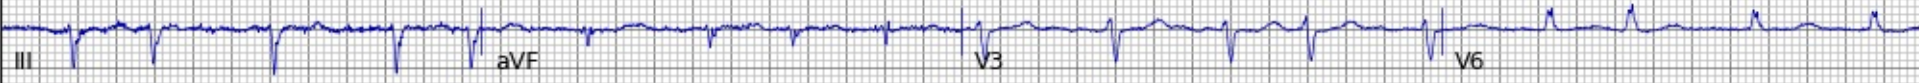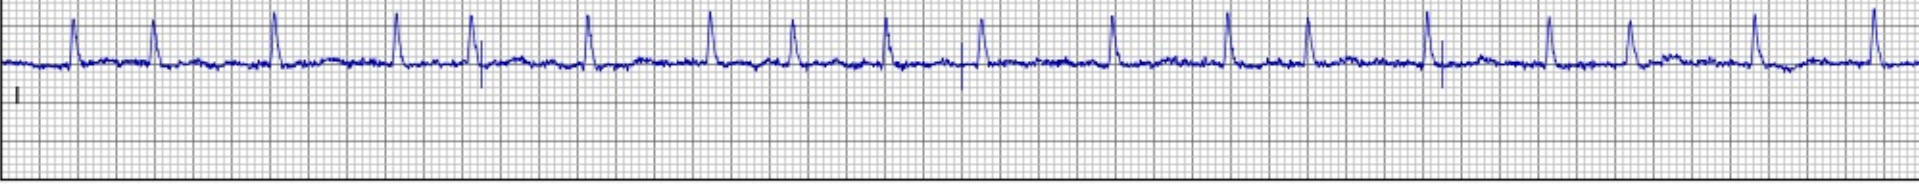

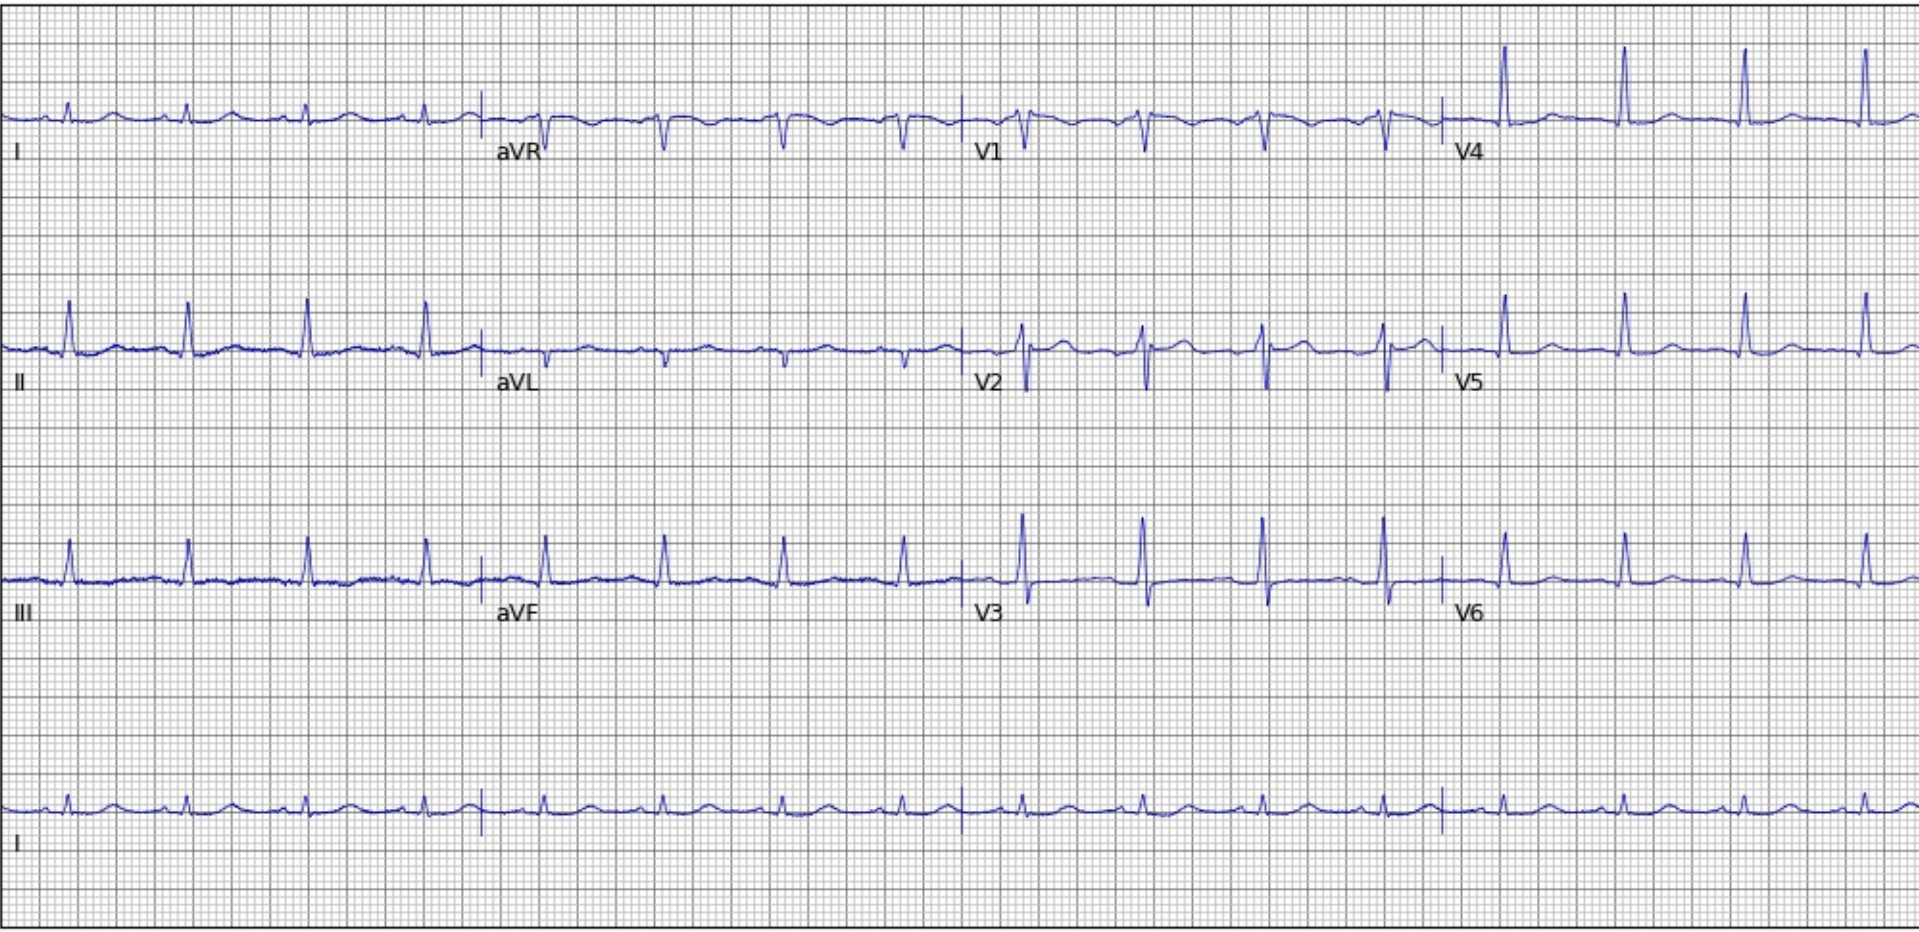



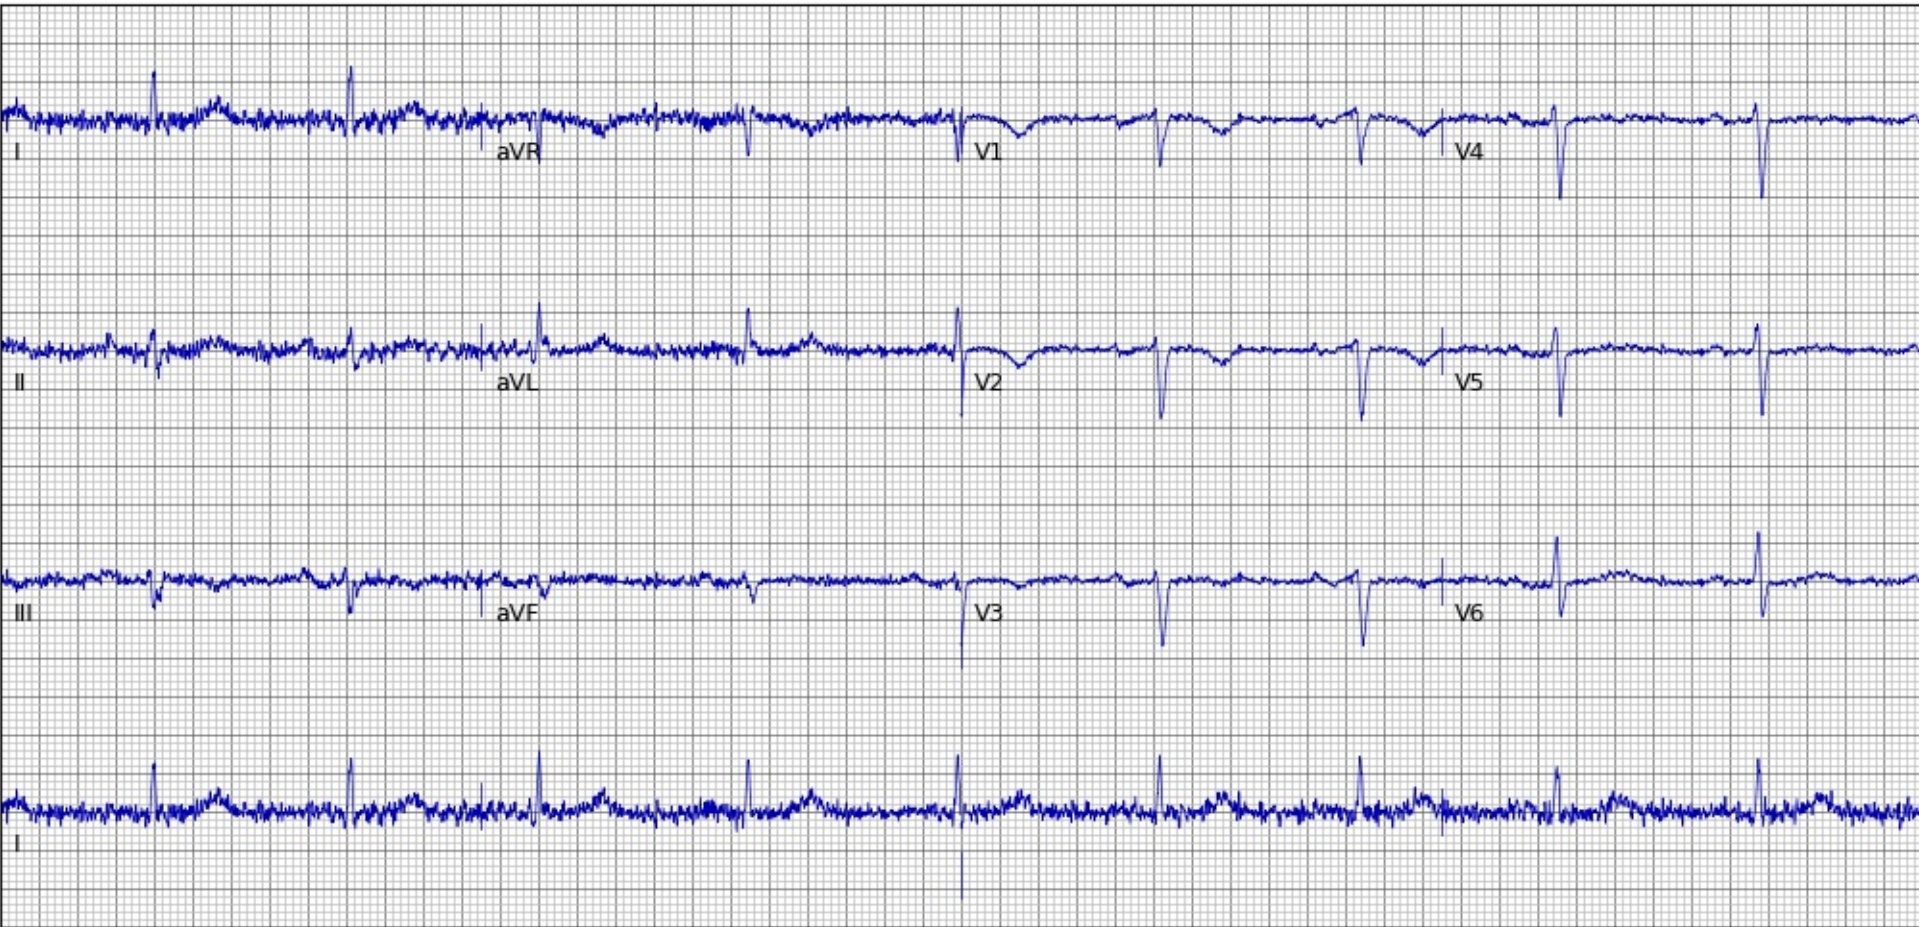



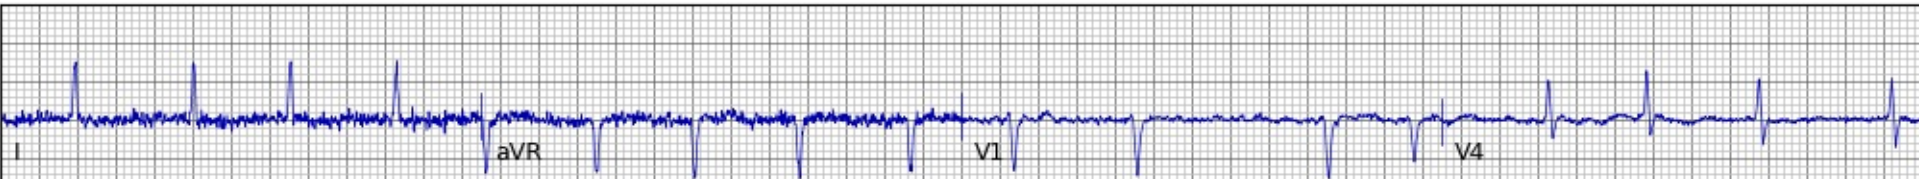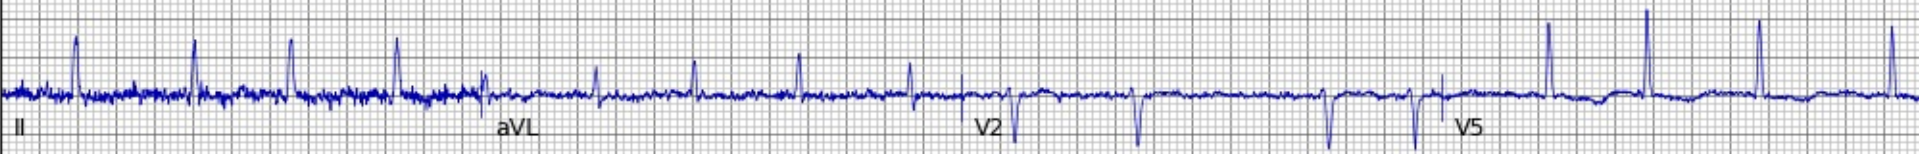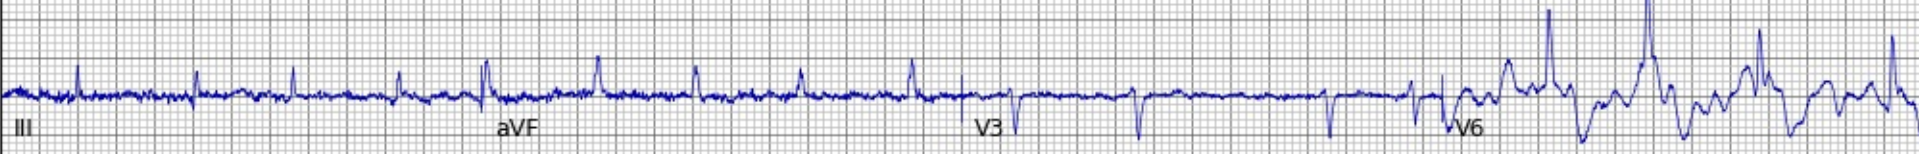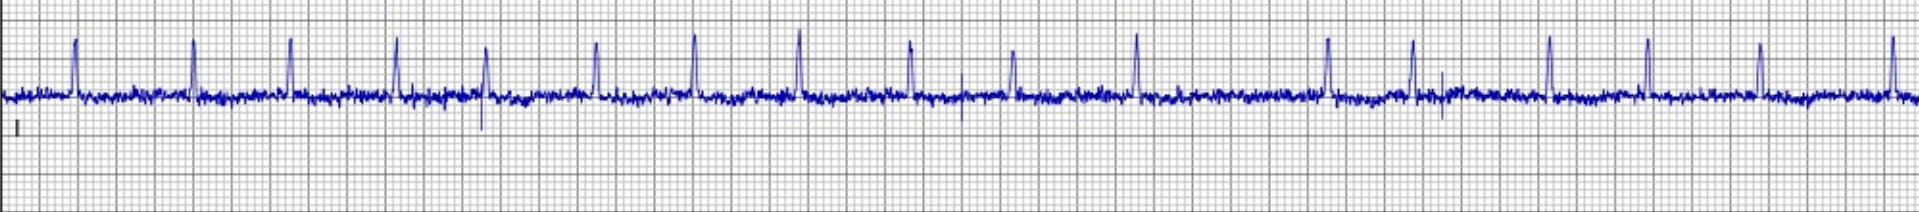

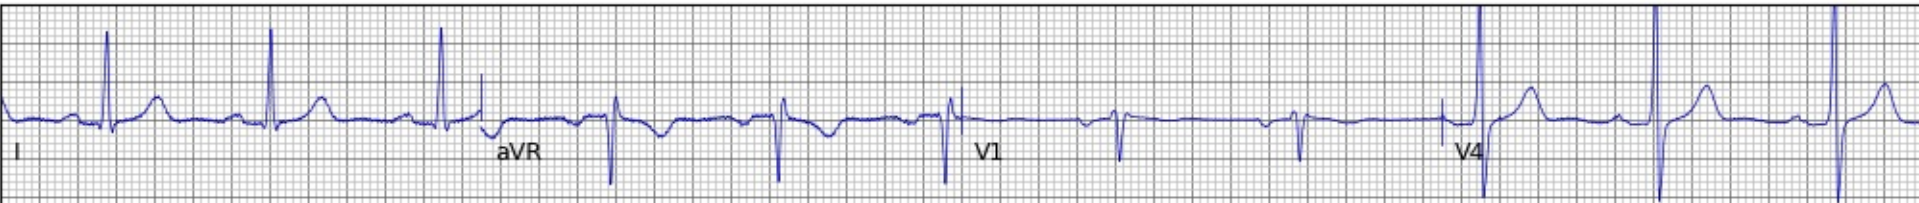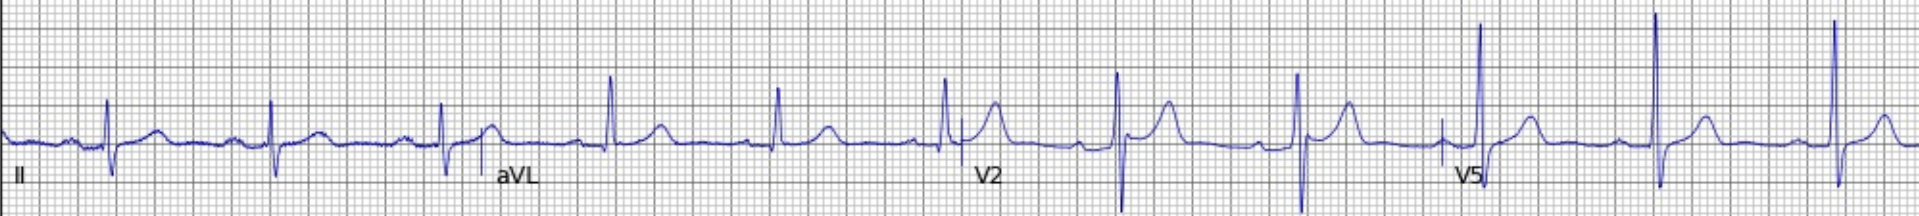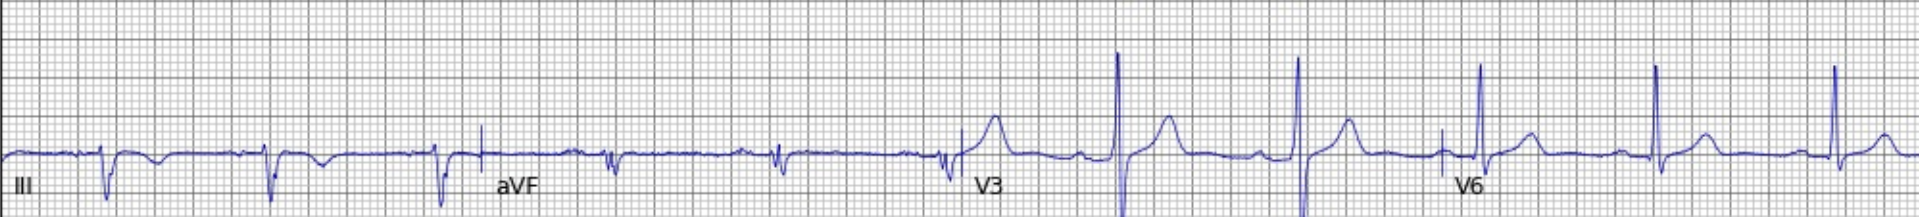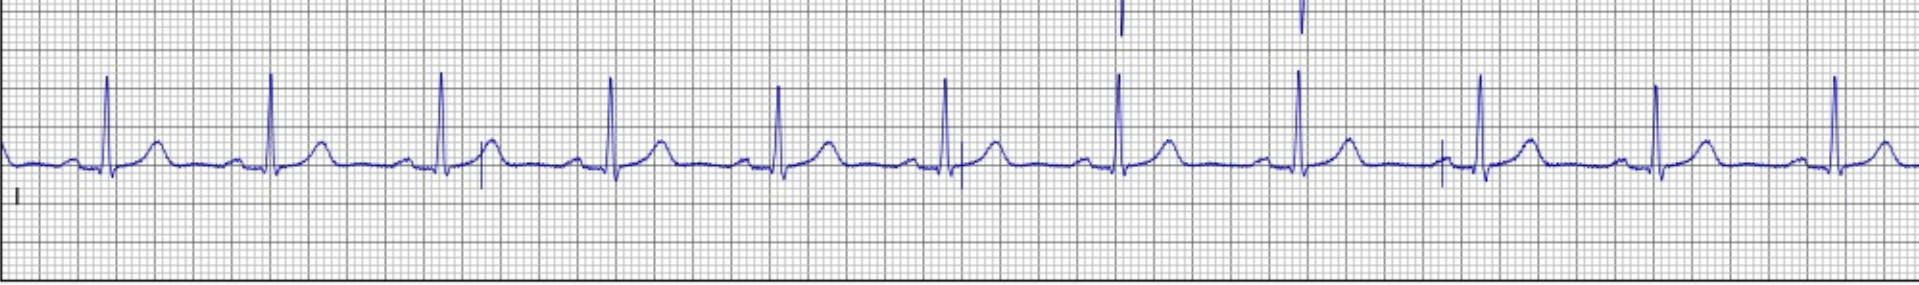



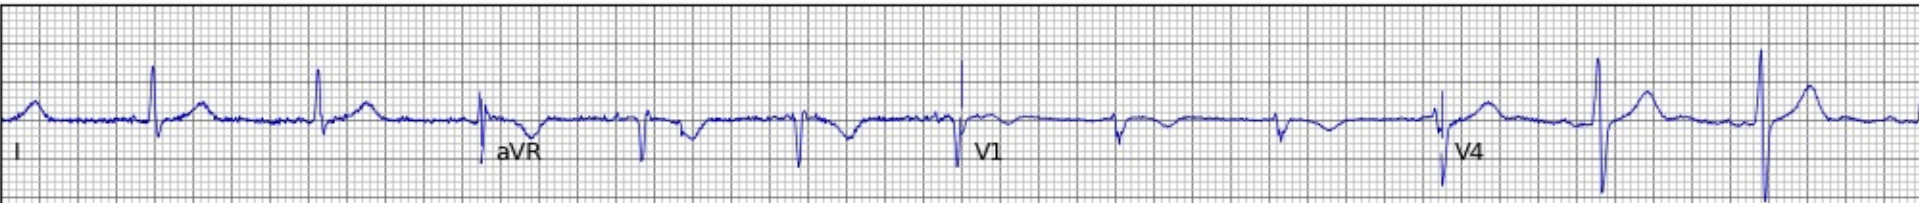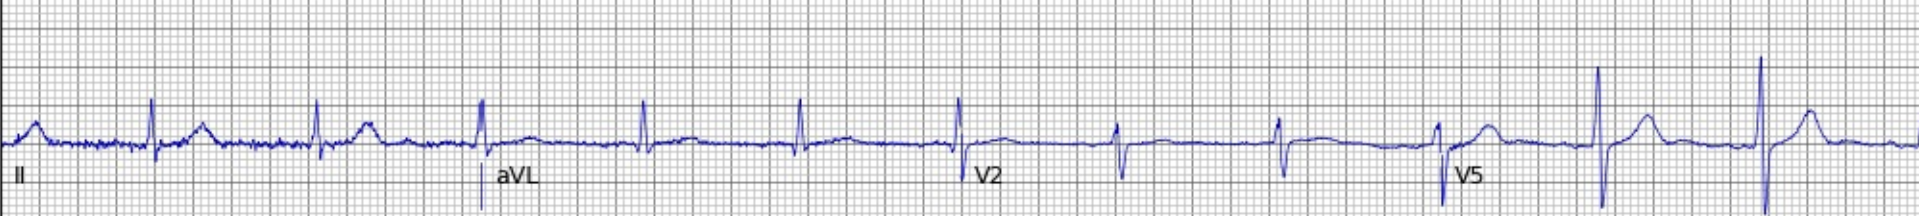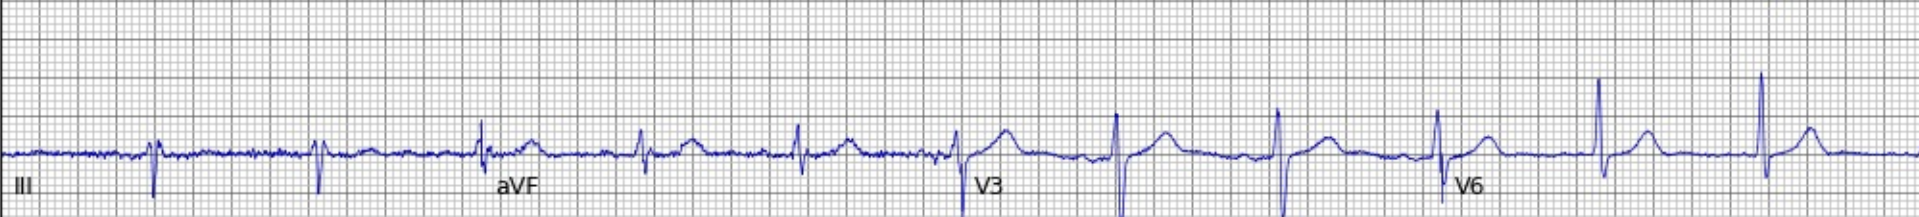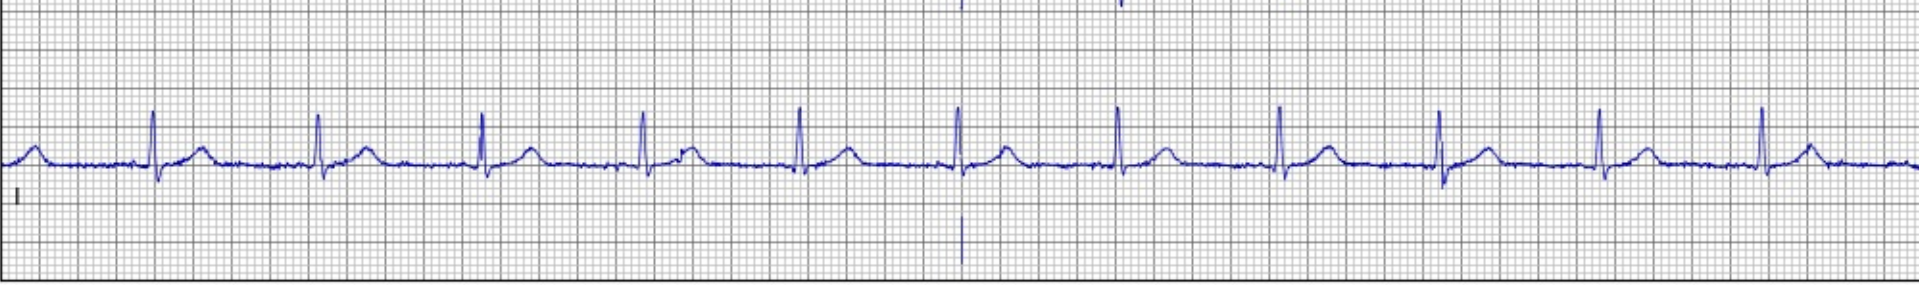



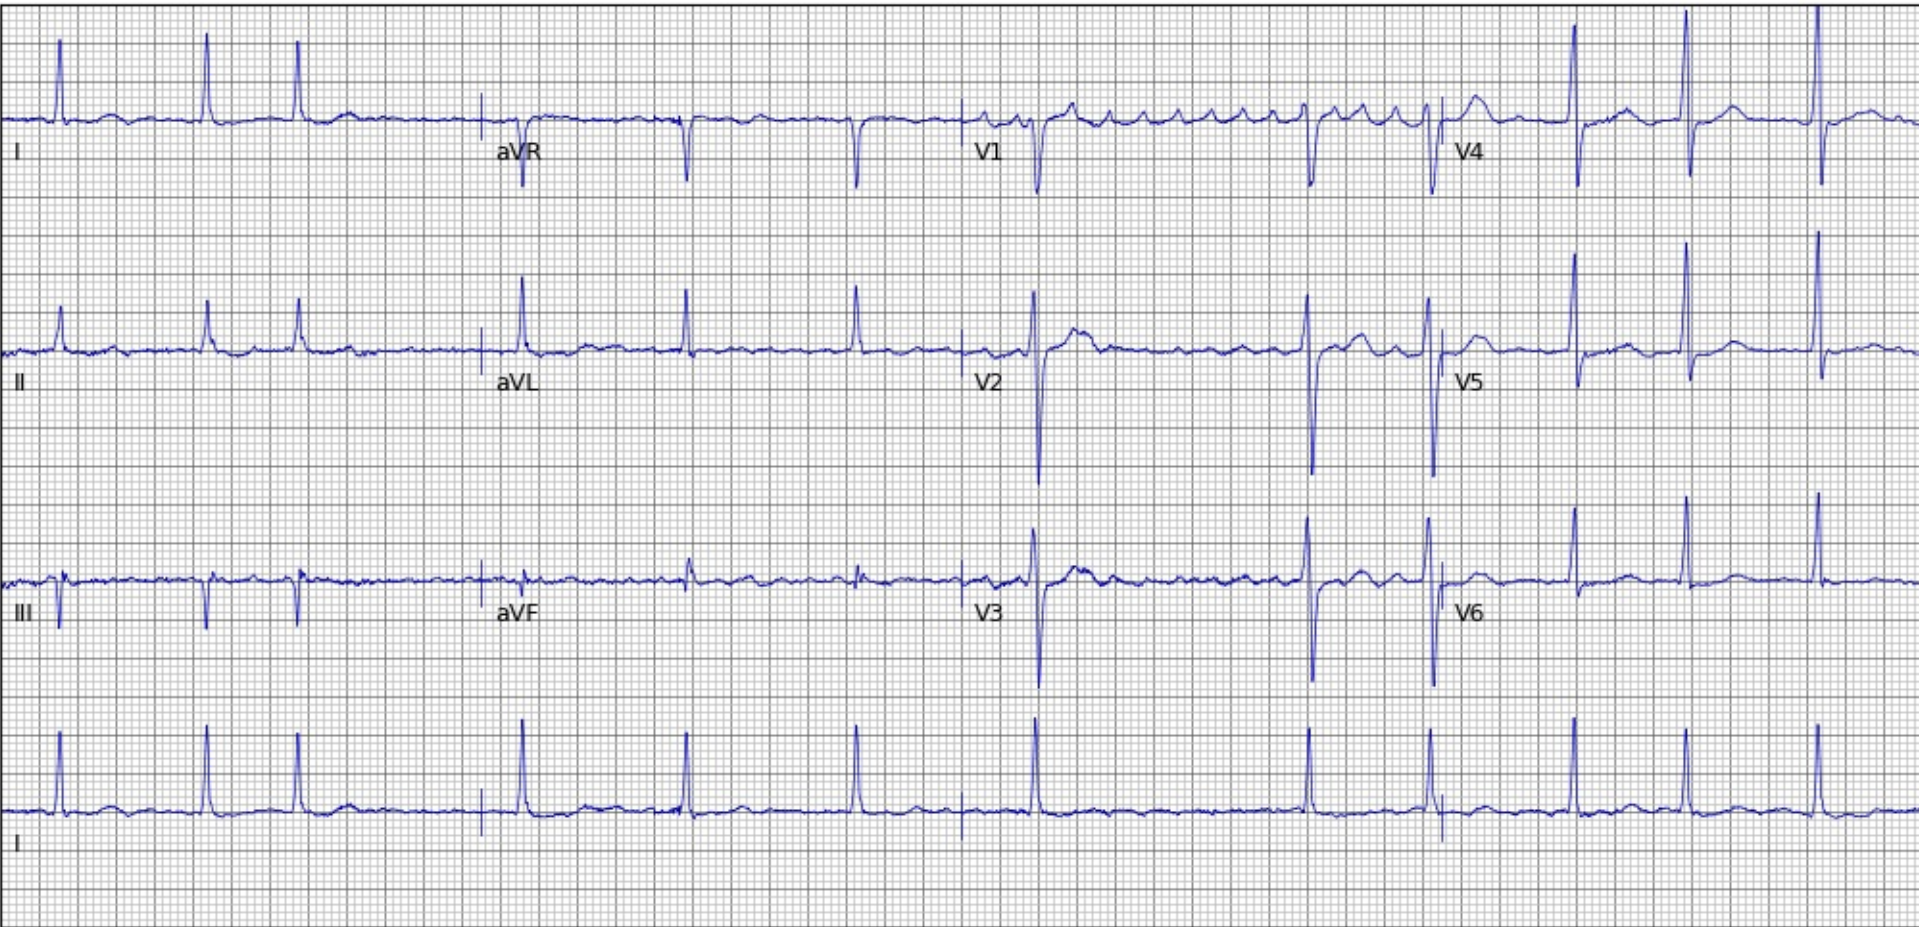

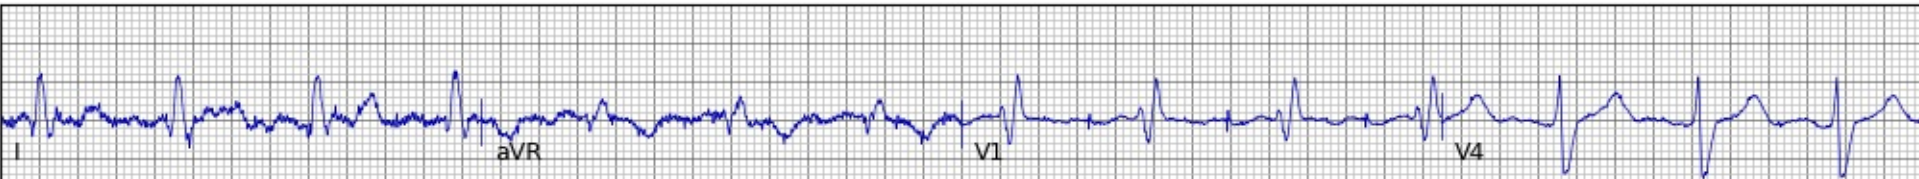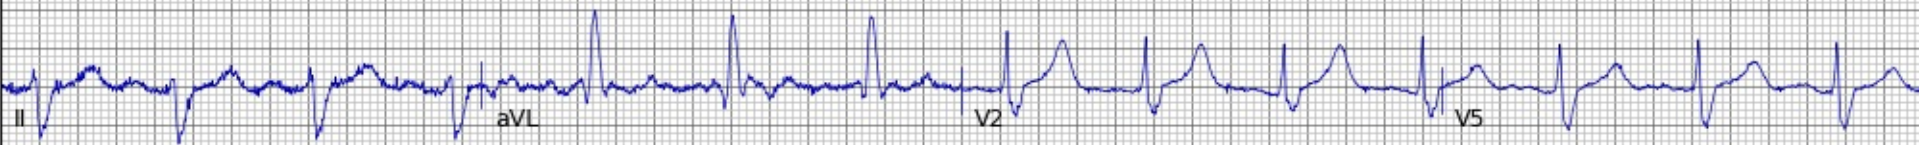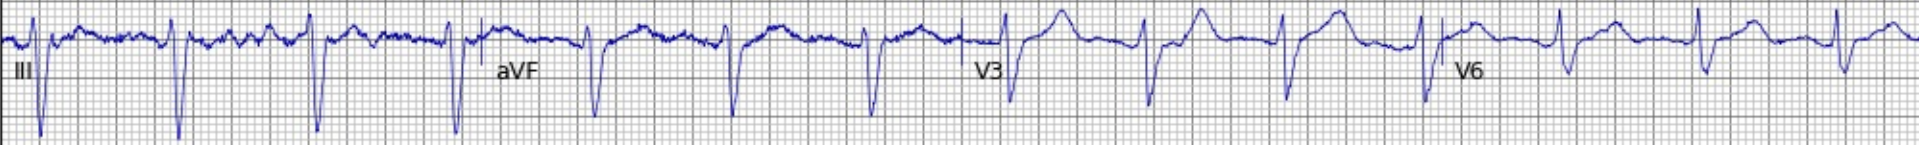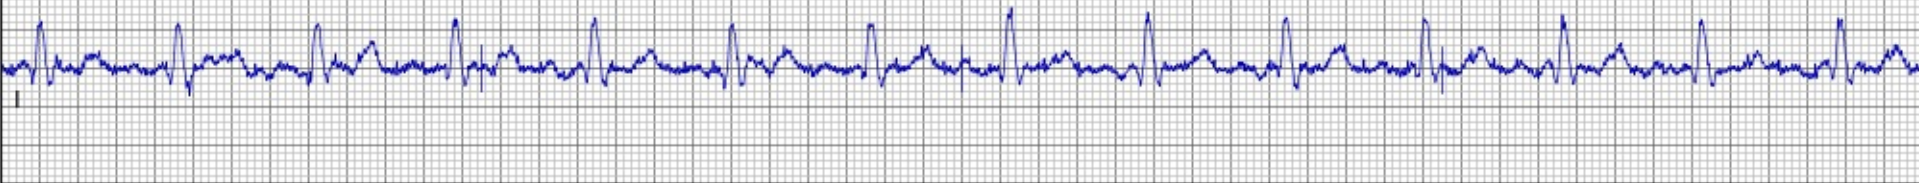



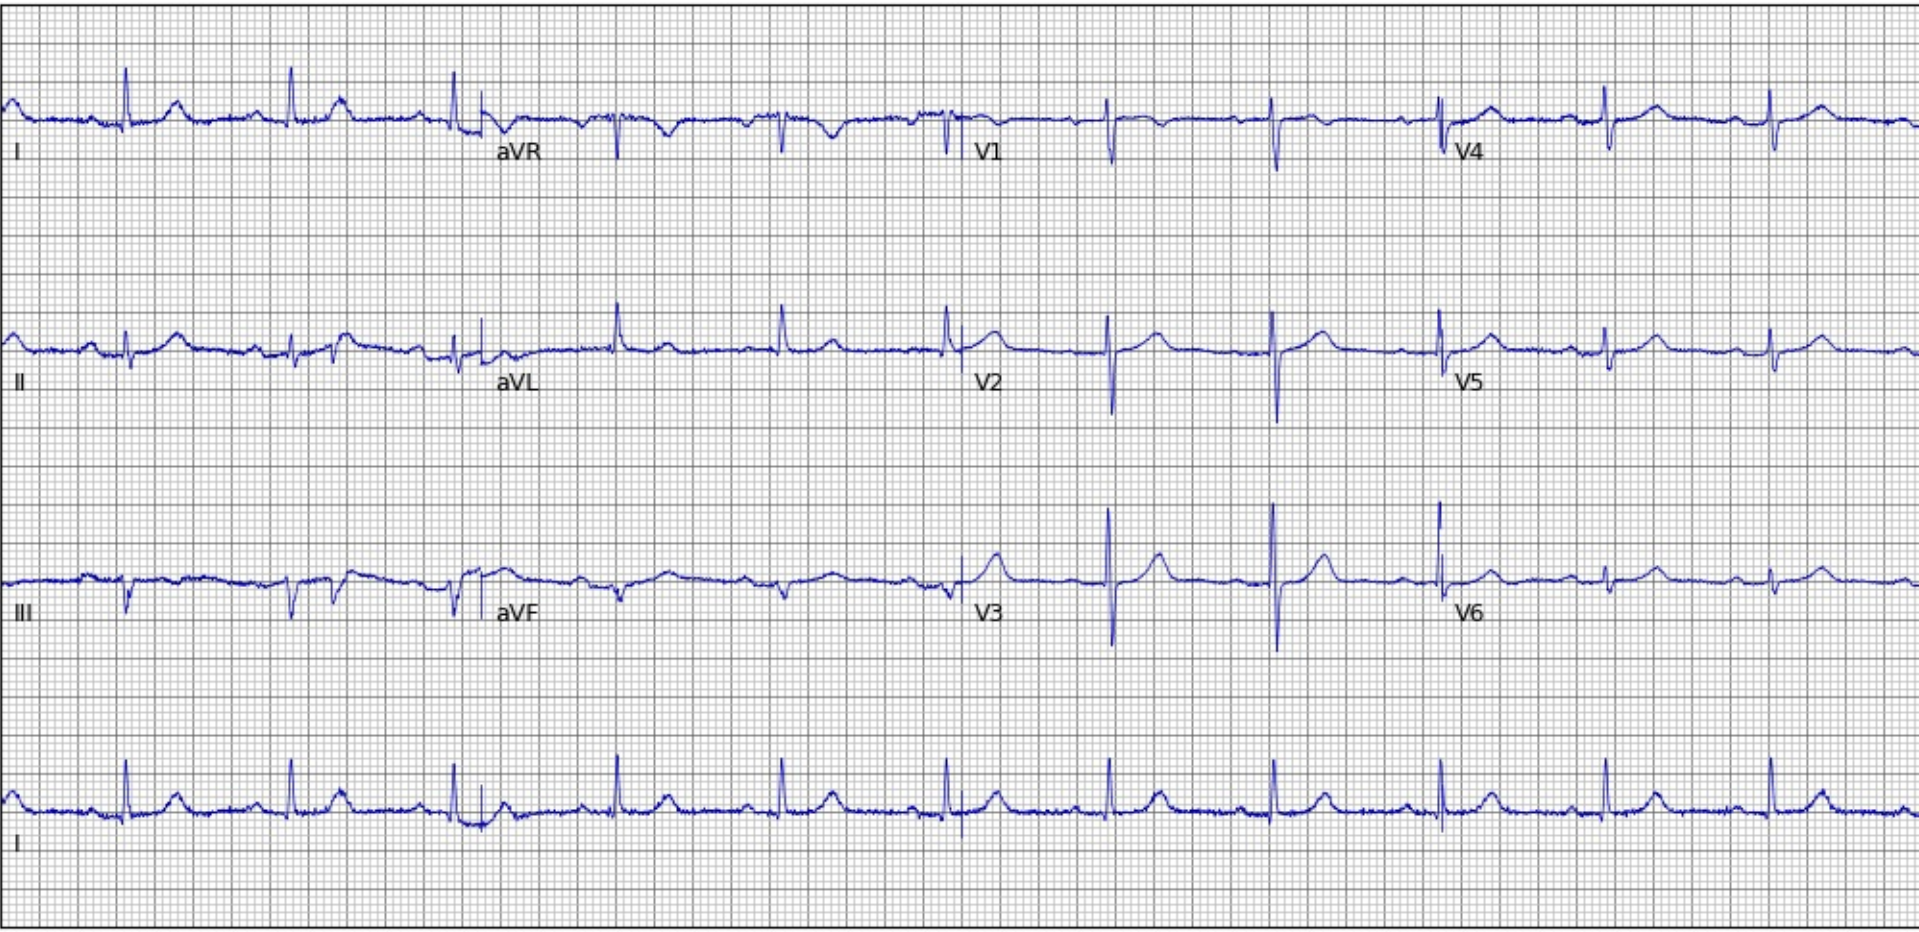



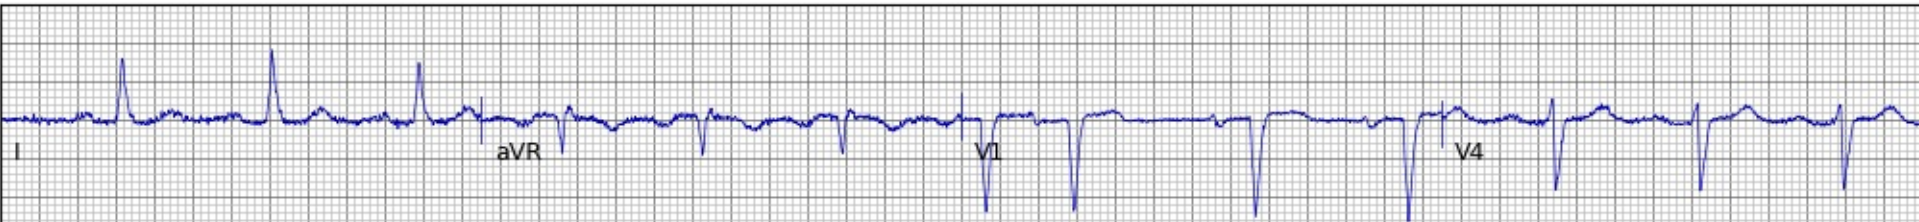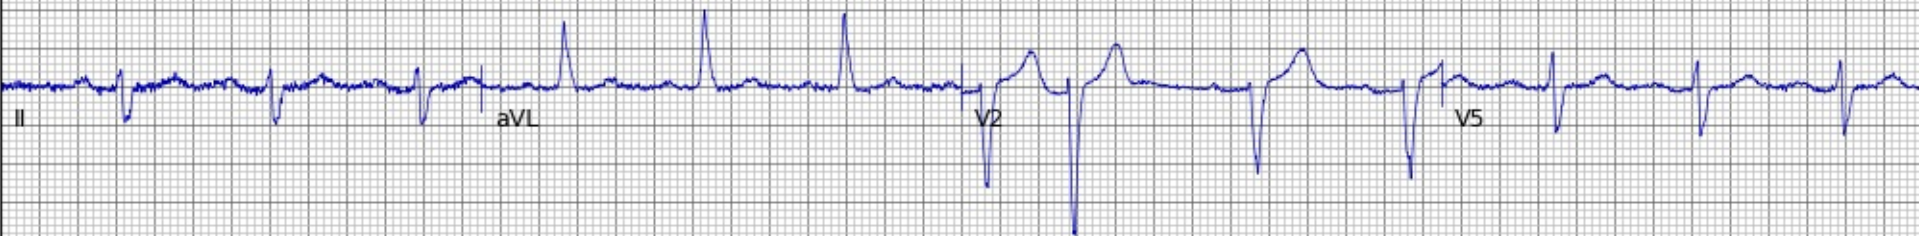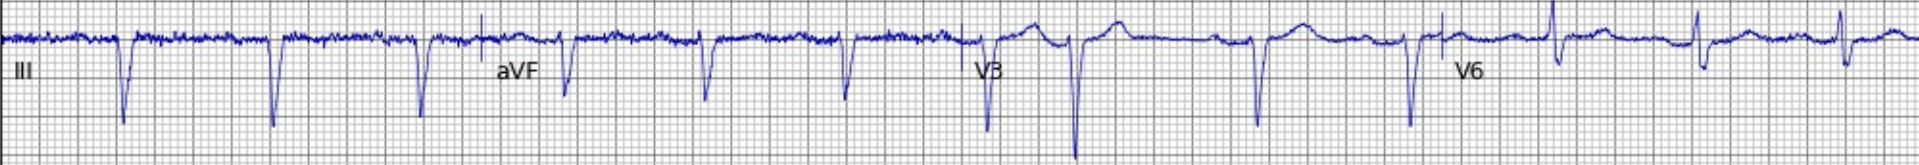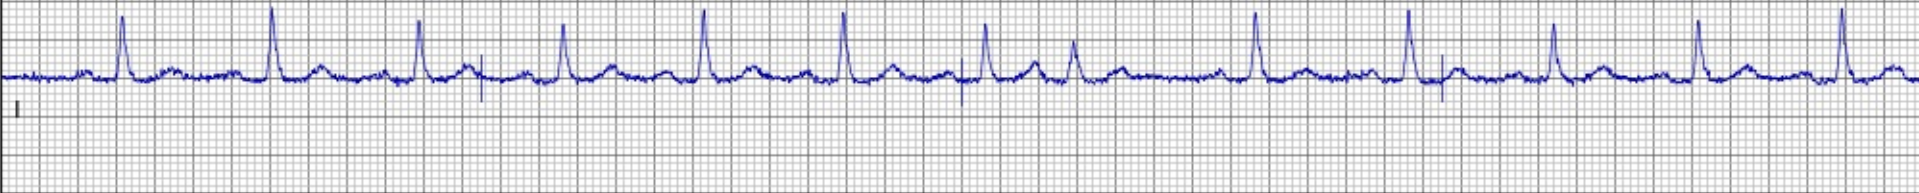

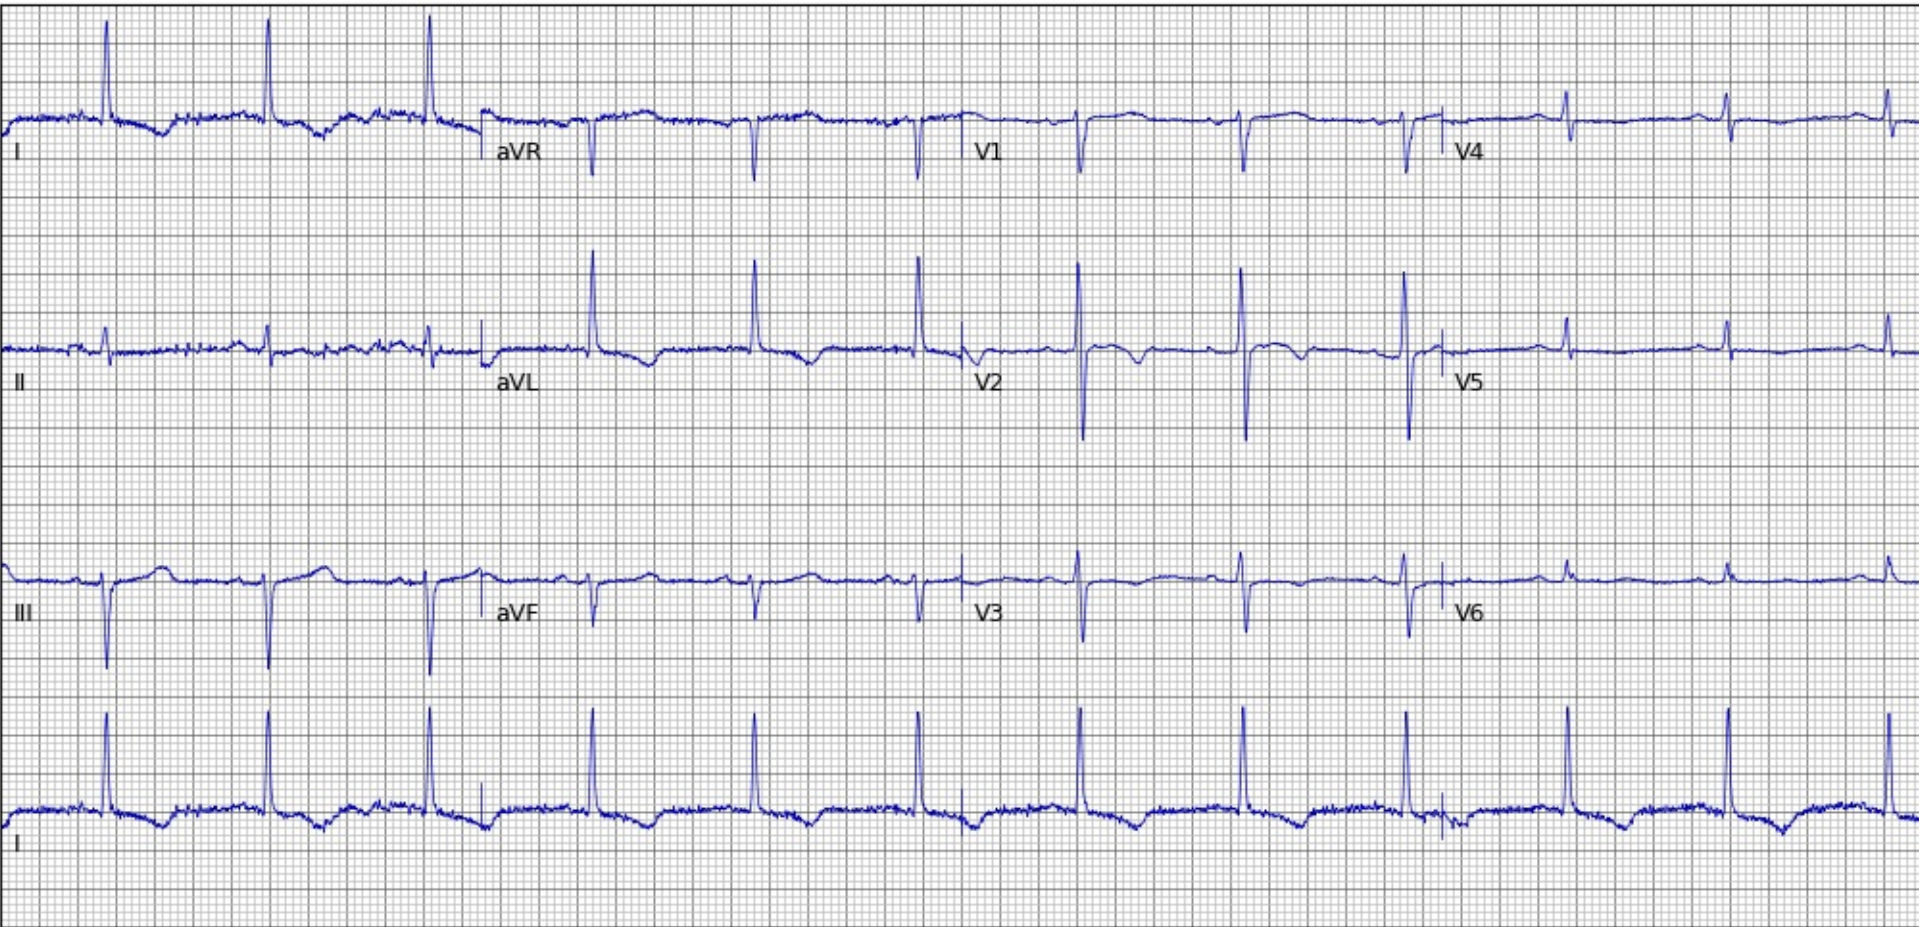



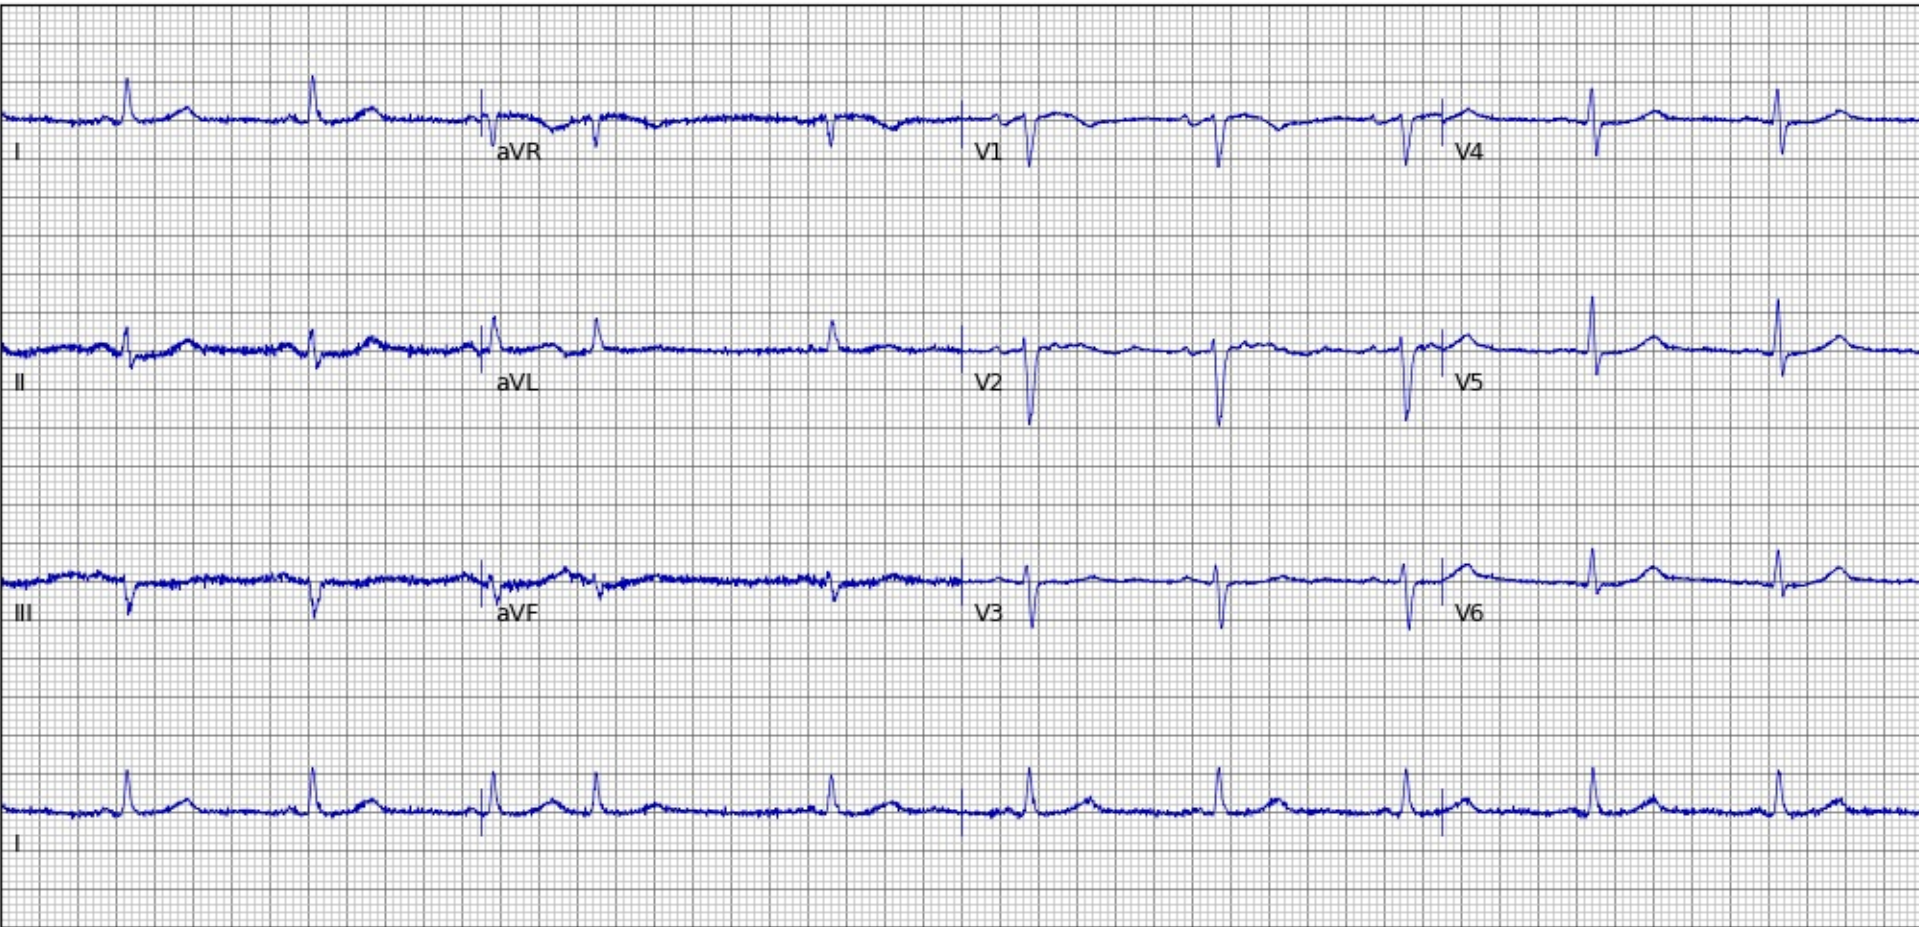



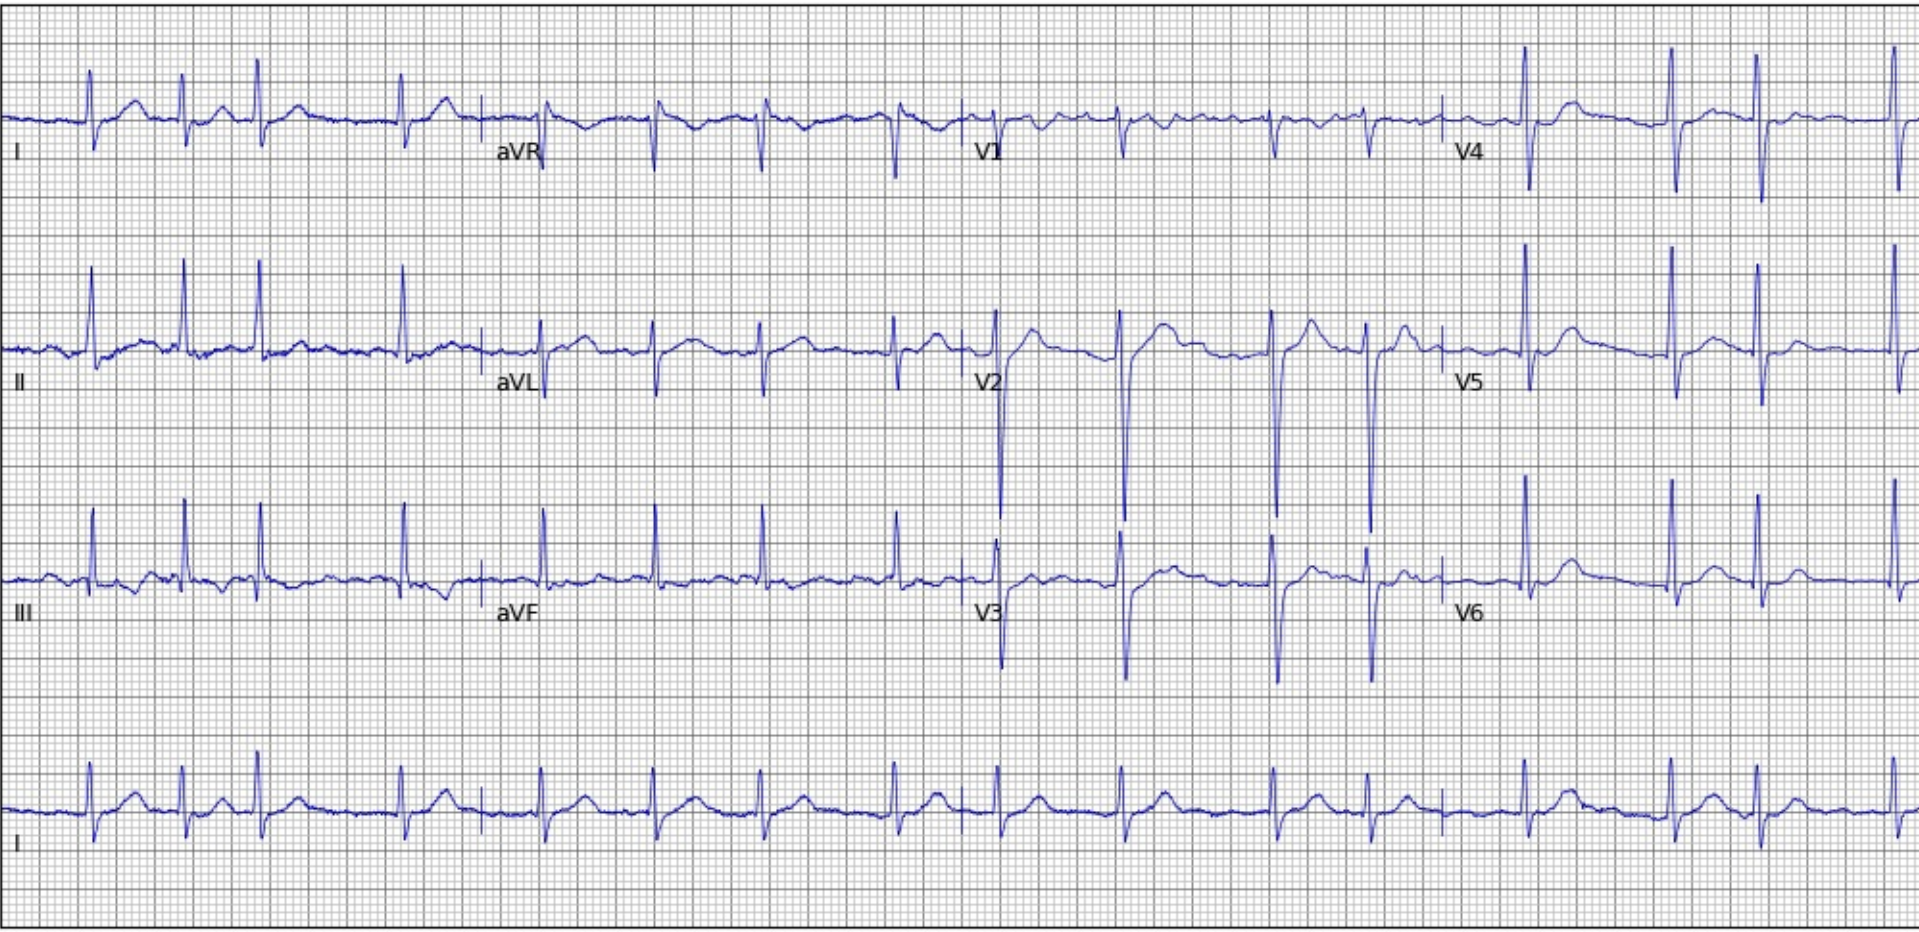

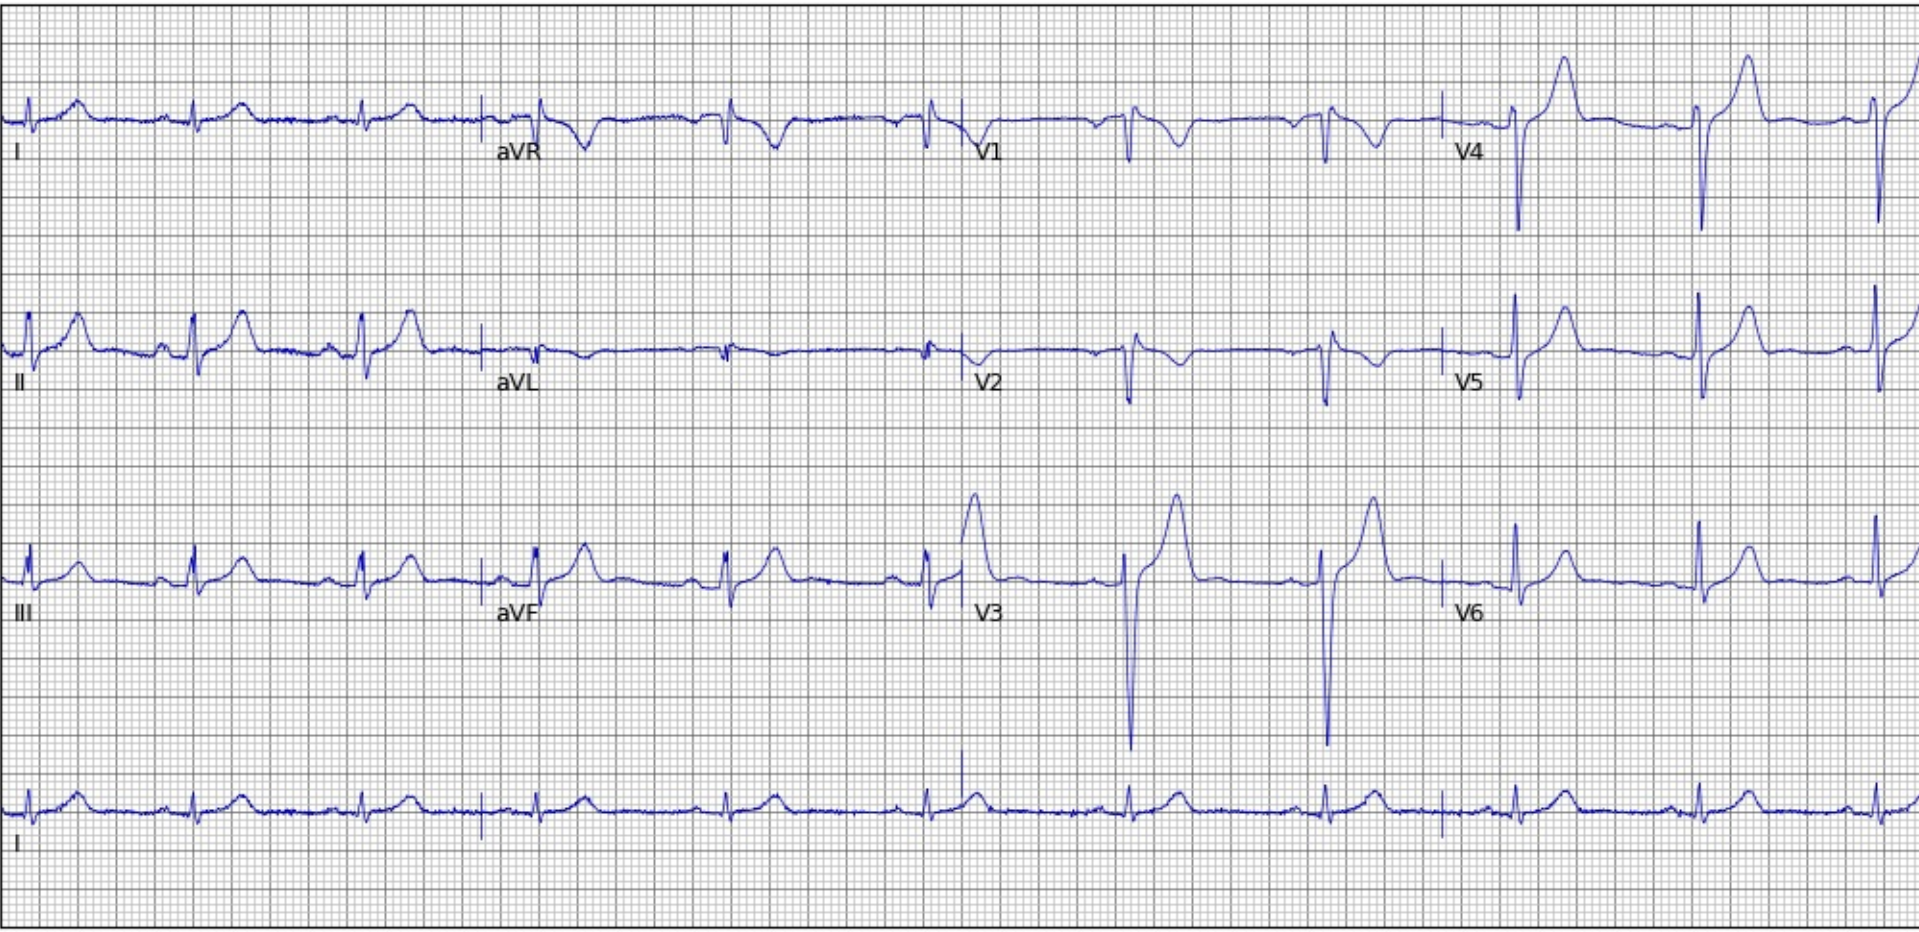



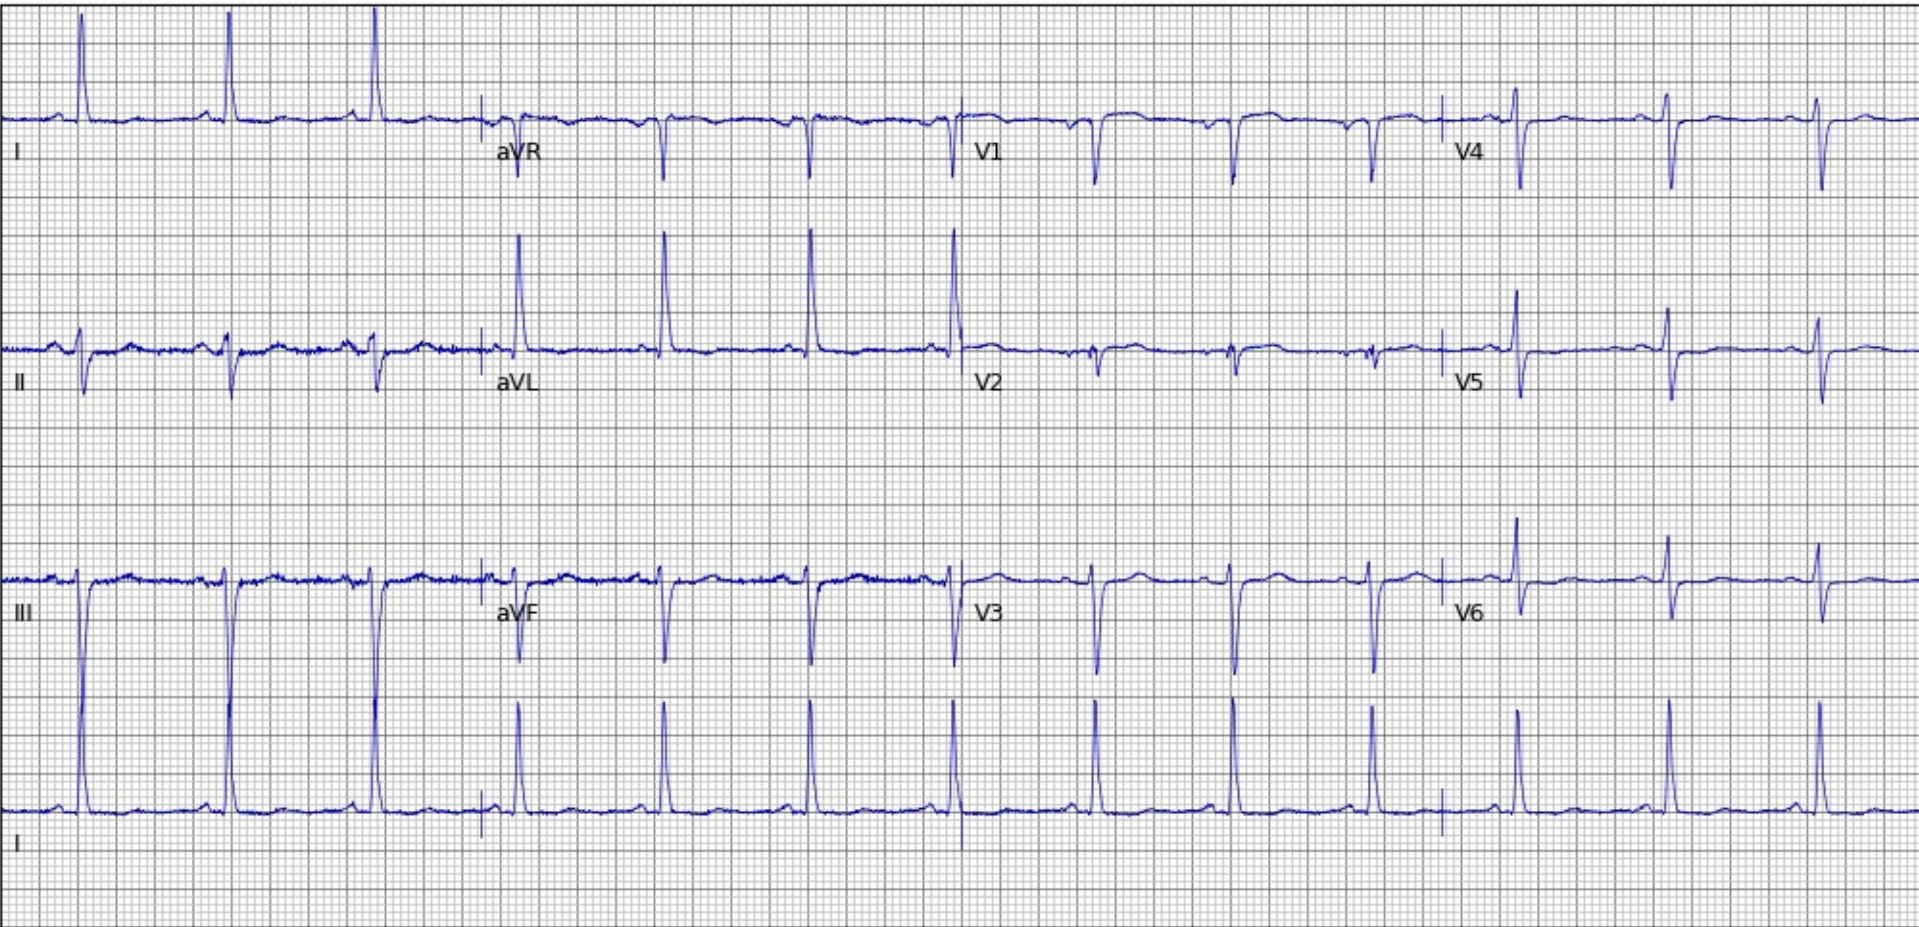



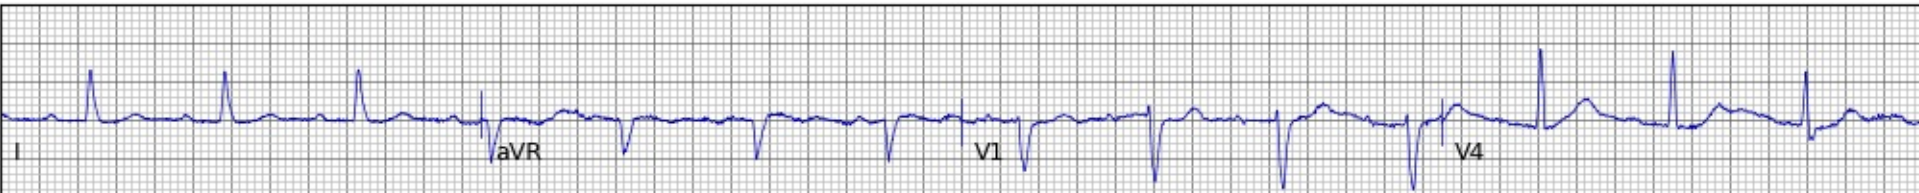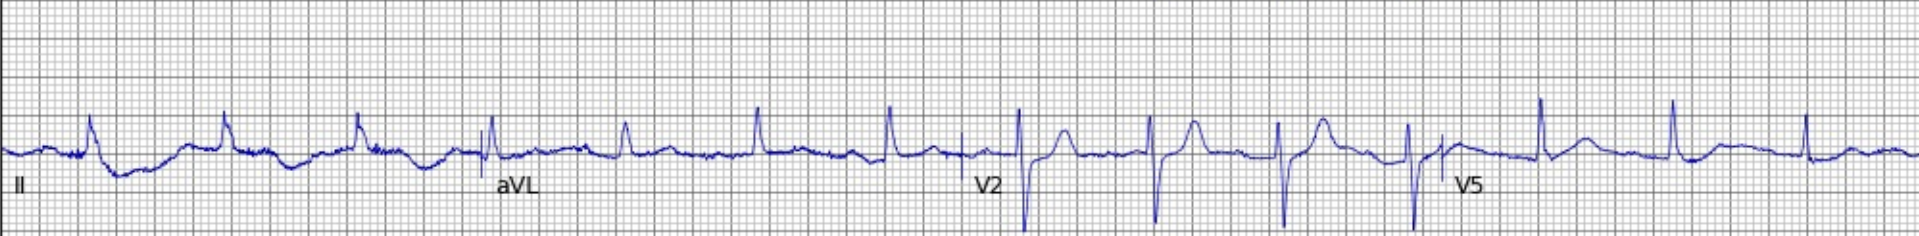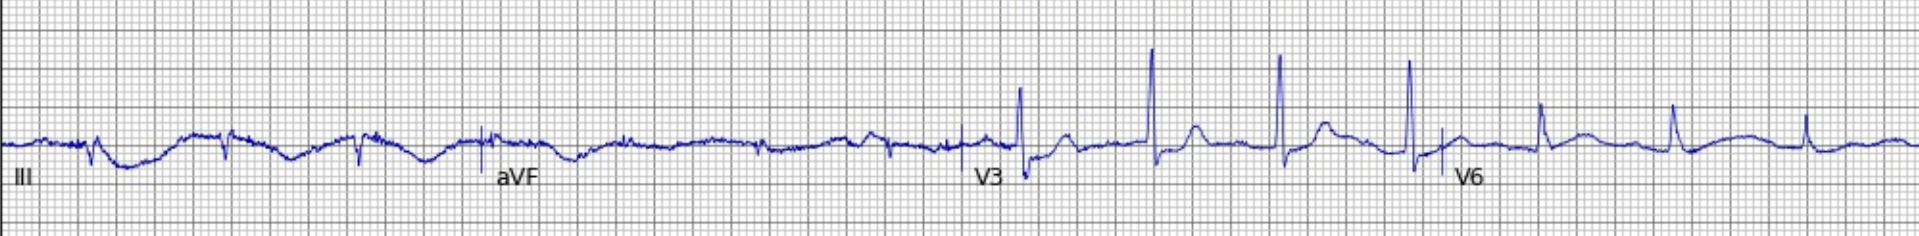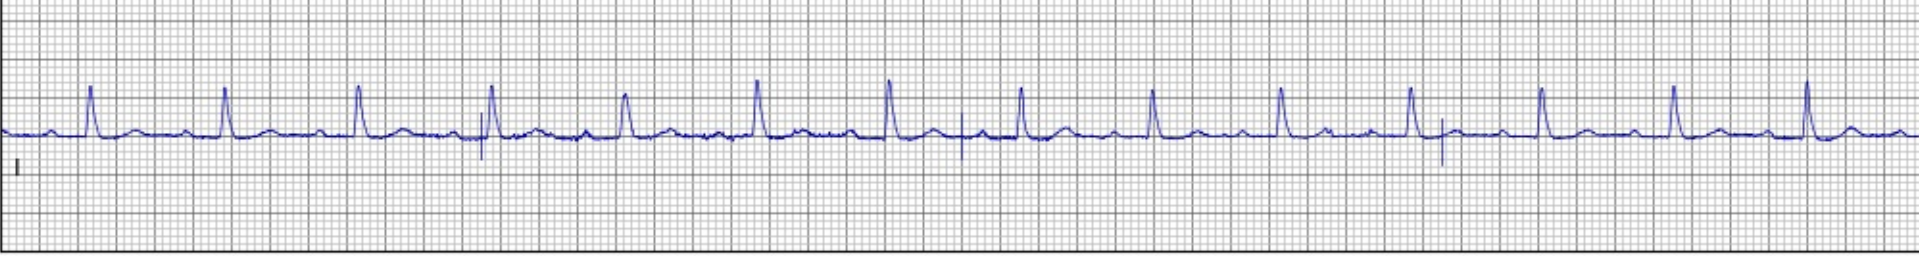

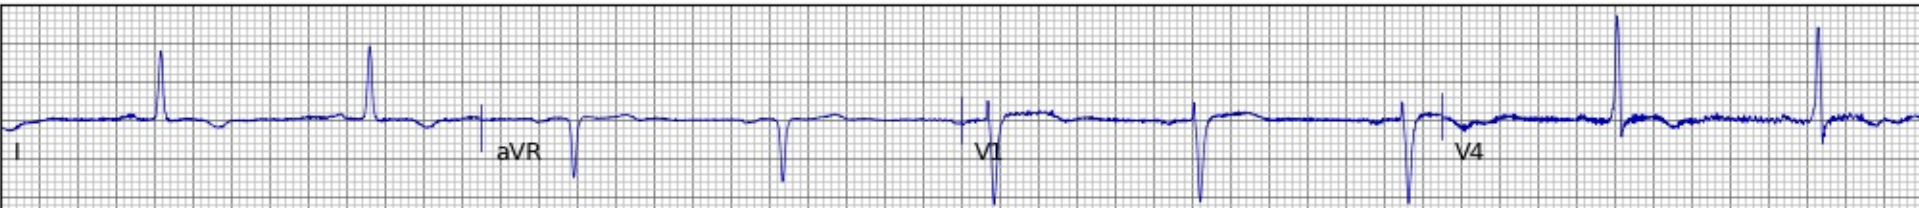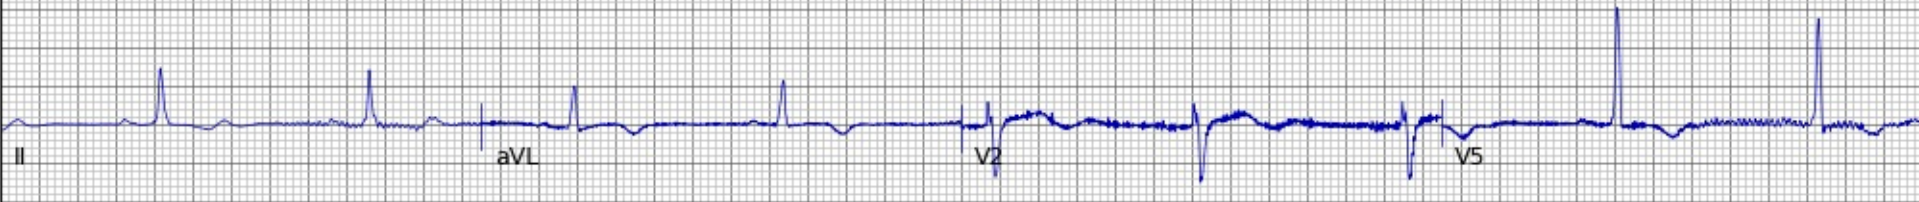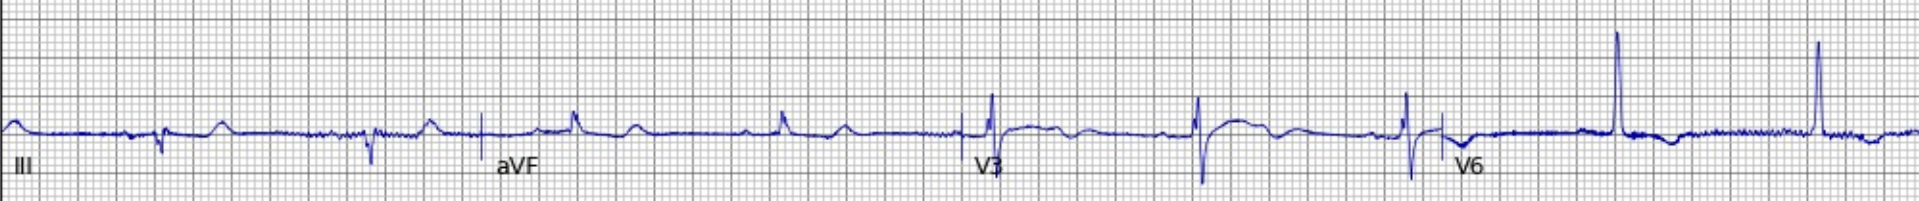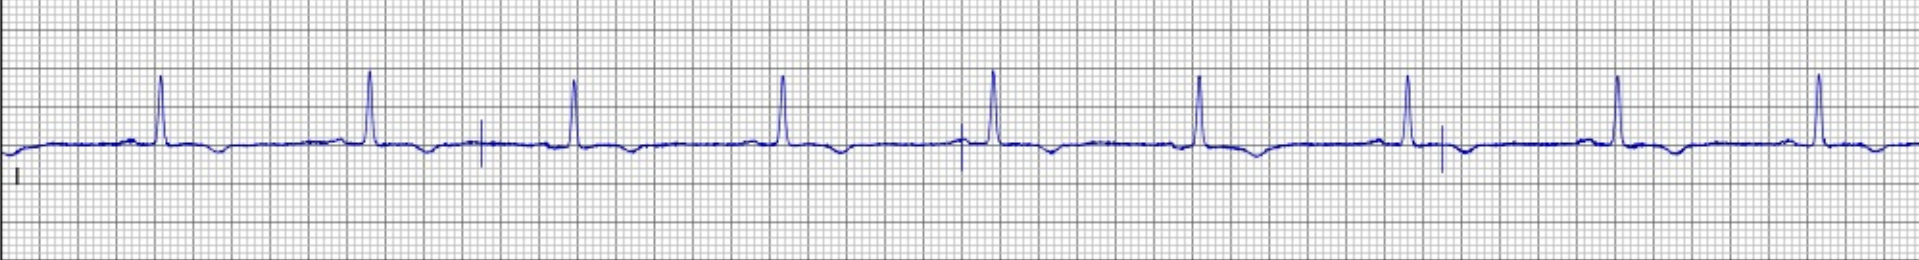



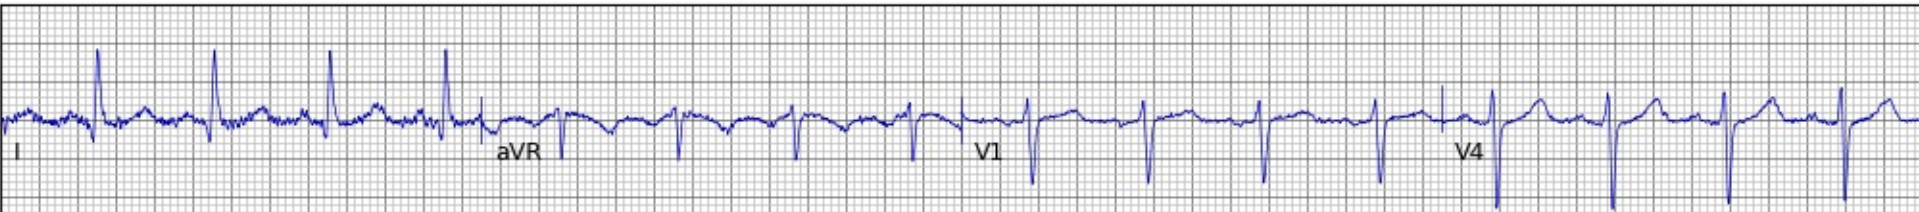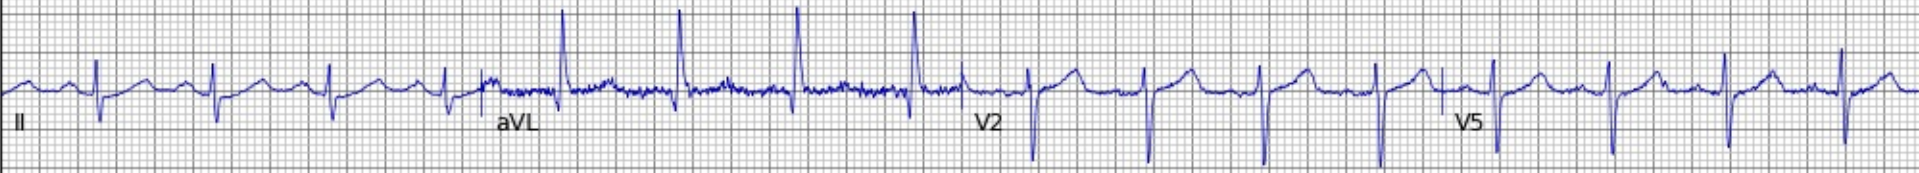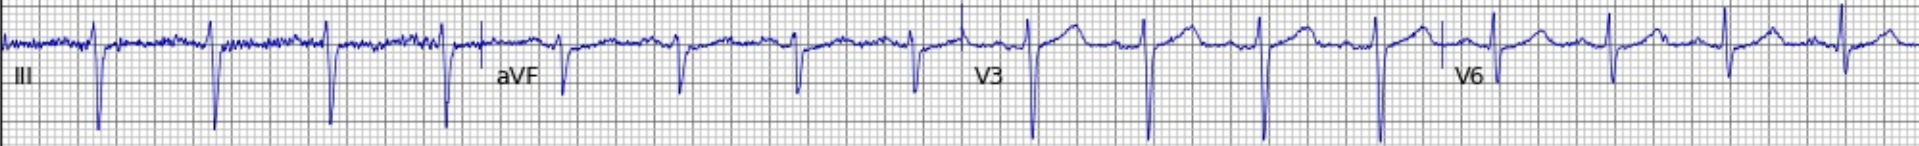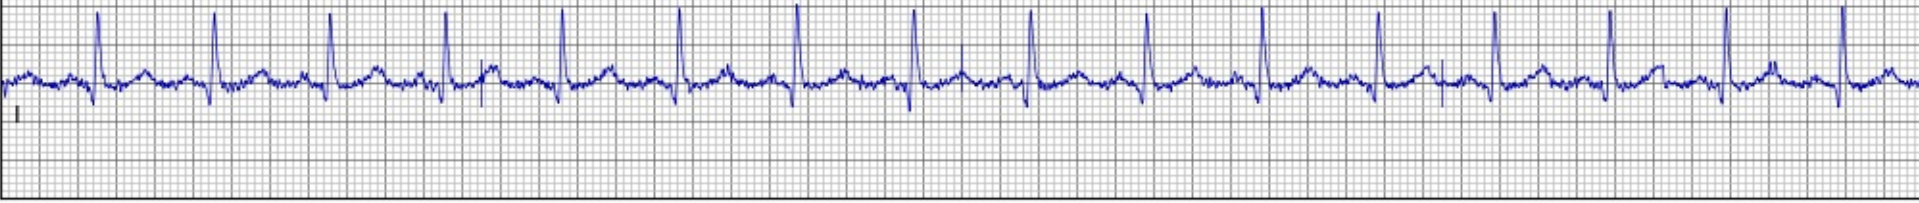



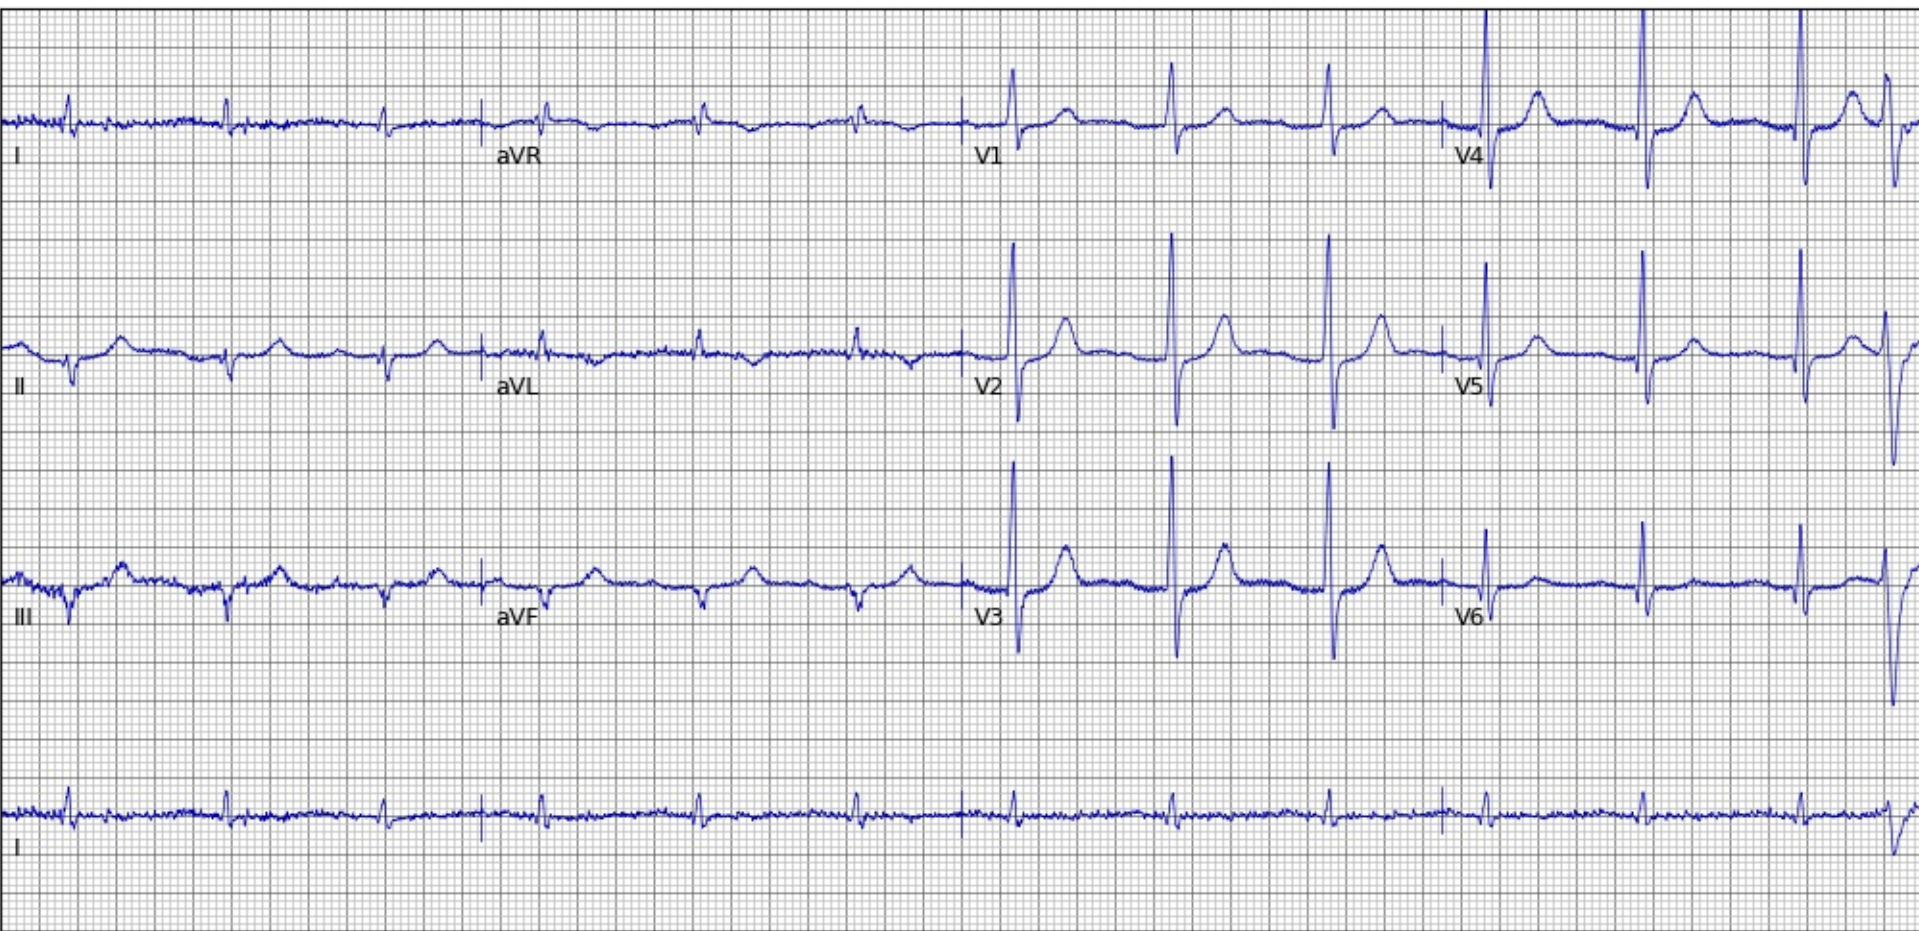

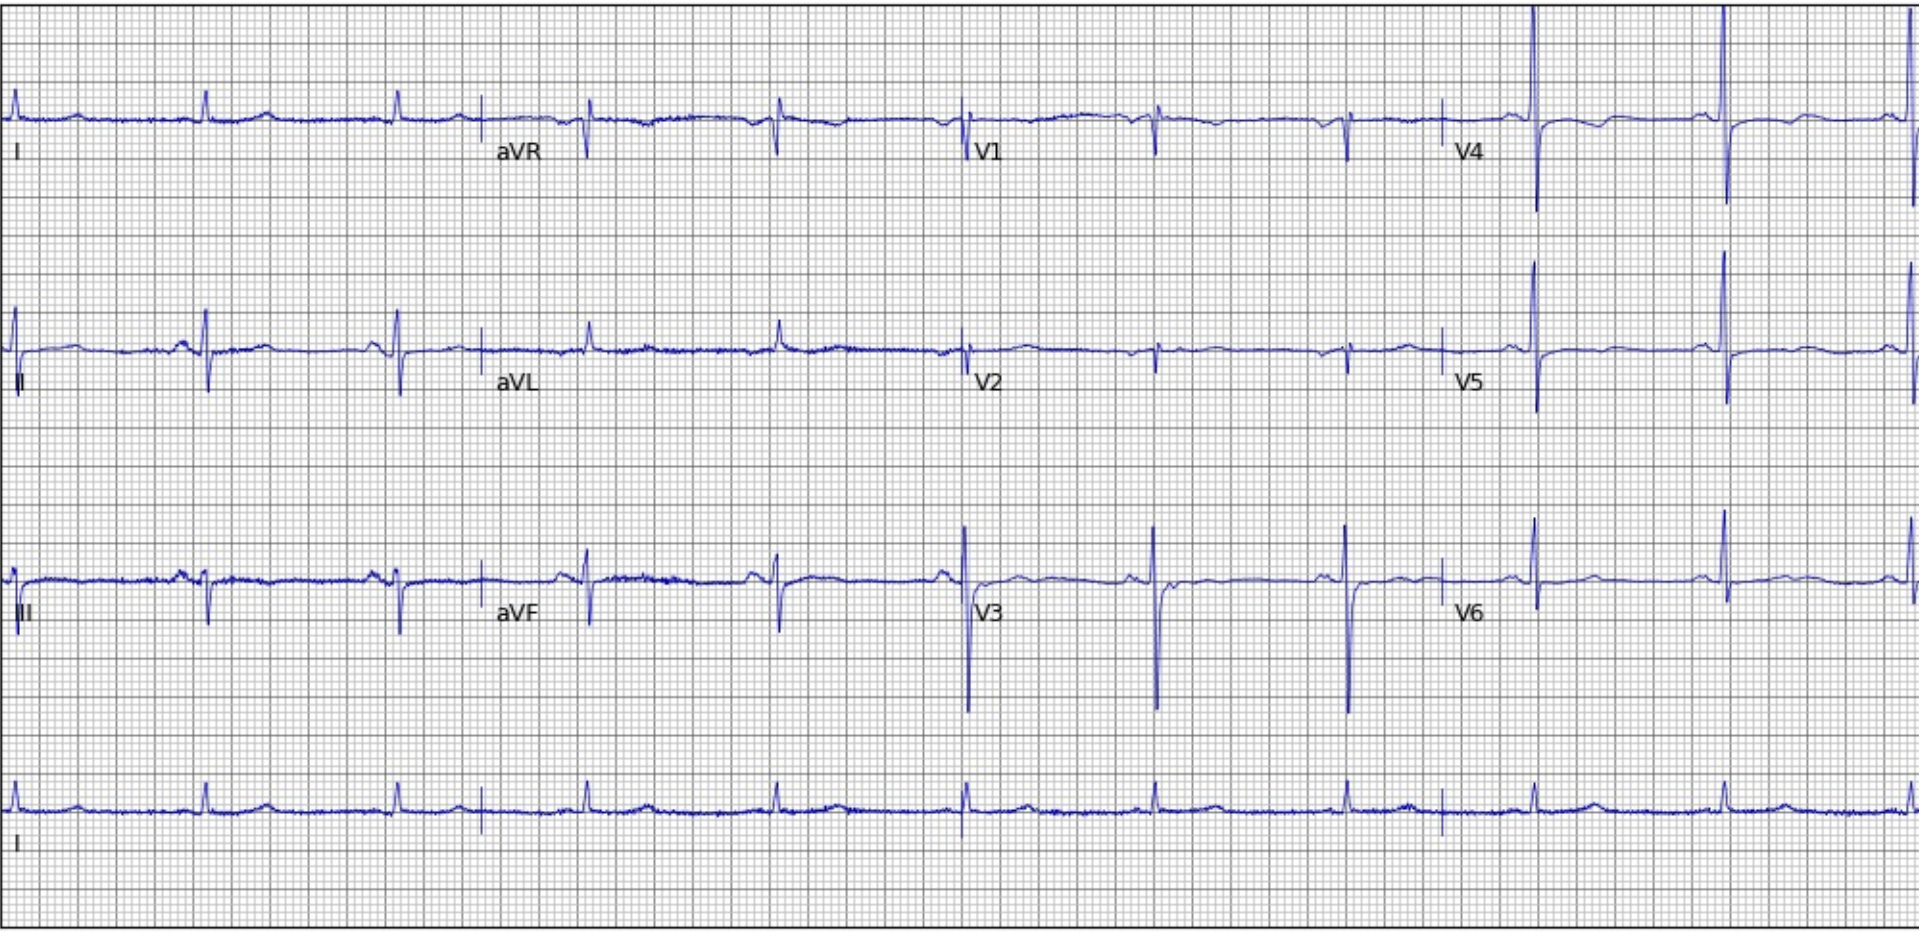



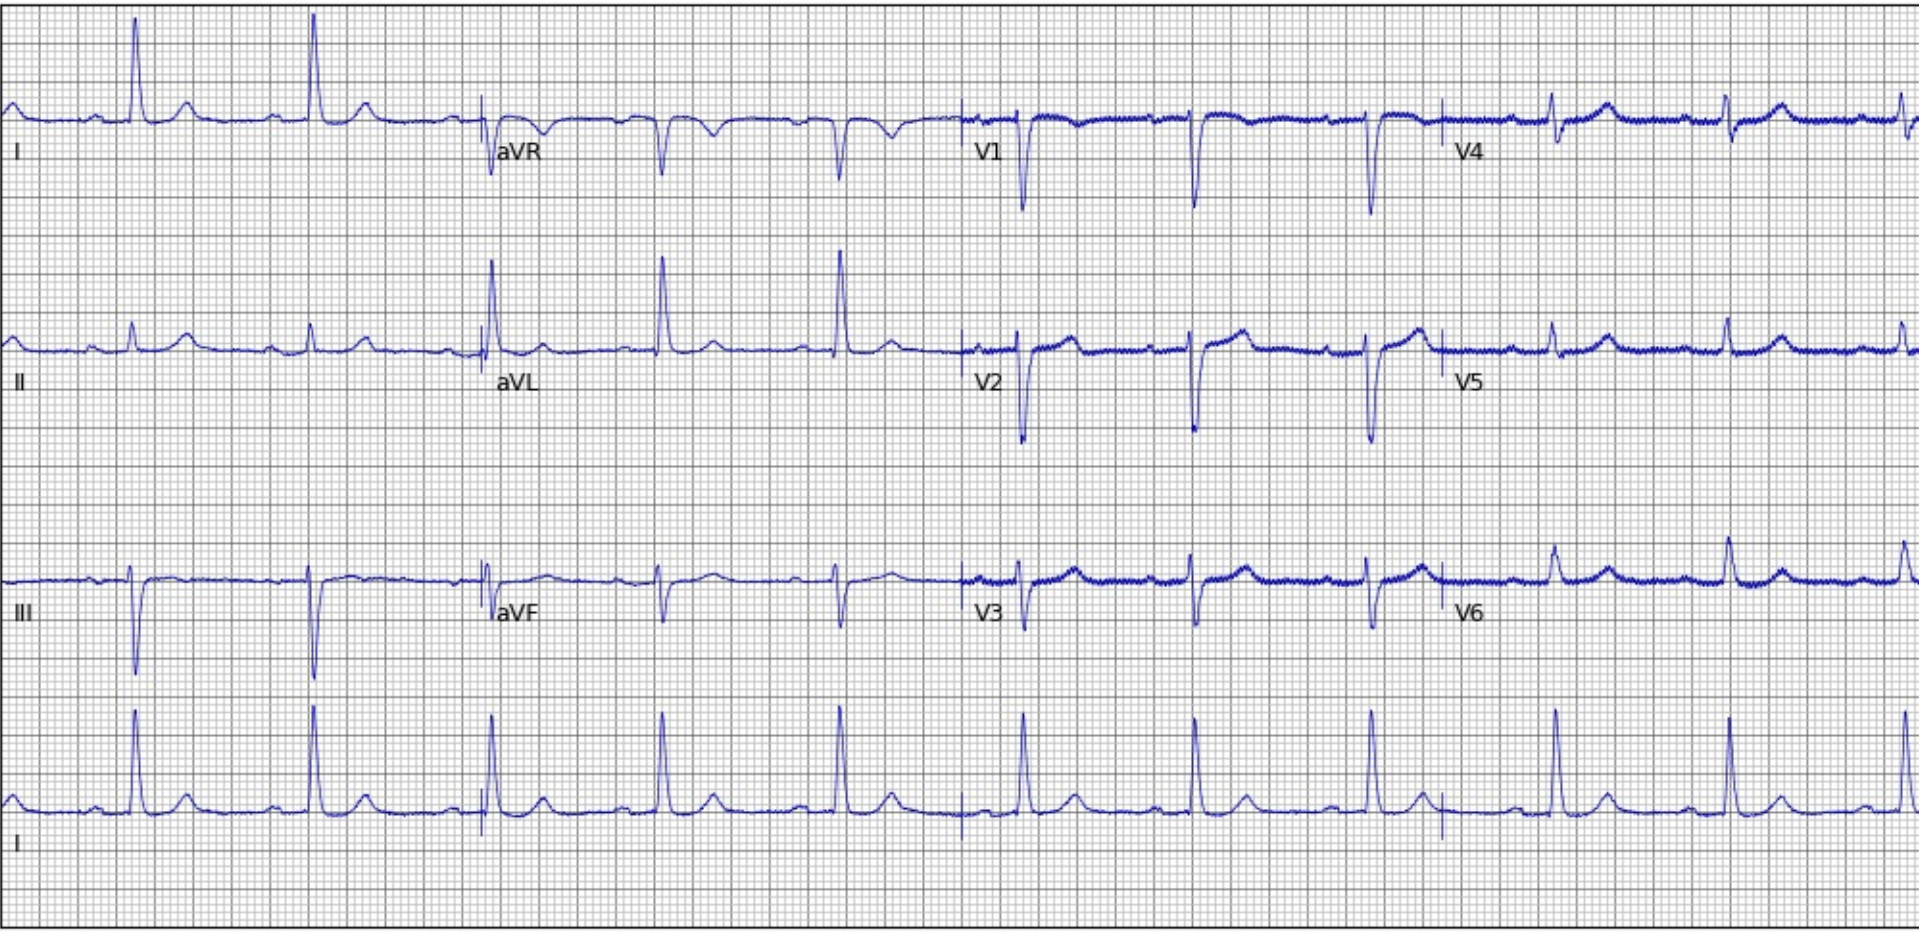



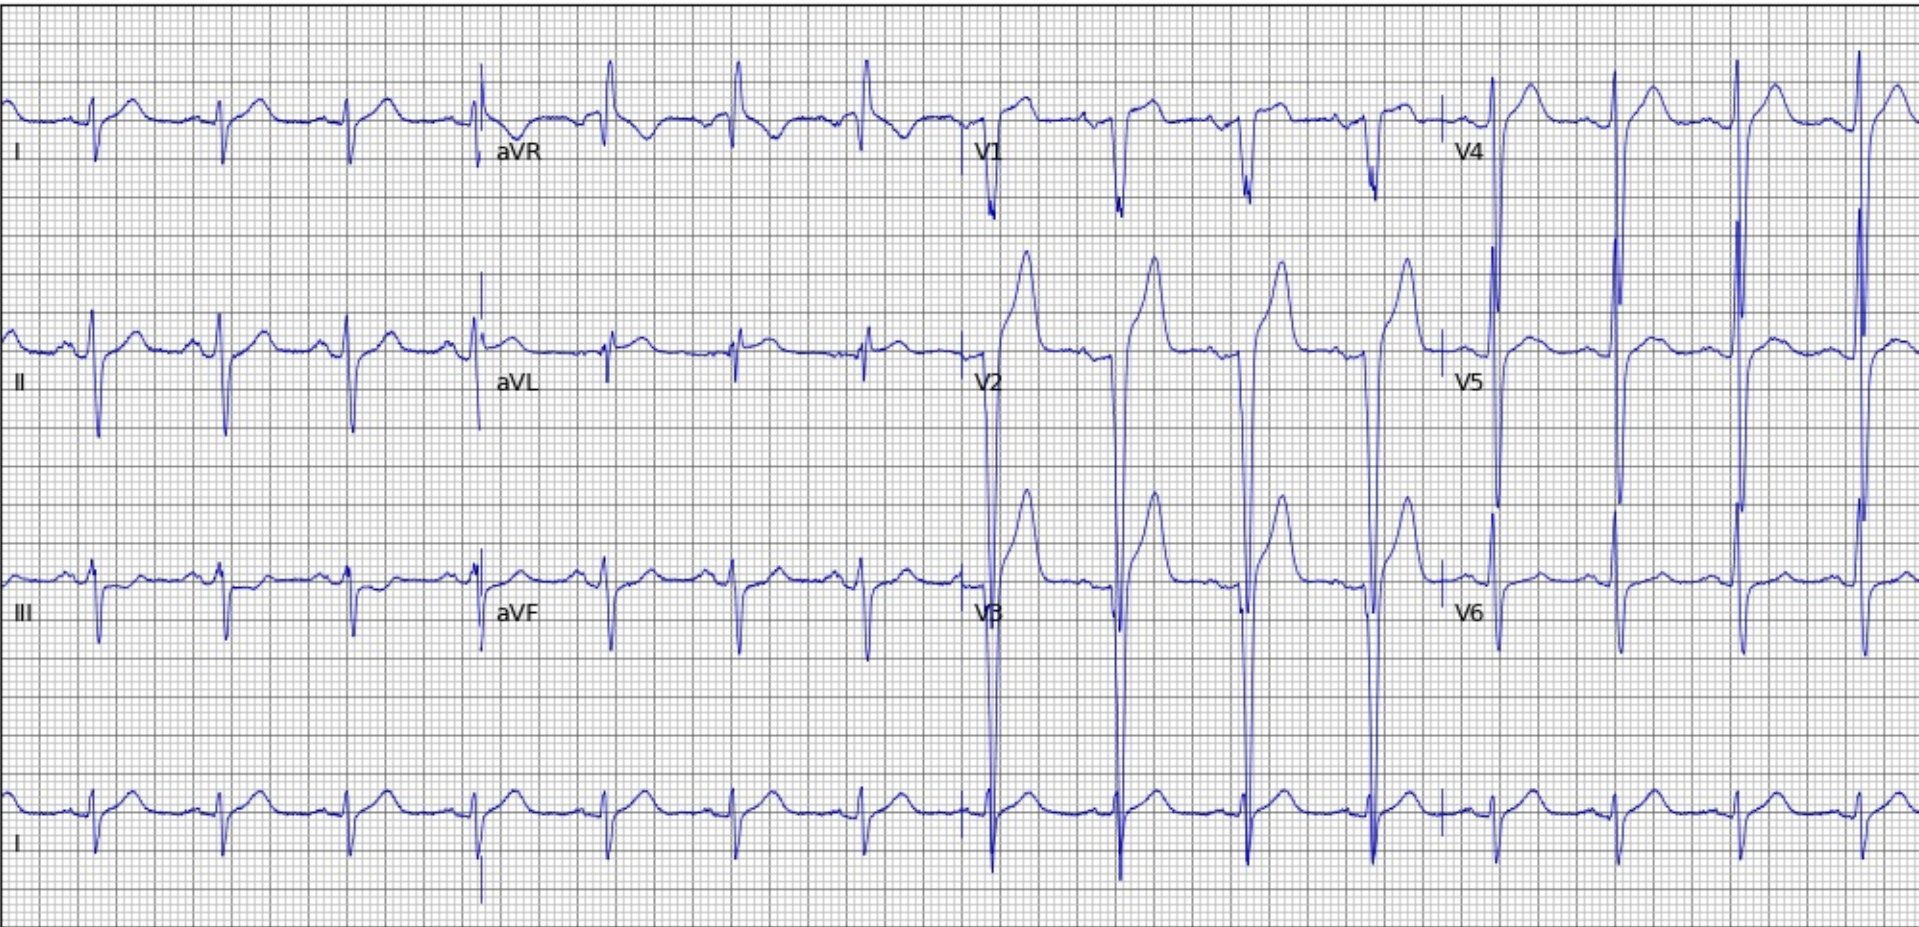

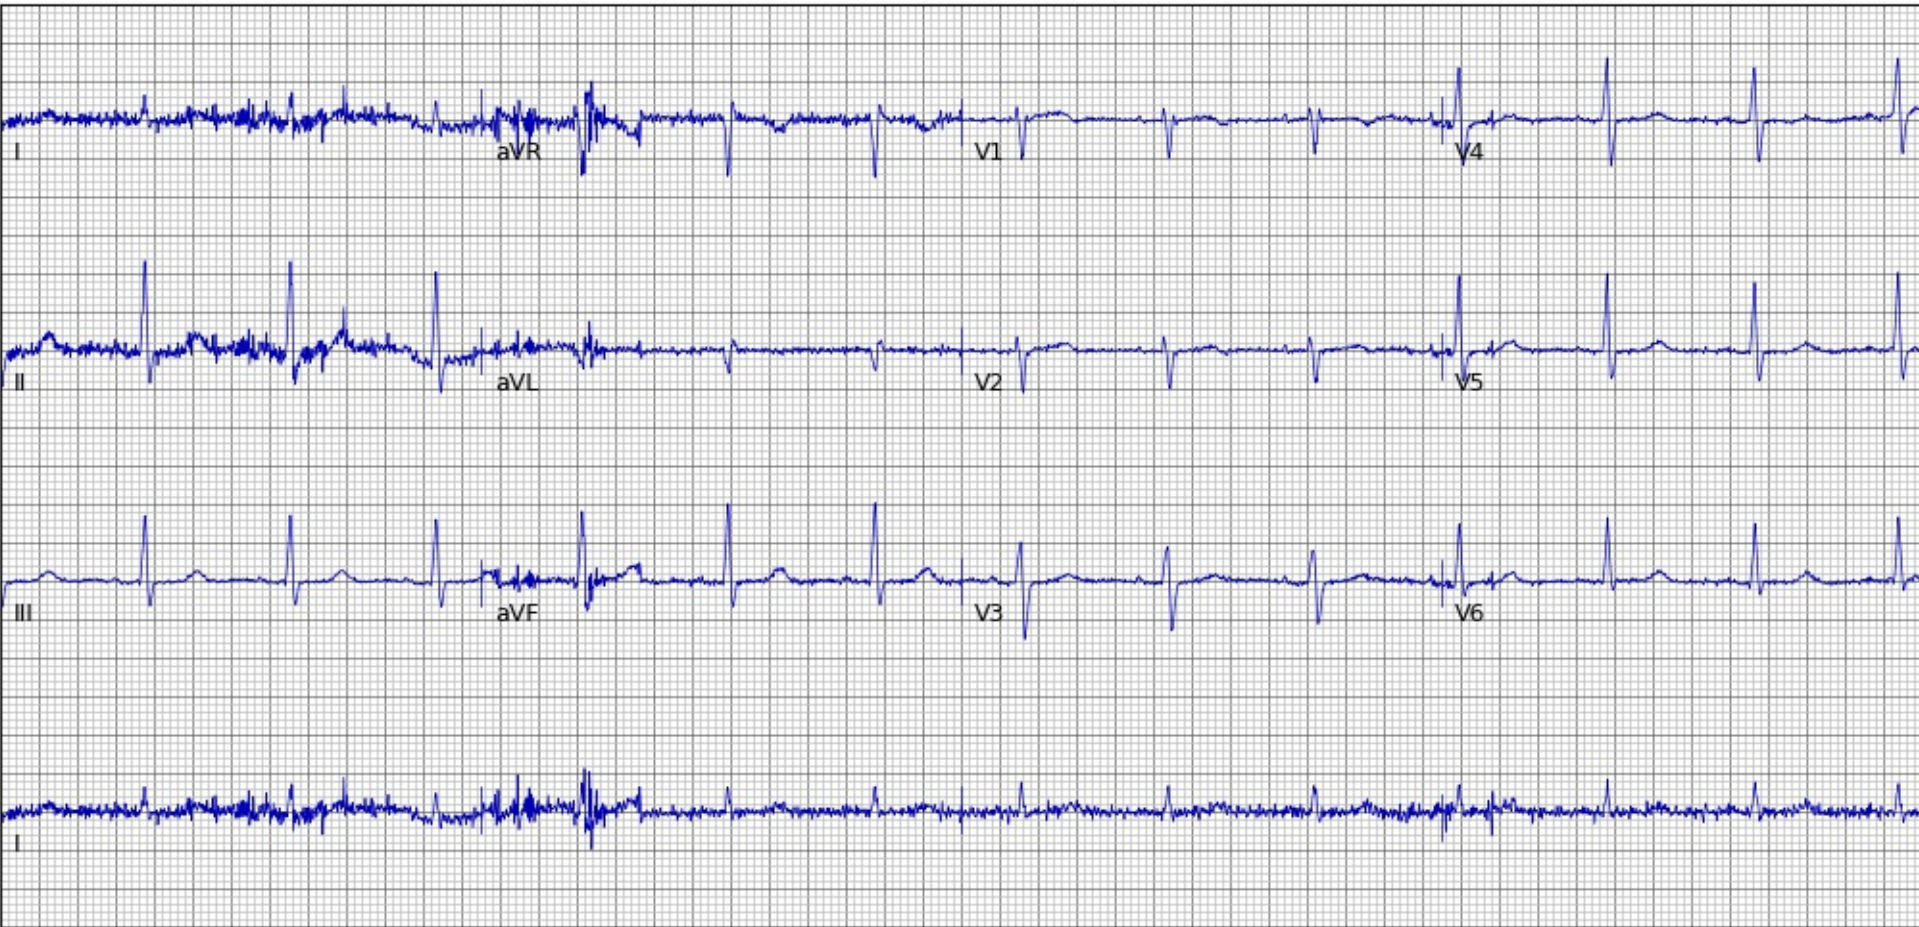

**Section 5. Random examples of 25 electrocardiogram images plotted in novel format (Black-on-Black Rhythm-on-top) not encountered during model development**



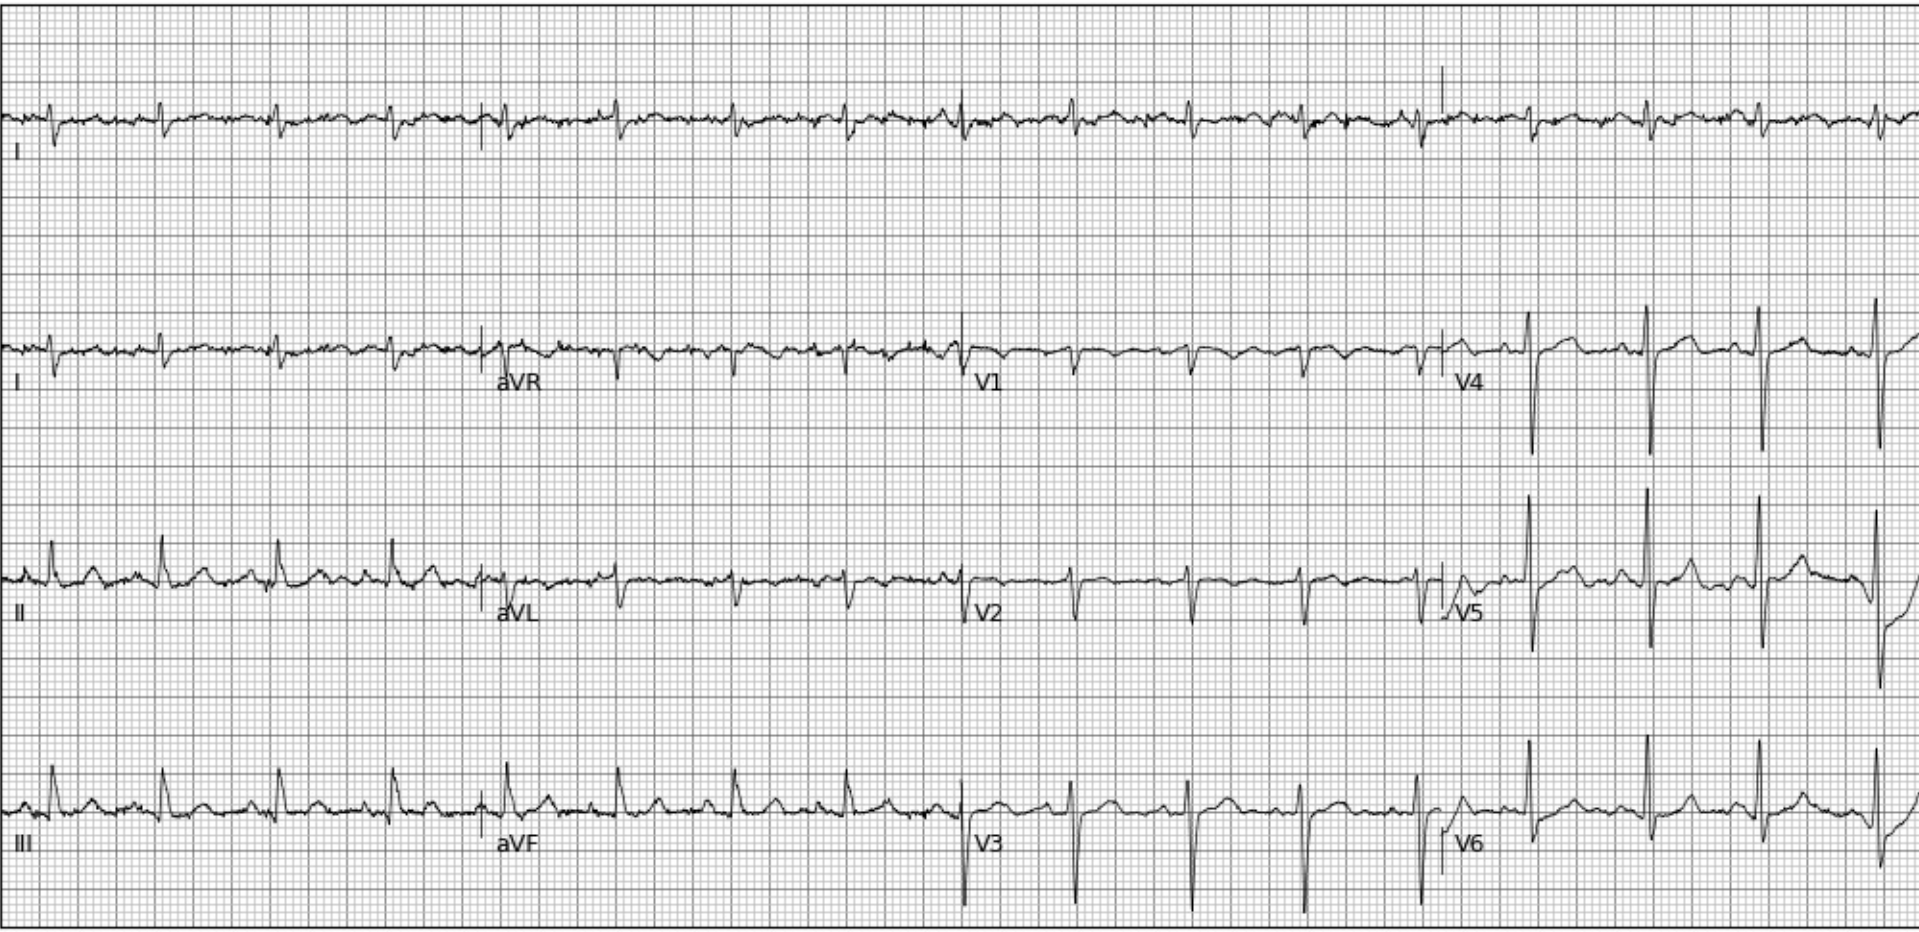

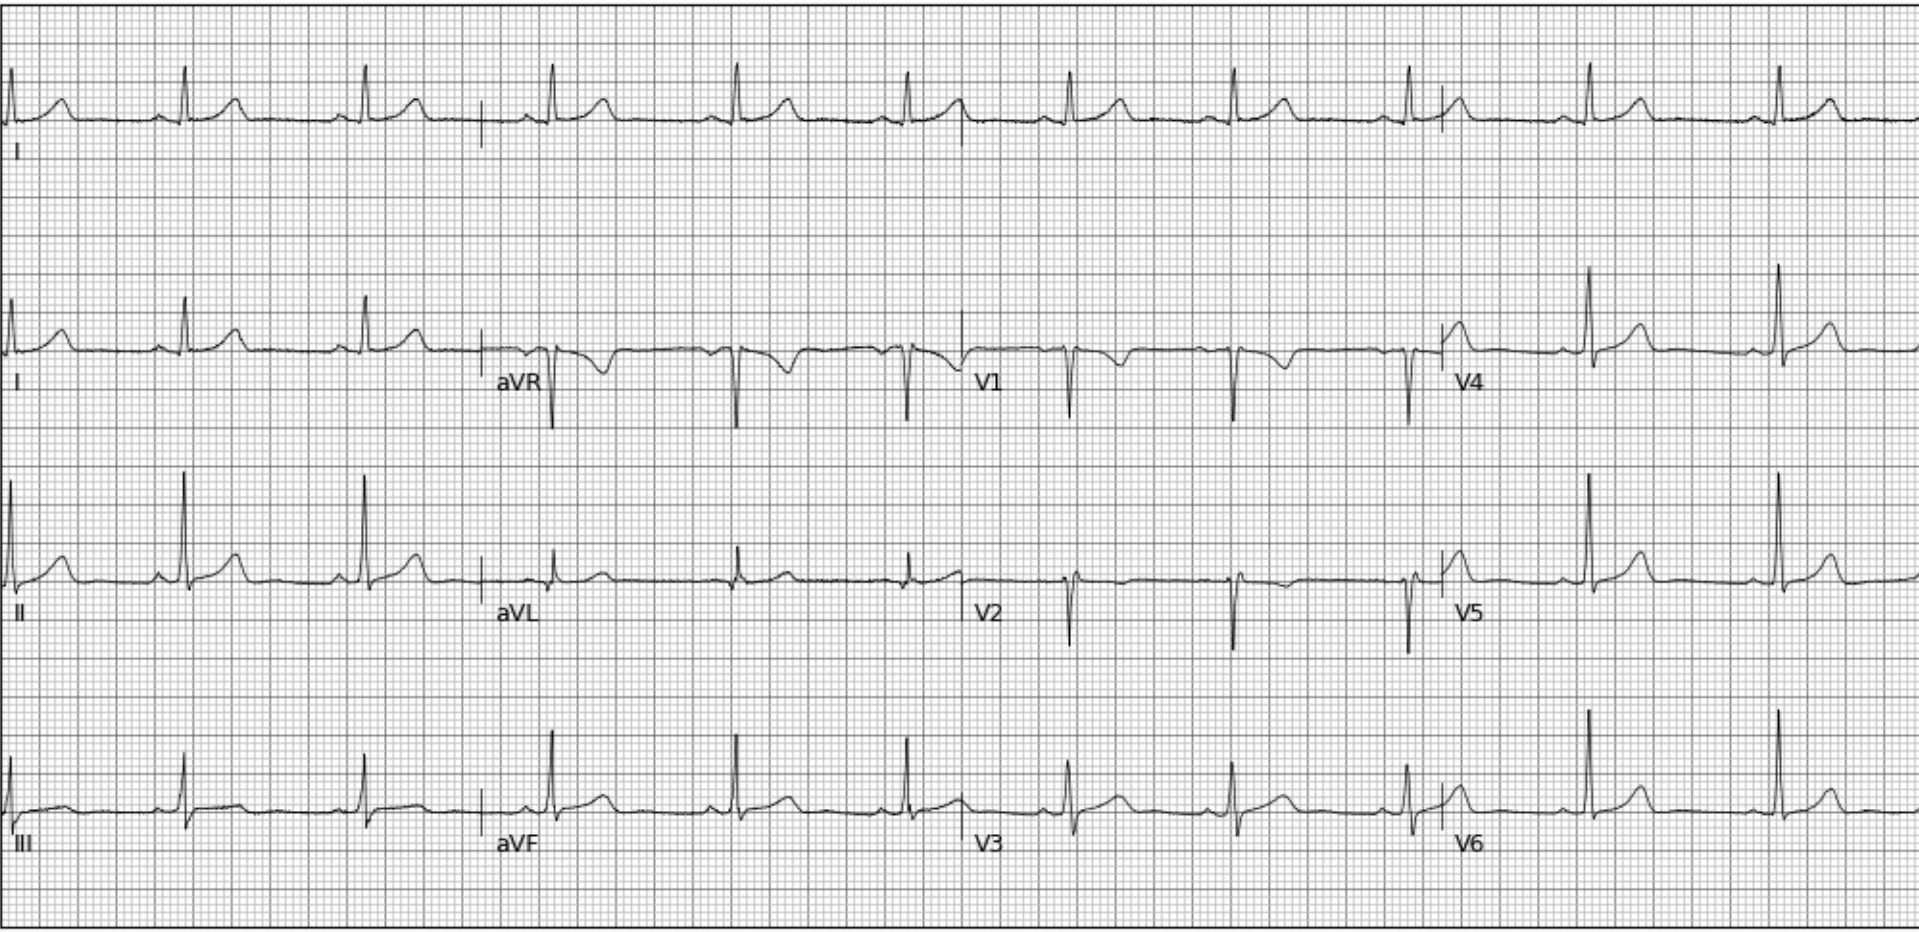

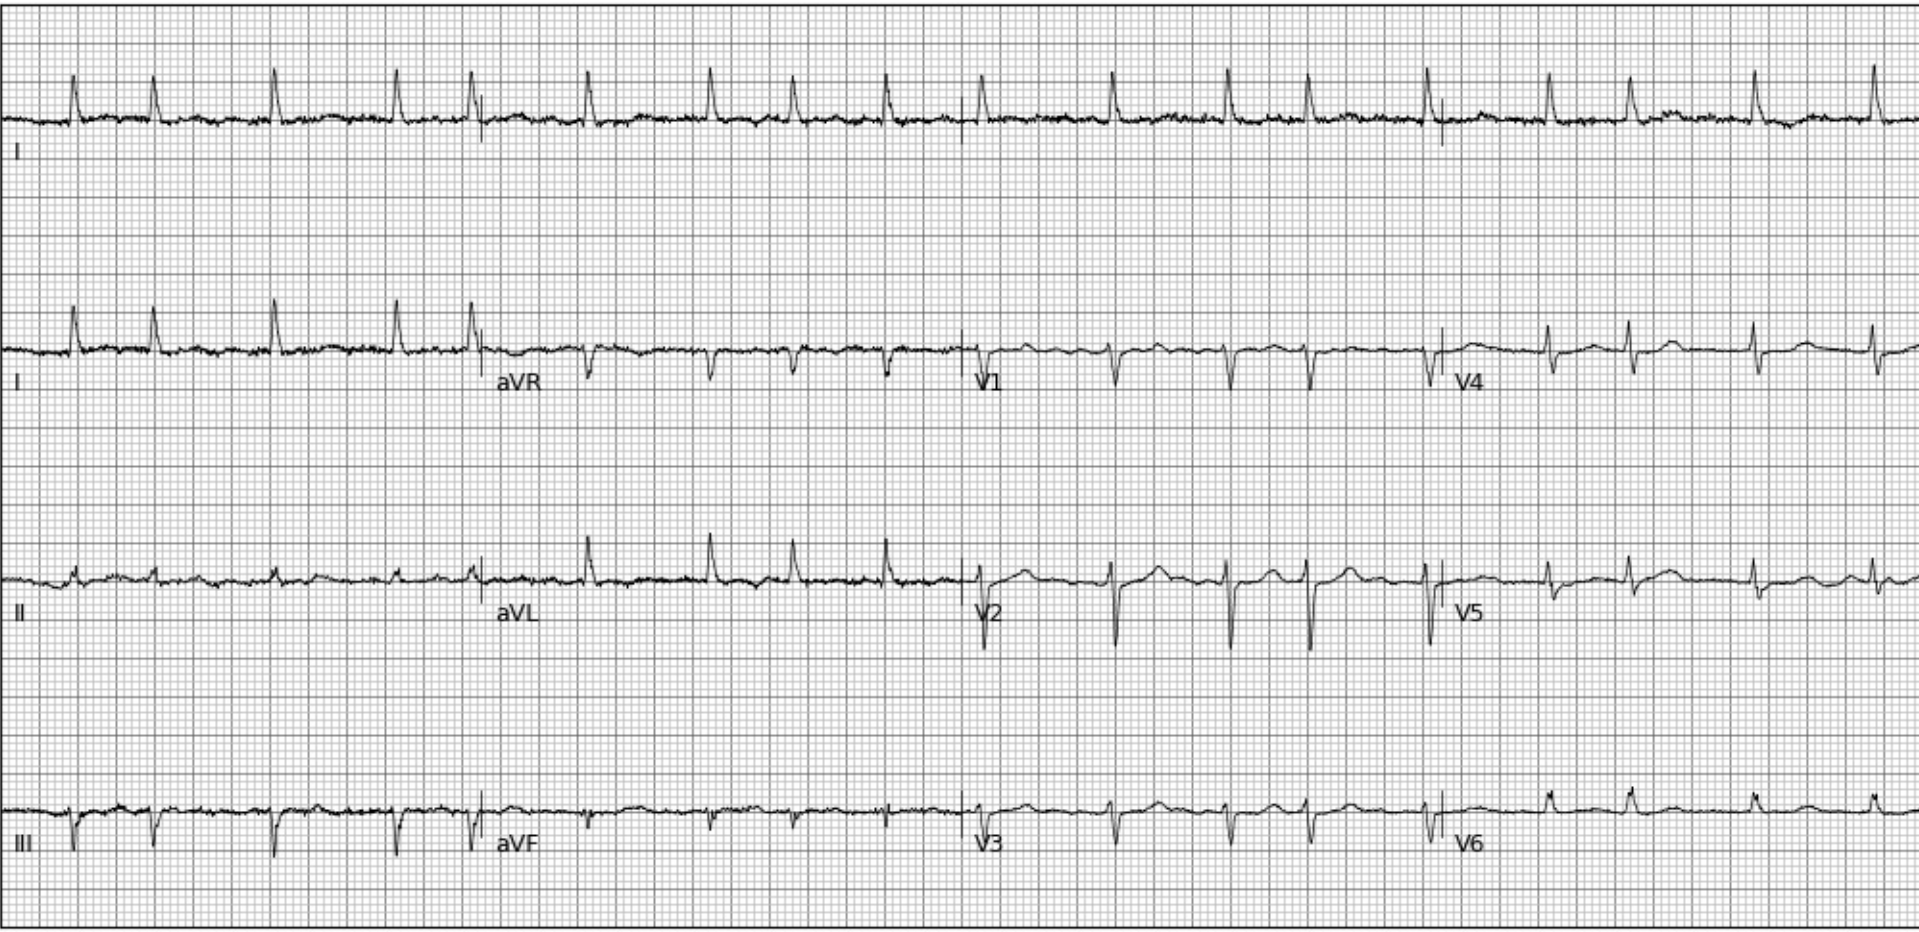



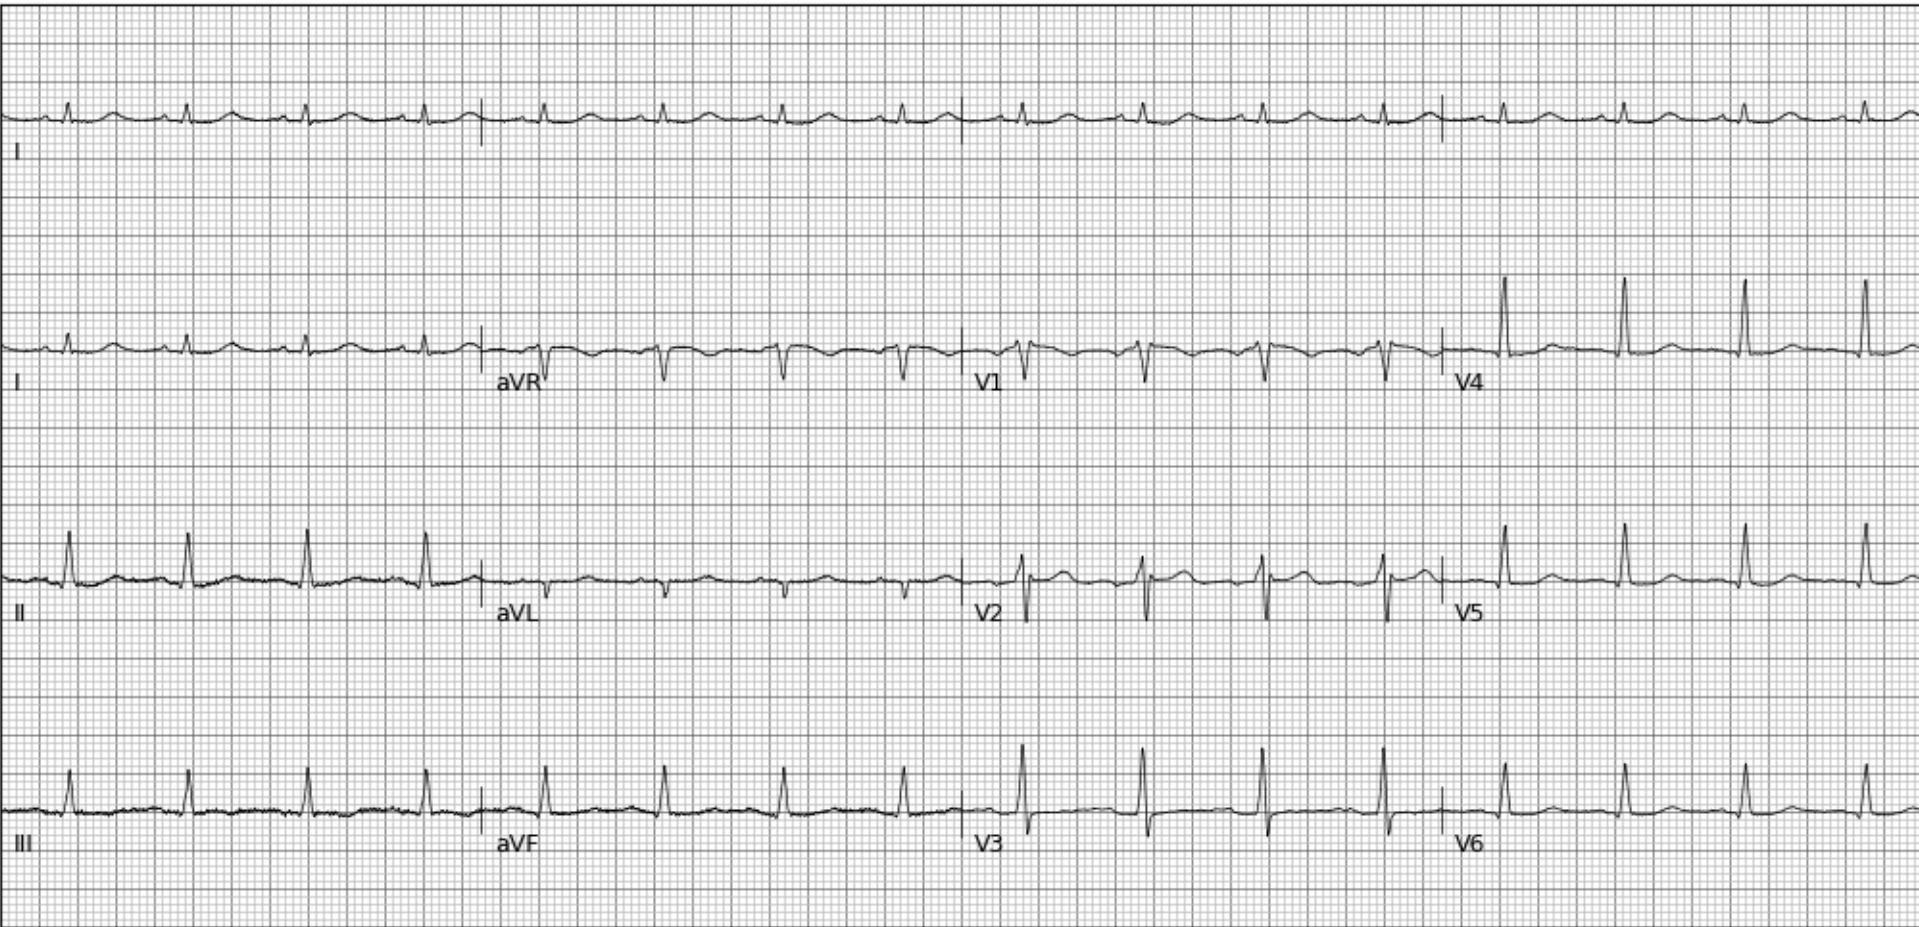

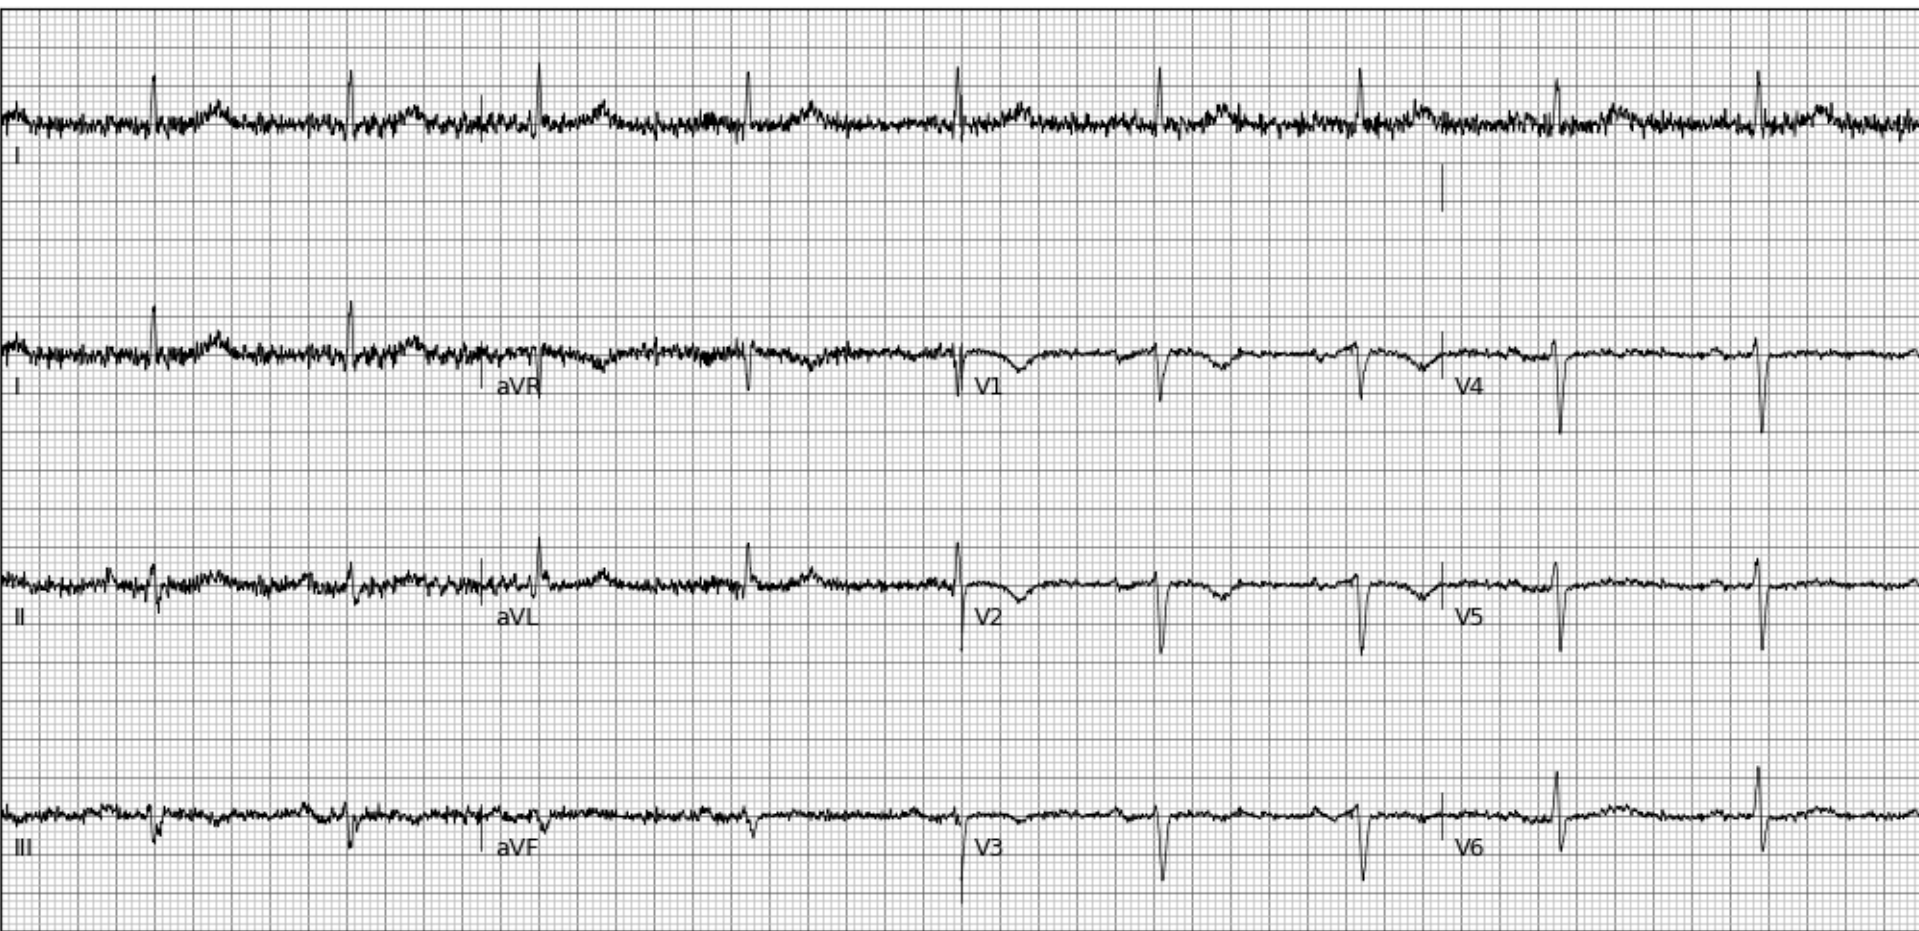

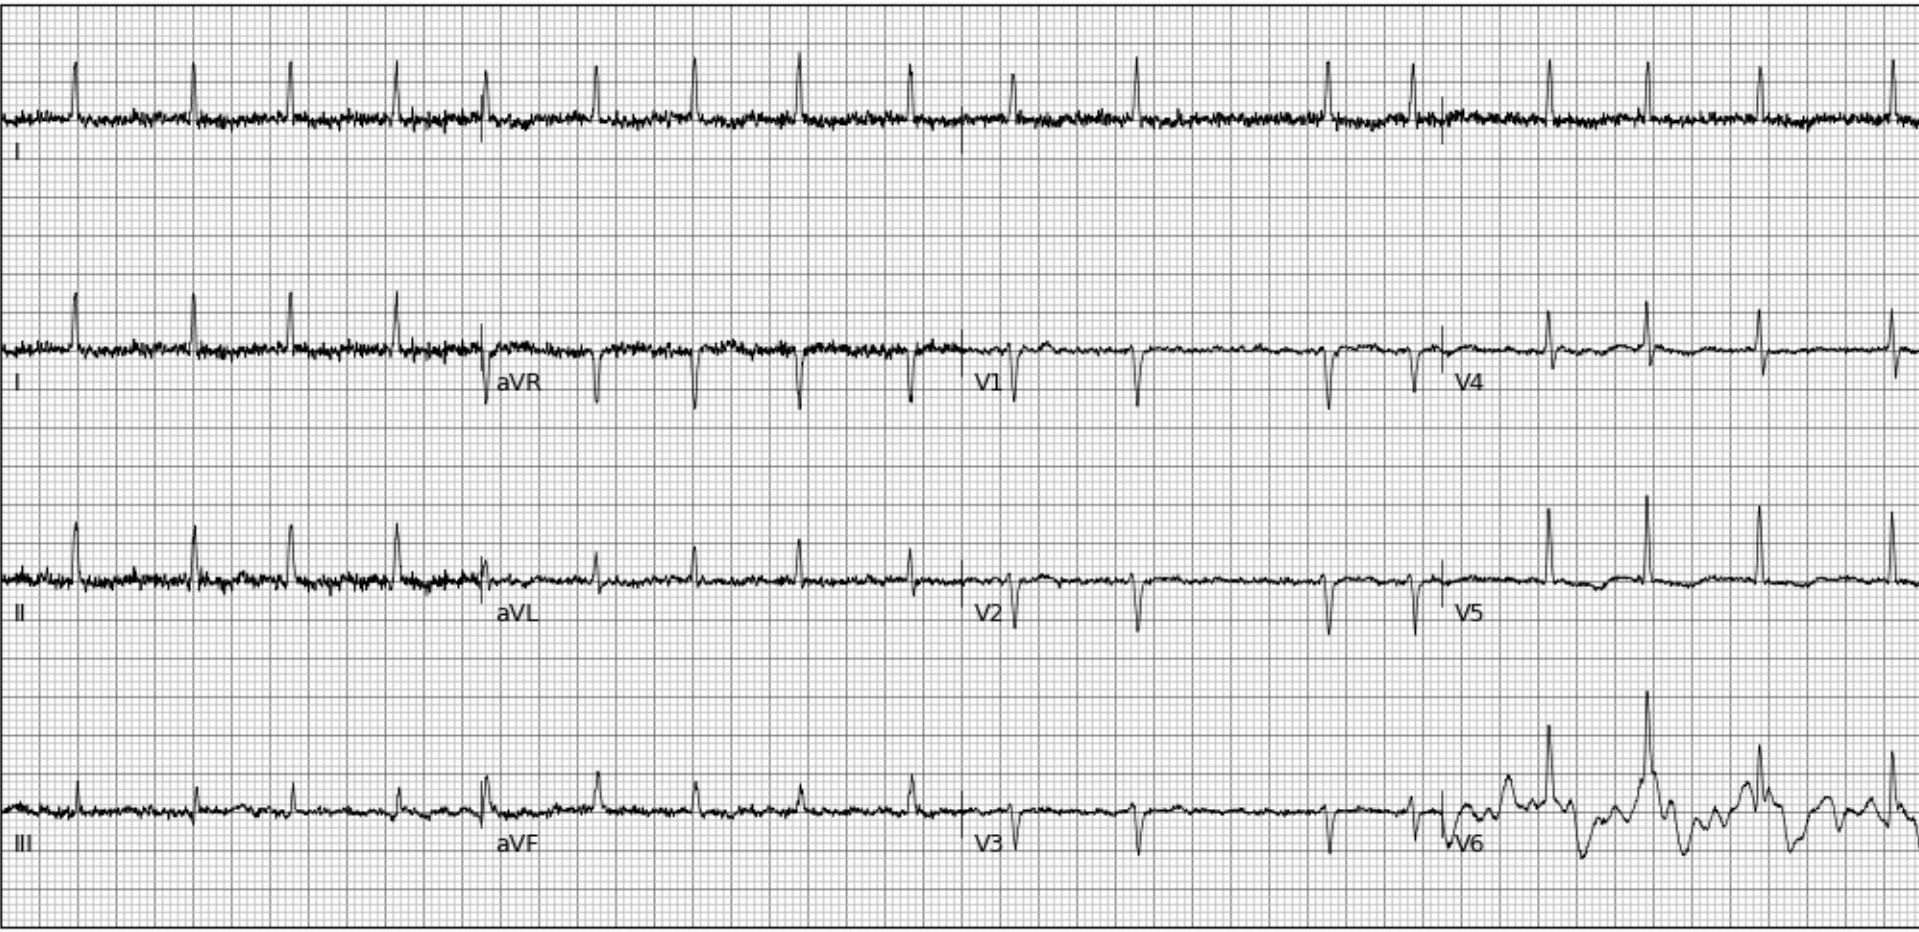



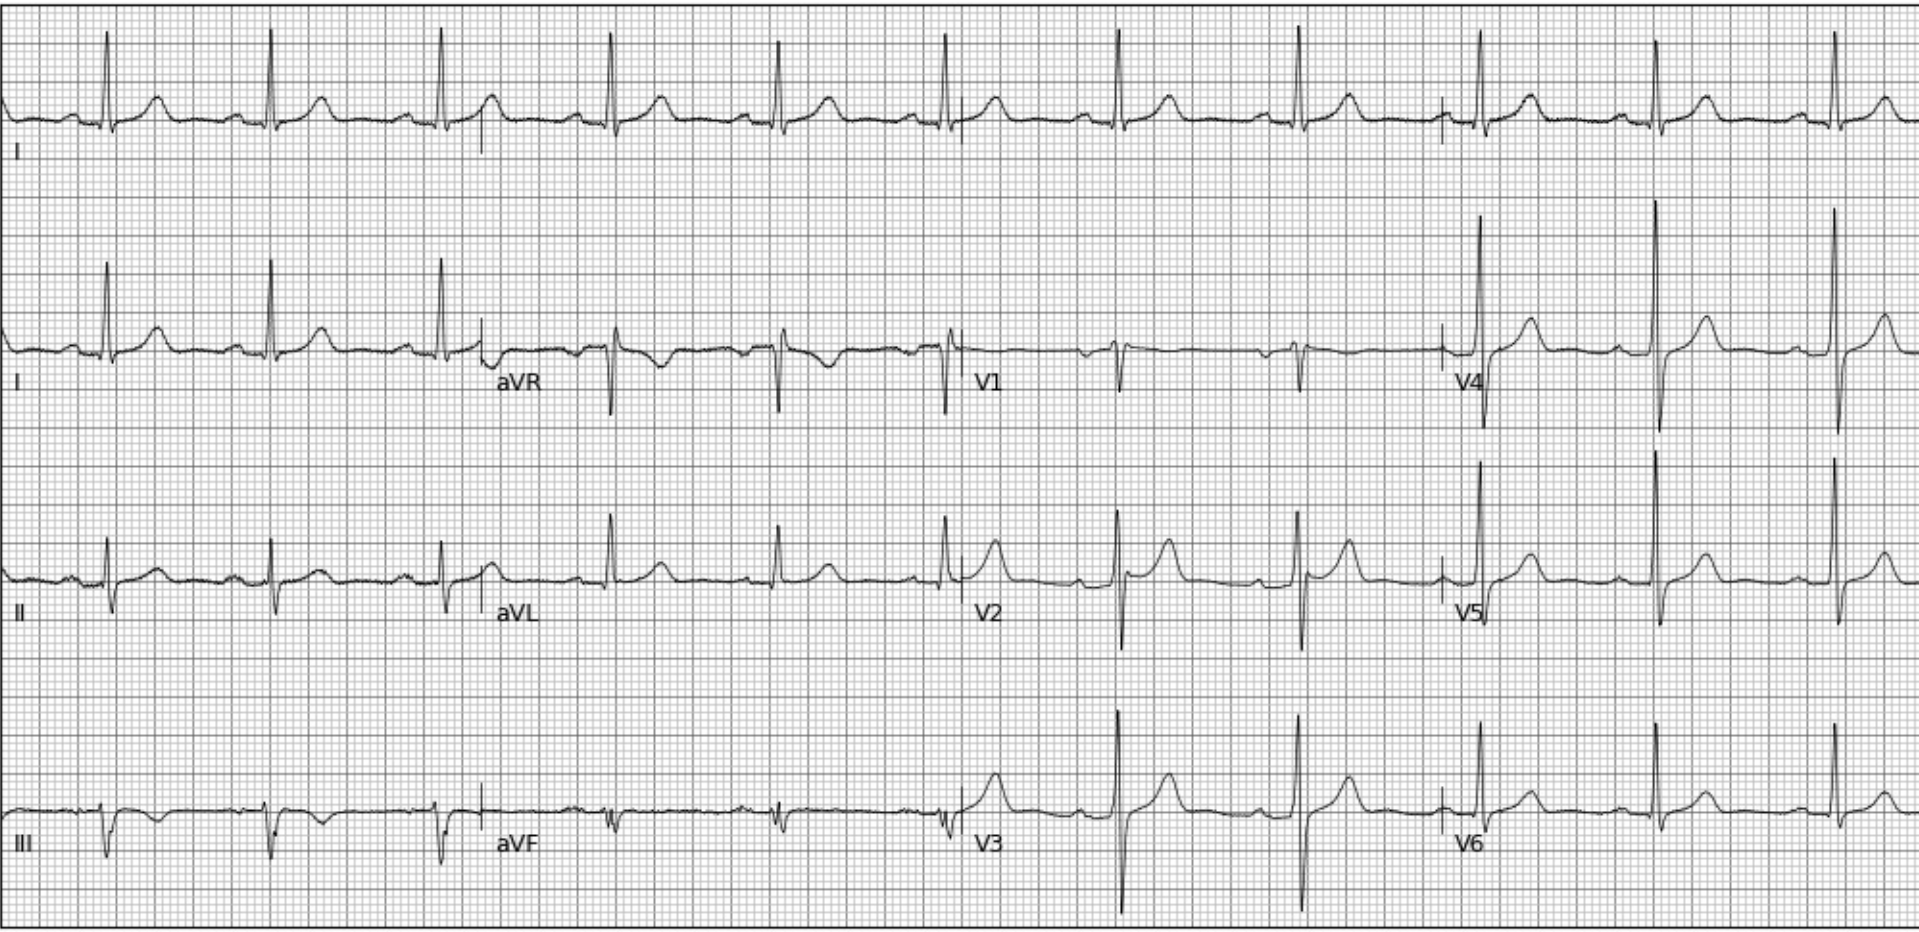

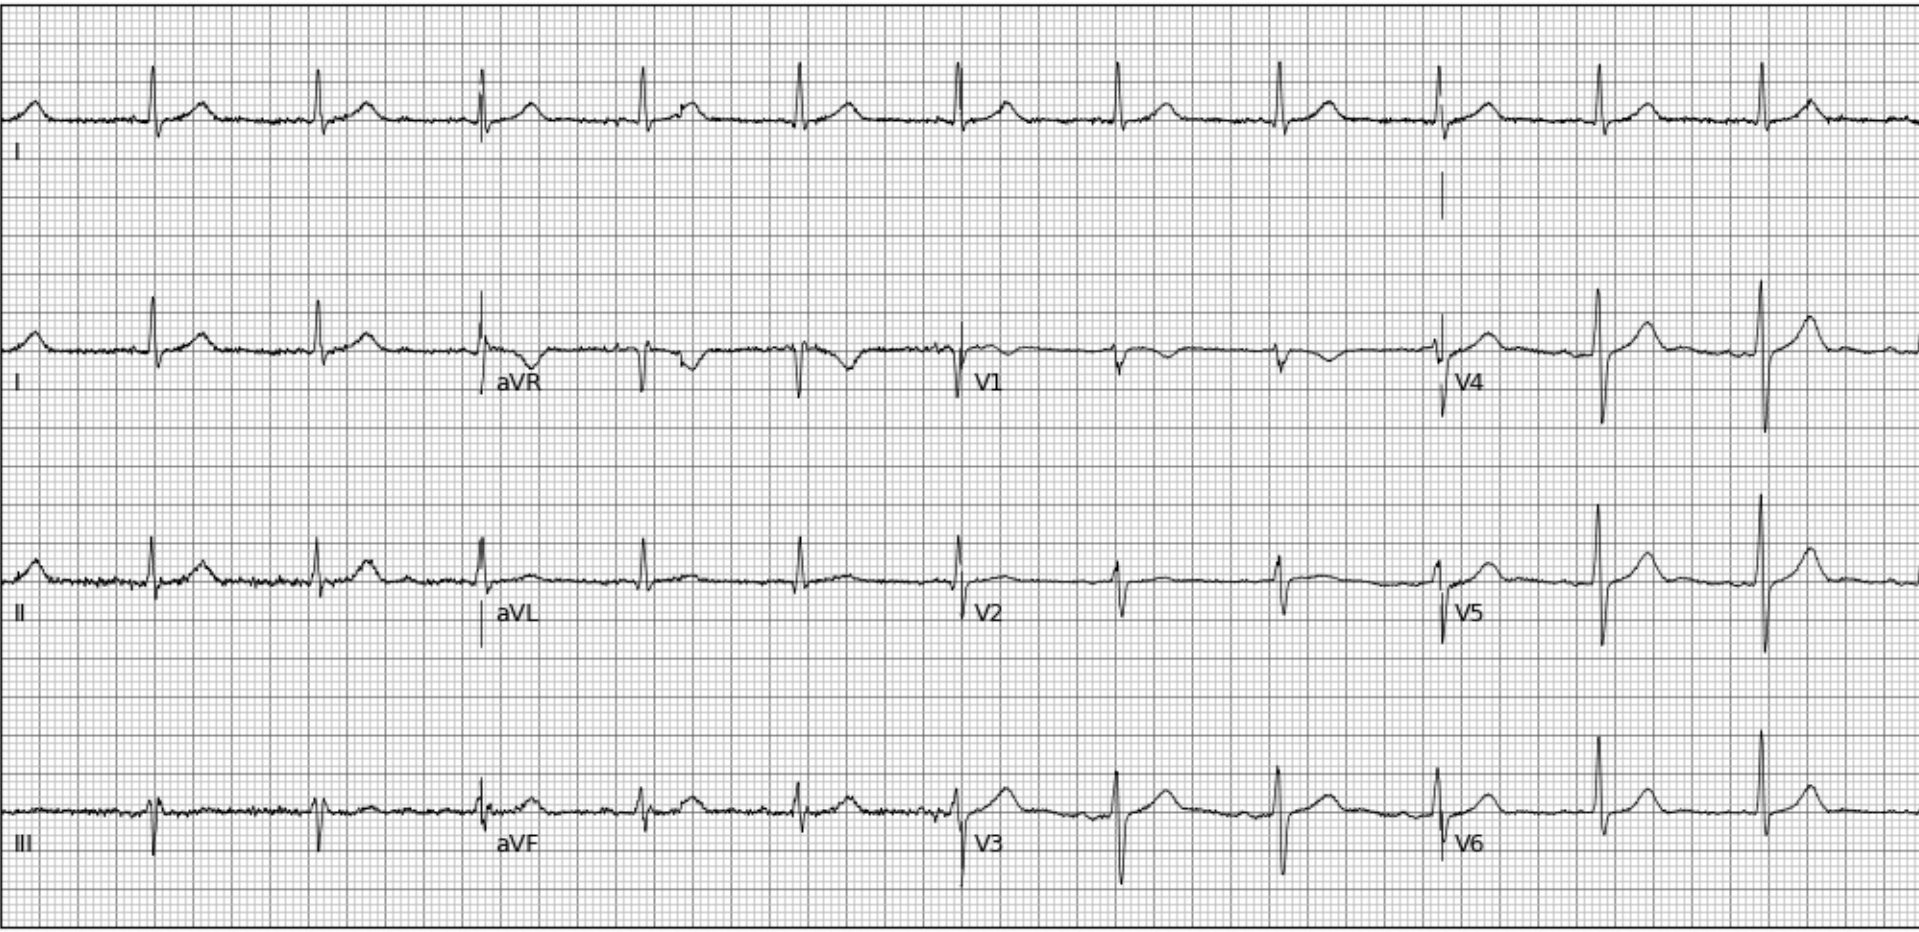

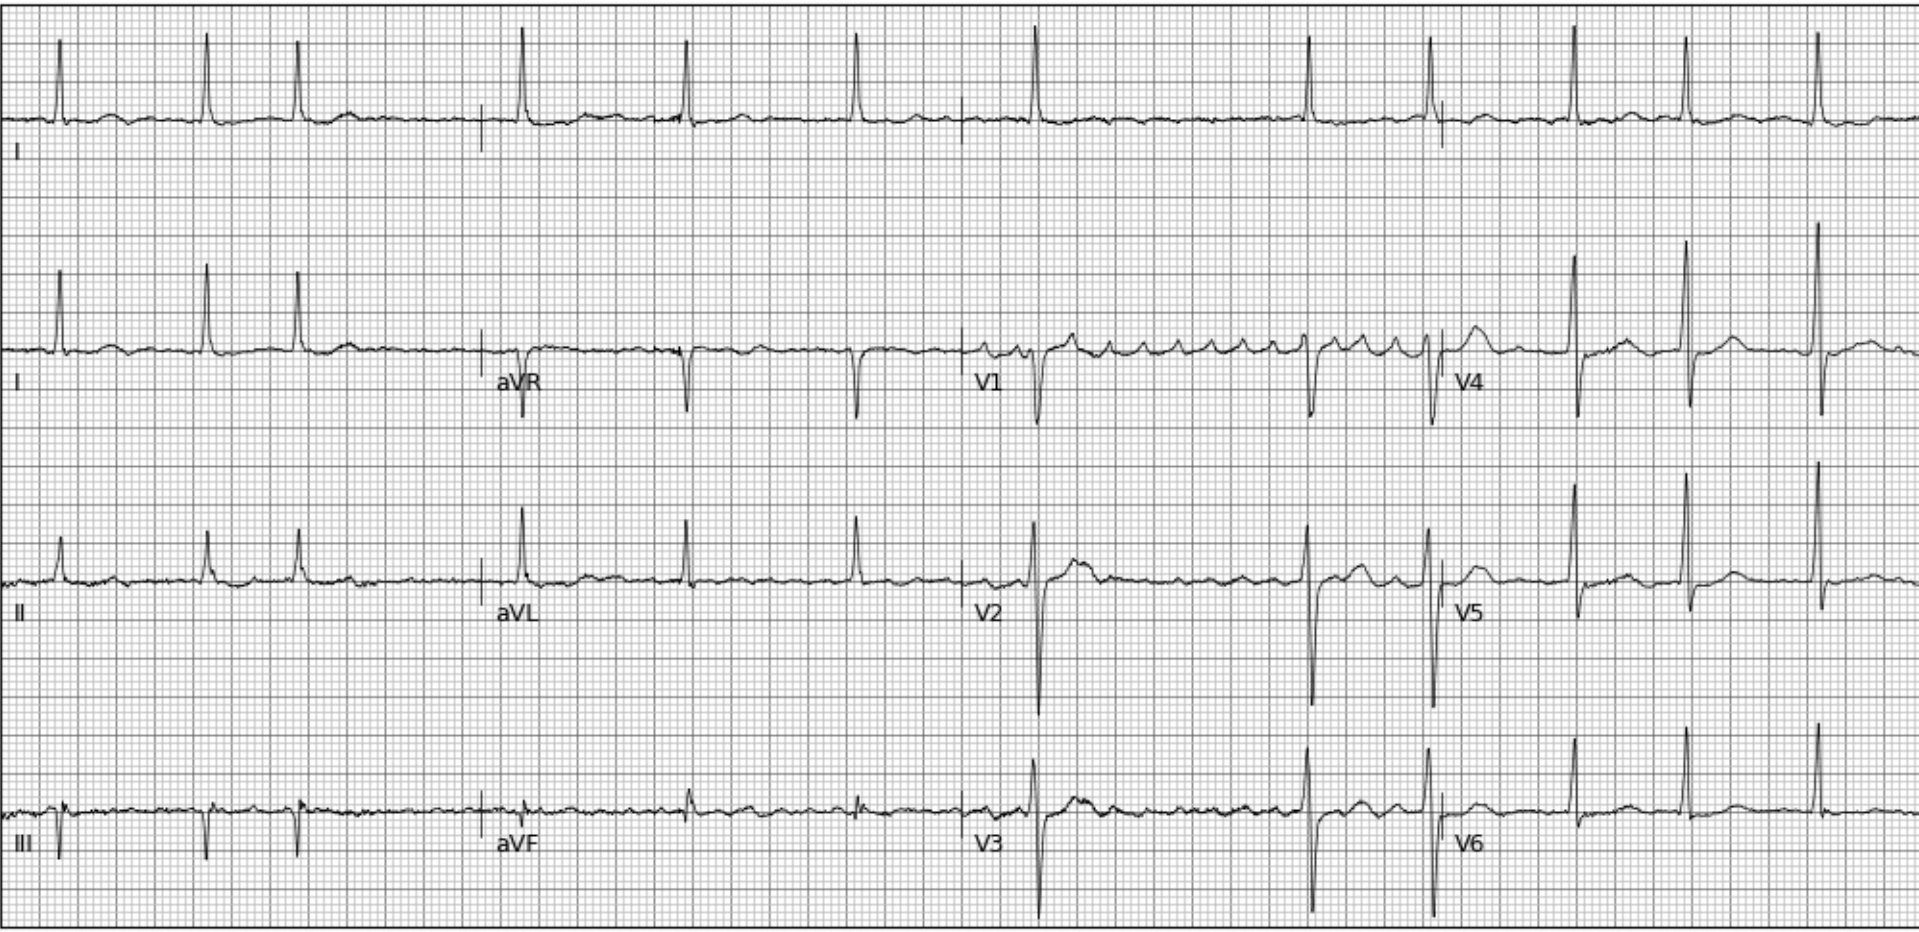



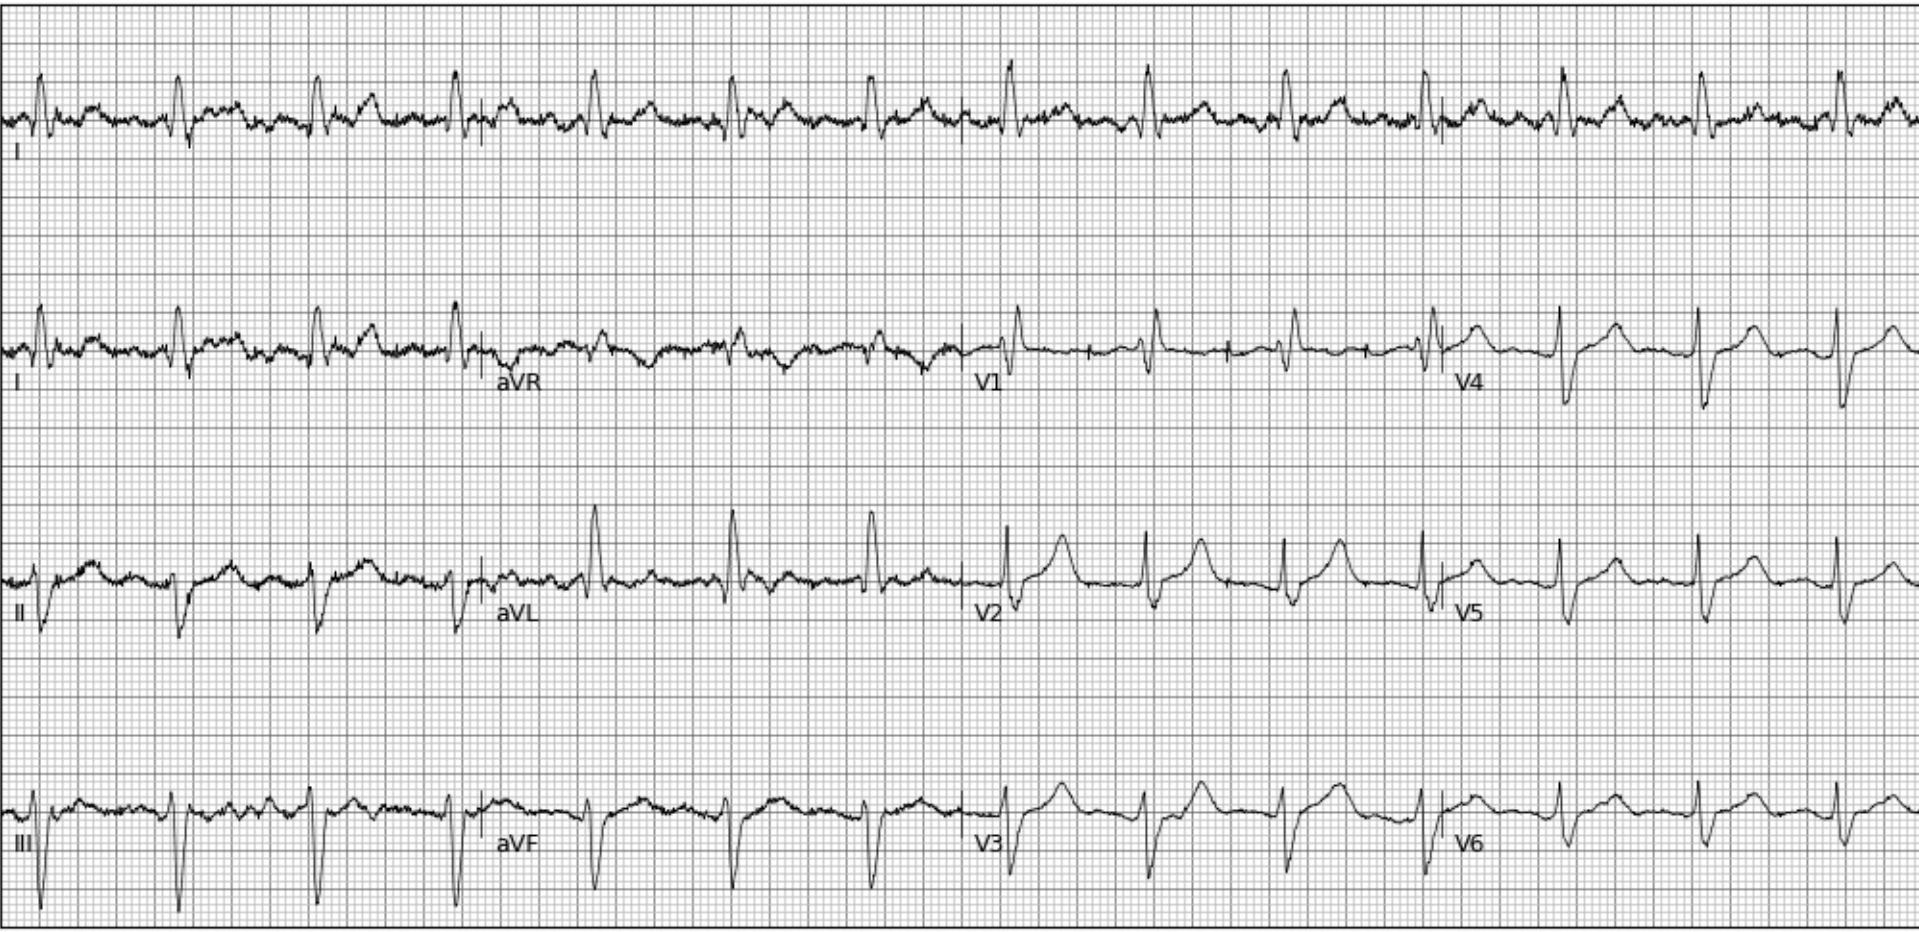

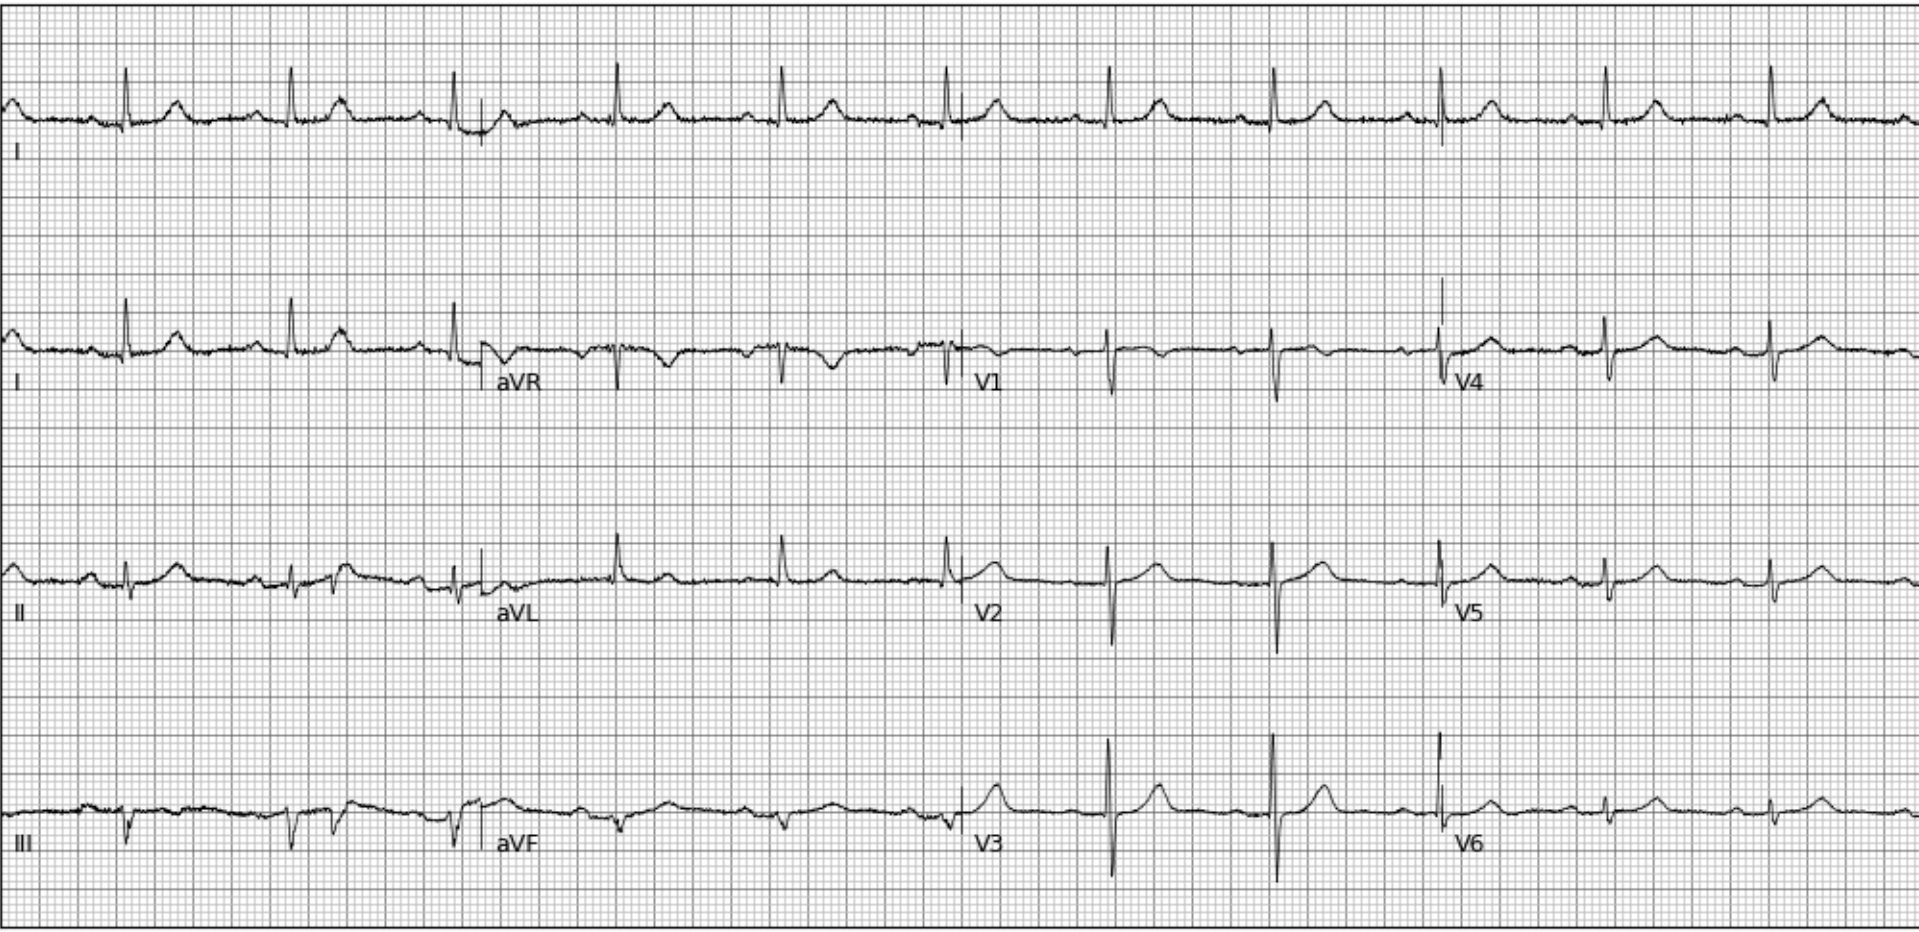

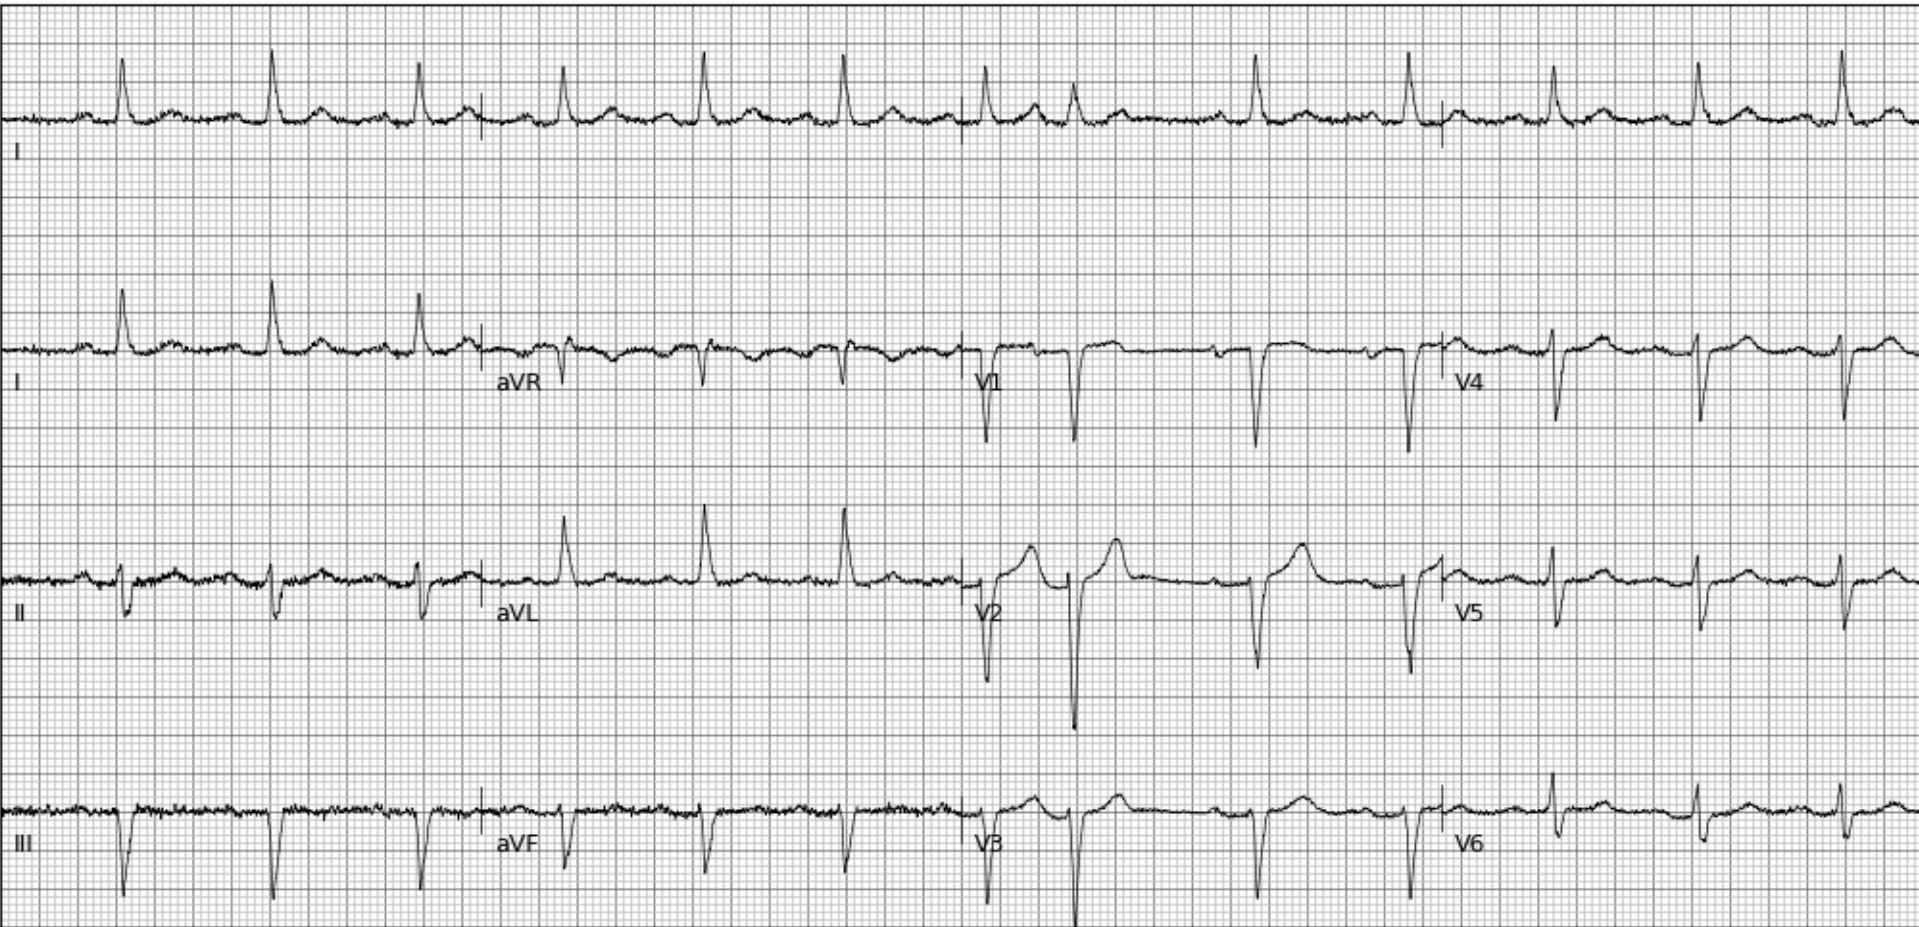



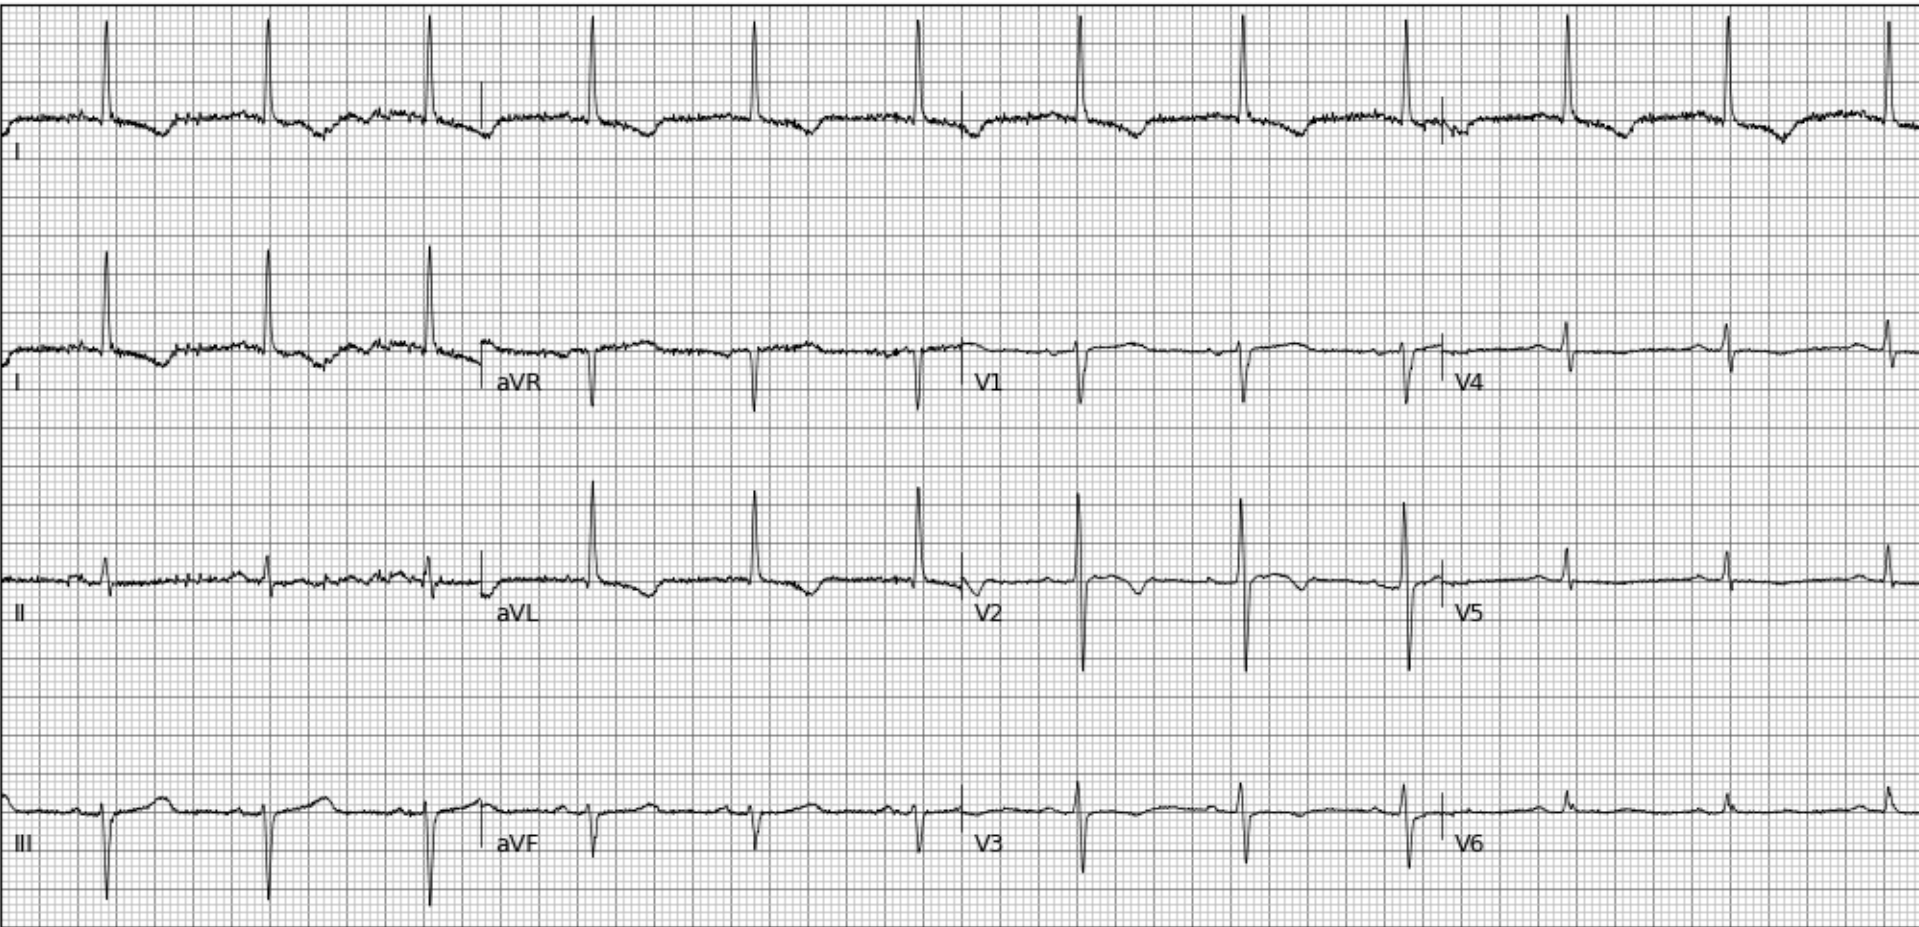

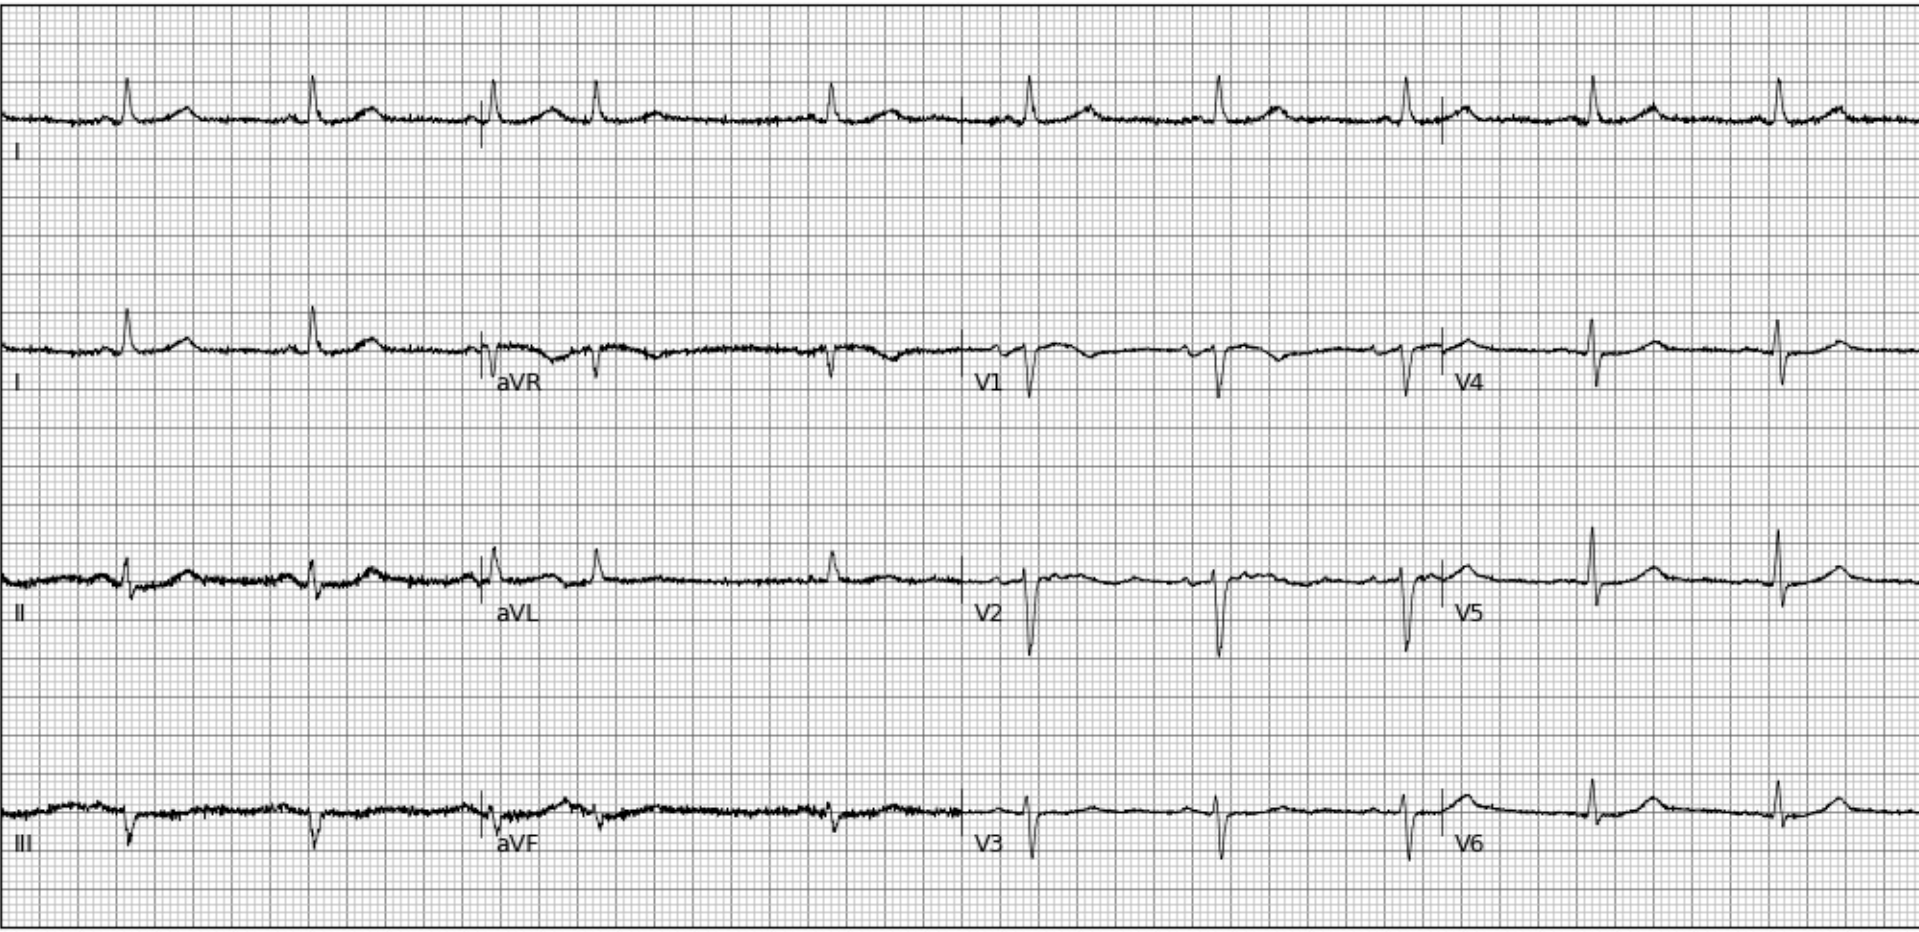

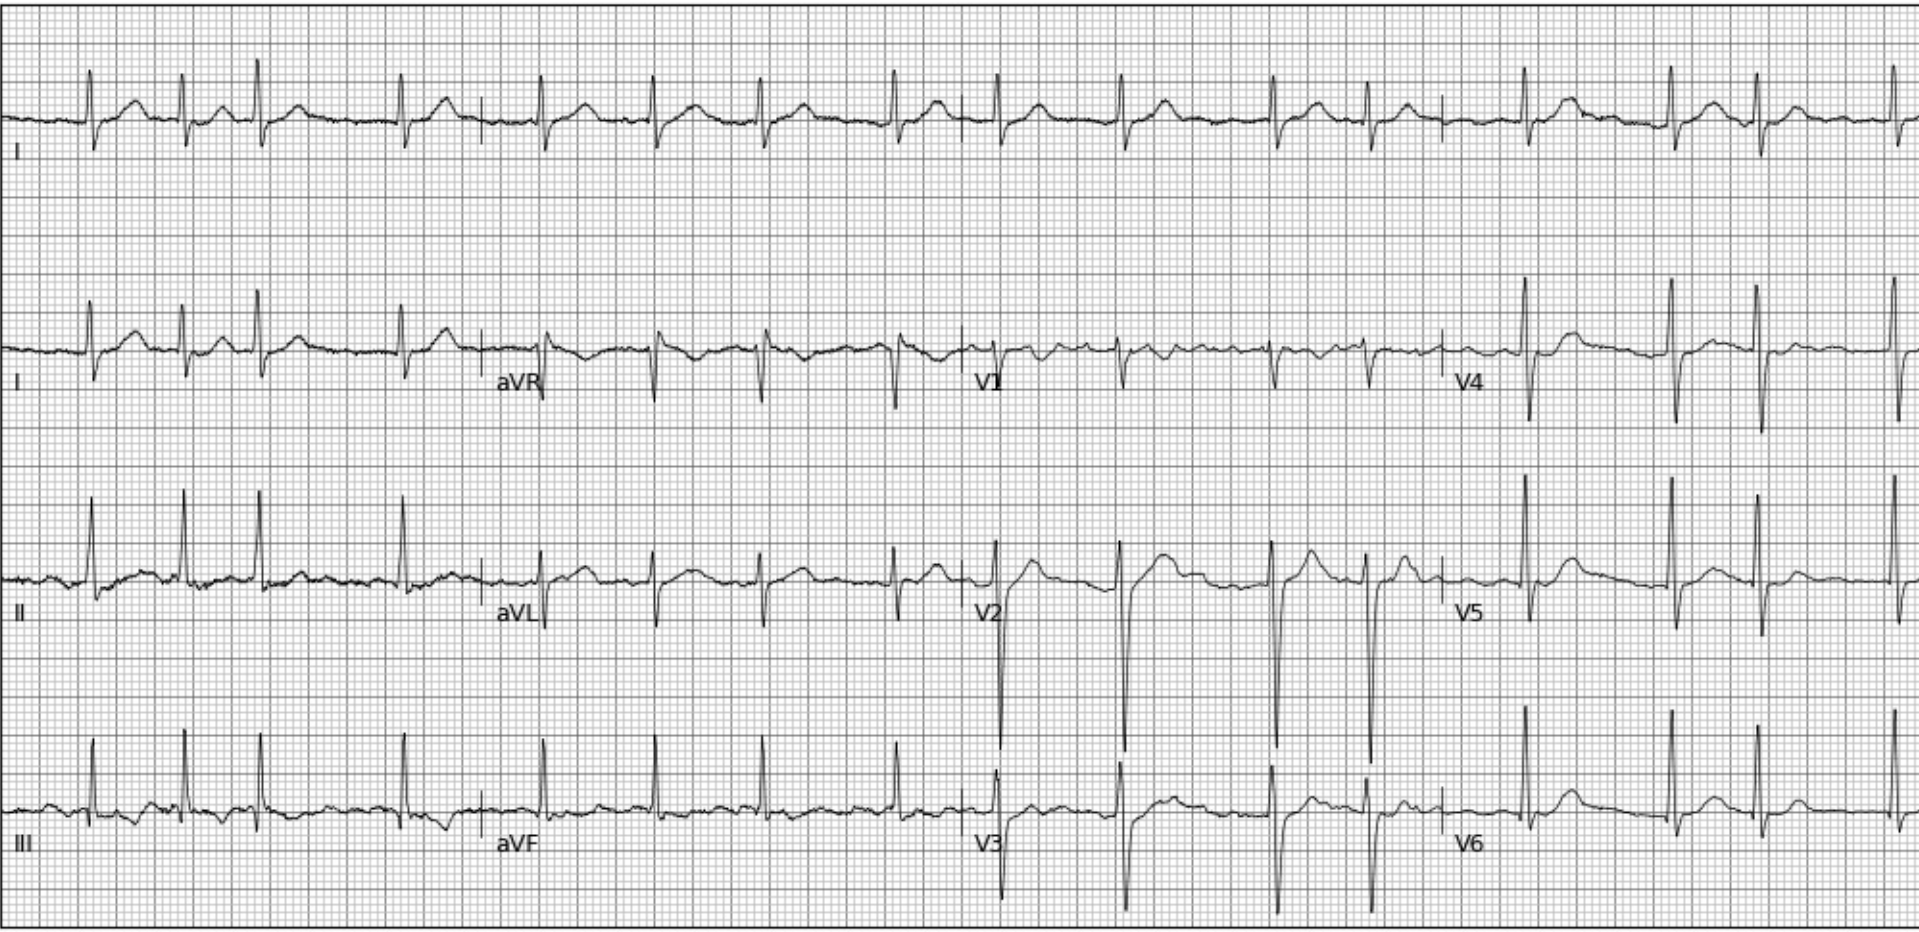



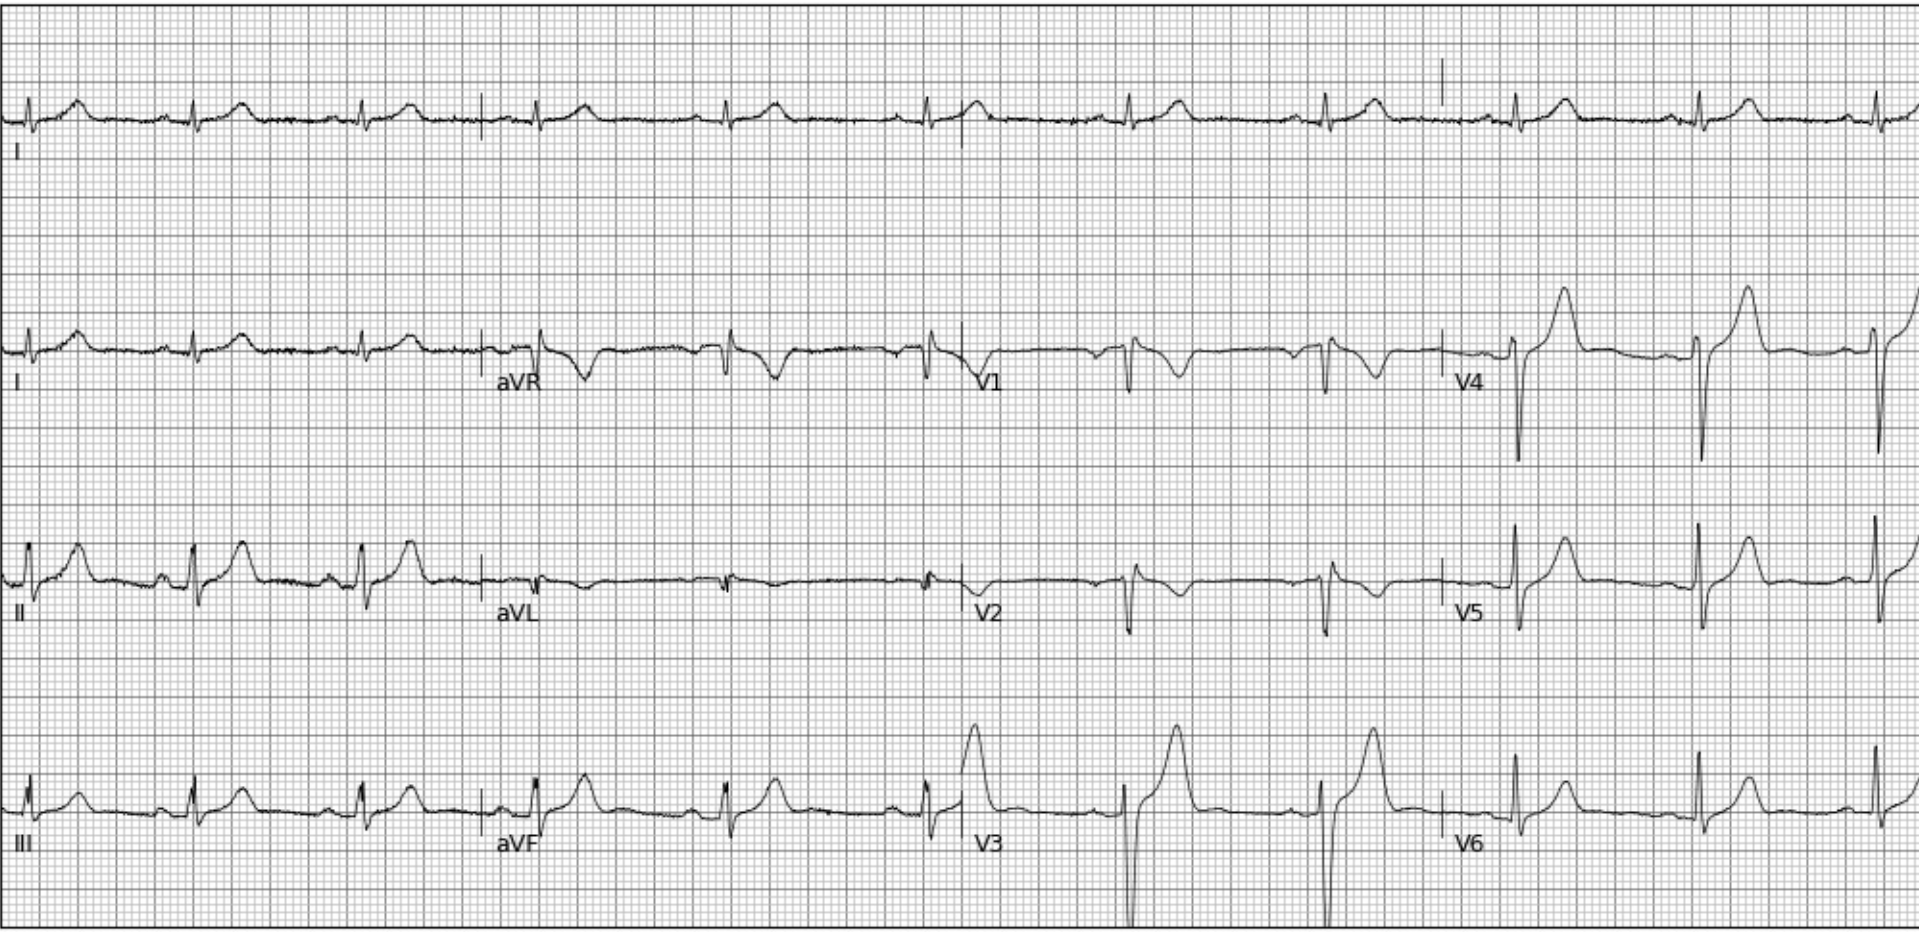

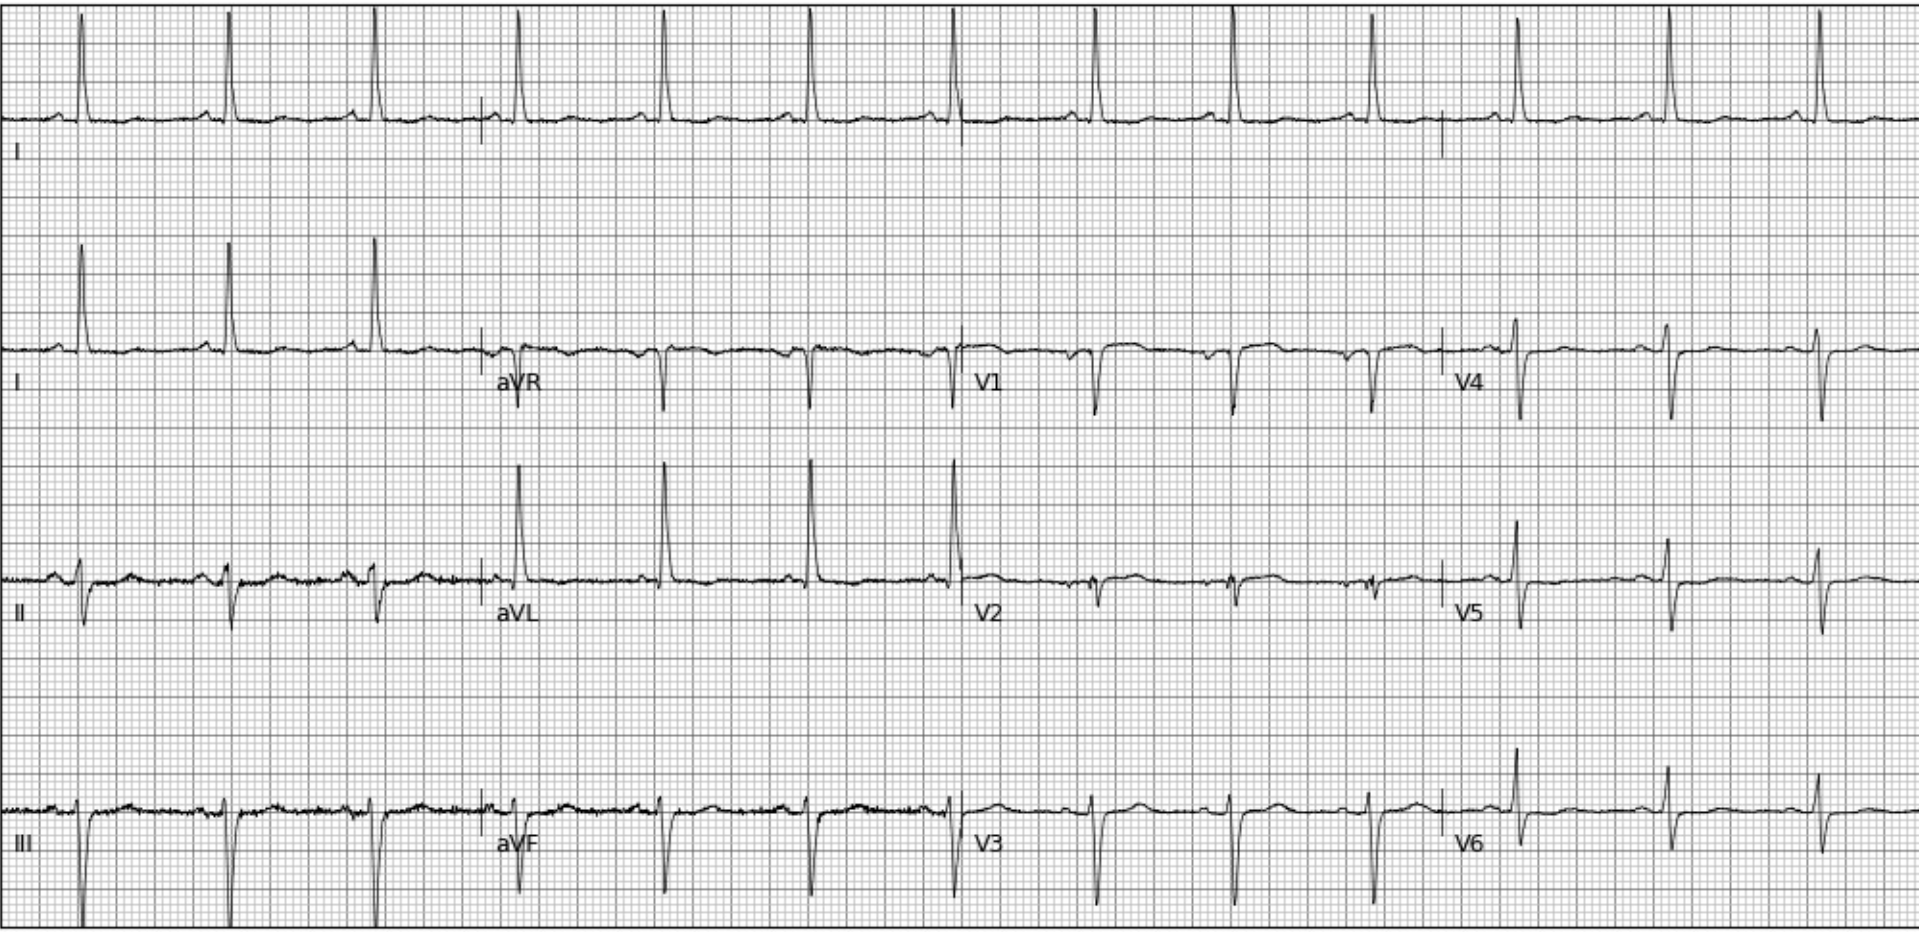

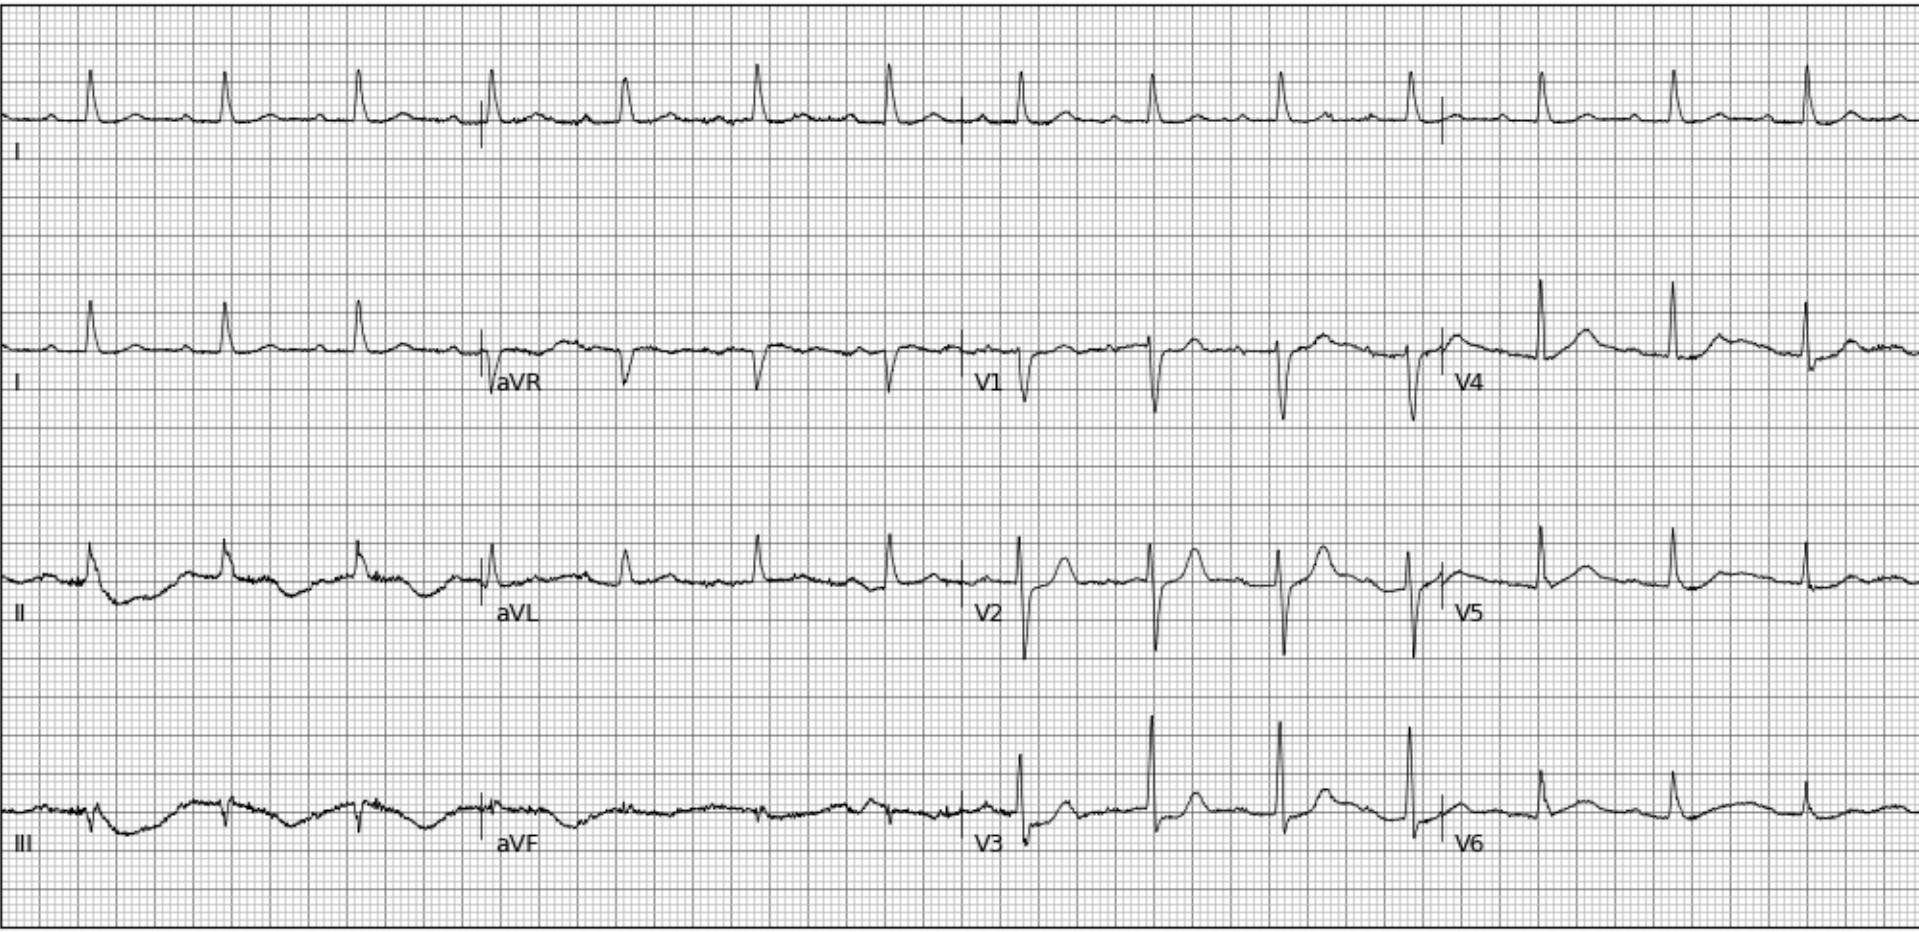



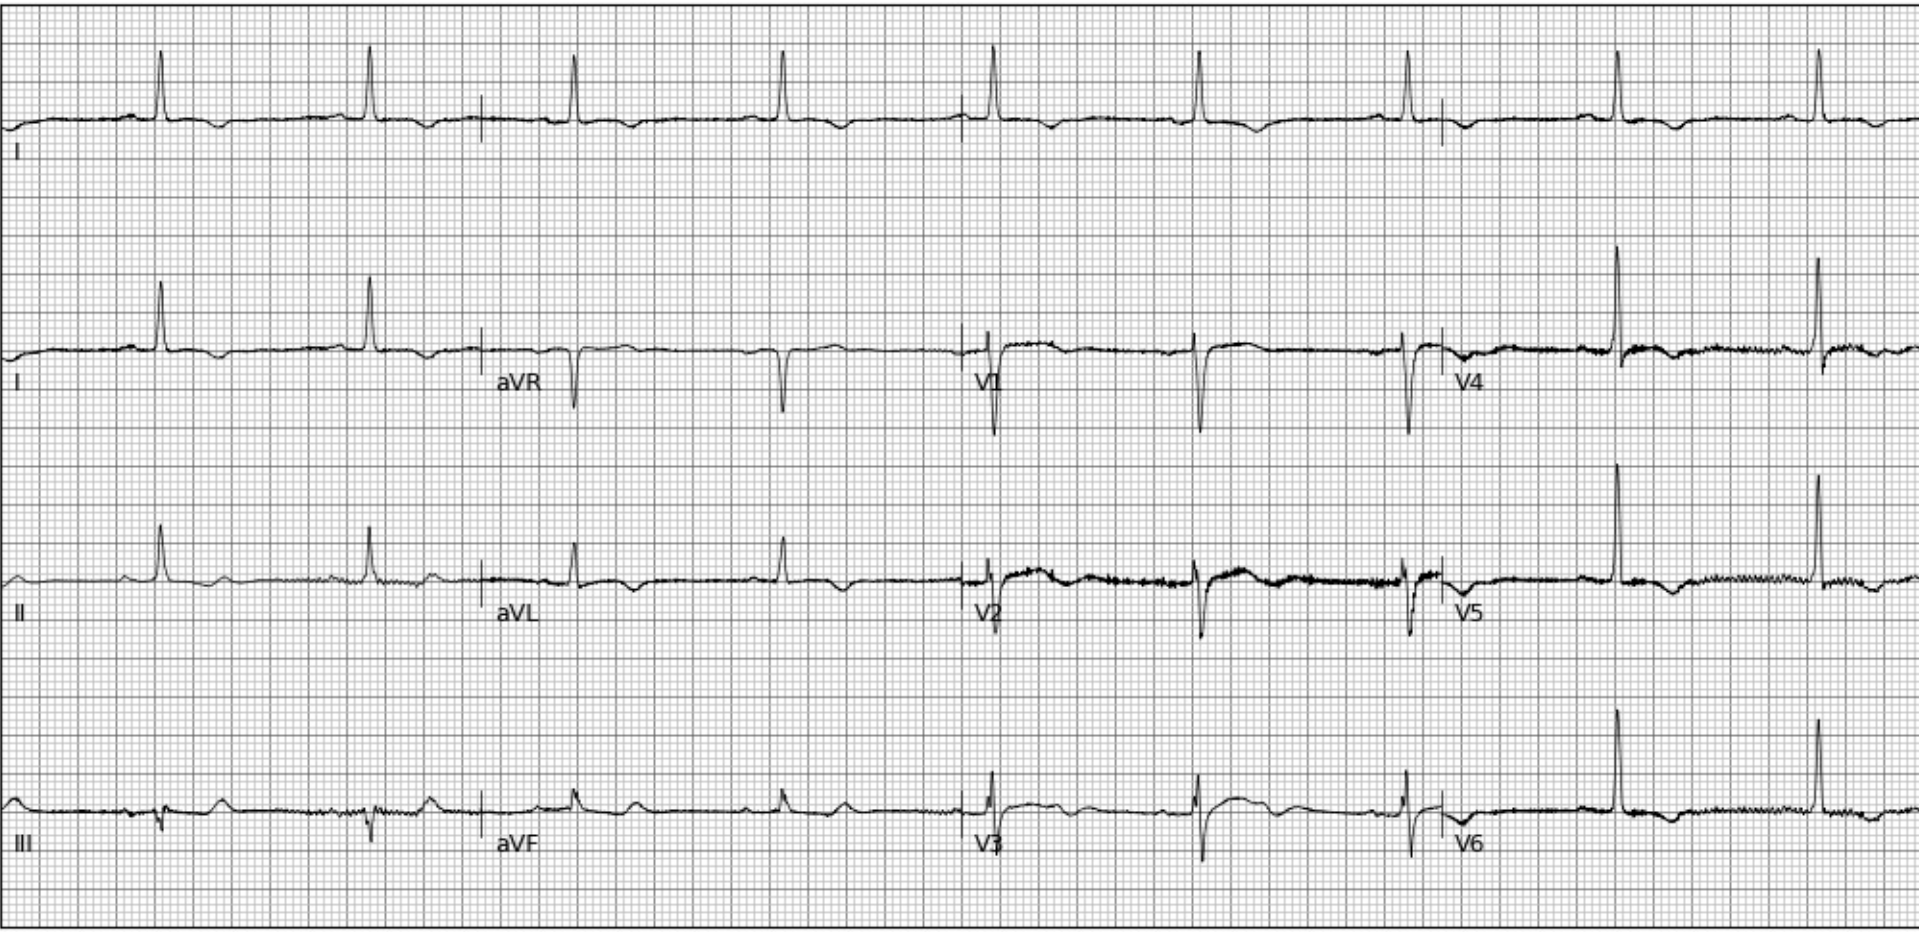

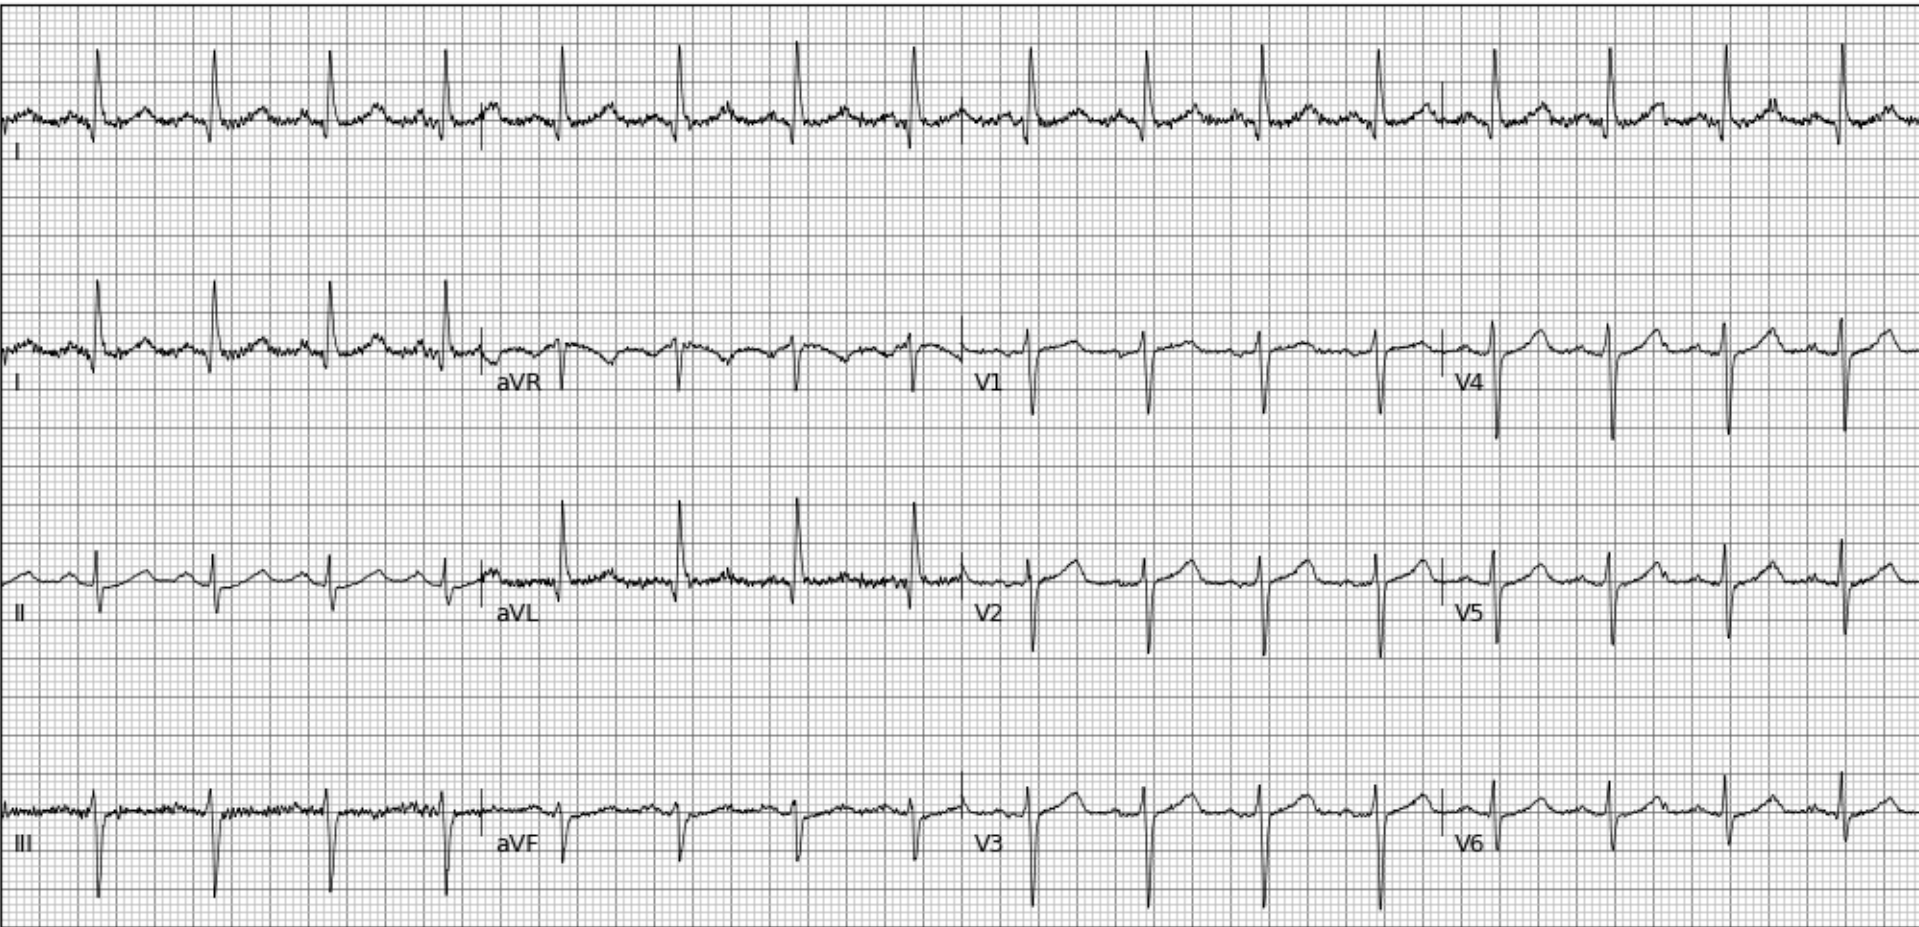

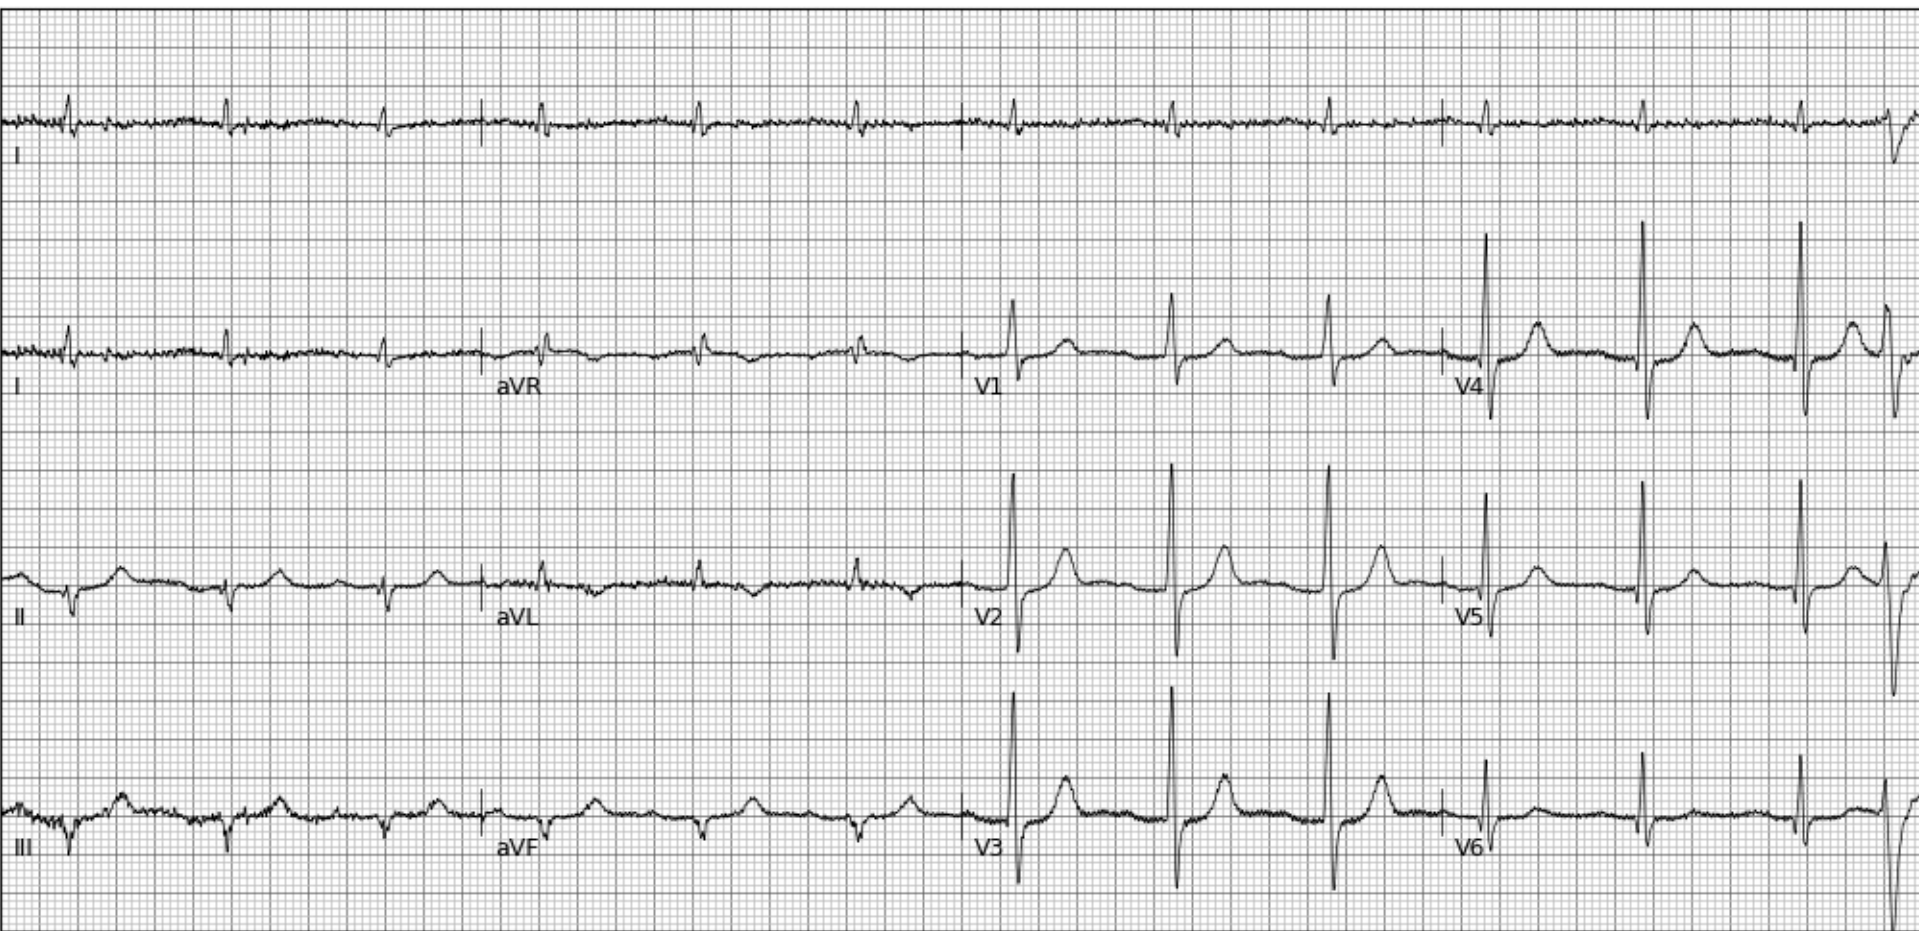



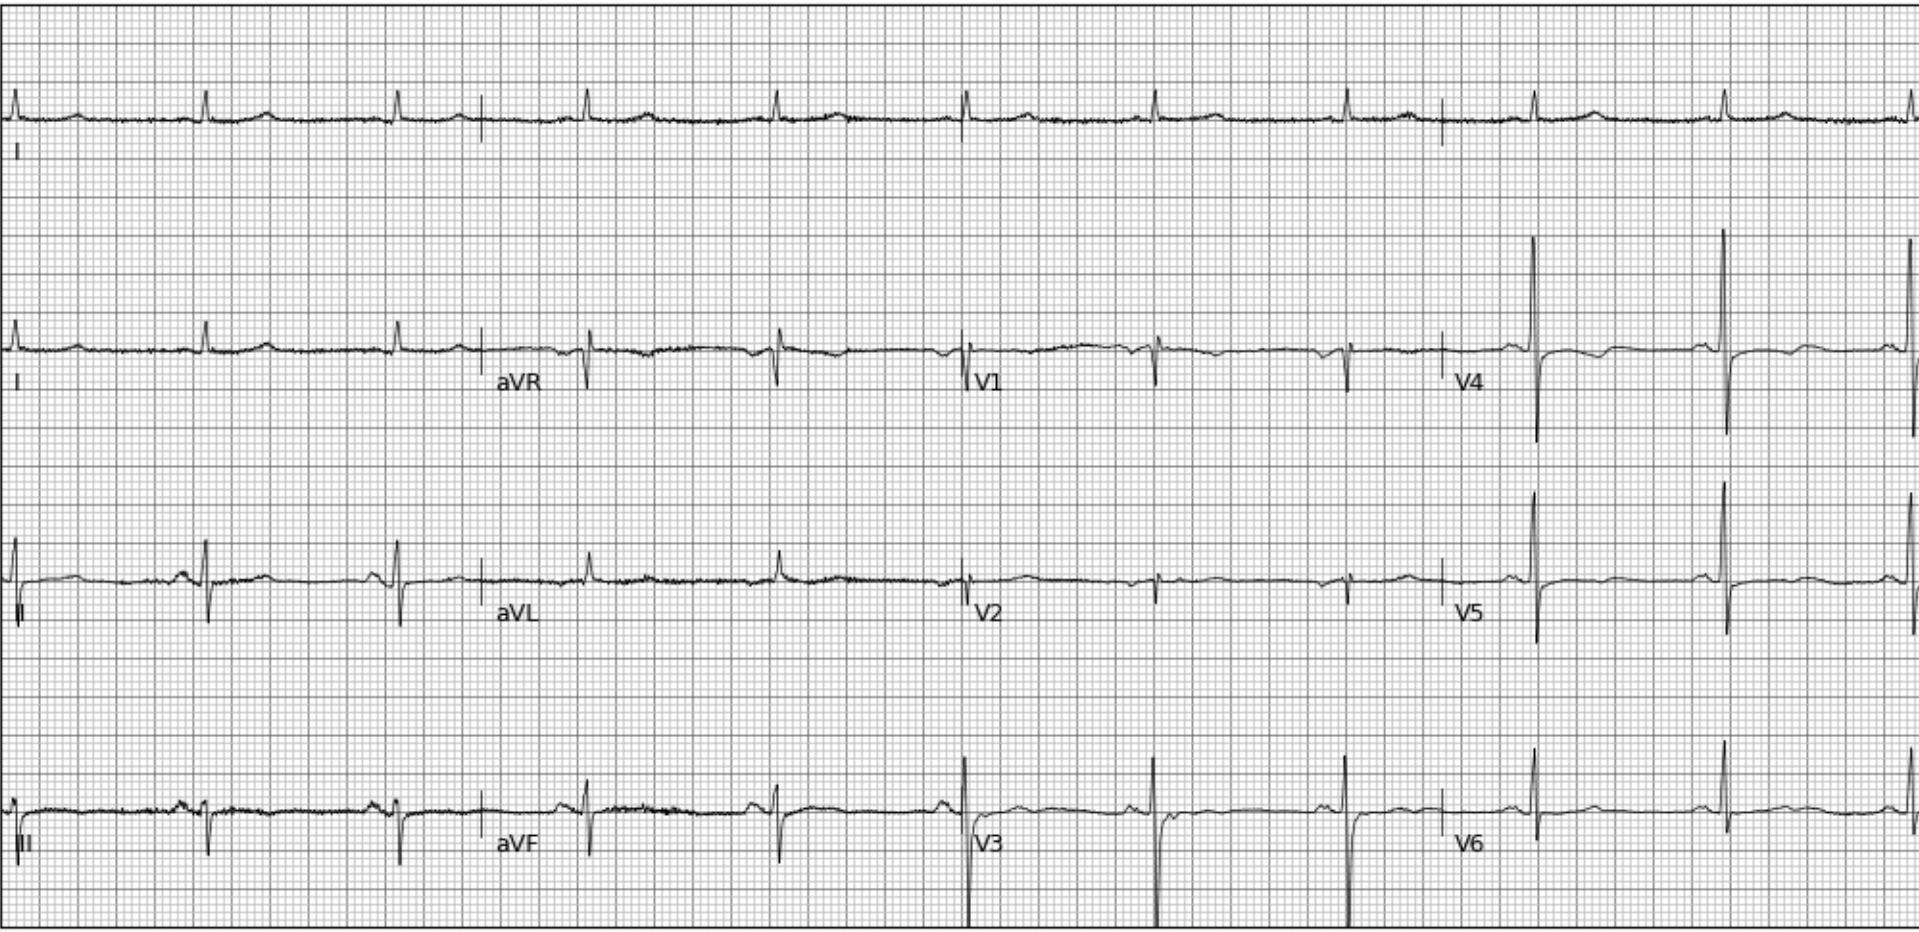

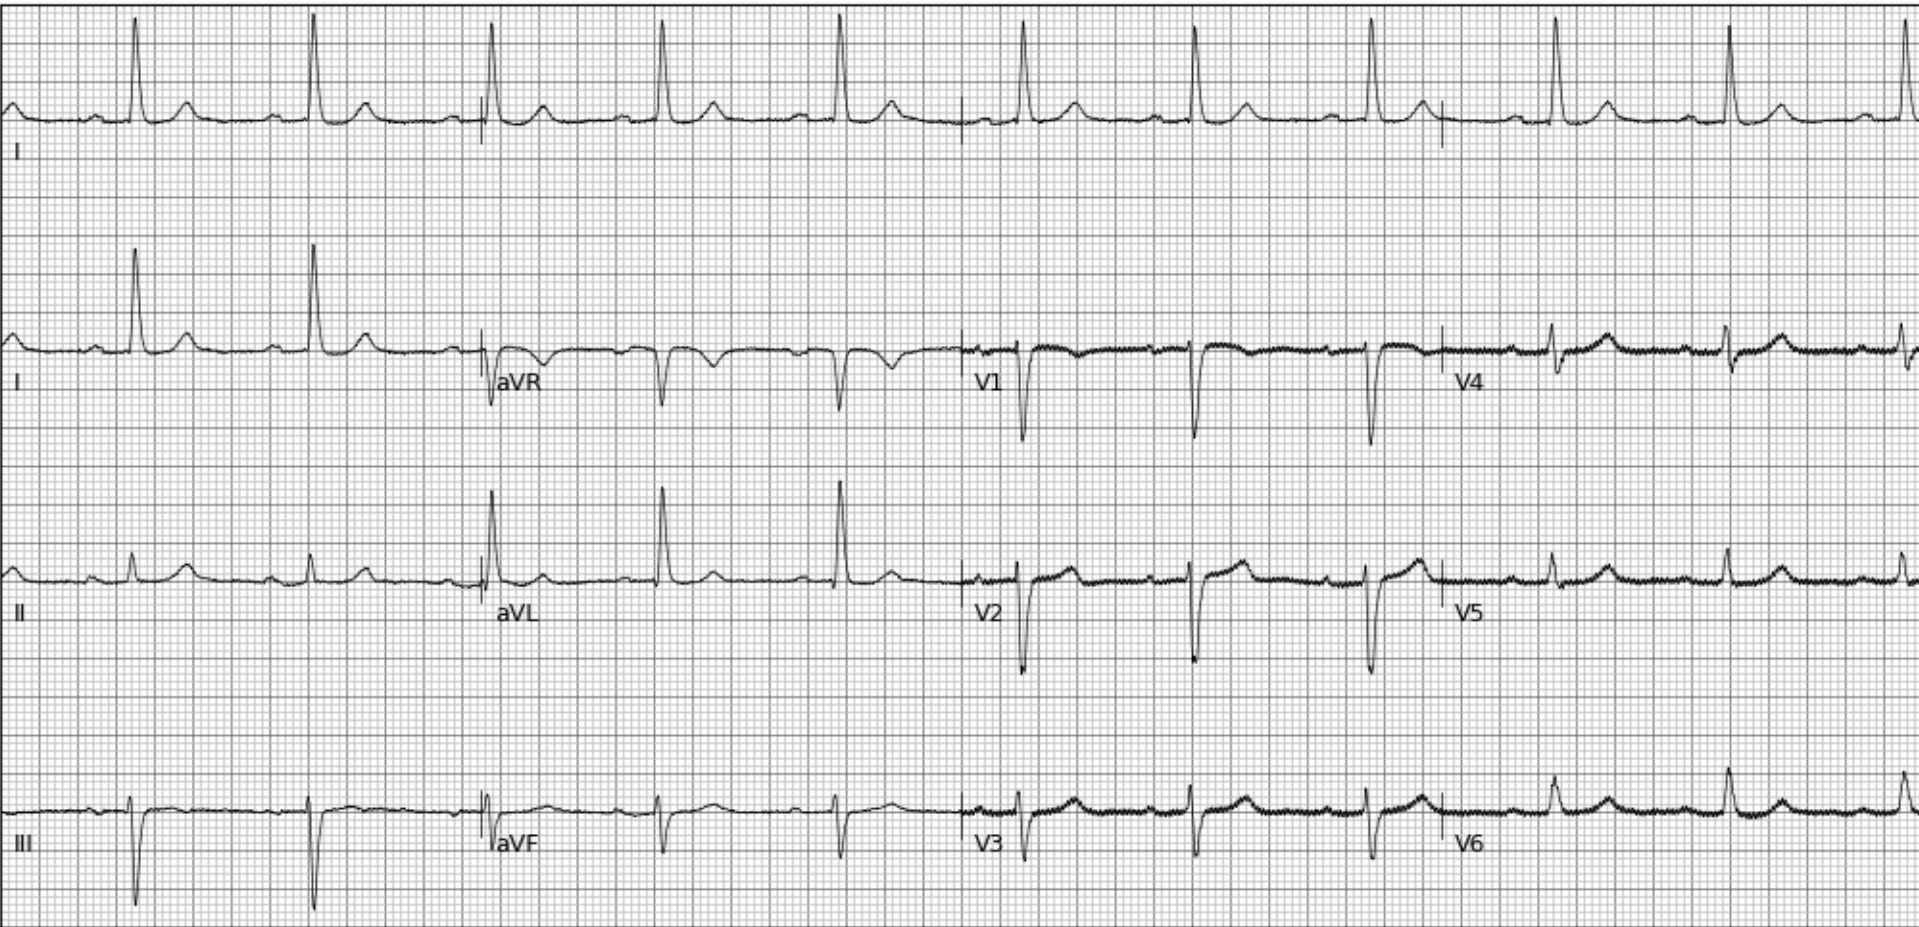

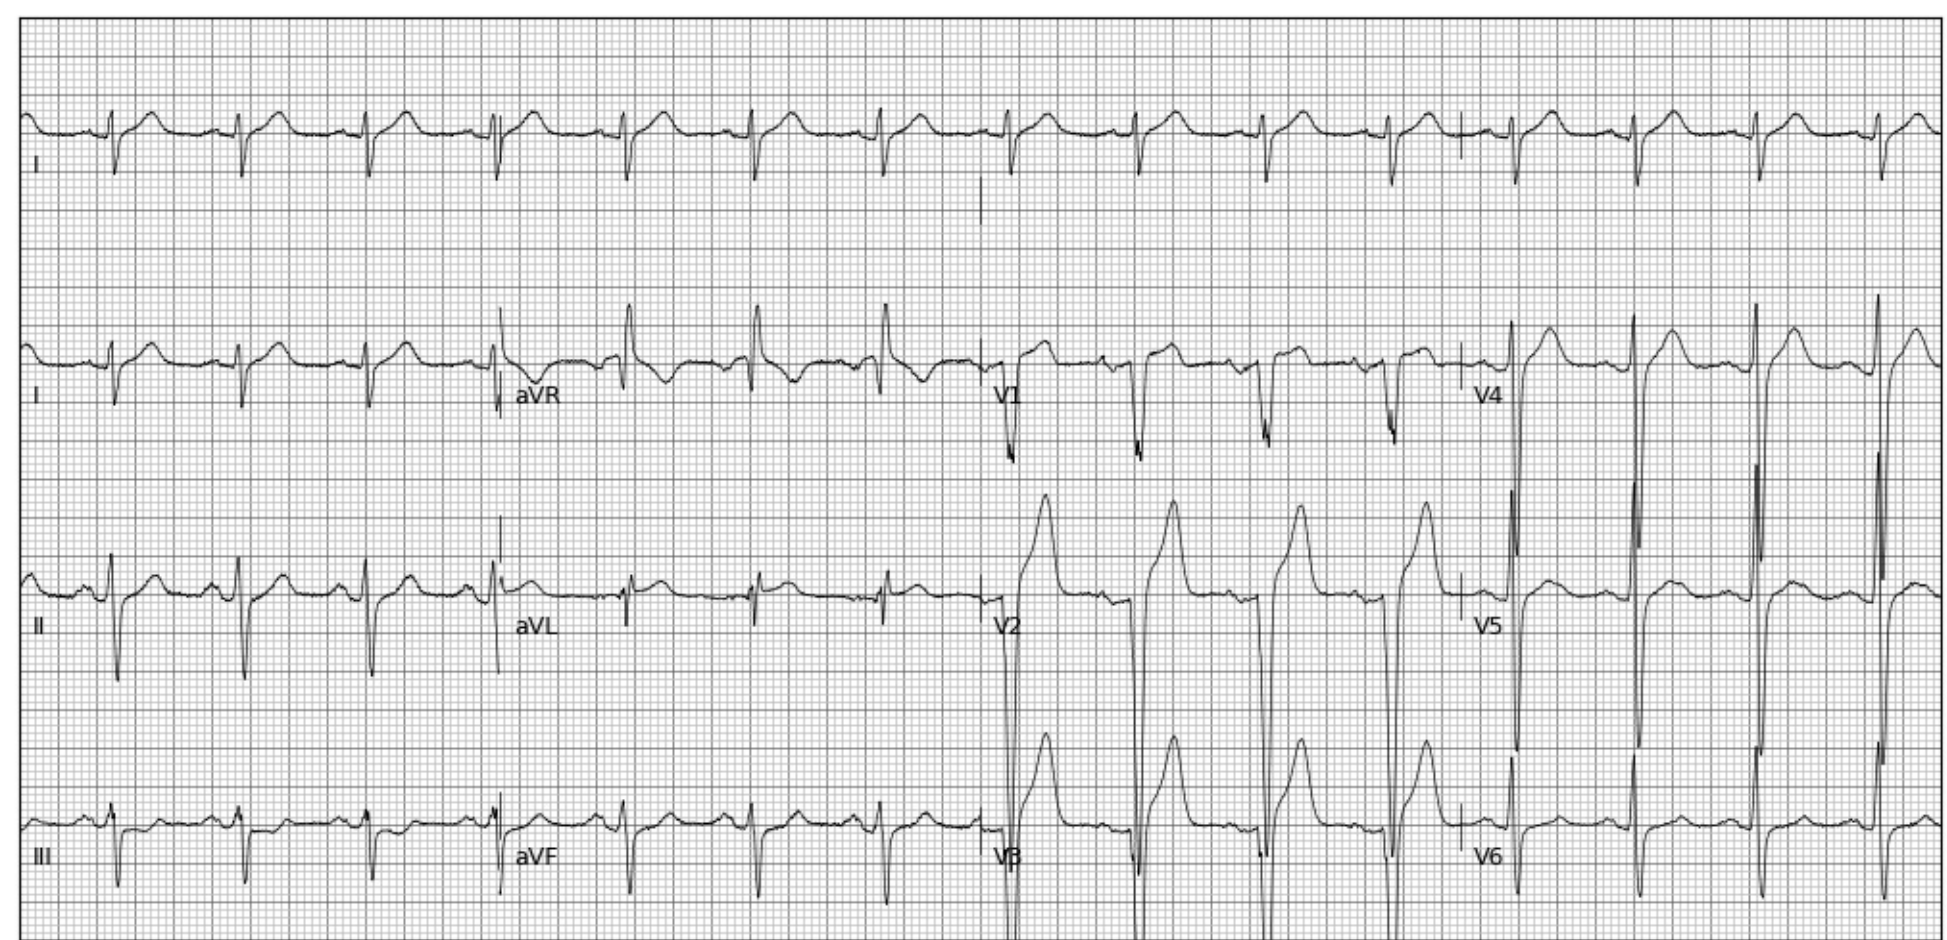



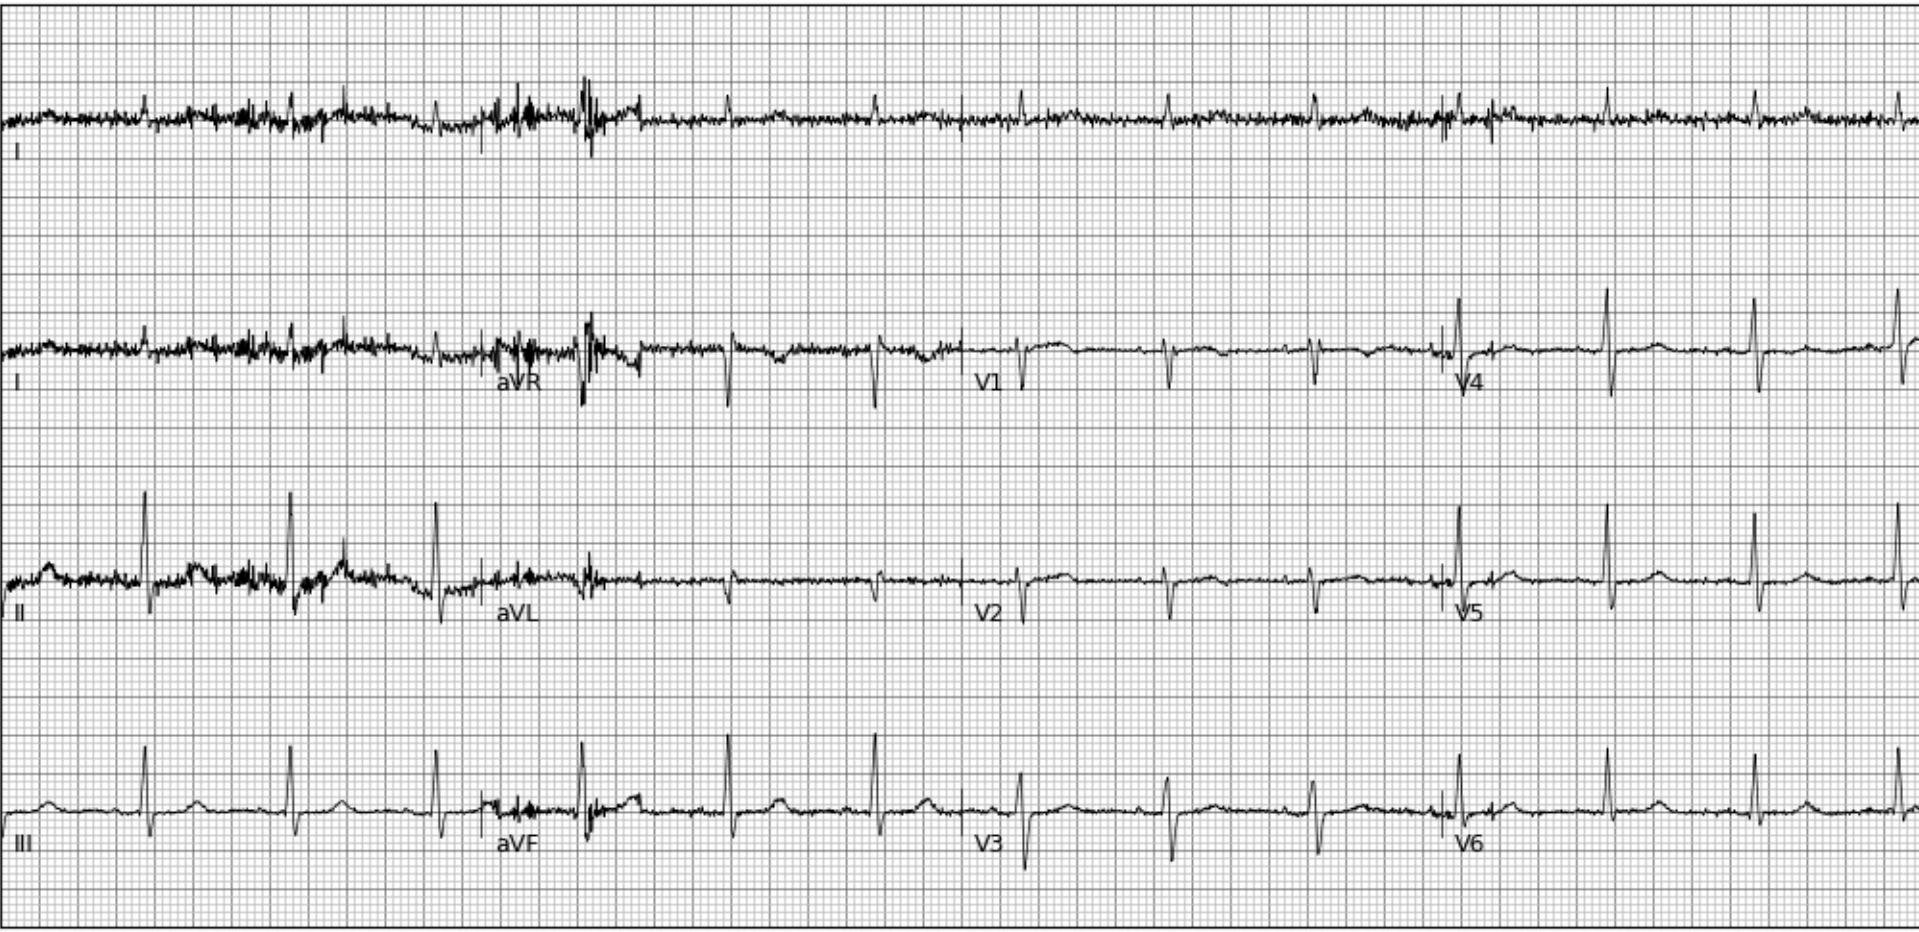

**Section 3. Random examples of 25 electrocardiogram images plotted in novel format (Blue-on-Red Rhythm-on-top) not encountered during model development**

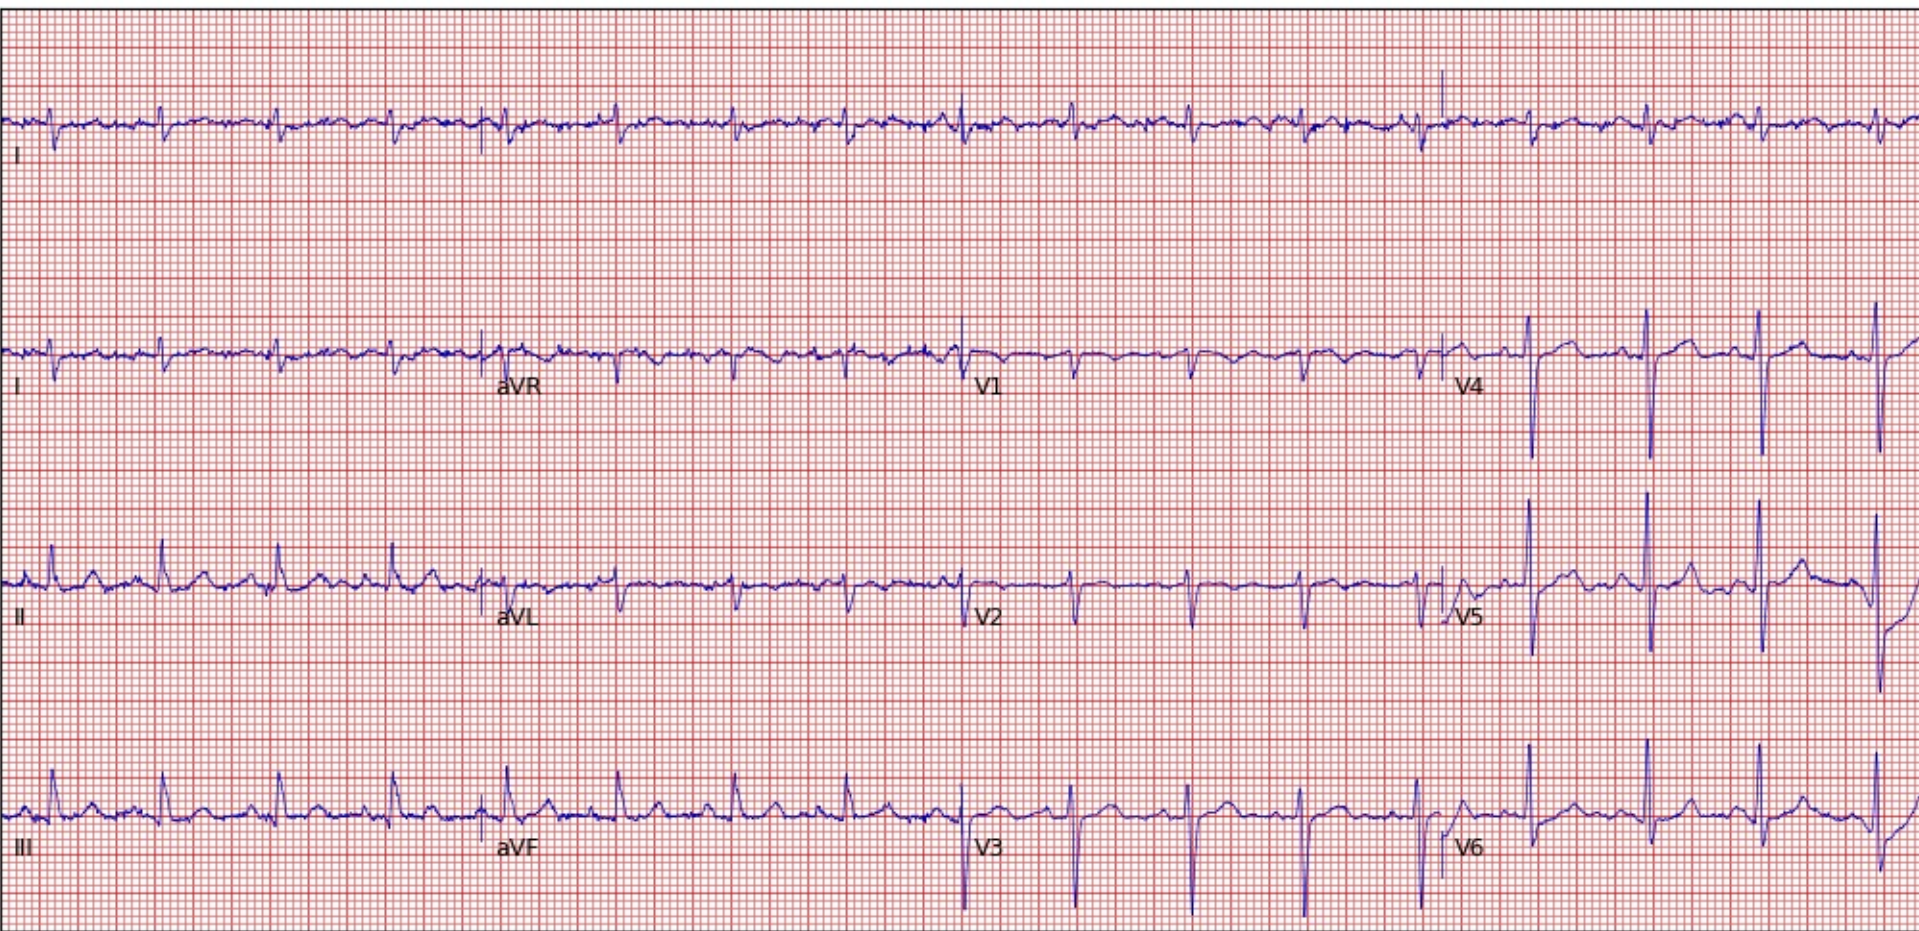



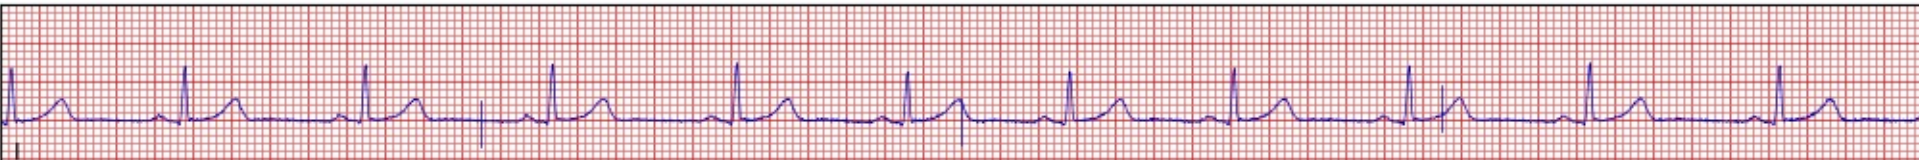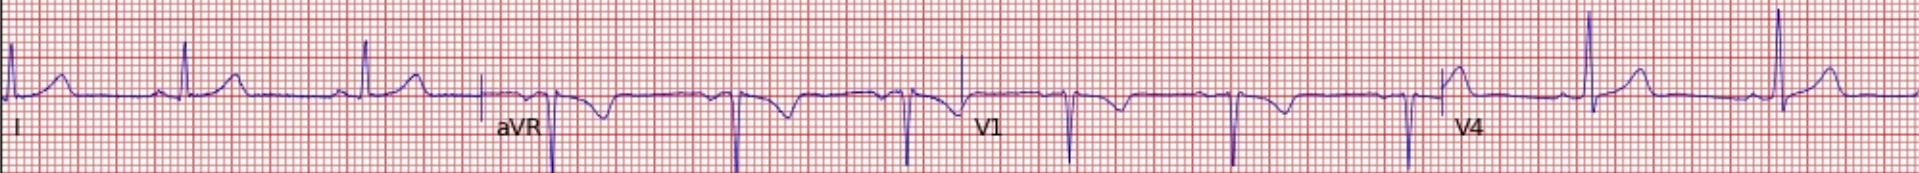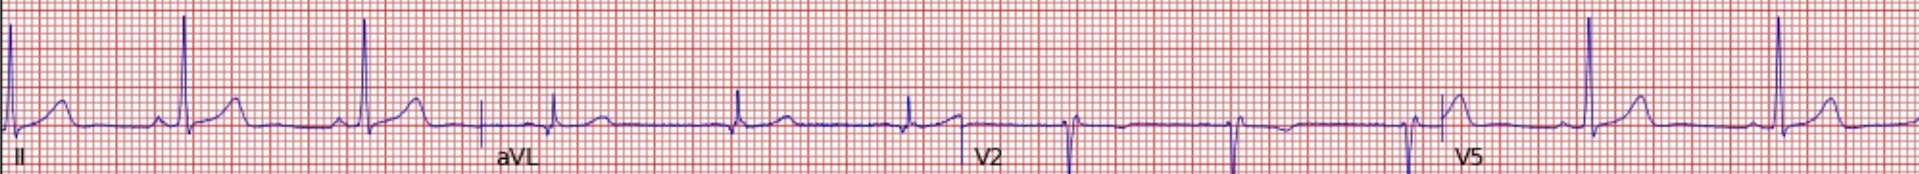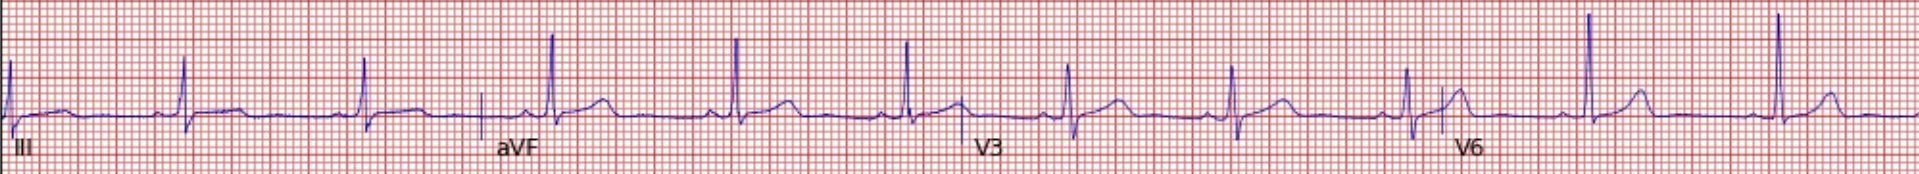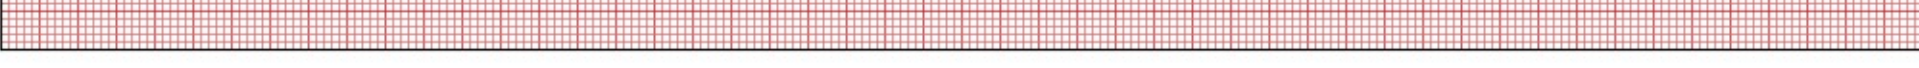



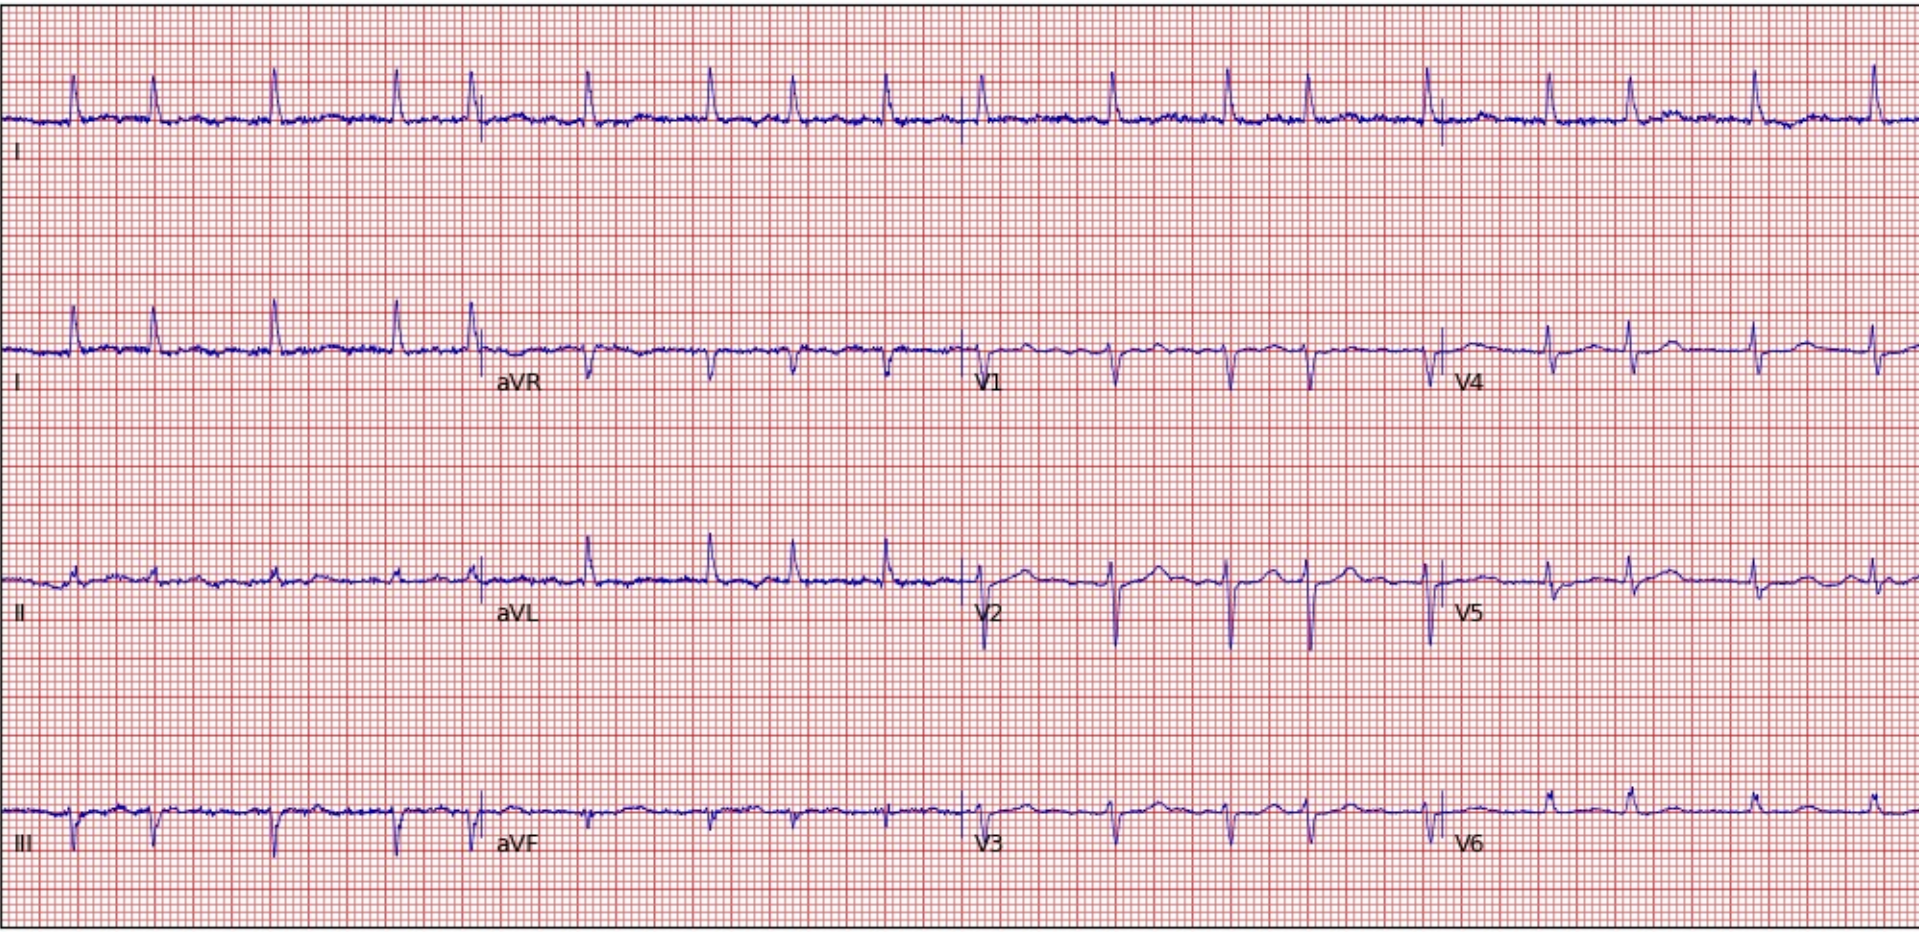



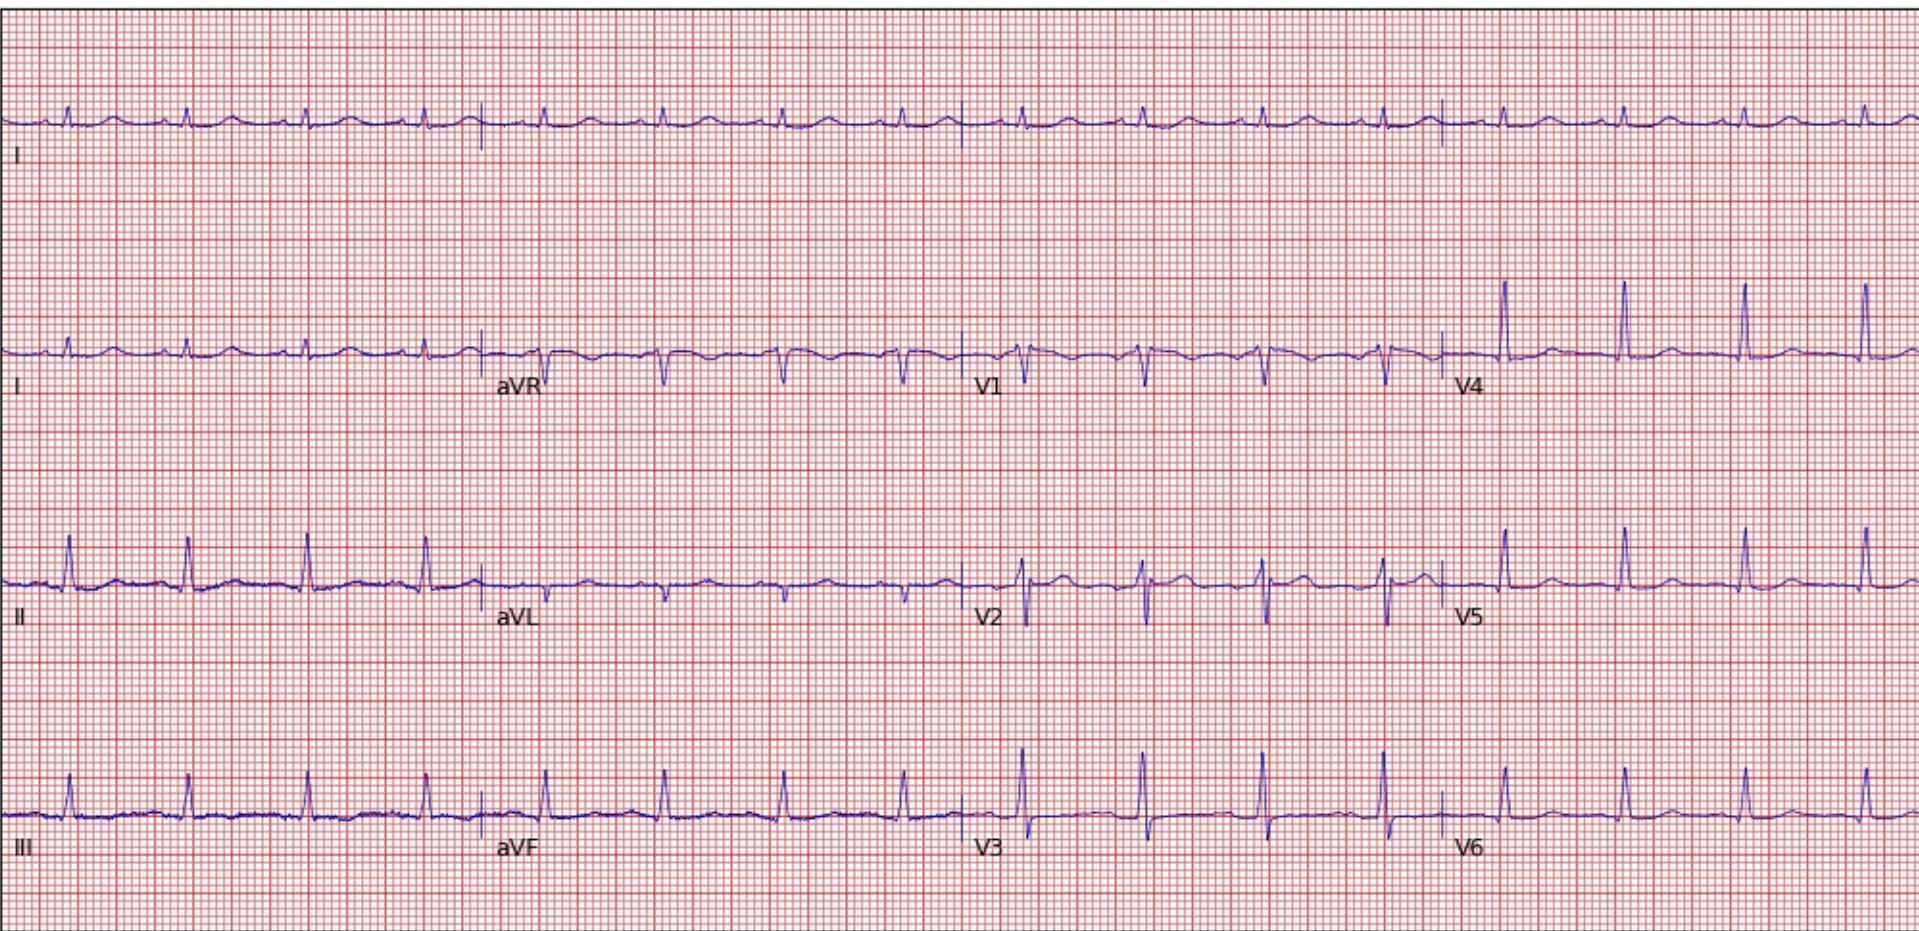



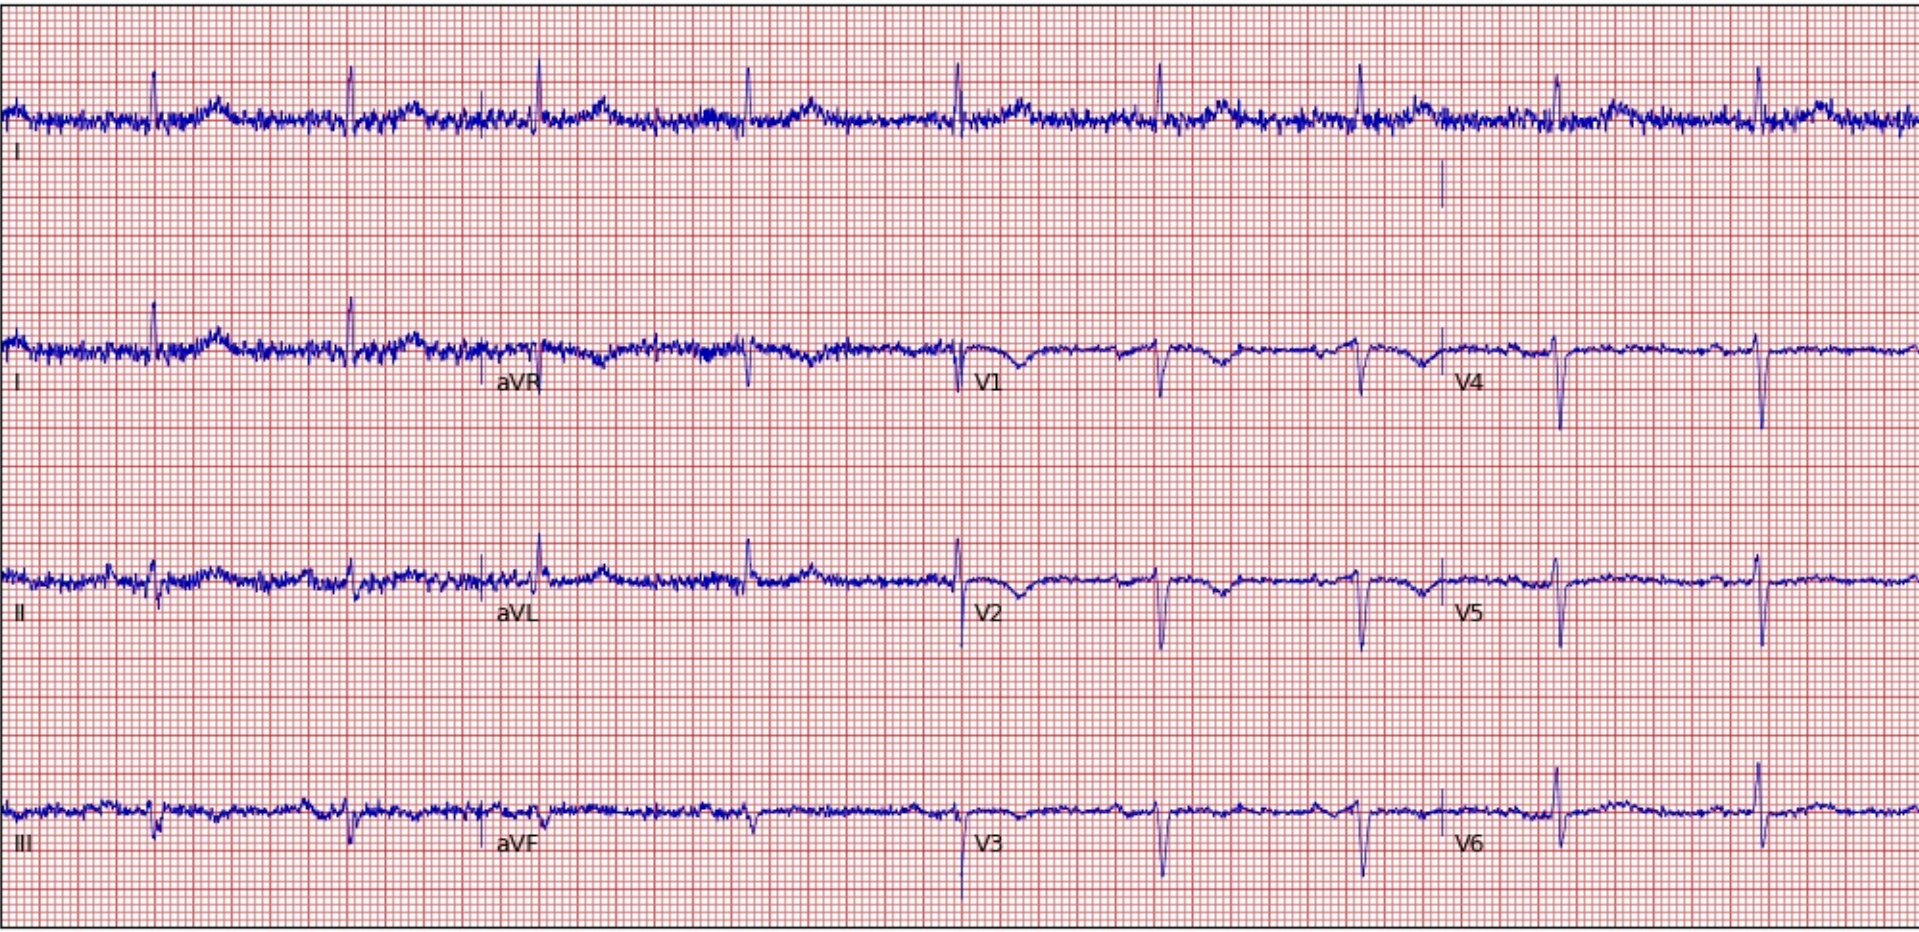



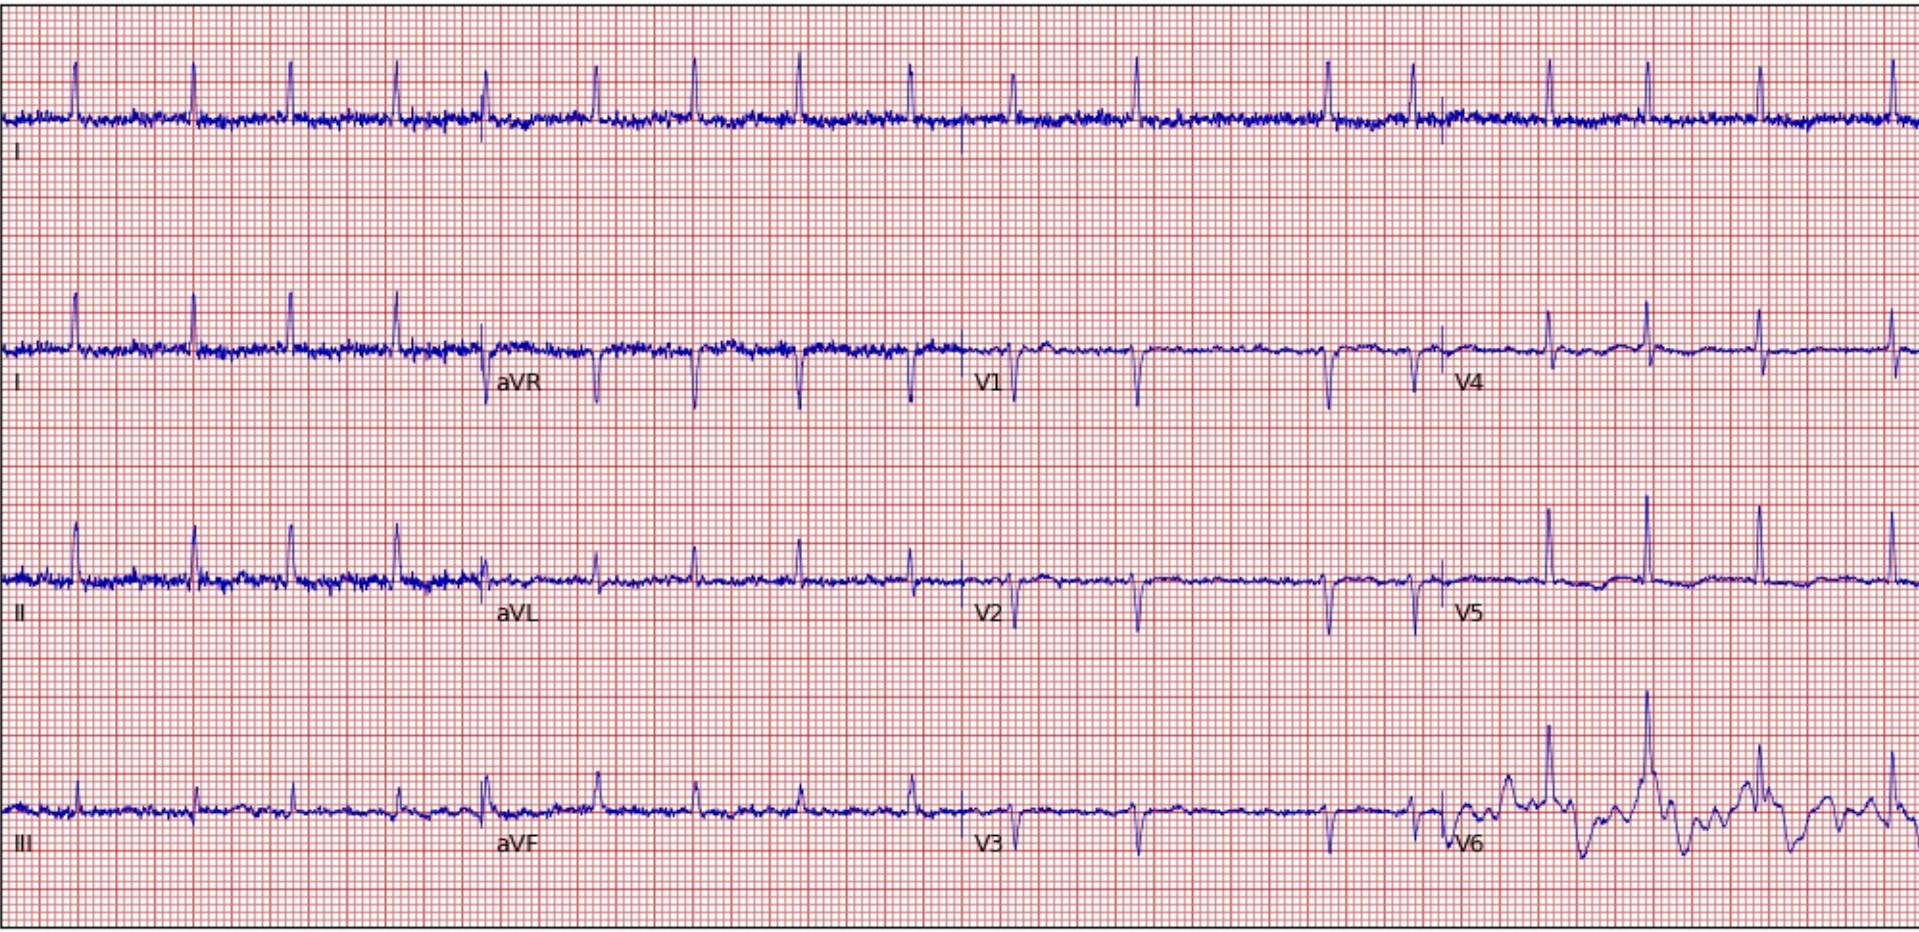



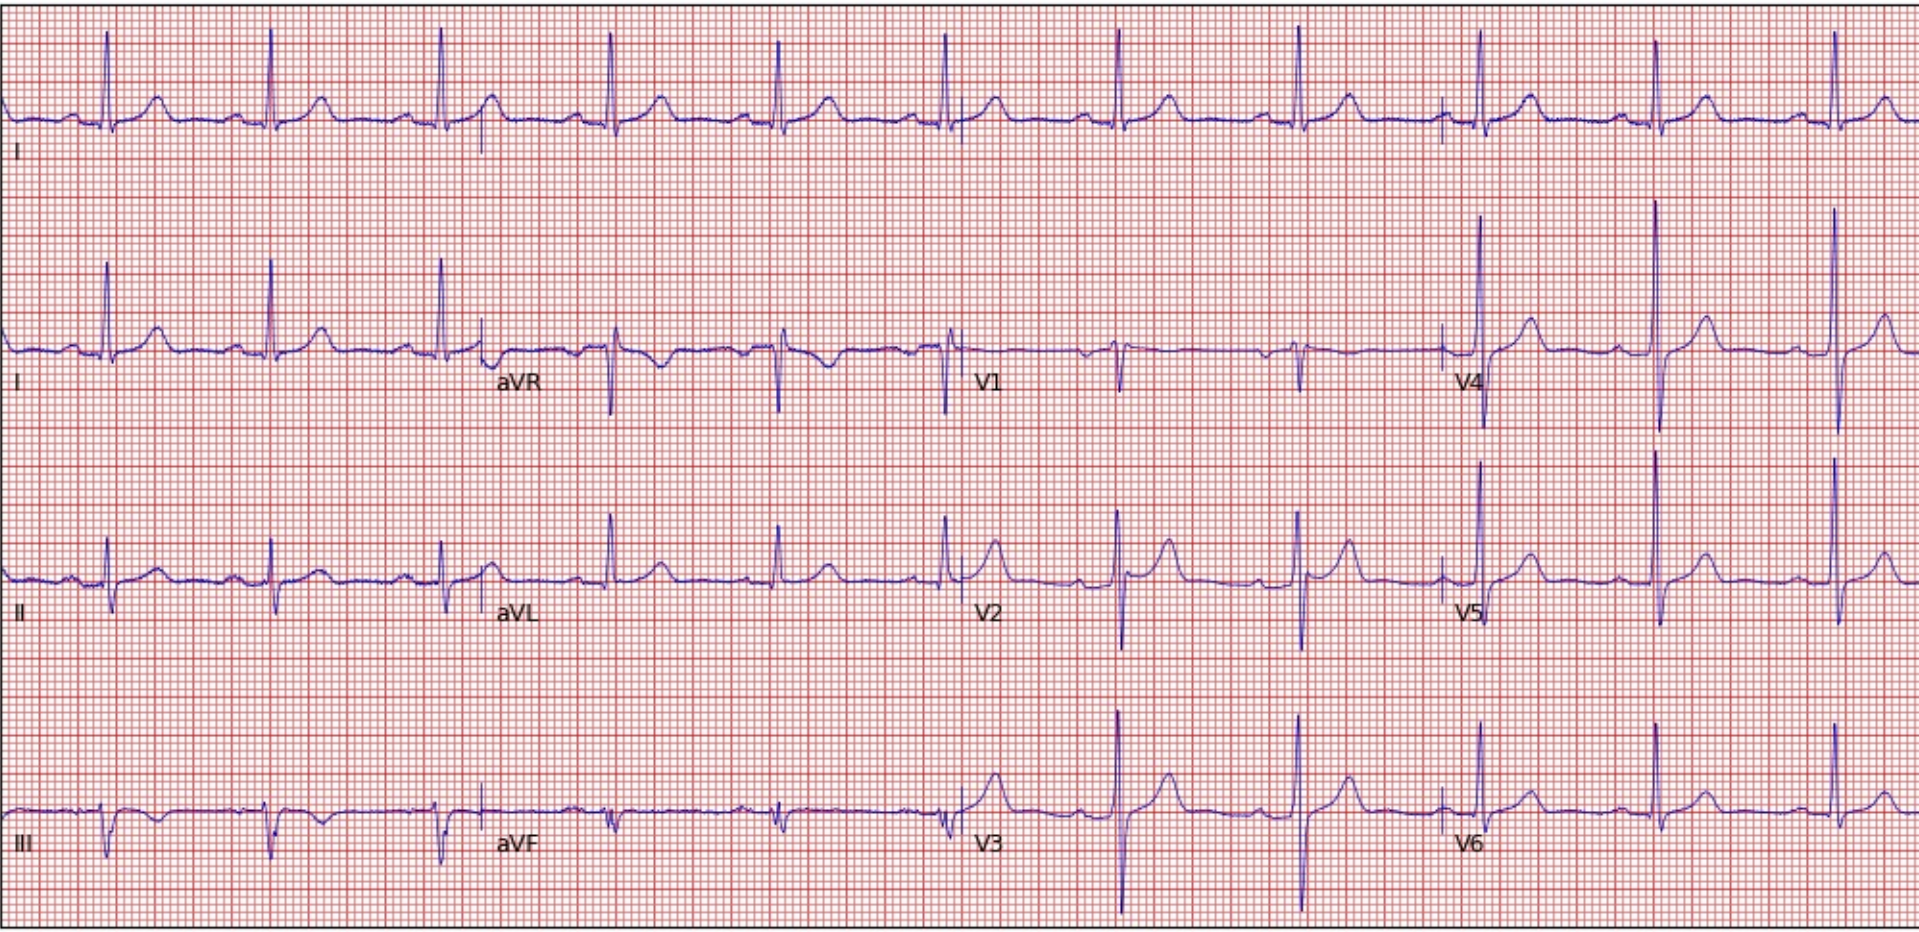



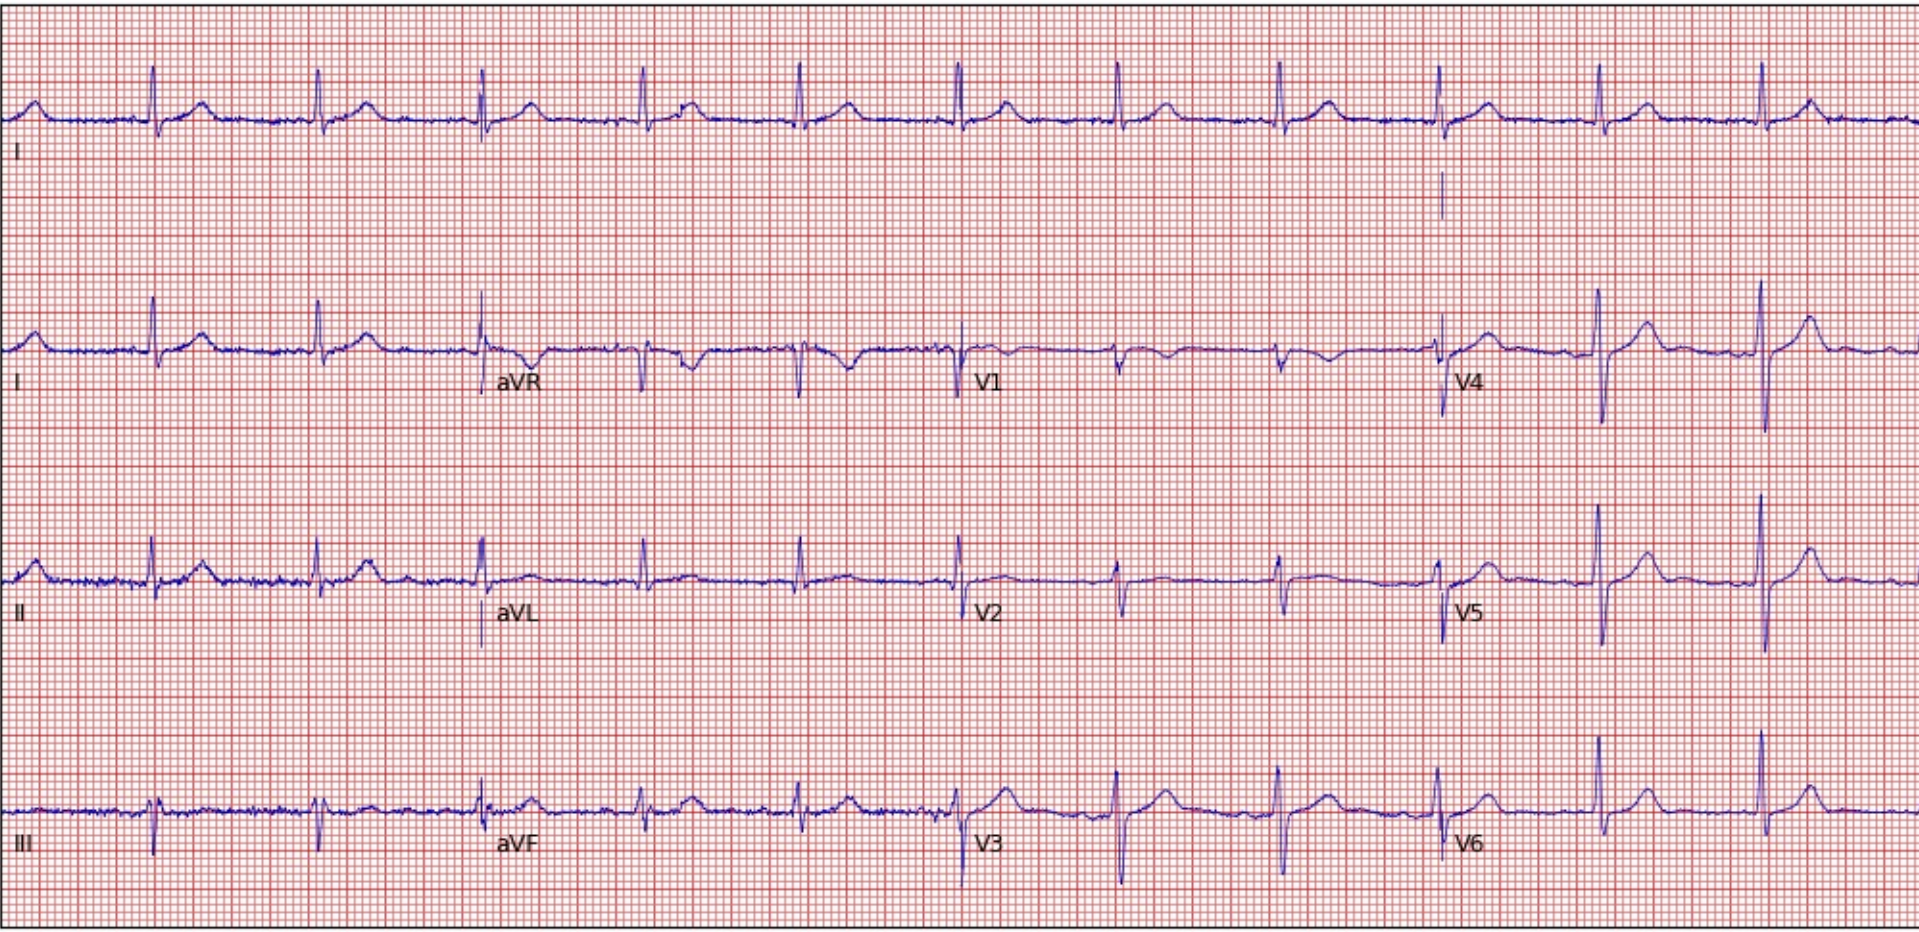



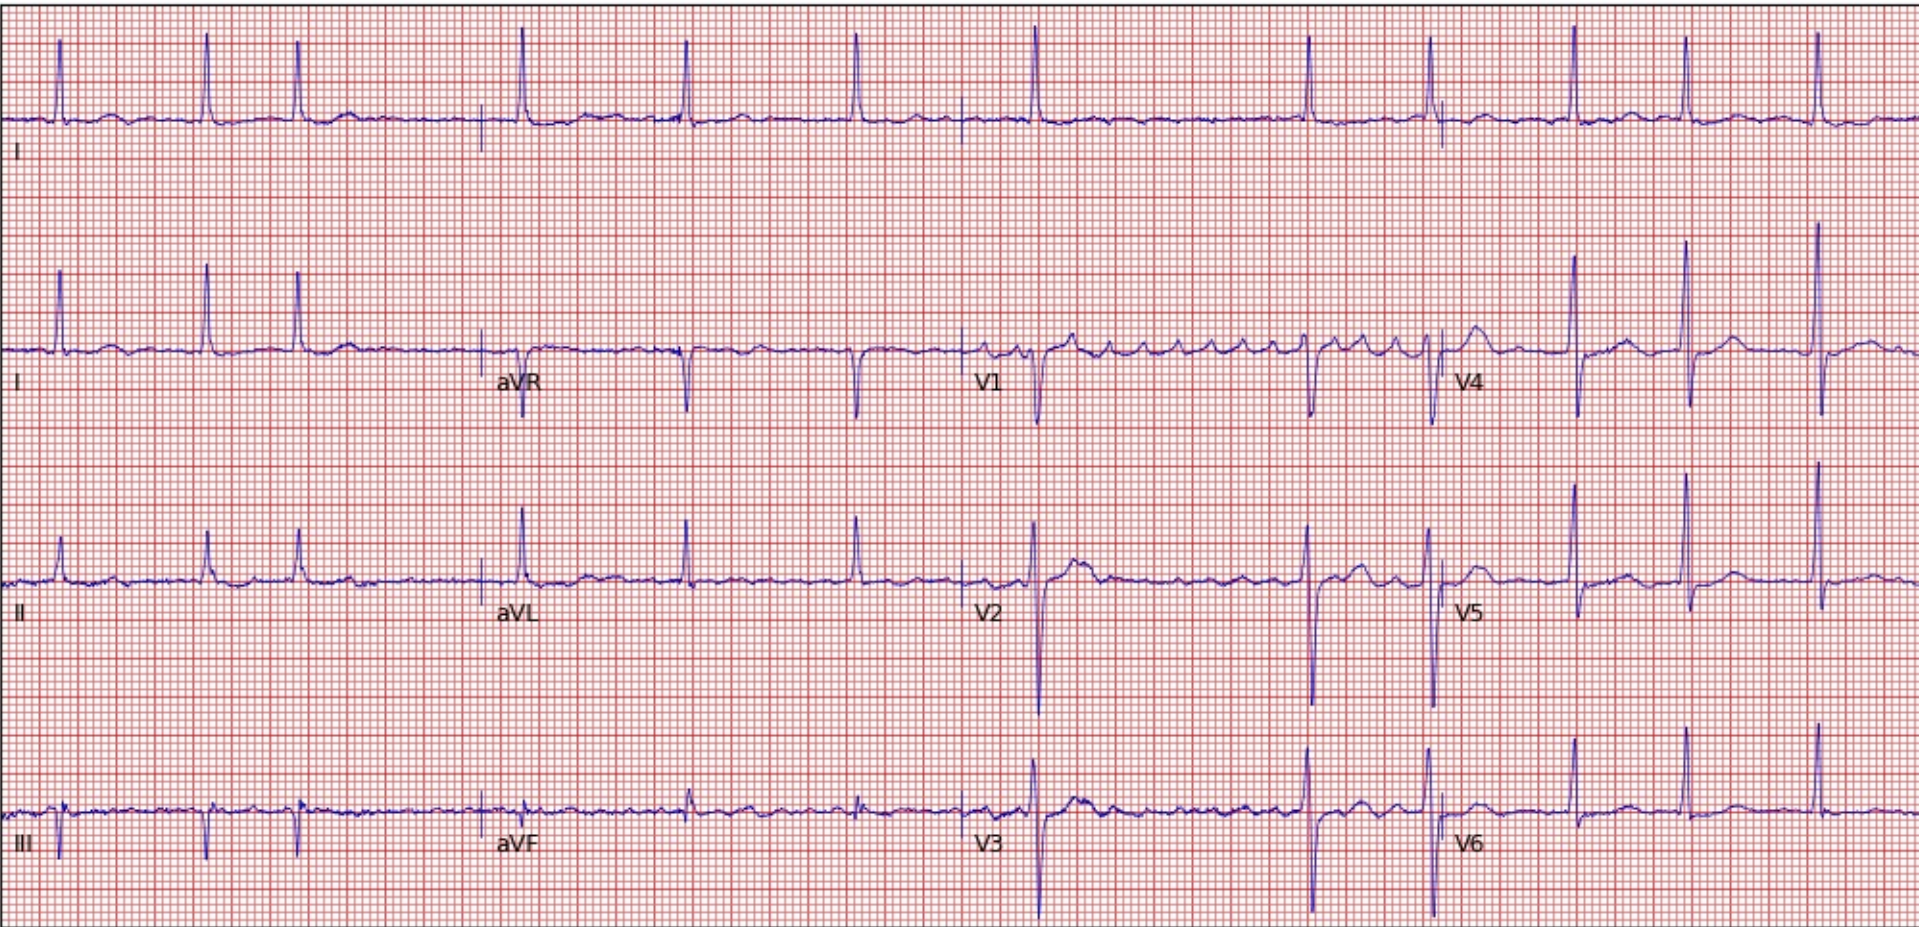



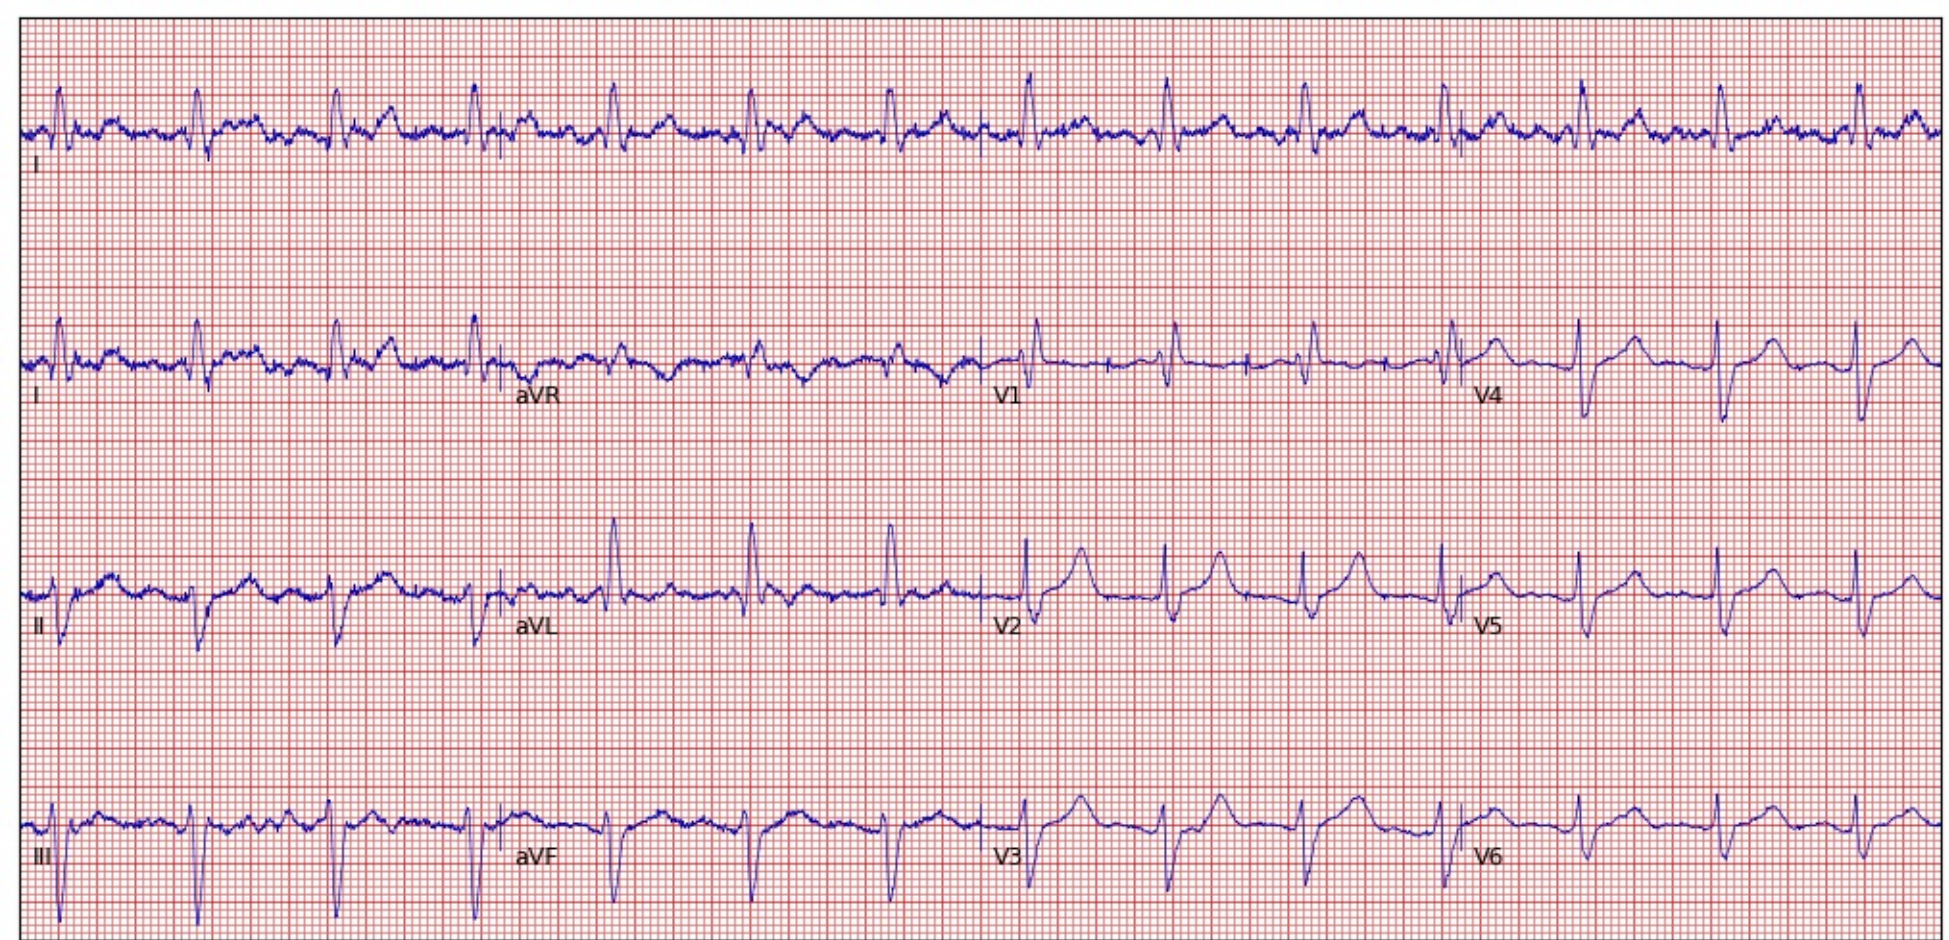



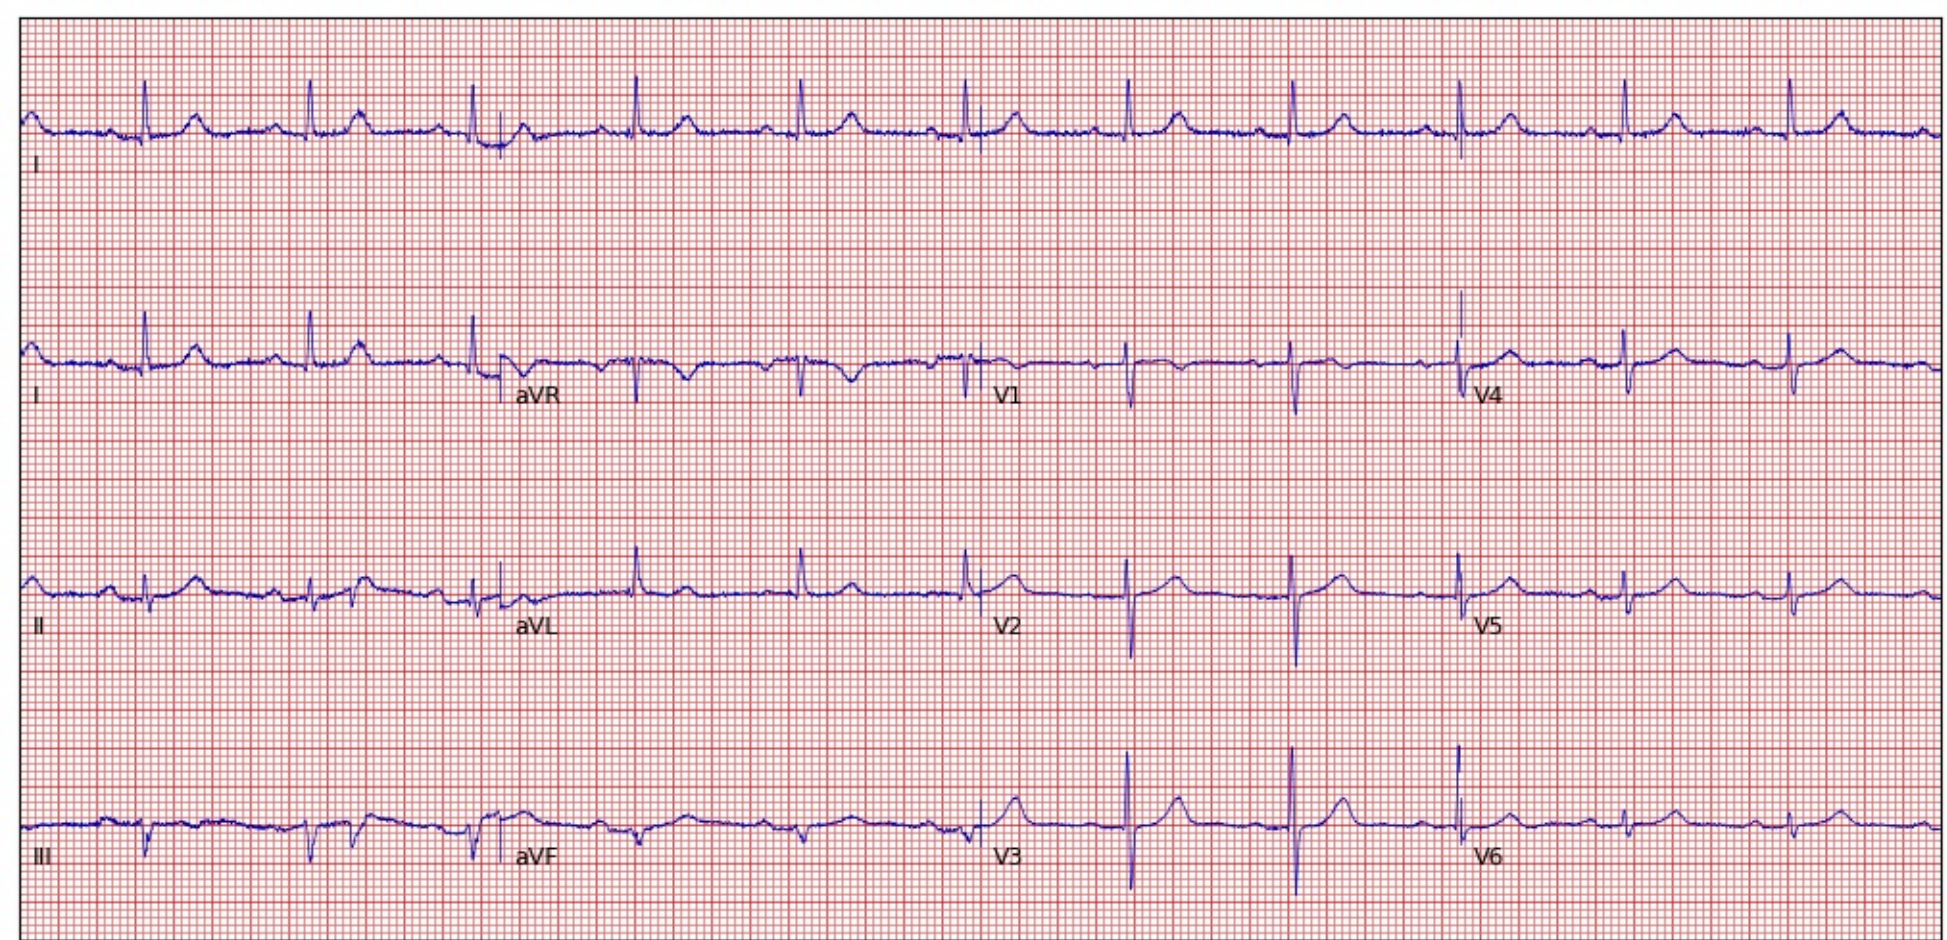



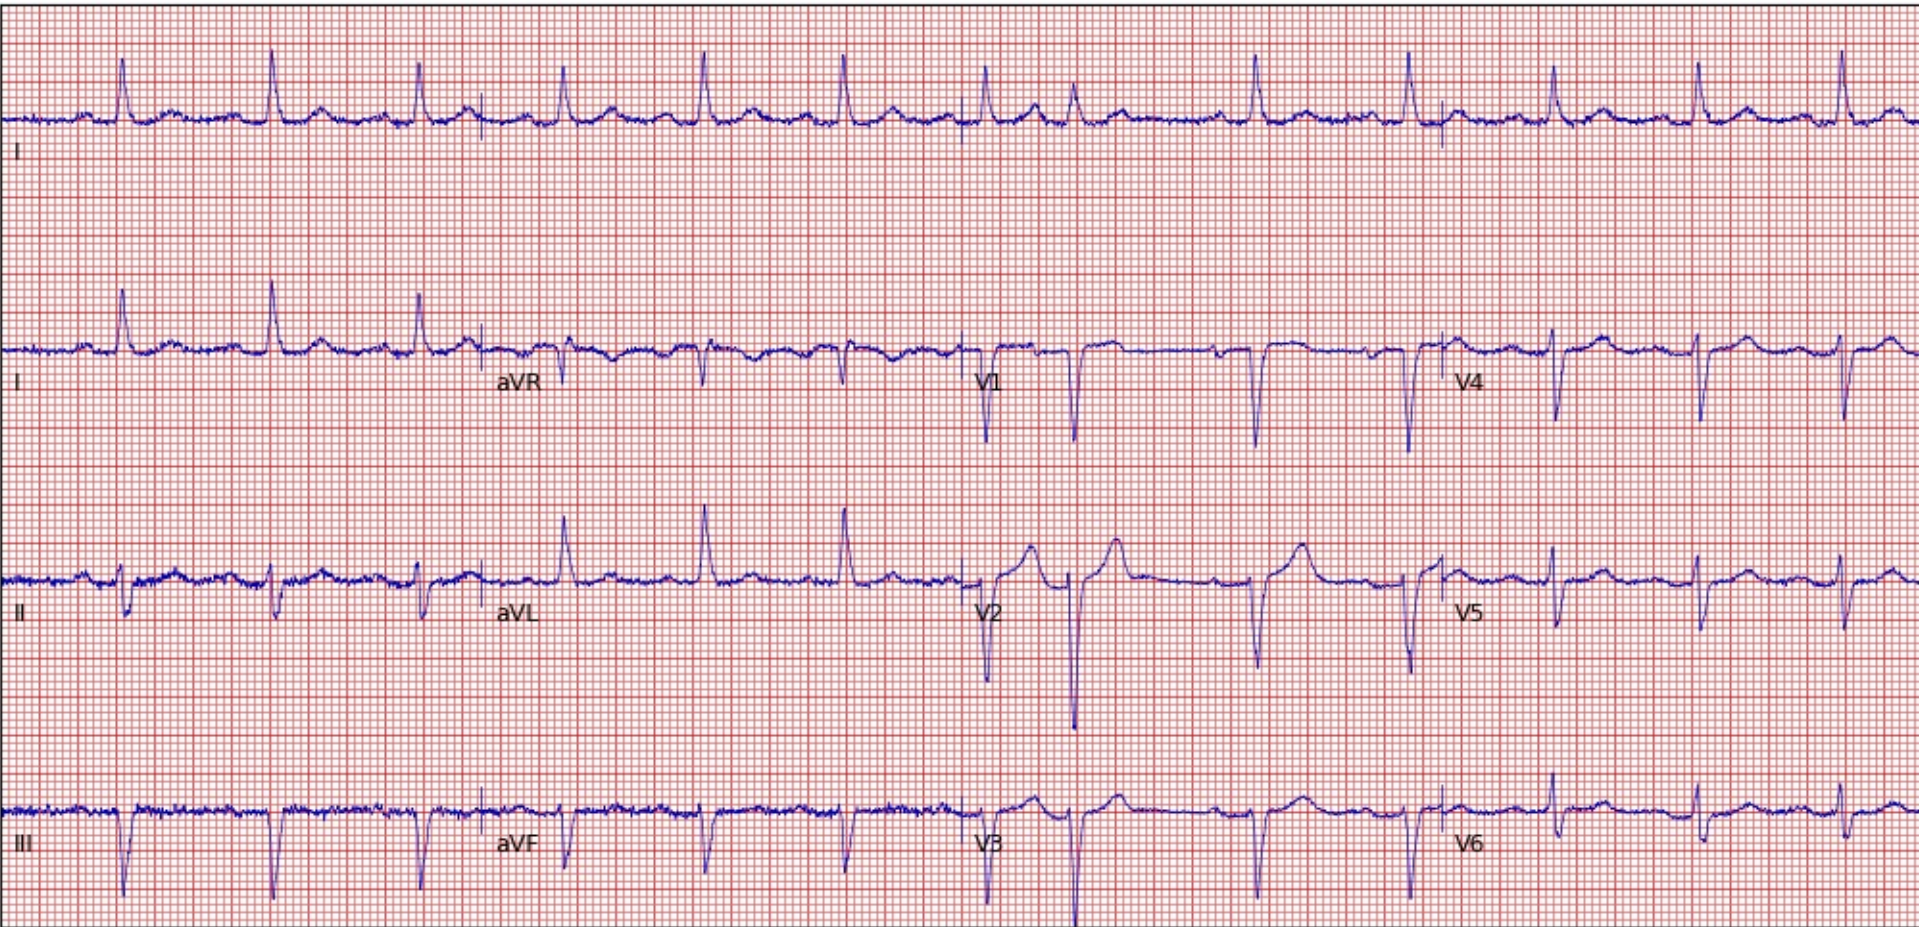



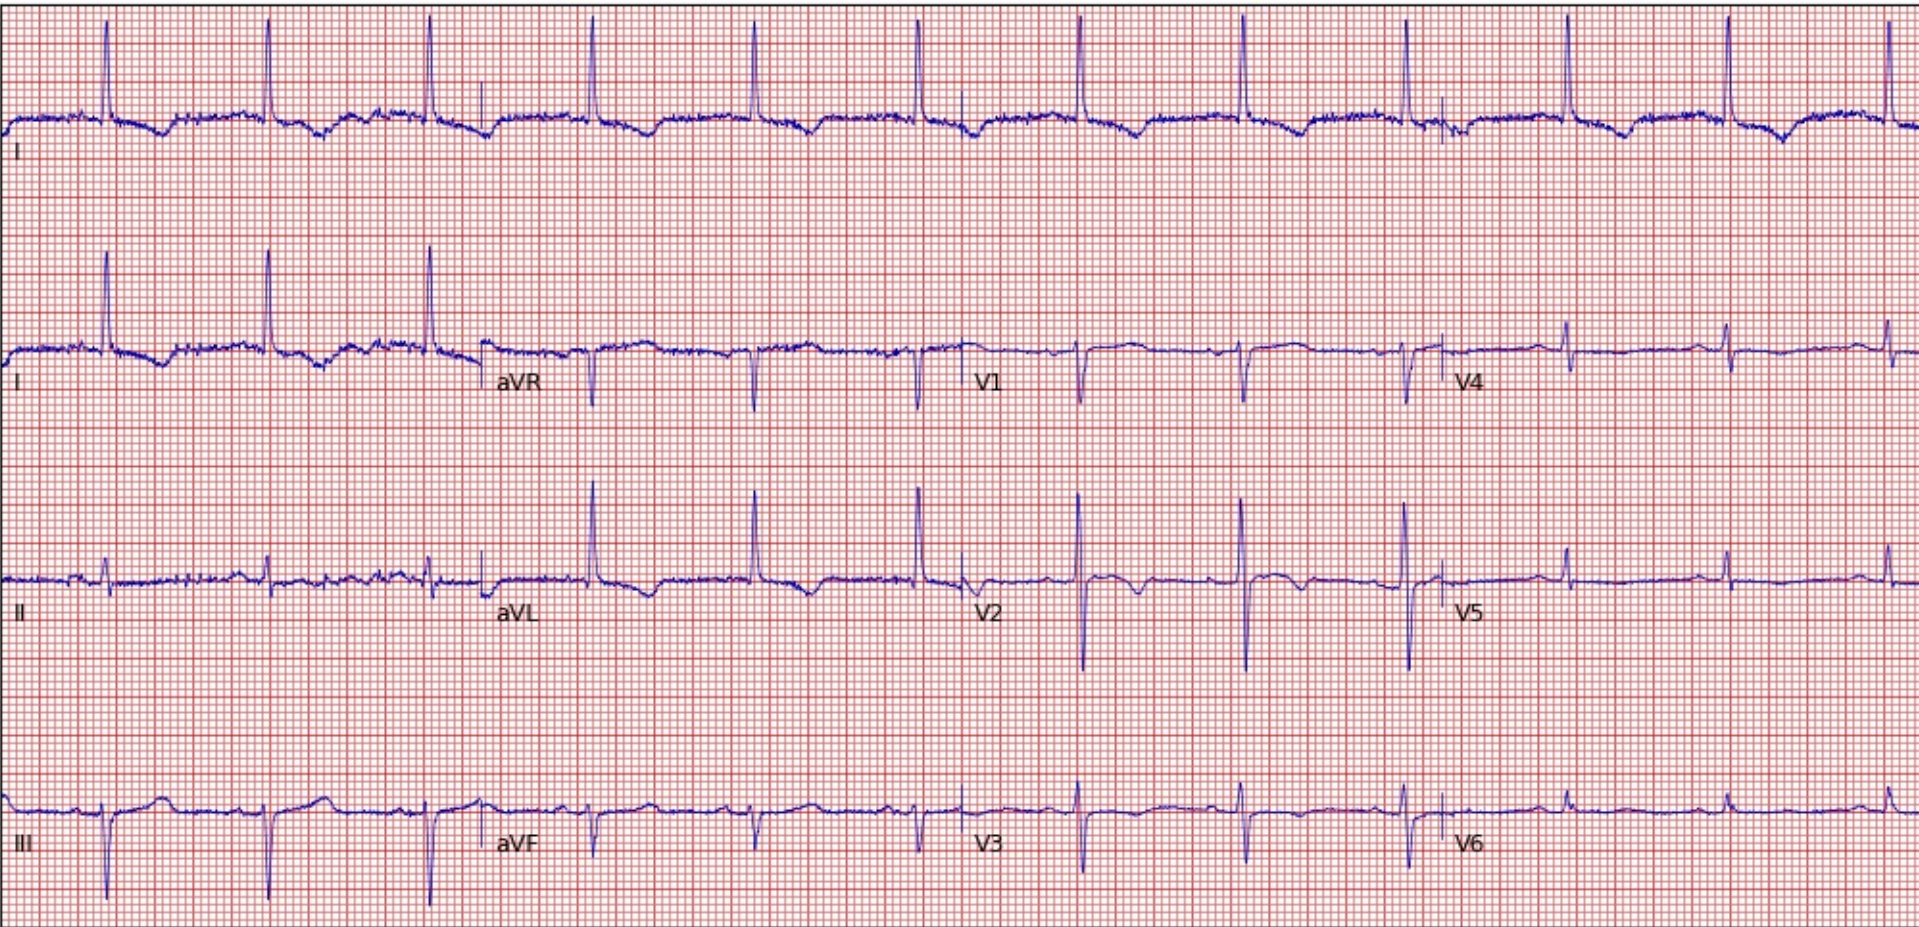



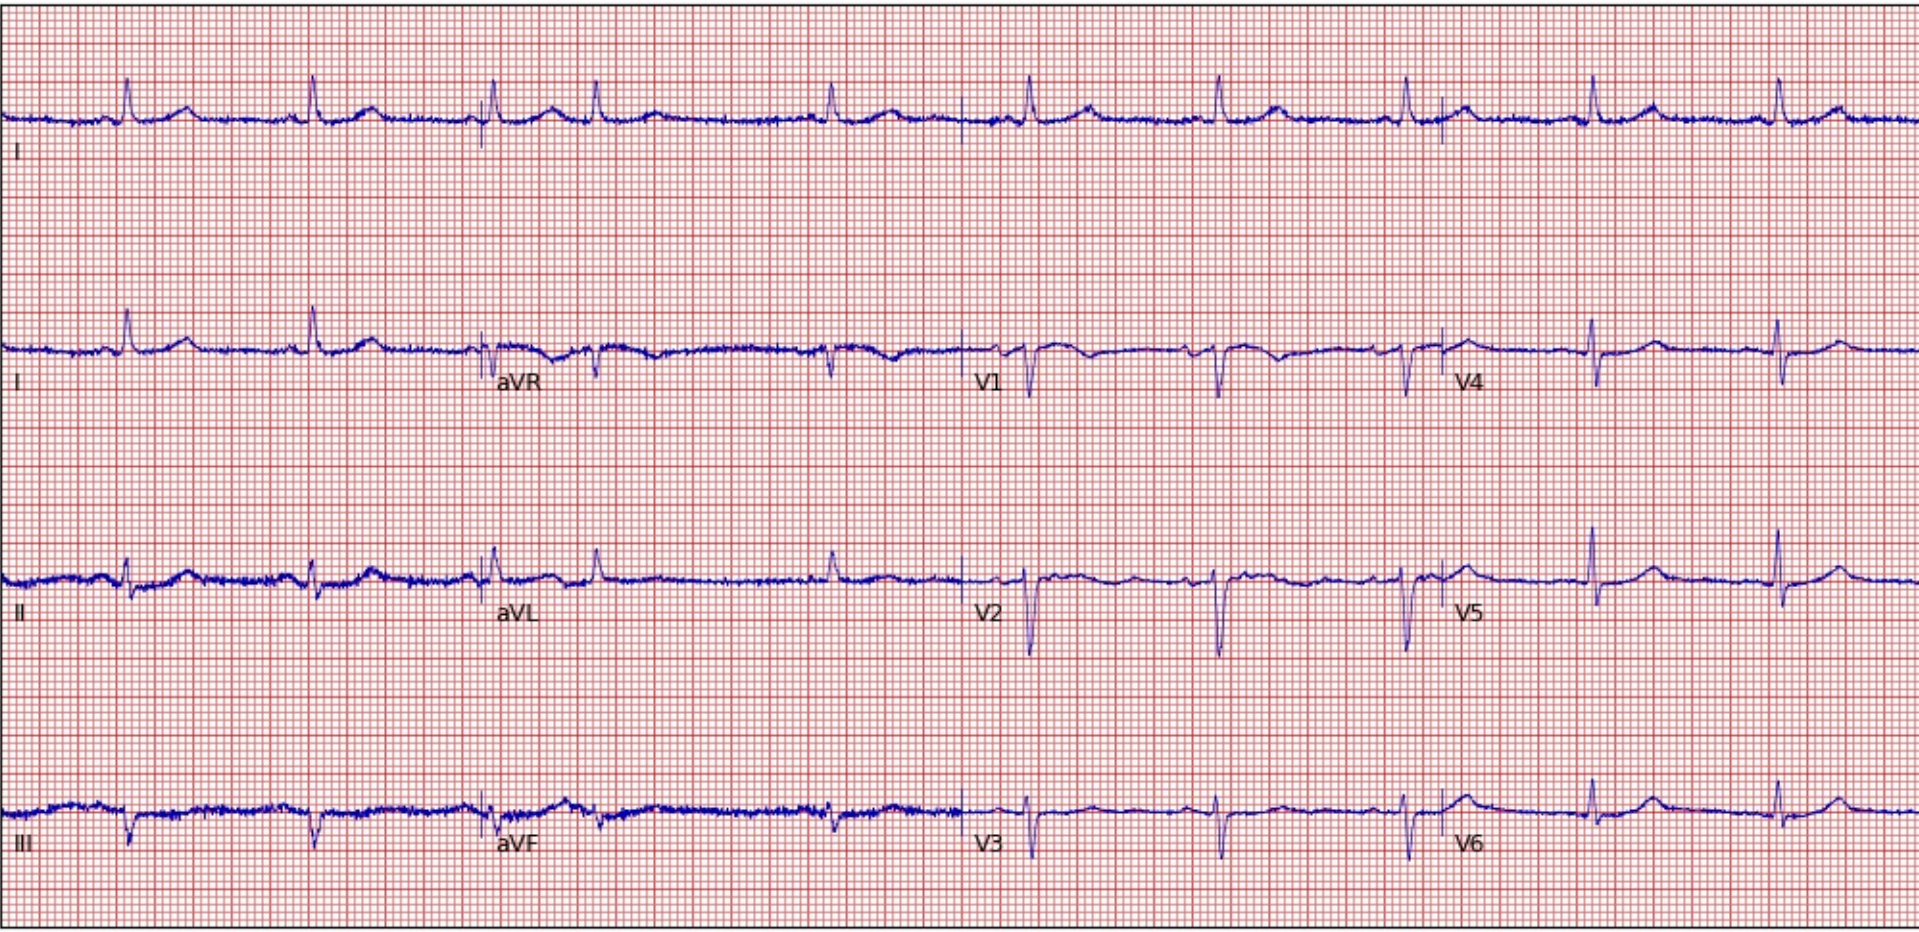



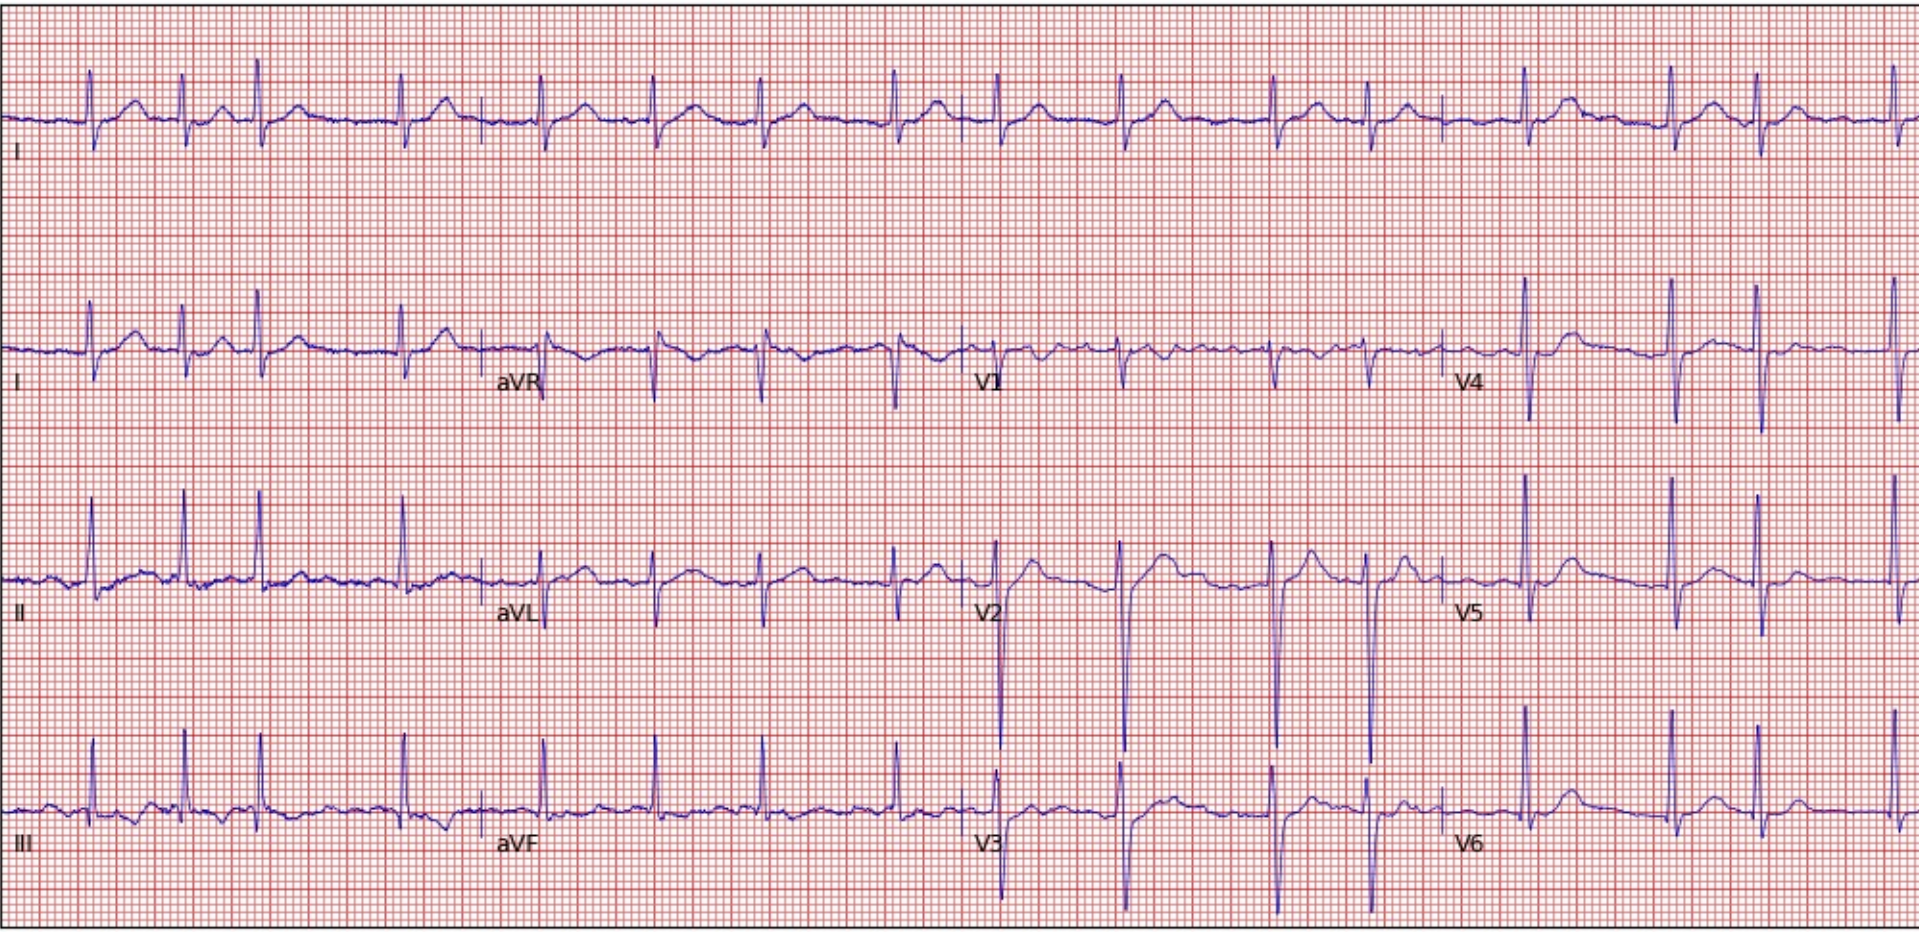



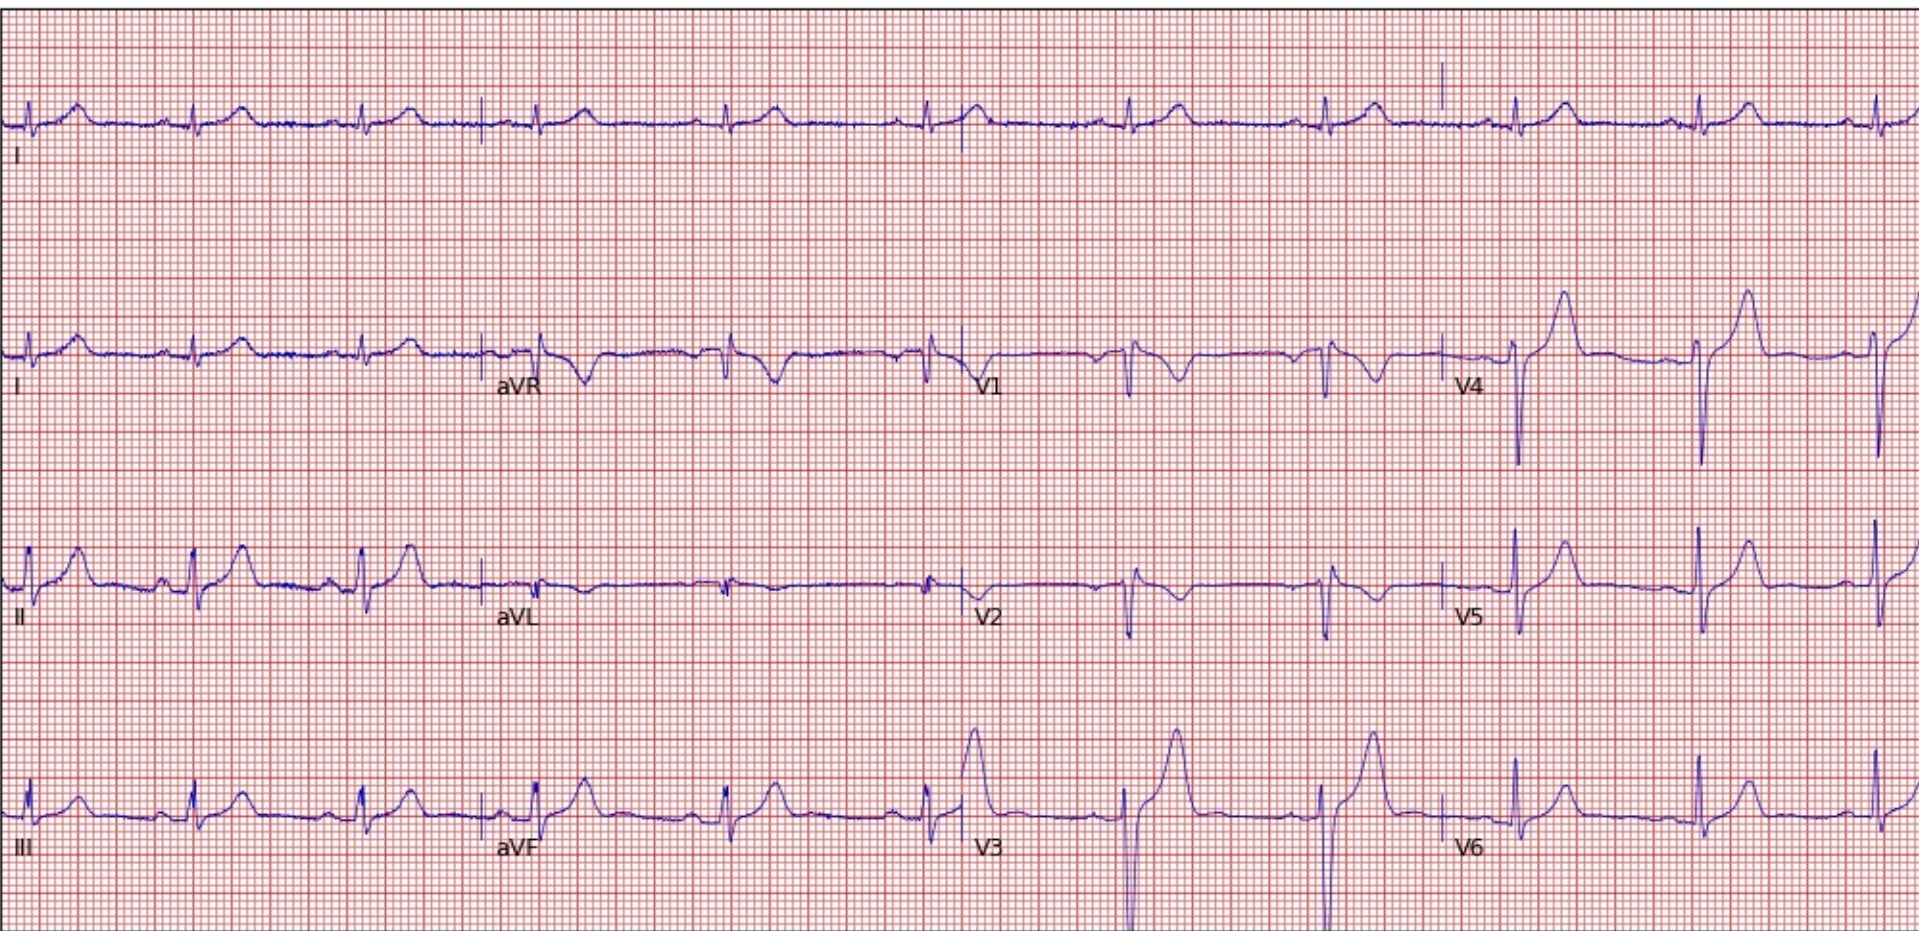



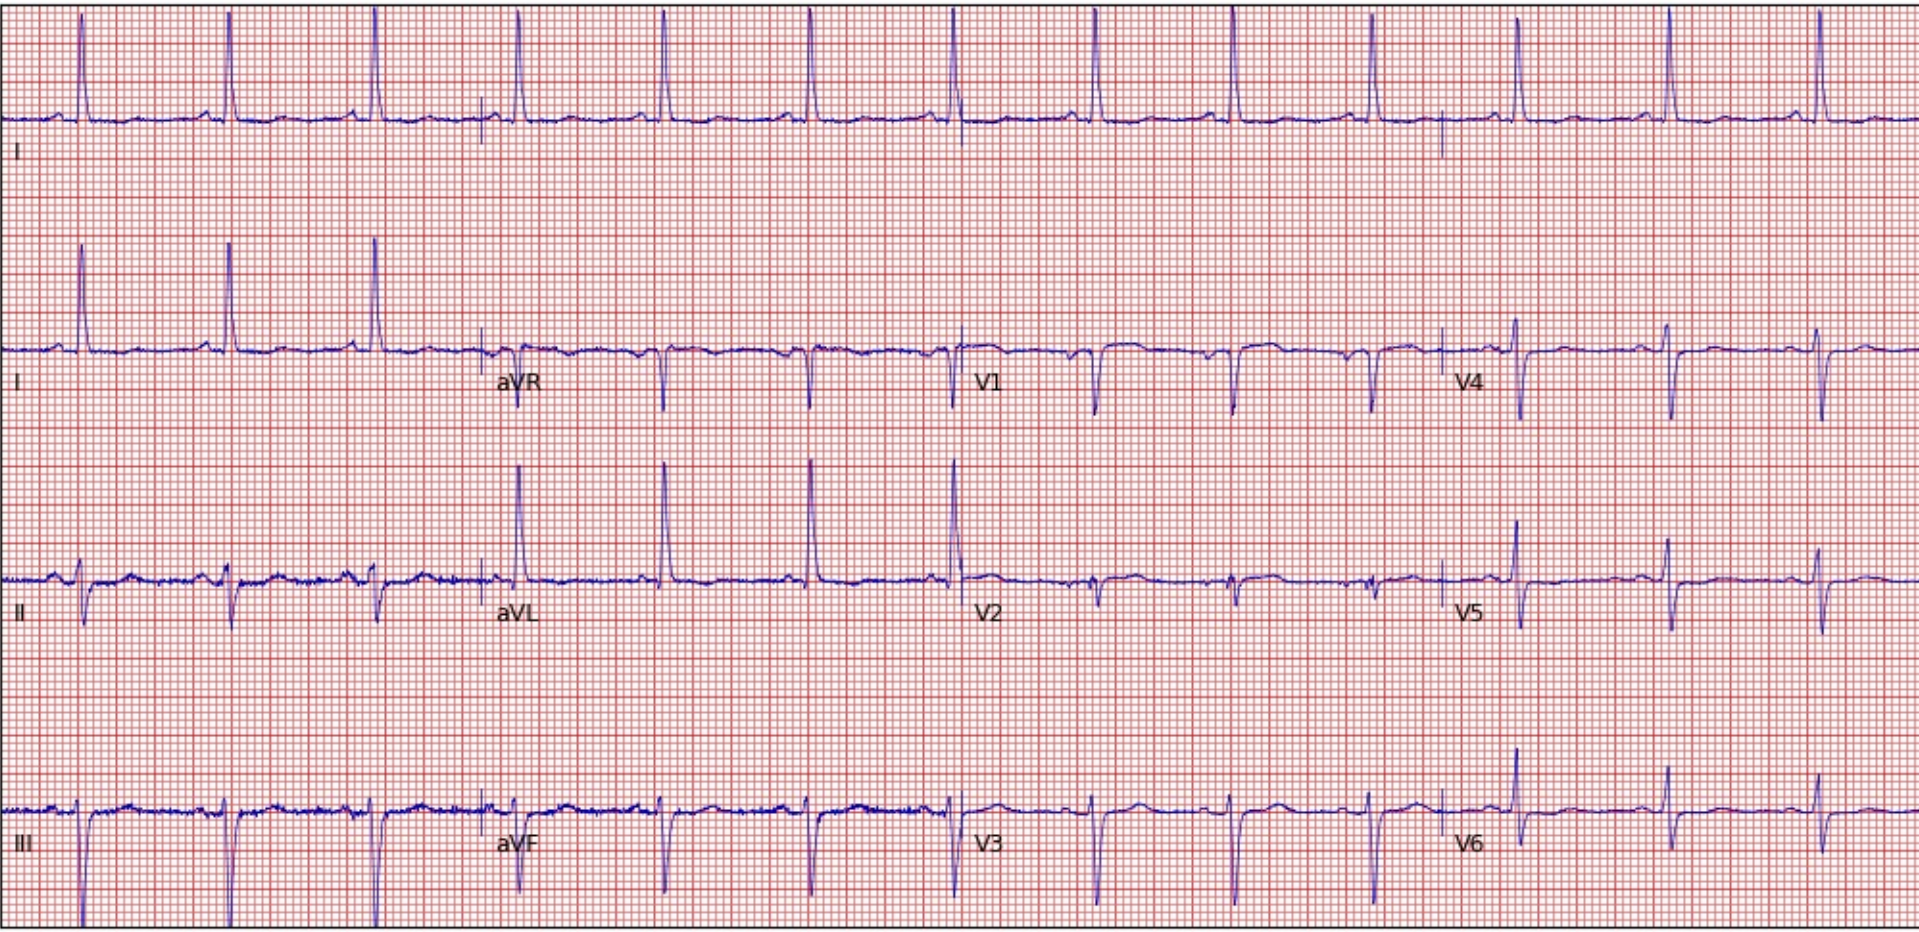



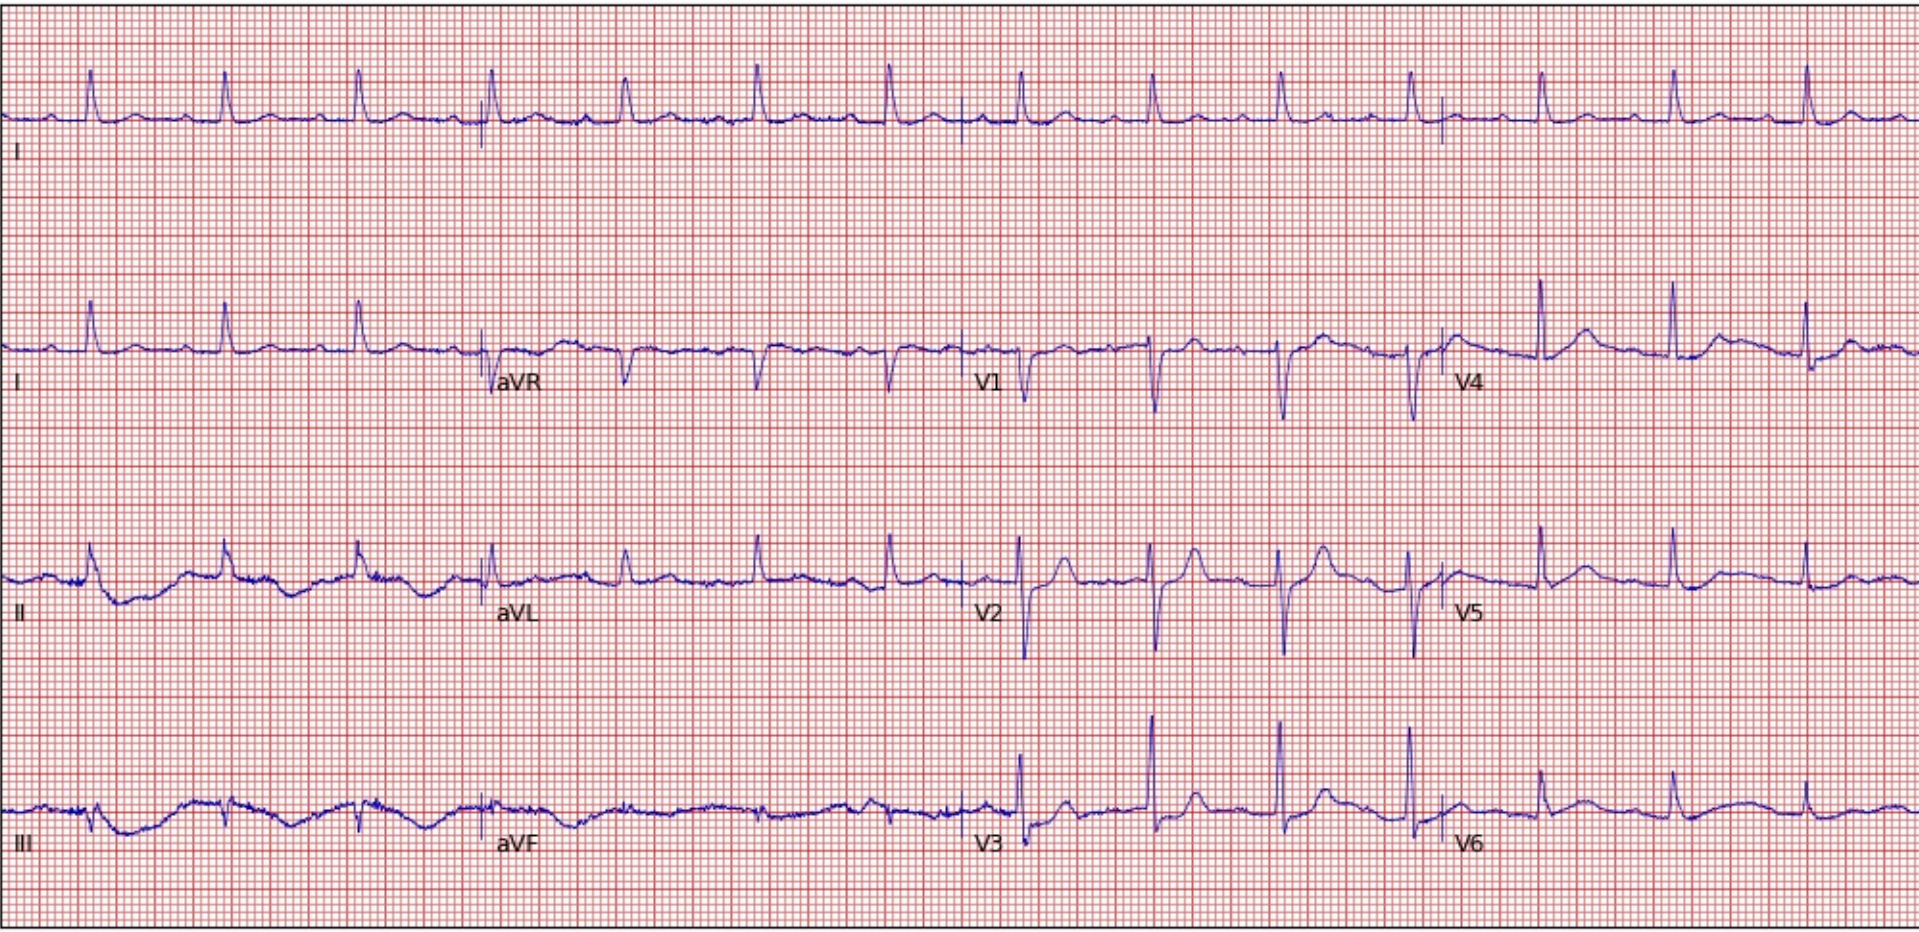



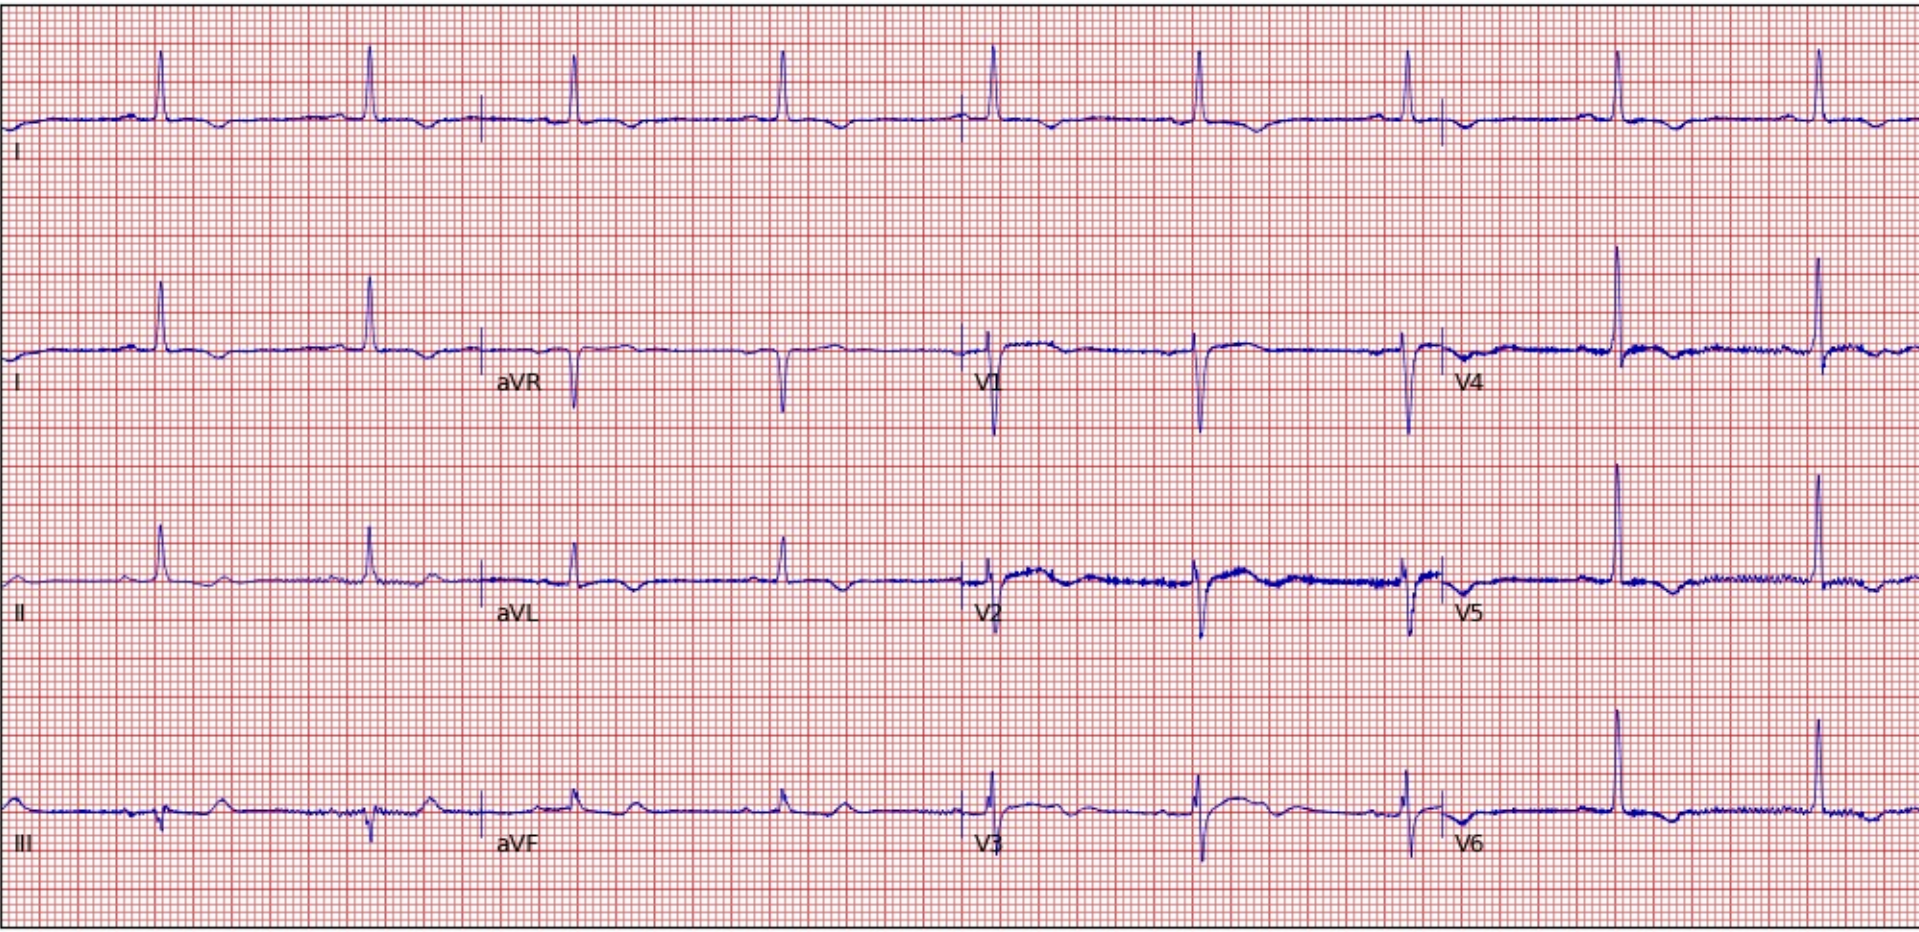



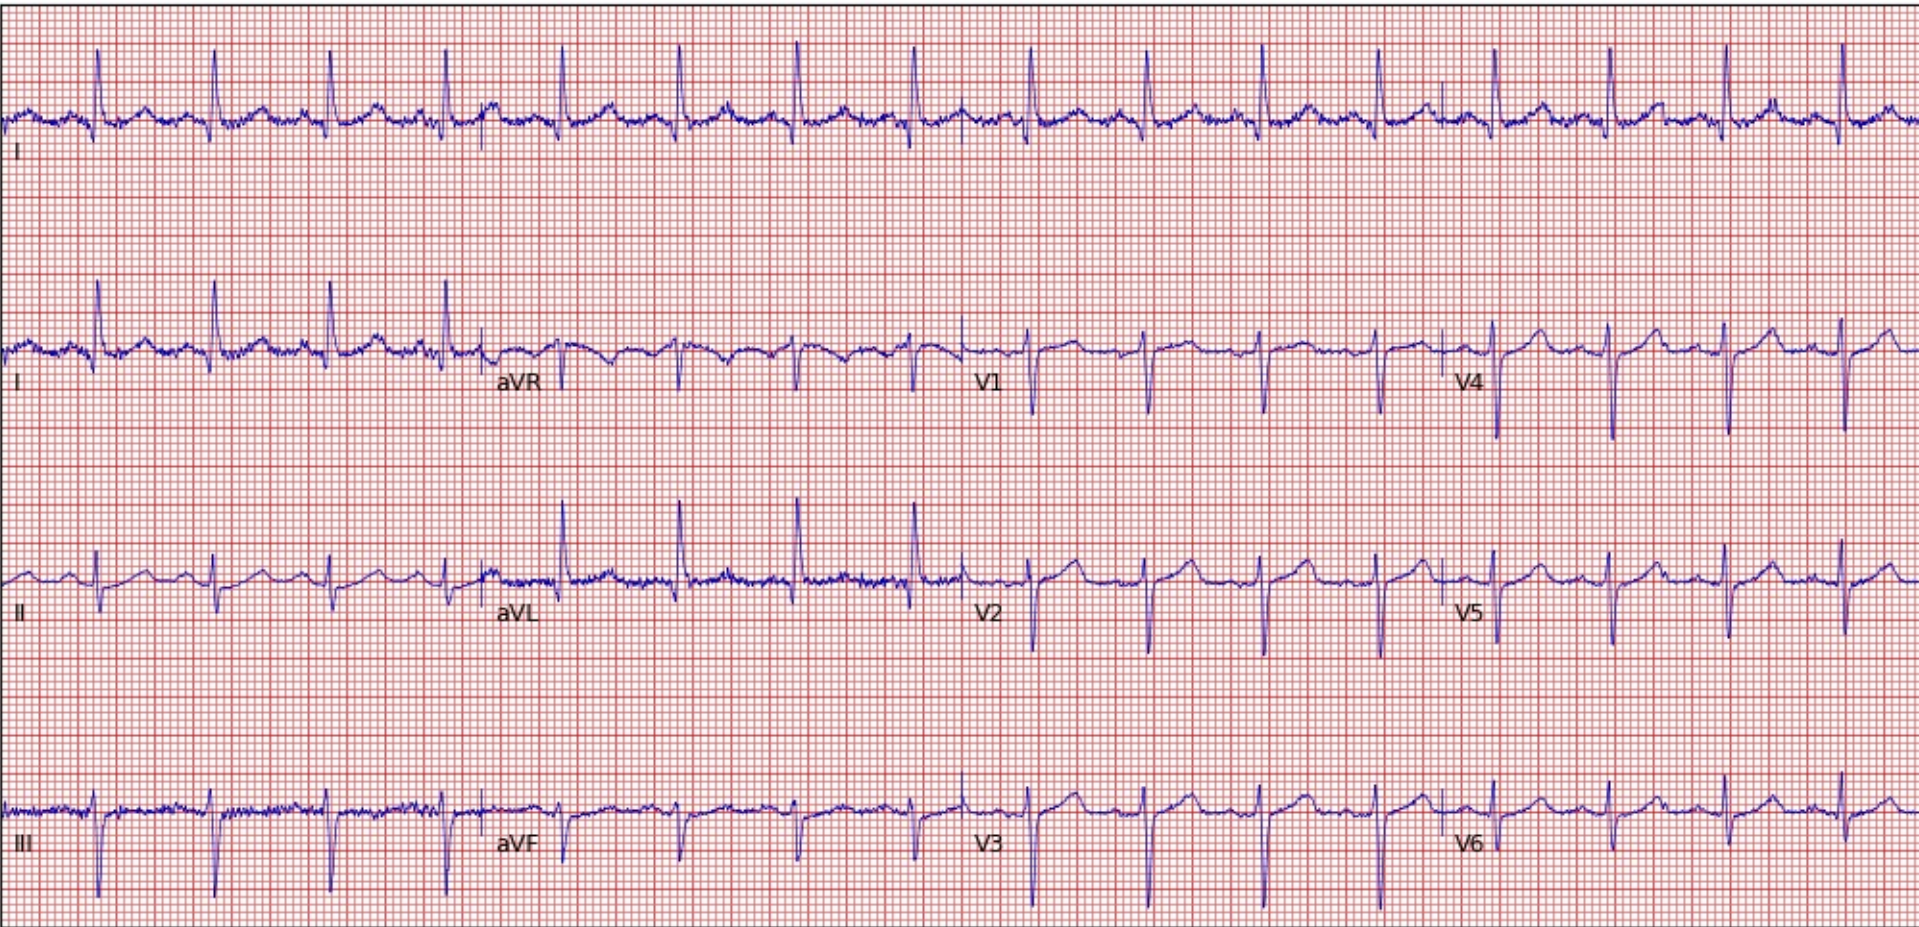



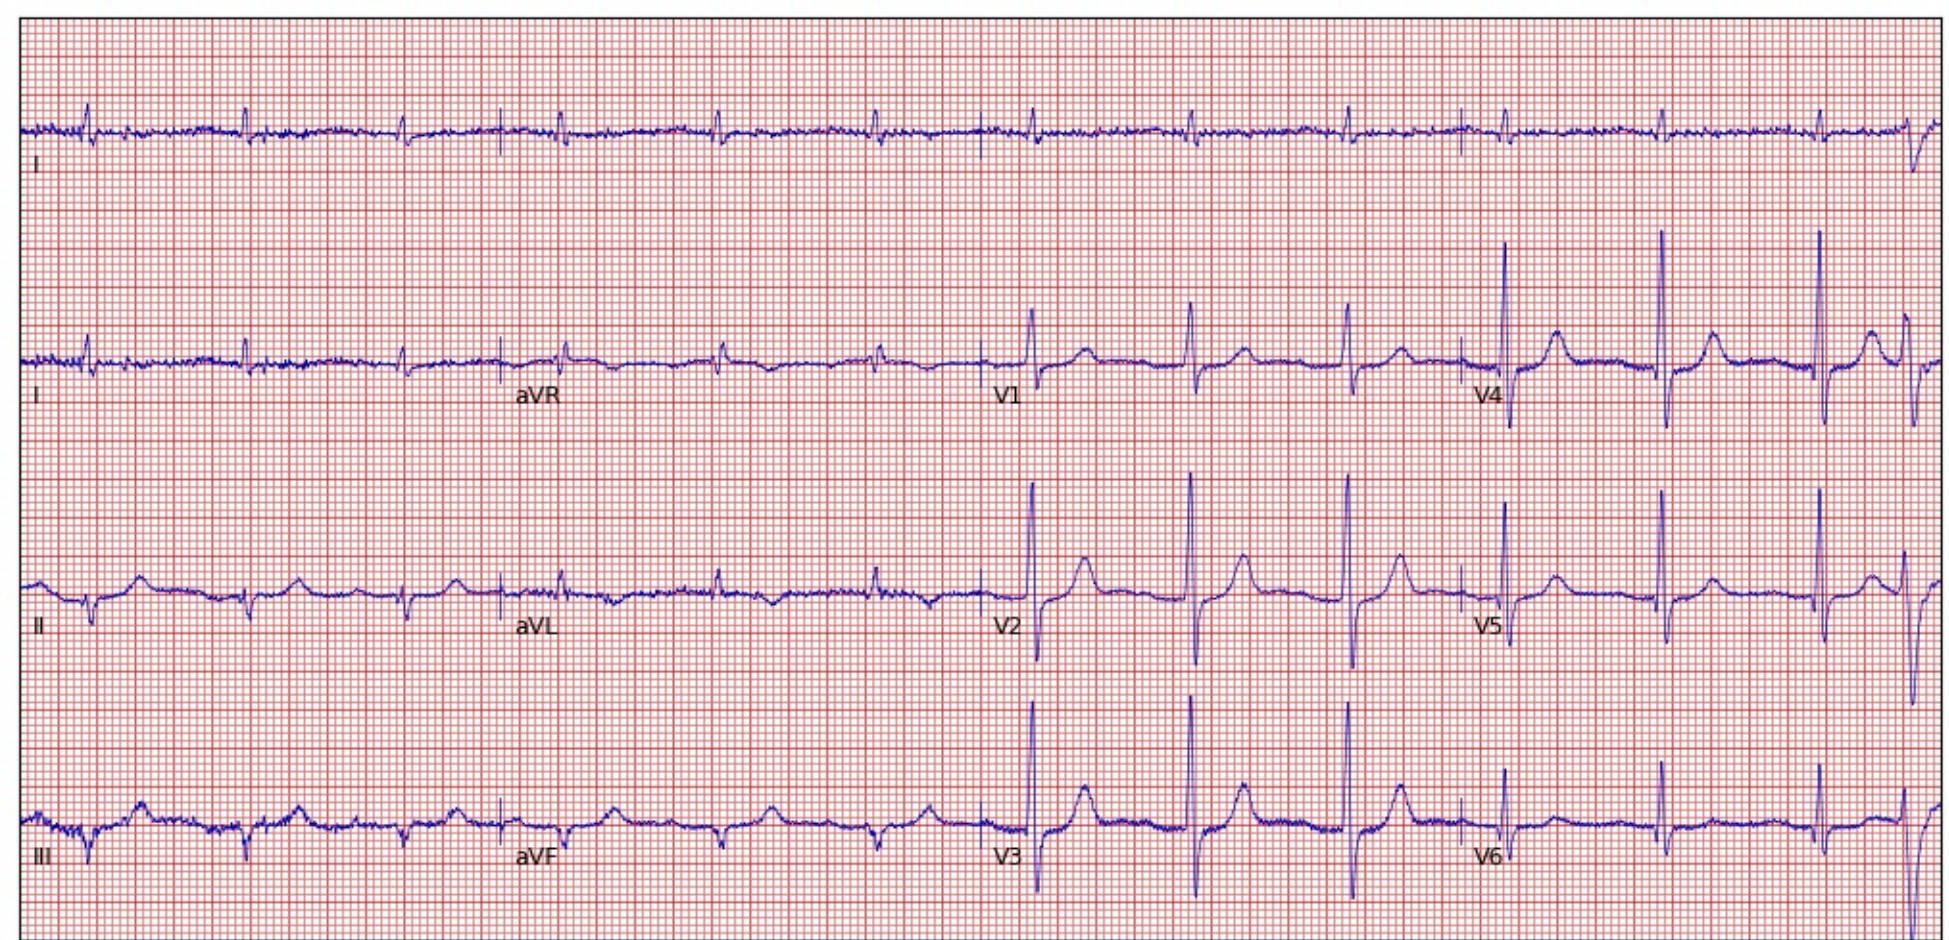



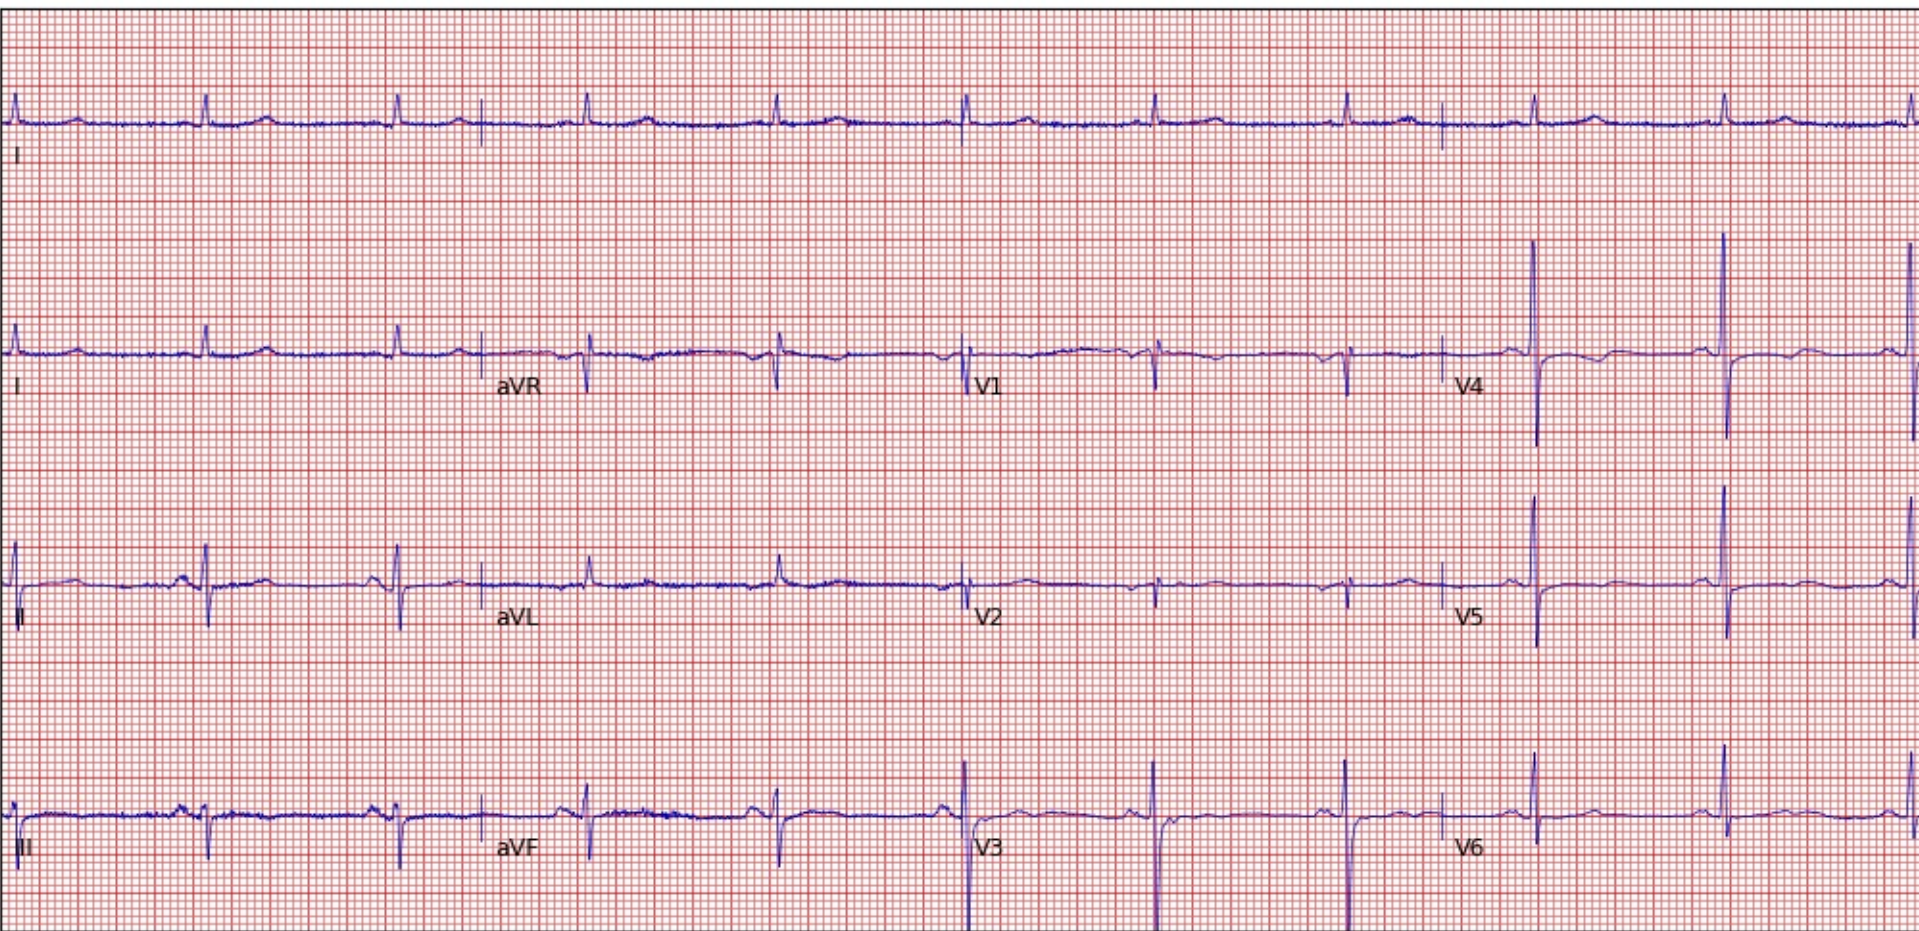



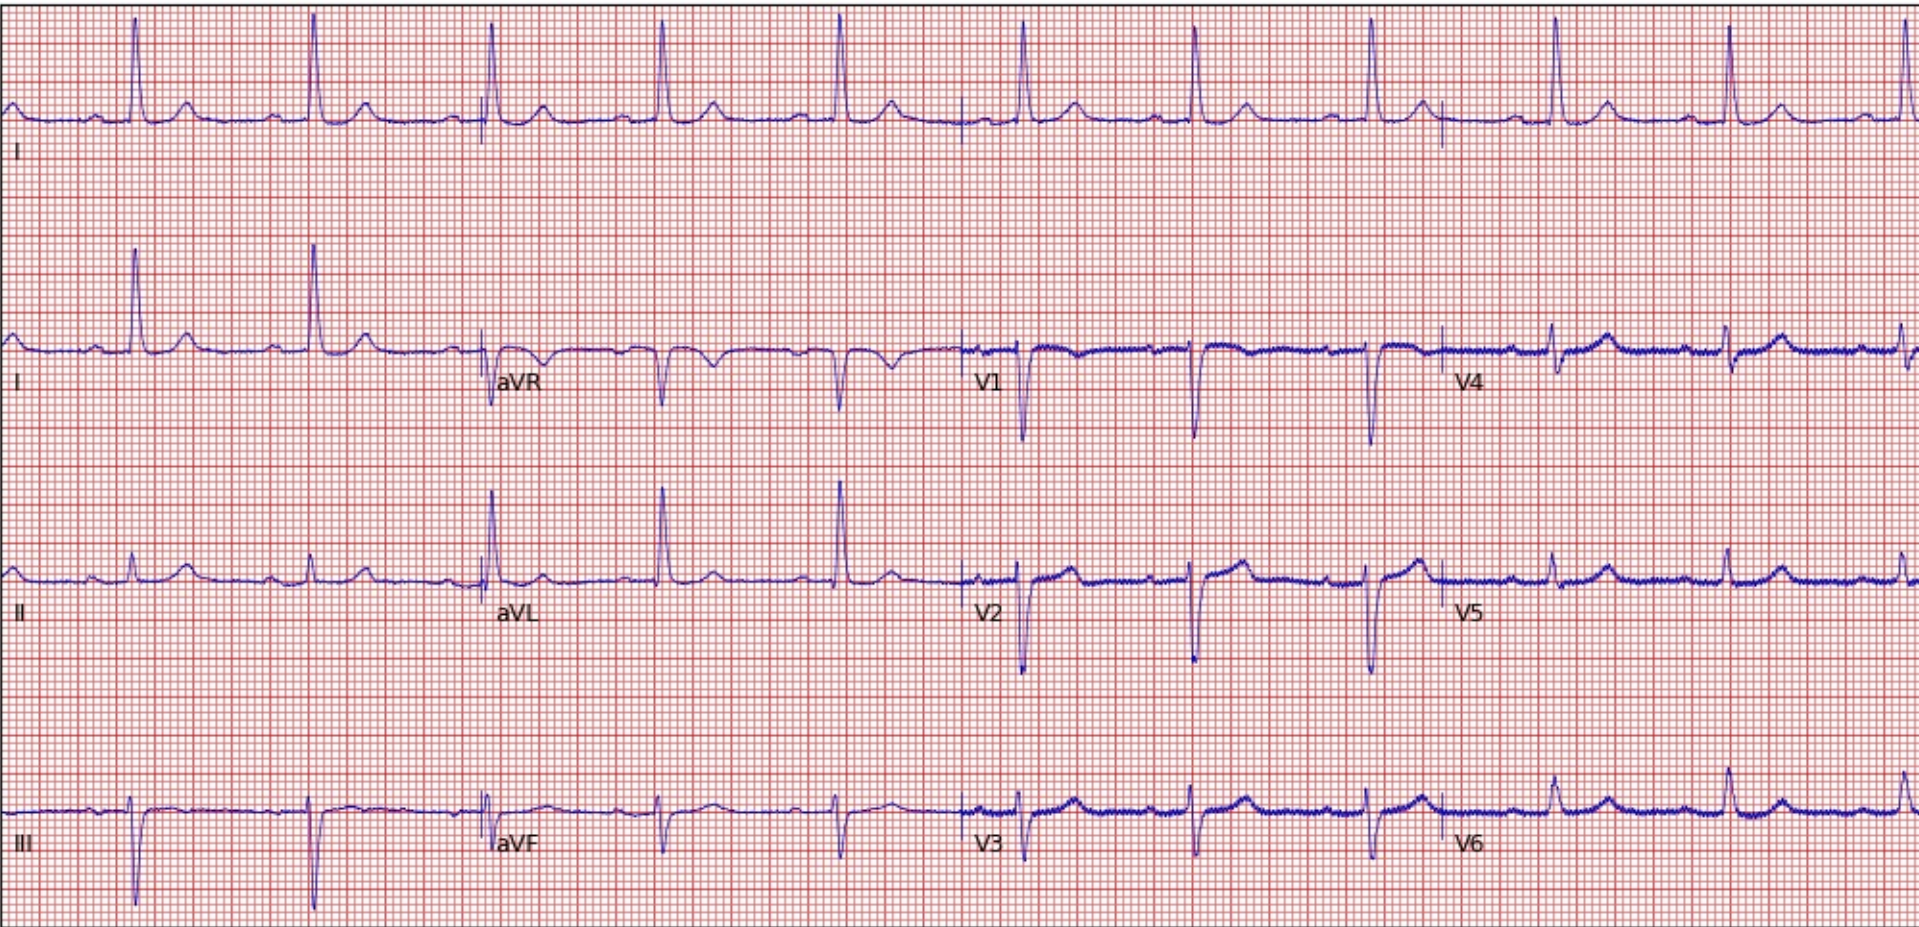



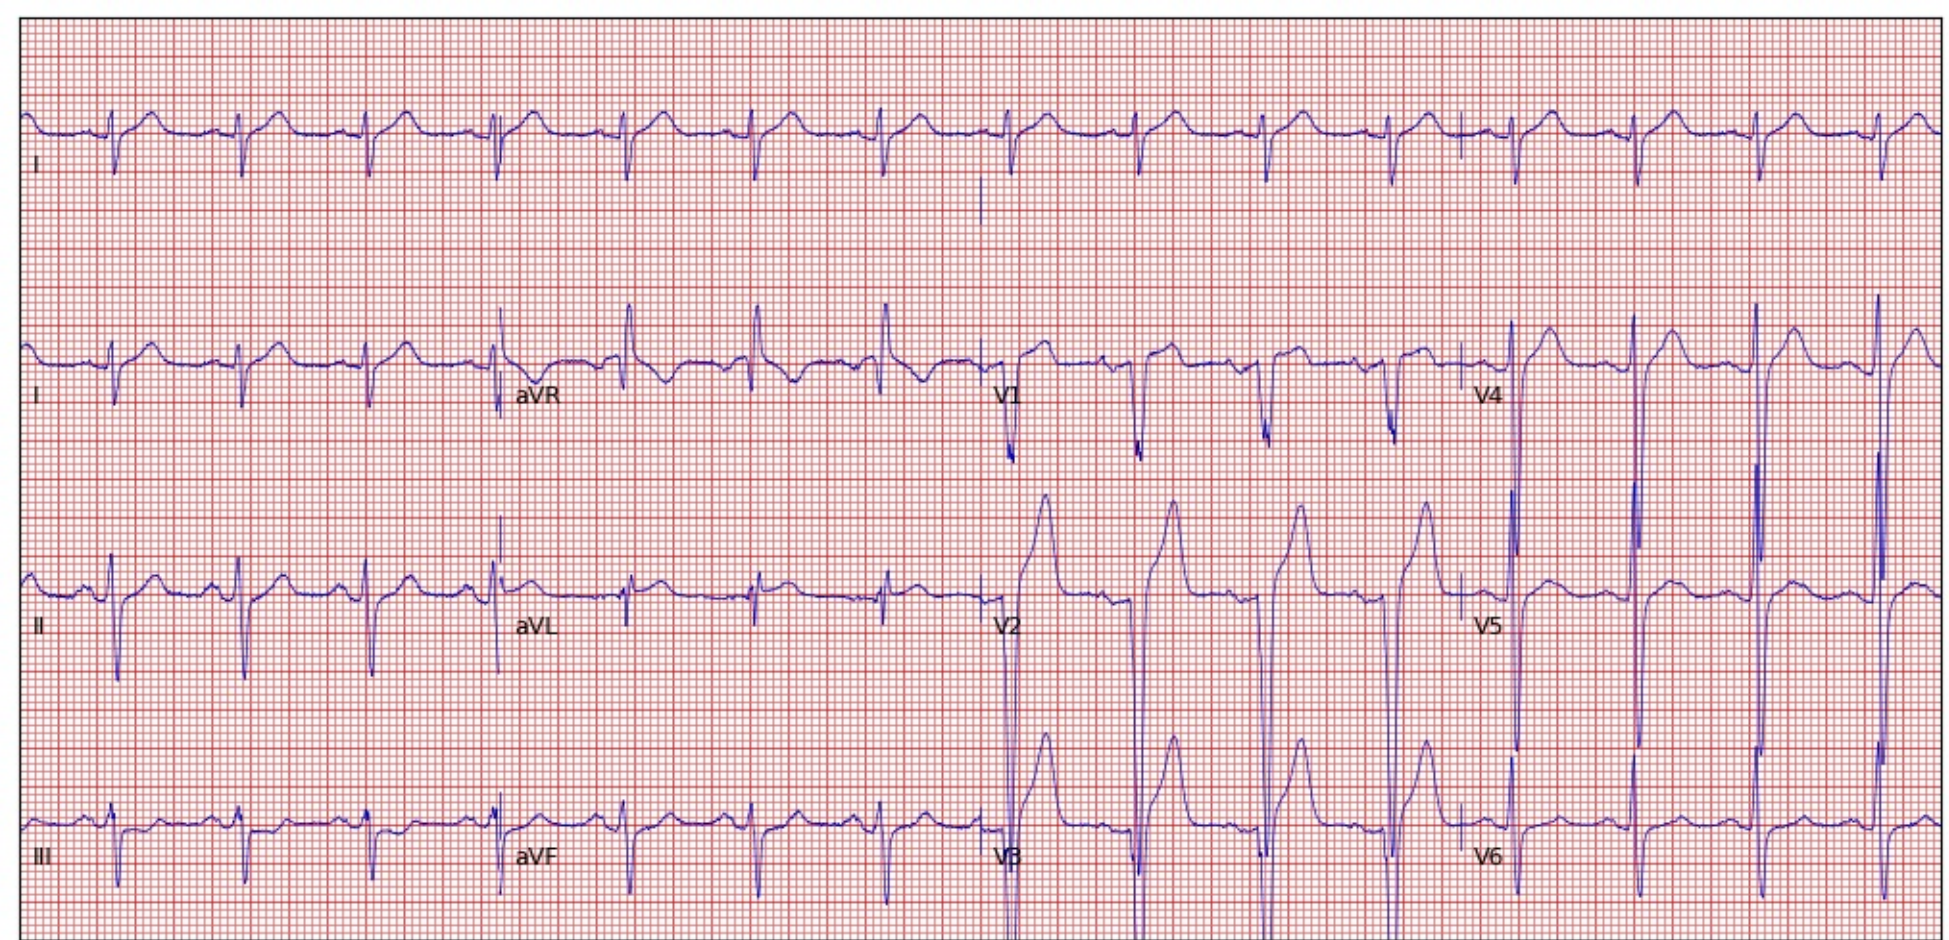



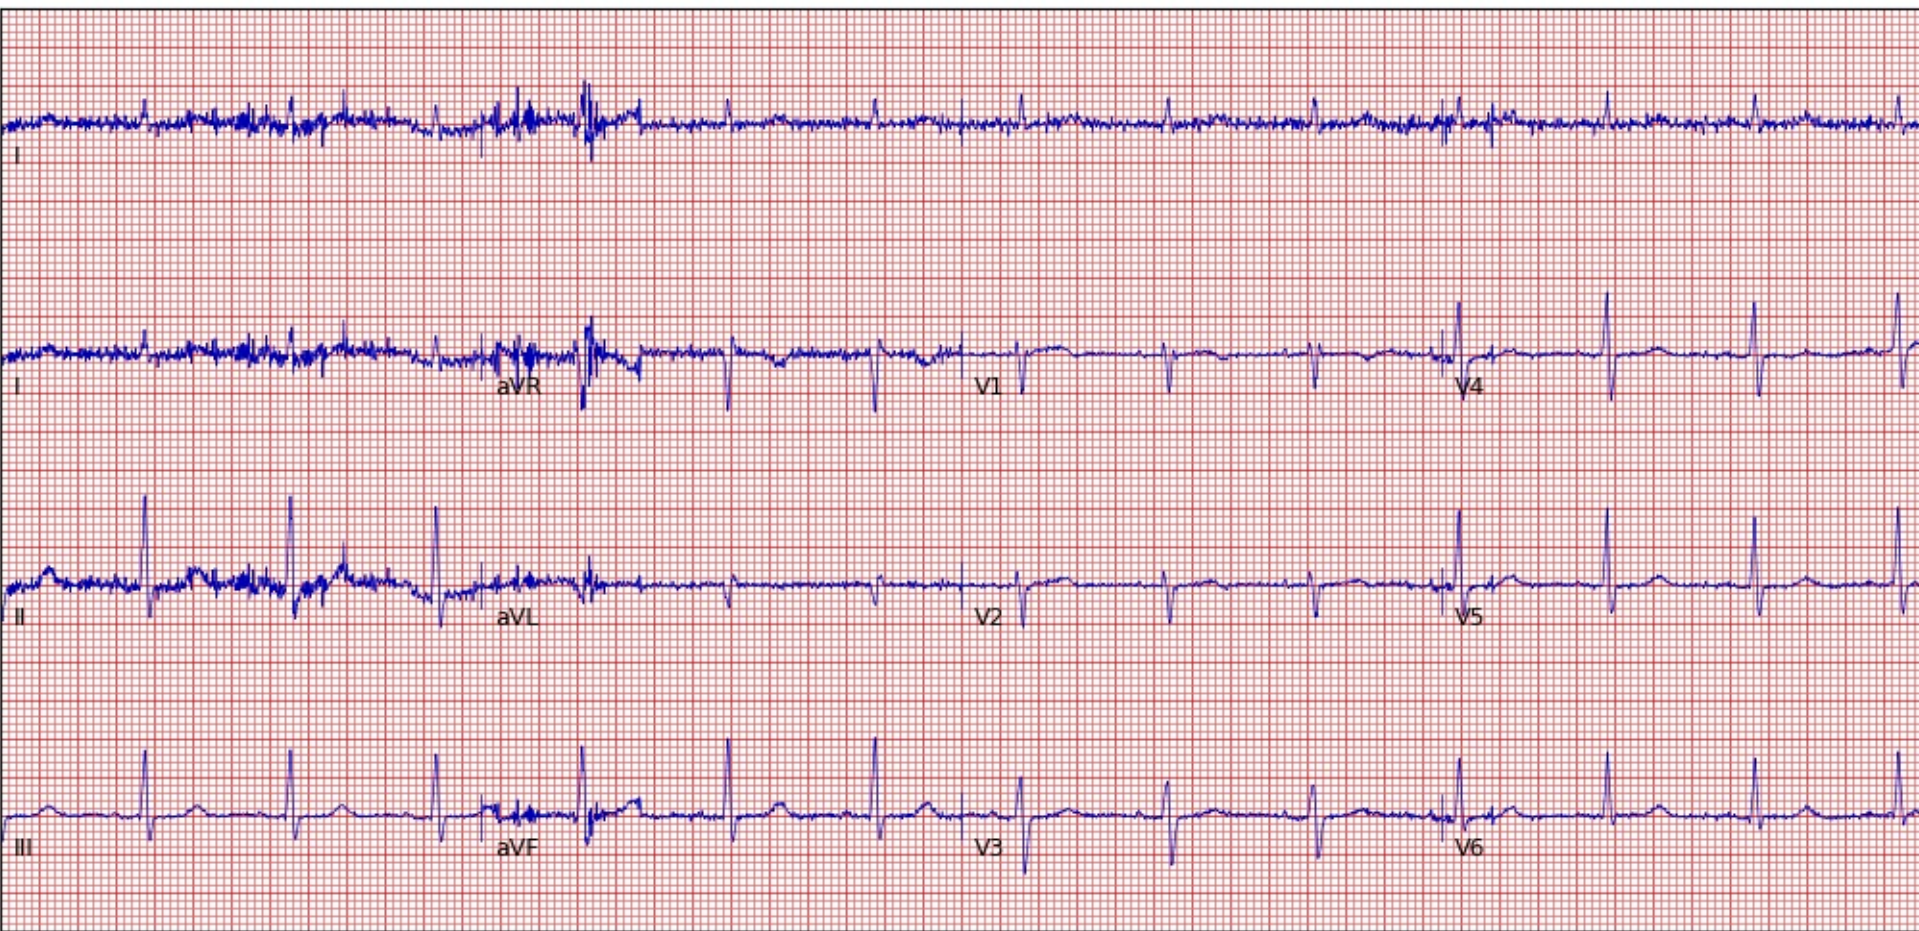

Supplement: media-2.pdf [file media-2.pdf]
